# Supplementary material for: Separation of microplastics from deep-sea sediment using an affordable, simple to use, and easily accessible density separation device
Source: Research Square preprint supplement (doi:10.21203/rs.3.rs-4225311/v1), 2024-04-19
Supplement: Supplementary file 1 [file 3defae76f74070748a029c04.xlsx]

## Sheet: Table 1 Condensed Lit Review
		Mean ± standard deviation of percent recovery✝
Reference	Separation apparatus	PP	PE	PS	Nylon	PET	PVC
Duong et al. 2022	Beaker	90 ± 7	93.3 ± 2	96.7 ± 3	-	71.7 ± 3	36.7 ± 3
Konechnaya et al. 2020	Beaker	100 ± 0.5	100 ± 1.3	101 ± 0.4	97 ± 0.6	102 ± 2.9	98 ± 1.5
Zobkov and Esiukov 2017	Beaker	-	-	-	-	92 ± 7	-
Monteiro et al. 2022	Glass centrifuge tube, centrifuge	93 ± 0	100 ± 0	-	82 ± 1	96 ± 1	93 ± 0
Maes et al. 2017	Plastic centrifuge tube, centrifuge	-	98	-	95	-	-
Fries et al. 2013	Separatory funnel	-	95 ± 5.3	-	-	-	-
Cashman et al. 2022	Separatory funnel	100.07	100.69	86.18		45.13	126.64
Claessens et al. 2013	Elutration Column	-	-	-	-	-	100
Vermeiren et al. 2020	Decanting column	80	70	-	-	100	100
Nuelle et al. 2014	air induced overflow (AIO) and volumetric flask	95.0 ± 7.6	100 ± 0	90 ± 11.5	-	93.3 ± 7.5	100 ± 0
Vermeiren et al. 2020	overflow column with top inflow (OC-T)	100	100	-	-	100	90
Vermeiren et al. 2020	overflow column with mid-level inflow (OC-M)	20	10	-	-	30	50
Vermeiren et al. 2020	Sediment-Microplastic Isolation (SMI)	100	100	-	-	90	100
Coppock et al. 2017	Sediment-Microplastic Isolation (SMI)	-	97	-	92	-	94
Nel et al. 2019	Sediment-Microplastic Isolation (SMI)	83 ± 2	83 ± 2	-		87 ± 3	-
Nakajima et al. 2019	JAMSTEC microplastic-sediment separator (JAMSS)	96.3 ± 3.0	96.3 ± 4.4	98.7 ± 3.0	-	96.7 ± 3.5	96.8 ± 3.3
Imhof et al. 2012	Munich Plastic Sediment Separator (MPSS)	100	100	95	100	100	100
This study	Density Separation Device (DSD)	78.4 ± 34.0	93.8 ± 13.5	86.9 ± 25.7	98.4 ± 63.2	28.1 ± 18.4	100.0 ± 12.4
