# Supplementary material for: Separation of microplastics from deep-sea sediment using an affordable, simple to use, and easily accessible density separation device
Source: Research Square preprint supplement (doi:10.21203/rs.3.rs-4225311/v1), 2024-04-19
Supplement: Supplementary file 3 [file 7de638157afa35fff74faf44.xlsx]

## Sheet: Table 2 Apparatus Comparison
	Beaker, cylinder, flask, bottle, tube	Centrifugation in tube	Separatory Funnel	Elutration Column	Air Induced overflow (AIO) and volumetric flask	Overflow column with mid level inflow (OC-M)	Overflow column with topl inflow (OC-T)	Sediment Microplastics Isolation (SMI)	JAMSTEC microplastic sediment separator	Munich Plastic Separation System? (MPSS)	Density Separation Device (DSD)
Cost	$	$$$	$$	$$$	$$	$	$	$	$$$	$$$	$$
Accessibility	Common in labs	Need centrifuge	Common	Need Centrifuge	Custom made	Custom Made	Hardware store	Hardware store	Custom made	Discontinued	Order online
Plastic materials?	No	No	Yes- Stopcock	Yes- PVC pipe	Yes- Pump	Yes- all PVC	Yes- all PVC	Yes- all PVC	No	Yes- o-ring	Yes- o-ring
Apparatus assembly complexity	Easy	Easy	Challenging	Easy	Challenging	Easy	Easy	Easy	Easy	Easy	Easy
Sediment addition	Easy	Easy	Challenging	Easy	Easy	Easy	Easy	Easy	Easy	Easy	Easy
Dense soltuion restrictions	None	Corrosion	None	None	None	None	None	None	None	Corrosion	Corrosion
Mixing options	Stir bar, vortex, glass rod	Shake, vortex	Swirl	Water Flow	Unknown	Air Flow	Addition of Dense Fluid	Shake, stir bar	Stir bar, gass rod	Internal blades	Shake, add balls
Can top and bottom chambers be partitioned?	No	No	No	No	No	No	No	Yes	No	Yes	Yes
Decanting	Pour, pipet	Pour, pipet	top and bottom	Overflow	Overflow	Overflow	Overflow	Pour without sieve	Pour, Pipet	Pour w/out sieve	Pour with sieve
Multiple additions of dense solution to obtain multiple addition steps	Yes	Yes	No	Continuous	Continuous	Continuous	Continuous	Continuous	Yes, difficult	Continuous	Continuous
Additional cleaning steps w/in apparatus (vacuum, chemical digestion)	No	No	No	No	No	No	No	No	No	No	Yes
Rinsing ability to maximize particle recovery	No ability	No ability	Can rinse	Unnecessary	Unknown	Unnecessary	Unnecessary	Can rinse	Can rinse	Can rinse	Can rinse
Separation speed	Gravity	Fast	Gravity	Gravity	Gravity	Gravity	Gravity	Gravity	Gravity	Gravity	Gravity
Take down ease	Very simple	Very simple	Simple	Very simple	Challenging	Simple	Very simple	Simple- Moderate	Very Simple	Challenging	Simple-Moderate
