# Supplementary material for: Separation of microplastics from deep-sea sediment using an affordable, simple to use, and easily accessible density separation device
Source: Research Square preprint supplement (doi:10.21203/rs.3.rs-4225311/v1), 2024-04-19
Supplement: Supplementary file 4 [file b2bfc6f921f397f63a353e4f.xlsx]

## Sheet: Table 4 Recoveries
Spiked polymer	1st Rep # spiked	1st Rep # recovered	1st Rep % recovery	2nd Rep # spiked	2nd Rep # recovered	2nd Rep % recovery	3rd Rep # spiked	3rd Rep # recovered	3rd Rep % recovery	Mean % Recovery	SD of % Recovery
CR*	36	48	133.3	61	48	26.2	54	44	48.1	92.7	30.8
PP	23	25	108.7	24	11	41.7	27	23	85.2	78.4	34
HDPE	21	20	85.7	23	25	108.7	20	17	85	93.8	13.5
PS	21	21	100	18	10	55.6	22	22	100	86.9	25.7
PA6	22	37	168.2	21	10	47.6	20	15	75	98.4	63.2
PVC	22	23	104.5	20	22	110	22	19	86.4	100	12.4
PEST (Fiber)	9	5	55.6	10	2	20	10	0	0	24.1	28.1
CA (Fiber)	9	4	44.4	10	1	10	8	2	25	25.9	17.3
