# Supplementary material for: Separation of microplastics from deep-sea sediment using an affordable, simple to use, and easily accessible density separation device
Source: Research Square preprint supplement (doi:10.21203/rs.3.rs-4225311/v1), 2024-04-19
Supplement: Supplementary file 5 [file d85f2ae1faf3bca62eb5888a.xlsx]

## Sheet: Table 3 Compatibility 
	Sodium Polytungstate			Vinegar
	ATR Percent Match	Percent Mass Change		ATR Percent Match	Percent Mass Change
Crumb Rubber	51.3 ± 28.8	0.293 ± 1.88		61.8 ± 19.8	-0.825 ± 0.846
Polypropylene	98.0 ± 0.835	0.164 ± 0.835		98.3 ± 0.652	-1.025 ± 2.48
High Density Polyethylene	98.6 ± 0.465	0.0780 ± 0.306		97.9 ± 1.03	0.0500 ± 0.173
Polystyrene	98.0 ± 0.308	0.0803 ± 0.299		95.8 ± 3.10	-0.175 ± 0.568
Nylon	93.5 ± 4.80	-11.6 ± 19.9		94.7 ± 3.80	-1.00 ± 0.245
Polyvinyl Chloride	85.7 ± 3.77	0.0349 ± 0.293		76.5 ± 8.40	-0.0500 ± 0.252
Polyester FIber	91.1 ± 4.35	-12.7 ± 4.35		95.3 ± 4.13	-4.38 ± 3.50
Cellulose Acetate Fiber	93.8 ± 1.4	-3.75 ± 0.622		92.9 ± 1.03	-6.38 ± 0.806
