# Supplementary material for: Separation of microplastics from deep-sea sediment using an affordable, simple to use, and easily accessible density separation device
Source: Research Square preprint supplement (doi:10.21203/rs.3.rs-4225311/v1), 2024-04-19
Supplement: Supplementary file 6 [file dcf779b292a2358f4b37189f.xlsx]

## Sheet: Table S1 Full Lit Review
Author	Year	Title	Spiking Methodology Paper?	Method Reviewed/Based on	Heavy Density Solution Used	Additional Chemicals	Device Used	Sediment Type	Polymer Identification	PS 1 size	PS 1 shape	PS 1 color	PS 1 recovery	PS 1 source	PS 2 size	PS2 shape	PS 2 color	PS 2 recovery	PS 2 source	PS 3 size	PS 3 shape	PS 3 color	PS 3 recovery	PS 3 source	PS 4 size	PS 4 shape	PS 4 color	PS 4 recovery	PS 4 source	PE 1 size	PE 1 shape	PE 1color	PE 1 recovery	source	PE 2 size	PE 2 shape	PE 2 color	PE 2 recovery	source	PE 3 size	PE 3 shape	PE 3 color	PE 3 recovery	PE 3 Source	PE 4 size	PE 4 shape	PE 4 color	PE 4 recovery	PE 4 Source
Cashman et al	2020	Comparison of microplastic isolation and extraction procedures from marine sediments	Yes	Fries et al. 2013	Sodium chloride at 1.2 g/mL	-	Seperatory Funnel	Sandy	Nikon SMZ745-T microscope	40 µm	sphere	transparent	7.2 ± 7.8	Cospheric																96-106 µm	sphere	blue	58.8 ± 32.8	Cospheric
Cashman et al	2020	Comparison of microplastic isolation and extraction procedures from marine sediments	Yes	Fries et al. 2013	Sodium chloride at 1.2 g/mL	-	Seperatory Funnel	Silty	Nikon SMZ745-T microscope	40 µm	sphere	transparent	6.5 ± 5.5	Cospheric																96-106 µm	sphere	blue	11.8 ± 7.8	Cospheric
Cashman et al	2020	Comparison of microplastic isolation and extraction procedures from marine sediments	Yes	Gilbreath et al. 2019	Calcium chlorie at 1.4 g/mL	-	Beaker and Seperatory Funnel	Sandy	Nikon SMZ745-T microscope	40 µm	sphere	transparent	0.0 ± 0.0	Cospheric																96-106 µm	sphere	blue	56.6 ± 32.4	Cospheric
Cashman et al	2020	Comparison of microplastic isolation and extraction procedures from marine sediments	Yes	Gilbreath et al. 2019	Calcium chlorie at 1.4 g/mL	-	Beaker and Seperatory Funnel	Silty	Nikon SMZ745-T microscope	40 µm	sphere	transparent	0.0 ± 0.0	Cospheric																96-106 µm	sphere	blue	53.0 ± 25.5	Cospheric
Cashman et al	2020	Comparison of microplastic isolation and extraction procedures from marine sediments	Yes	Nuelle et al. 2014	Sodium chloride at 1.2 g/mL and Sodium Iodide at 1.8 g/mL	-	Air Induced Overflow and volumetric flask	Sandy	Nikon SMZ745-T microscope	40 µm	sphere	transparent	13.4 ± 11.0	Cospheric																96-106 µm	sphere	blue	61.7 ± 24.3	Cospheric
Cashman et al	2020	Comparison of microplastic isolation and extraction procedures from marine sediments	Yes	Nuelle et al. 2014	Sodium chloride at 1.2 g/mL and Sodium Iodide at 1.8 g/mL	-	Air Induced Overflow and volumetric flask	Silty	Nikon SMZ745-T microscope	40 µm	sphere	transparent	18.8 ± 1.5	Cospheric																96-106 µm	sphere	blue	26.5 ± 20.7	Cospheric
Cashman et al	2020	Comparison of microplastic isolation and extraction procedures from marine sediments	Yes	Coppock et al. 2017	Zinc chloride at 1.5 g/mL	30% Hydrogen Peroxide	Sediment microplastics isolation unit (SMI)	Sandy	Nikon SMZ745-T microscope	40 µm	sphere	transparent	6.6 ± 5.2	Cospheric																96-106 µm	sphere	blue	32.1 ± 19.5	Cospheric
Cashman et al	2020	Comparison of microplastic isolation and extraction procedures from marine sediments	Yes	Coppock et al. 2017	Zinc chloride at 1.5 g/mL	30% Hydrogen Peroxide	Sediment microplastics isolation unit (SMI)	Silty	Nikon SMZ745-T microscope	40 µm	sphere	transparent	17.5 ± 10.8	Cospheric																96-106 µm	sphere	blue	52.9 ± 22.1	Cospheric
Cashman et al	2020	Comparison of microplastic isolation and extraction procedures from marine sediments	Yes	Zobkov and Esiukov 2017	Zinc chloride at 1.6 g/mL	Fenton's Reagent (30% H202 and Fe(II) catalyst, followed by 4.5% Hydrochloric acid	Beakers	Sandy	Nikon SMZ745-T microscope	40 µm	sphere	transparent	0.0 ± 0.0	Cospheric																96-106 µm	sphere	blue	0.0 ± 0.0	Cospheric
Cashman et al	2020	Comparison of microplastic isolation and extraction procedures from marine sediments	Yes	Zobkov and Esiukov 2017	Zinc chloride at 1.6 g/mL	Fenton's Reagent (30% H202 and Fe(II) catalyst, followed by 4.5% Hydrochloric acid	Beakers	Silty	Nikon SMZ745-T microscope	40 µm	sphere	transparent	0.0 ± 0.0	Cospheric																96-106 µm	sphere	blue	0.0 ± 0.0	Cospheric
Cashman et al.	2022	Quantification of microplastics in sediments from Narragansett Bay, Rhode Island USA using a novel isolation and extraction method	Yes	Cashman et al. 2020	Sodium bromide at 1.3 g/cm3 and 1.5 g/cm3	30% hydrogen peroxide	Separatory funnel	Sandy	Nikon microscope at 2x magnification	40 µm	sphere	green	101.83	Cospheric																96-106 µm	sphere	blue	95.9	Cospheric
Cashman et al.	2022	Quantification of microplastics in sediments from Narragansett Bay, Rhode Island USA using a novel isolation and extraction method	Yes	Cashman et al. 2020	Sodium bromide at 1.3 g/cm3 and 1.5 g/cm3	30% hydrogen peroxide	Separatory funnel	Silty	Nikon microscope at 2x magnification	40 µm	sphere	green	86.18	Cospheric																96-106 µm	sphere	blue	100.69	Cospheric
Ceccarini et al	2018	The Hidden Microplastics: New Insights and Figures from the Thorough Separation and Characterization of Microplastics and ofTheir Degradation Byproducts in Coastal Sediments	Yes	-	Dichloromethane 99.9% stabilized with amilene		Kumagawa-type extraction apparatus	Sandy	FT-IR, Pyrolysis-GC-MS, GPC, and H NMR																					50 µm	powder	N/A	96.5 ± 2.2%	Aged Blown Film
Claessens et al.	2013	New techniques for the detecion of microplastics in sediments and field collected organisms	Yes	Thompson et al. 2004	Sodium chloride at 1.2 kg/L			"Clean Field Sample"	Dissection Microscope
Claessens et al.	2013	New techniques for the detecion of microplastics in sediments and field collected organisms	Yes		Sodium Iodide at 1.6 kg/L		Elutration column	"Clean Field Sample"	Dissection Microscope
Coppock et al	2017	A small-scale, portable method for extracting microplastics from marine sediments	Yes		Zinc chloride at 1.5 g/mL	-	Sediment-Microplastic Isolation (SMI) Unit	Fine Estuarine Sediment	Microscope FTIR																					200 - 1000 µm	weathered fiber	orange or blue	~96	N/A	400 - 1000 µm	fragment	bright green	~98	N/A
Crichton et al.	2017	A novel, density-independent and FTIR-compatible approach for the rapid extraction of microplastics from aquatic sediments	Yes		Canola Oil		Erlenmeyer flask and separatory funnel	Beach Sand	FTIR or microscope FTIR
Crichton et al.	2017	A novel, density-independent and FTIR-compatible approach for the rapid extraction of microplastics from aquatic sediments	Yes	Nuelle et al.	Sodium Iodide at 1.98 g/mL		Volumetric flask	Beach Sand	FTIR or microscope FTIR
Crichton et al.	2017	A novel, density-independent and FTIR-compatible approach for the rapid extraction of microplastics from aquatic sediments	Yes	Stolte et al.	Calcium Chloride at 1.46 g/cm3		Beakers	Beach Sand	FTIR or microscope FTIR
Di and Wang	2018	Microplastics in surface waters and sediments of the Three Gorges Reservoir, China	Yes		Saturated sodium chloride and 60% sodium iodide	Hydrogen peroxide at beginning and end	Glass beakers	River sediment	micro-Raman spectroscopy	< 1 mm			70		1 - 2 mm			90		2 - 5 mm			100							< 1 mm			80		1 - 2 mm			90		2 - 5 mm			100
Duong et al.	2022	Selection of a density separation solution to study microplastics in tropical riverine sediment	Yes	Strady et al., 2021	Sodium Chloride at 1.2 g/cm3	Hydrogen peroxide before spiking	beaker- overflow method	Standard Riverine Sediment	Raman	300-500 μm	fragment	White	96.7 ± 3	Consumer good- food container																300 - 500 μm	fragment	Yellow	95 ± 5	Consumer good- beached yellow fish box	300 - 500 μm	fragment	Green	93.3 ± 2	Consumer good- supermarket bag HDPE
Duong et al.	2022	Selection of a density separation solution to study microplastics in tropical riverine sediment	Yes	Strady et al., 2021	Sodium Iodide at 1.6 g/cm3	Hydrogen peroxide before spiking	beaker- overflow method	Standard Riverine Sediment	Raman	300-500 μm	fragment	White	88	Consumer good- food container																300 - 500 μm	fragment	Yellow	90	Consumer good- beached yellow fish box	300 - 500 μm	fragment	Green	88	Consumer good- supermarket bag
Duong et al.	2022	Selection of a density separation solution to study microplastics in tropical riverine sediment	Yes	Strady et al., 2021	Zinc chloride at 1.5 g/cm3	Hydrogen peroxide before spiking	beaker- overflow method	Standard Riverine Sediment	Raman	300-500 μm	fragment	White	87	Consumer good- food container																300 - 500 μm	fragment	Yellow	97	Consumer good- beached yellow fish box	300 - 500 μm	fragment	Green	85	Consumer good- supermarket bag
Duong et al.	2022	Selection of a density separation solution to study microplastics in tropical riverine sediment	Yes	Strady et al., 2021	Calcium chloride at 1.4 g/cm3	Hydrogen peroxide before spiking	beaker- overflow method	Standard Riverine Sediment	Raman	300-500 μm	fragment	White	78	Consumer good- food container																300 - 500 μm	fragment	Yellow	83	Consumer good- beached yellow fish box	300 - 500 μm	fragment	Green	83	Consumer good- supermarket bag
Enders et al.	2020b	Evaluation of Electrostatic Separation of Microplastics From Mineral-Rich Environmental Samples	Yes	Felsing et al. 2018; Enders et al. 2020	Sodium Polytungstate		Electrostatic Separation- Korona-Walzen-Scheider (KWS)	Beach Sand	Microscope with UV light source																					2 mm	pellet	white	100		2 mm	fiber	green	95		63 - 74 um	sphere	blue florescent	19		20 - 27um	sphere	green florescent	2
Fries et al	2013	Identification of polymer types and additives in marine microplastic particles using pyrolysis-GC/MS and scanning electron microscopy	Yes	-	Sodium chloride at 1.2 g/mL	-	Separatory Funnel	Sandy	stereomicroscope Wild M3Z, SEM Analysis, Pyrolysis GC-MS	-	-	-	-																	1 mm x 0.2 mm x 0.2 mm	rasp	black	95 ± 5.3	Black 190900-S, AMPACET Europe S.A., Windhof, Luxembourg
Hengstmann et al.	2018	Microplastic in beach sediments of the Isle of Rügen (Baltic Sea) - Implementing a novel glass elutriation column	Yes		Water		Elutration Column	Sieved River Sediment	Nile Red and UV light
Hurley et al	2018	Validation of a method for extracting microplastic from complex,organic rich enviormental matricies	Yes	-	Sodium Iodide at 1.8 g/cm3	Fenton's Reagent (30% H202 and Fe(II) catalyst)	glass jars or tubes	Sludge	ATR-FTIR																					850-1000 um	microbead	White	100	Manufacturer- Cospheric, CA, USA	425-500 um	microbead	white	97	Manufacturer- Cospheric, CA, USA
Hurley et al	2018	Validation of a method for extracting microplastic from complex,organic rich enviormental matricies	Yes	-	Sodium Iodide at 1.8 g/cm3	Fenton's Reagent (30% H202 and Fe(II) catalyst)	glass jars or tubes	Soil	ATR-FTIR																					850-1000 um	microbead	White	100	Manufacturer- Cospheric, CA, USA	425-500 um	microbead	white	99	Manufacturer- Cospheric, CA, USA
Imhof et al	2012	A novel , highly efficient method for the seperation and quantifacation of plastic particles in sediment of aqatic enviorments	Yes		Zinc Chloride at 1.6-1.7 kg/L	hydrogen peroxide (30%)	Munich Plastic Sediment Separator (MPSS)	River sediment	Raman	3 mm	virgin pellet		100	manufacturer																3 mm	HDPE- virgin pellet		100	manufacturer
Imhof et al	2012	A novel , highly efficient method for the seperation and quantifacation of plastic particles in sediment of aqatic enviorments	Yes		Zinc Chloride at 1.6-1.7 kg/L	hydrogen peroxide (30%)	Munich Plastic Sediment Separator (MPSS)	River sediment	Raman	80 µm	fragment			manufacturer																309 µm	fragment			manufacturer
Imhof et al	2012	A novel , highly efficient method for the seperation and quantifacation of plastic particles in sediment of aqatic enviorments	Yes	Froth Floatation		wetting agent (pine oil), froth conditioner, surfactant (dishwasher tab)	Froth Floatation-	River sediment	Raman	2.9 mm	virgin pellet		40	manufacturer																2.6 mm	HDPE- virgin pellet		90	manufacturer	2.6 mm	fragment
Imhof et al	2012	A novel , highly efficient method for the seperation and quantifacation of plastic particles in sediment of aqatic enviorments	Yes	Hidalgo-Ruz et al. 2012	Zinc Chloride at 1.6-1.7 kg/L	hydrogen peroxide (30%)	Munich Plastic Sediment Separator (MPSS)	River sediment	Raman	3 mm	virgin pellet		95	manufacturer																3 mm	HDPE- virgin pellet		100	manufacturer
Imhof et al	2012	A novel , highly efficient method for the seperation and quantifacation of plastic particles in sediment of aqatic enviorments	Yes	Hidalgo-Ruz et al. 2012	Zinc Chloride at 1.6-1.7 kg/L	hydrogen peroxide (30%)	Munich Plastic Sediment Separator (MPSS)	River sediment	Raman	80 µm	fragment			manufacturer																309 µm	fragment			manufacturer
Katsumi et al.	2023	Addition of polyvinyl pyrrolidone during density separation with sodium iodide solution improves recovery rate of small microplastics (20–150 μm) from soils and sediments	Yes		82% NaI with 0.5% polyvinyl pyrrolidone (PVP)	Hydrogen peroxide, hydrogen fluoride	centrifuge	Paddy Soil, Lake and Marine Sediment	Microscope FTIR	20-40 µm	fragment	stained red	94	Pellets from Sigma-Aldrich																27-45 µm	microbead	blue	~97	Manufacturer- Cospheric, Goleta, CA, USA	63-75 µm	microbead	pink	~93	Manufacturer- Cospheric, Goleta, CA, USA	125-150 µm	microbead	yellow	~95	Manufacturer- Cospheric, Goleta, CA, USA	250-300 µm	microbead	yellow	>90	Manufacturer- Cospheric, Goleta, CA, USA
Konechnaya et al.	2020	Optimized microplastic analysis based on size fractionation, density separation and μ-FTIR	Yes	Semensatto & Dias-Brito 2007	>1.6 g/cm3		Beaker	Sand	Microscope FTIR	1000 - 5000 um	fragment	red/yellow	101 ± 0.4	Consumer good- Document box	400 - 1000 um	fragment	red/yellow	99 ± 1.4	Consumer good- Document box	200 - 400 um	fragment	red/yellow	98 ± 0.4	Consumer good- Document box	100 - 200 um	fragment	red/yellow	96 ± 3.3	Consumer good- Document box	1000 - 5000 um	fragment	green	100 ± 1.3	Consumer Good- bottle cap	400 - 1000 um	fragment	green	100 ± 0.3	Consumer Good- bottle cap	200 - 400 um	fragment	green	97 ± 0.8	Consumer Good- bottle cap	100 - 200 um	fragment	green	95 ± 1.6	Consumer Good- bottle cap
Kononov et al.	2022	Microplastic Extraction from Agricultural Soils Using Canola Oil and Unsaturated Sodium Chloride Solution and Evaluation by Incineration Method	Yes		NaCl at 5 g/L, Canola Oil	30% Hydrogen Peroxide	Separatory Funnel	Agricultural Soil	Microscope or Atmospheric Electric Furnace																					1 - 2 mm	fragment		97.4 ± 0.3	Commercial pellets
Lechthaler et al.	2020	Canola oil extraction in conjunction with a plastic free separation unit optimises microplastics monitoring in water and sediment	Yes		Oil		Sediment-Microplastic- Isolator (SMI)	Artificial quartz sand	Visual Identification	4.4 mm	sphere	Orange	40	Post Processing Product																0.1 mm	Microbead	blue	100	Post Processing Products	3.0 mm	film	Transparent	100	Post Processing Products
Maes et al.	2017	A rapid-screening approach to detect and quantify microplastics based on fluorescent tagging on Nile Red	Yes	-	Zinc Chloride at 1.37 g/mL		glass membrane filtration, centrifuge	Coarse Sand from English Channel	Fluorescence, photos																					0.1 - 0.5 mm	fragment	Nile Red dyed flourescent	0.97
Maes et al.	2017	A rapid-screening approach to detect and quantify microplastics based on fluorescent tagging on Nile Red	Yes	-	Zinc Chloride at 1.37 g/mL		glass membrane filtration, centrifuge	Fine Silt from English Channel	Fluorescence, photos																					0.1 - 0.5 mm	fragment	Nile Red dyed flourescent	0.88
Maisto et al.	2022	Influence of seidment texture on HDPE microplastics recovery by density separation	Yes		Sodium Chloride at 1.2 g/cm3		beaker	Sandy soil	stereo microscope																					2.5 μm - 5 mm	fragment		87.88 ± 3.25	Consumer good- HDPE bottle cap
Maisto et al.	2022	Influence of seidment texture on HDPE microplastics recovery by density separation	Yes		Sodium Chloride at 1.2 g/cm3		beaker	Sandy- loam sediment	stereo microscope																					2.5 μm - 5 mm	fragment		76.94 ± 4.64	Consumer good- HDPE bottle cap
Maisto et al.	2022	Influence of seidment texture on HDPE microplastics recovery by density separation	Yes		Sodium Chloride at 1.2 g/cm3		beaker	Sandy-clay-loam sediment	stereo microscope																					2.5 μm - 5 mm	fragment		72.91 ± 4.51	Consumer good- HDPE bottle cap
Mani et al.	2019	Using castor oil to separate microplastics from four different environmental matrices	Yes	Chrichton et al. 2017	Castor Oil	60 % Ethanol	Separatory Funnel	Suspended soilds, sediment, and soil	ATR-FTIR	0.3 - 1.0 mm	fragment	red	99 ± 3	Commercially available pellet
Monteiro et al.	2022	A straightforward method for microplastic extraction from organic-rich freshwater samples	Yes		Water, Zinc chloride at 1.8 g/mL	NaClO	centrifuge, glass flask	Artificial river sediment	ATR-FTIR	0.5 - 1 mm	fragment		?	Pellets from Sigma-Aldrich	1 - 2 mm	fragment		?	Pellets from Sigma-Aldrich											0.5 - 1 mm	fragment		96 ± 4 %	Pellets from Sigma-Aldrich	1 - 2 mm	fragment		100 ± 0	Pellets from Sigma-Aldrich	0.5 - 1 mm	fragment			Weathered consumer good from beach	1 - 2 mm	fragment		91 ± 8	Weathered consumer good from beach
Nakajima et al.	2019	A new small device made of glass for separating microplastics from marine and freshwater sediments	Yes		Sodium Iodide at 1.6 g.cm3	-	JAMSTEC microplastic-sediment separator (JAMSS)	Sand	Stereomicroscope	100 - 500 μm	fragment		96.0 ± 4.2	Commercially available plastic plate	500 - 1000 μm	fragment		100 ± 0	Commercially available plastic plate	1000 - 2000 μm	fragment		100 ± 0	Commercially available plastic plate						100 - 500 μm	fragment		92.5 ± 5.6	Commercially available plastic plate	500 - 1000 μm	fragment		97.5 ± 2.5	Commercially available plastic plate	1000 - 2000 μm	fragment		99.0 ± 1.4	Commercially available plastic plate
Nel et al.	2018	Simple yet effective modifications to the operation of the Sediment Isolation Microplastic unit to avoid polyvinyl chloride (PVC) contamination	Yes	Coppock et al. 2017	Zinc chloride at 1.5 g/mL	-	Sediment-Microplastic Isolation (SMI) Unit	Fine Estuarine Sediment	Microscope FTIR																					N/A	fragment	N/A	83 ± 2	N/A
Nuelle et al.	2014	A new analytical approach for monitoring microplastics in marine sediments	Yes		Sodium chloride at 1.2 g/mL and Sodium Iodide at 1.8 g/mL	-	Air Induced Overflow and volumetric flask	Aquarium Sand	stereoscope and Pyrolysis GC/MS	1 mm	fragment	Yellow/white	90 ± 11.5																	1 mm	fragment	red	100 ± 0
Nuelle et al.	2014	A new analytical approach for monitoring microplastics in marine sediments	Yes		Sodium chloride at 1.2 g/mL and Sodium Iodide at 1.8 g/mL	35 % hydrogen peroxide	Air Induced Overflow and volumetric flask	Aquarium Sand	stereoscope and Pyrolysis GC/MS	1 mm	fragment	Yellow/white	95.0 ± 5.8																	1 mm	fragment	red	97.5 ± 5.0
Ourgaud et al.	2022	Identification and Quantification of Microplastics in the Marine Environment Using the Laser Direct Infrared (LDIR) Technique	Yes		Sodium Chloride at 350 g/L (35%)		glass bottles and centrifuge	Marine sediment	LDIR	44 to 1937 μm	fragment		107 ± 42	Pellets from CARAT (Bocholt, Germany)																44 to 1937 μm	fragment		98 ± 17	Pellets from CARAT (Bocholt, Germany)
Peez et al.	2019	Quantitative analysis of PET microplastics in enviornmental model samples using quantitative H-NMR spectroscopy: validation of an optimized and consistent sample cleanup	Yes		N/A	digestion: 50% sulfuric acid and 30% hydrogen peroxide; deuterated solvent	glass beakers	Sand	qNMR
Peez et al.	2019	Quantitative analysis of PET microplastics in enviornmental model samples using quantitative H-NMR spectroscopy: validation of an optimized and consistent sample cleanup	Yes		N/A	deuterated solvent	glass beakers	Sand	qNMR
Rendell-Bhatti et al.	2023	From the environment into the biomass: microplastic uptake in a protected lamprey species	Yes		Sodium Polytungstate at 1.7 g/cm3	Fenton's reagent x2	graduated cylinder	Riverbed Sediment	microscope FTIR	~45 μm			53.4 ± 30.4	Commercial product- Polysciences Europe GmbH, Germany, 840 MP/ml
Stolte et al	2015	Microplastic concentrations in beach sediments along the German Baltic coast	Yes	Hidalgo-Ruz et al. 2012	Calcium chloride at 1.30-1.35 g/mL	stereo microscope (no spectrology)	Erlemeyer Flask	Grain Size <0.5 mm	none																					100 µm - 1 mm	fragment	light violet	~83		100 µm - 1 mm	fragment	blue	~80		100 µm - 1 mm	fragment	light blue	100		100 µm - 1 mm	fragment	green	~70
Tsering et al.	2022	The assessment of particle selection and blank correction to enhance the analysis of microplastics with Raman microspectroscopy	Yes	Loder et al. 2017	sodium tungstate dihydrate at 1.4 g/cm3	sodium dodecyl sulphate solution (10%) , protease, cellulase, chitinase, Fenton's reagent	Glass Bottle	BCR-701 lake sediment, JRC	Visual Identification or Raman	240 - 586 μm	fragment	White	76 ± 14	Consumer Good- Laboratory Weighing Cup
Vermeiren et al.	2020	Microplastic identification and quantification from organic rich sediments: A validated laboratory protocol			ZnCl₂ at 1.5 g/mL	Fenton's reagent	overflow column with top inflow (OC-T)	Intertidal Mudflat Sediment
Zobkov and Esiukova	2017	Microplastics in Baltic Bottom Sediments: Quantification procedures and first results	Yes		Zinc chloride at 1.6 g/mL	Fenton's Reagent (30% H202 and Fe(II) catalyst, followed by 4.5% Hydrochloric acid	Beakers	Marine Sediment
[truncated: 161 more columns]

## Sheet: Table S2. Amazon List
Size	Name	Price	Quantity
1.5 inch	DERNORD 1.5" Tri Clamp to 0.5" Hose Barbed Adapter SUS304 Sanitary Hose Pipe Fitting (1/2 Inch Barb Hose)	9.99	1
1.5 inch	DERNORD Sanitary End Cap fits Tri-Clamp Ferrule Flange Stainless Steel 304 Fitting Clamp (1.5" (38mm) Tube OD)	6.59	2
1.5 inch	Beduan Sanitary Butterfly Tri Clamp Valve with Slicone Gasket SUS304 1.5 Inch Tri Clamp Clover Type (1.5" Tube OD) In Stock	26.99	1
1.5 inch	Uxcell 1/2 Inch Bearing Balls 316L Stainless Steel G100 Precision Balls 20pcs	14.99	1
1.5 inch	QiiMii 1.5" in-Line Sight Glass with Clamp End, Flow Sanitary Straight Sight Glass Tri-clamp, with 2 pcs 1.5" tri-clamp and Silicone Gasket	35.99	2
1.5 inch	ARTESIAN SYSTEMS 20 Micron VITON/FKM Tri Clamp Screen Filter Gasket 316L (20Uf Micron/625Mesh) Stainless Steel Pharmaceutical Grade Filter Mesh. VITON With & FDA Certification (1.5")	17	1
1.5 inch	DERNORD Silicone Gasket Tri-Clover (Tri-clamp) O-Ring - 1.5 Inch (Pack of 10)	13.19	1
3 inch	DERNORD Sanitary Tri Clamp to NPT Female Tri Clover (1/4" NPT Female ( 3 inch Tri-clamp ))	18.99	1
3 inch	DERNORD Stainless Steel 304 Sanitary Fitting Clamp End Cap fits Tri-Clamp Ferrule Flange (3" (76mm) Tube OD)	10.99	2
3 inch	DERNORD Sanitary Butterfly Valve with Pull Handle Stainless Steel 304 Tri Clamp Clover ( 3" Tube OD )	79.99	1
3 inch	Uxcell 1/2 Inch Bearing Balls 316L Stainless Steel G100 Precision Balls 20pcs	13.79	1
3 inch	DERNORD In-Line Sight Glass with Clamp End,Flow Sanitary Straight Sight Glass SUS316 3 Inch Tri Clamp Type (Flow Pipe OD 76MM)	49.99	2
3 inch	ARTESIAN SYSTEMS 20 Micron VITON/FKM Tri Clamp Screen Filter Gasket 316L (20Uf Micron/625Mesh) Stainless Steel Pharmaceutical Grade Filter Mesh. VITON With & FDA Certification (3")	20	1
3 inch	DERNORD Tri-clamp Single Pin Heavy Duty Tri Clamp Stainless Steel 304 with Wing Nut for Ferrule TC with 1PC Silicone Gasket (3inch Tri Clamp+Silicone Gasket)	13.99	4
0.5 inch	Stainless Steel 3/8" Hose Barb to 1/2" Male NPT Home Brew Fitting Water Fuel Air (Pack of 2)	7.65	1
0.5 inch	Joywayus 3Pcs Stainless Steel Outer Hex Thread Socket Pipe Plug Fitting 1/2" NPT Male	8.98	1
0.5 inch	DERNORD Stainless Steel Ball Valve 1PC Type 0.5" NPT Standard Port for Water, Oil, and Gas (1/2 Inch Ball Valve)	10.95	1
0.5 inch	Uxcell 1/2 Inch Bearing Balls 316L Stainless Steel G100 Precision Balls 20pcs	13.79	1
0.5 inch	DERNORD in-Line Sight Glass with Female Thread,Flow Sanitary Straight Sight Glass SUS316 1/2" NPT Female	33.99	2
0.5 inch	CONCORD 304 Stainless Steel 1/2" NPT to 1/2" NPT Hex Nipple Home Brew. 2 Pack	7.99	1
0.5 inch	PTFE Plumbers Water Sealant Thread Tape 460" Length 1/2" Width White by Vanguard Sealants Perfect for Shower Heads and Pipe Threads	5.99	1

## Sheet: Table S3. Master Data Sheet
Date	Treatment	Step	Replicate	Box	Known Reference Material Polymer	Final Polymer ID	Polymer Size	Wizard or Point and Shoot	Wizard Particle #	Original Length (um)	Original Width (um)	Length (um)	Width (um)	Greater than 100 um?	Fiber?	iN10 Match	% Match	iN10 Reflectance Corrected Match	Match %	Size Corrected Manually?	File Name (path in google drive)	Notes	Include in final count	Partially in other box?
2021-05-07	Spiked	Before	1	All	Polymer Kit 1.0 PP	PP	Large	Wizard	1	1016.9	787.9	976.86	859.64	Yes	No	PP 300 PLUS 4	98.74	PP 300 PLUS 4	98.74	Yes	ssft2_pp_large_wizard		yes
2021-05-07	Spiked	Before	1	All	Polymer Kit 1.0 PP	PP	Large	Wizard	2	1189.8	937.9	1027.88	889.63	Yes	No	PP300PLUS7	92.98	PP300PLUS7	92.98	Yes	ssft2_pp_large_wizard		yes
2021-05-07	Spiked	Before	1	All	Polymer Kit 1.0 PP	PP	Large	Wizard	3	1428	758	1355.29	714.29	Yes	No	PP 300 PLUS 3	99.31	PP 300 PLUS 3	99.31	Yes	ssft2_pp_large_wizard		yes
2021-05-07	Spiked	Before	1	All	Polymer Kit 1.0 PP	PP	Large	Wizard	4	996.2	698.1	921.55	859.81	Yes	No	PP 300 PLUS 4	98.92	PP 300 PLUS 4	98.92	Yes	ssft2_pp_large_wizard		yes
2021-05-07	Spiked	Before	1	All	Polymer Kit 1.0 PP	PP	Large	Wizard	5	138.6	59.9	217.95	138.47	Yes	No	PP 53-100 1	95.5	PP 53-100 1	95.5	Yes	ssft2_pp_large_wizard		yes
2021-05-07	Spiked	Before	1	All	Polymer Kit 1.0 PP	PP	Large	Wizard	6	1261.9	843.9	1144.76	969.55	Yes	No	Unidentified	0	PP300PLUS_8	99.4	Yes	ssft2_pp_large_wizard		yes
2021-05-07	Spiked	Before	1	All	Polymer Kit 1.0 PP	PP	Large	Wizard	7	1515.1	916.1	1442.18	980.35	Yes	No	PP300PLUS7	98.45	PP300PLUS7	98.45	Yes	ssft2_pp_large_wizard		yes
2021-05-07	Spiked	Before	1	All	Polymer Kit 1.0 PP	PP	Large	Wizard	8	385.6	207.2	403.05	344.71	Yes	No	PP300LUS_10	99.29	PP300LUS_10	99.29	Yes	ssft2_pp_large_wizard		yes
2021-05-07	Spiked	Before	1	All	Polymer Kit 1.0 PP	PP	Large	Wizard	9,10,11	322.2	96.9	659.9	443.99	Yes	No	PP300LUS_10	98.38	PP300LUS_10	98.38	Yes	ssft2_pp_large_wizard		yes
2021-05-07	Spiked	Before	1	All	Polymer Kit 1.0 PP	PP	Large	Wizard	12	1318.2	744.8	1049.92	697.8	Yes	No	PP 300 PLUS 4	99.5	PP 300 PLUS 4	99.5	Yes	ssft2_pp_large_wizard		yes
2021-05-07	Spiked	Before	1	All	Polymer Kit 1.0 PP	PP	Large	Wizard	13	799.7	576.9	757.98	679.38	Yes	No	PP 300 PLUS 3	99.55	PP 300 PLUS 3	99.55	Yes	ssft2_pp_large_wizard		yes
2021-05-07	Spiked	Before	1	All	Polymer Kit 1.0 PP	PP	Large	Wizard	14	1247.1	405.4	1117.8	656.15	Yes	No	PP 300 PLUS 5	99.76	PP 300 PLUS 5	99.76	Yes	ssft2_pp_large_wizard		yes
2021-05-07	Spiked	Before	1	All	Polymer Kit 1.0 PP	PP	Large	Wizard	15	1188	776.6	1245.53	775.69	Yes	No	PP 300 PLUS 4	99.21	PP 300 PLUS 4	99.21	Yes	ssft2_pp_large_wizard		yes
2021-05-07	Spiked	Before	1	All	Polymer Kit 1.0 PP	PP	Large	Wizard	16	0	0	541	352	Yes	No	PP300LUS_10	99.5	PP300LUS_10	99.5	Yes	ssft2_pp_large_wizard		yes
2021-05-07	Spiked	Before	1	All	Polymer Kit 1.0 PP	PP	Medium	Wizard	1,2,3	-	-	141.08	137.58	Yes	No	PP 53-100 3	96	PP 53-100 3	96	Yes	ssft2_pp_medium		yes
2021-05-07	Spiked	Before	1	All	Polymer Kit 1.0 PP	PP	Medium	Wizard	4	-	-	207.06	151.09	Yes	No	PP 53-100 3	95.27	PP 53-100 3	95.27	Yes	ssft2_pp_medium		yes
2021-05-07	Spiked	Before	1	All	Polymer Kit 1.0 PP	PP	Medium	Wizard	5	-	-	497.28	87.26	Yes	No	PP 53-100 3	98.45	PP 53-100 3	98.45	Yes	ssft2_pp_medium		yes
2021-05-07	Spiked	Before	1	All	Polymer Kit 1.0 PP	-	Medium	Wizard	6	-	-	34.11	14.62	No	No	Unidentified	0	Unidentified	0	Yes	ssft2_pp_medium		yes
2021-05-07	Spiked	Before	1	All	Polymer Kit 1.0 PP	PP	Medium	Wizard	7,8	-	-	495.61	221.49	Yes	No	PP 53-100 3	99.54	PP 53-100 3	99.54	Yes	ssft2_pp_medium		yes
2021-05-07	Spiked	Before	1	All	Polymer Kit 1.0 PP	PP	Medium	Wizard	9	-	-	380.98	231.97	Yes	No	PP 53-100 3	99.24	PP 53-100 3	99.24	Yes	ssft2_pp_medium		yes
2021-05-07	Spiked	Before	1	All	Polymer Kit 1.0 PP	PP	Medium	Wizard	10	-	-	411.04	215.96	Yes	No	PP_sigma_42789.6_d	99.32	PP_sigma_42789.6_d	99.32	Yes	ssft2_pp_medium		yes
2021-05-07	Spiked	Before	1	All	Polymer Kit 1.0 PP	PP	Medium	Wizard	11	-	-	310.2	190.26	Yes	No	PP 53-100 3	99.61	PP 53-100 3	99.61	Yes	ssft2_pp_medium		yes
2021-05-07	Spiked	Before	1	All	Polymer Kit 1.0 PP	-	Medium	Wizard	12	-	-	63.88	41.49	No	No	PP 53-100 3	92.09	PP 53-100 3	92.09	Yes	ssft2_pp_medium		no
2021-05-07	Spiked	Before	1	All	Polymer Kit 1.0 PP	PP	Medium	Wizard	13	-	-	227.39	107.67	Yes	No	PP 53-100 3	99.62	PP 53-100 3	99.62	Yes	ssft2_pp_medium		yes
2021-05-07	Spiked	Before	1	All	Polymer Kit 1.0 PP	-	Medium	Wizard	14	-	-	35.49	19.26	No	No	CPE_WhB_b	93.59	OLEFIN	95.53	Yes	ssft2_pp_medium		no
2021-05-07	Spiked	Before	1	All	Polymer Kit 1.0 PP	PP	Medium	Wizard	15	-	-	346.73	167.84	Yes	No	PP 53-100 5	99.61	PP 53-100 5	99.61	Yes	ssft2_pp_medium		yes
2021-05-07	Spiked	Before	1	All	Polymer Kit 1.0 PVC.1	PVC	Large	Wizard	1,2,3,9	142.5	96.4	1702.19	858.04	Yes	No	PVC300PLUS_1	92.82	PVC300PLUS_1	92.82	Yes	ssft2_pvc_large_wizard		yes
2021-05-07	Spiked	Before	1	All	Polymer Kit 1.0 PVC.1	PVC	Large	Wizard	4,5,6,7	47.5	12.7	1176.91	1011.55	Yes	No	PVC300PLUS_10	95.08	PVC300PLUS_10	95.08	Yes	ssft2_pvc_large_wizard		yes
2021-05-07	Spiked	Before	1	All	Polymer Kit 1.0 PVC.1	PVC	Large	Wizard	8,10,11	1337.9	325.6	1835.4	1509.41	Yes	No	PVC300PLUS_10	96.58	PVC300PLUS_10	96.58	Yes	ssft2_pvc_large_wizard		yes
2021-05-07	Spiked	Before	1	All	Polymer Kit 1.0 PVC.1	PVC	Large	Wizard	12	121.3	29.5	1679.21	1489.19	Yes	No	Unidentified	0	Unidentified	0	Yes	ssft2_pvc_large_wizard		yes
2021-05-07	Spiked	Before	1	All	Polymer Kit 1.0 PVC.1	PVC	Large	Wizard	13	137.1	20.4	1496.1	924.69	Yes	No	PVC300PLUS_1	87.36	PVC300PLUS_1	87.36	Yes	ssft2_pvc_large_wizard		yes
2021-05-07	Spiked	Before	1	All	Polymer Kit 1.0 PVC.1	PVC	Large	Wizard	14,15,16,20,21	1320.7	572.5	856.69	808.31	Yes	No	PVC 300 PLUS 4	98.7	PVC 300 PLUS 4	98.7	Yes	ssft2_pvc_large_wizard		yes
2021-05-07	Spiked	Before	1	All	Polymer Kit 1.0 PVC.1	PVC	Large	Wizard	17,18,19	179.3	50.6	1358.69	763.4	Yes	No	PVC300PLUS_1	93.38	PVC300PLUS_1	93.38	Yes	ssft2_pvc_large_wizard		yes
2021-05-07	Spiked	Before	1	All	Polymer Kit 1.0 PVC.1	PVC	Large	Wizard	22	521.4	128.9	1784.08	1593.1	Yes	No	Unidentified	0	Unidentified	0	Yes	ssft2_pvc_large_wizard		yes
2021-05-07	Spiked	Before	1	All	Polymer Kit 1.0 PVC.1	PVC	Large	Wizard	23,24,25	370.7	181.3	1386.02	1106.29	Yes	No	PVC300PLUS_1	94.91	PVC300PLUS_1	94.91	Yes	ssft2_pvc_large_wizard		yes
2021-05-07	Spiked	Before	1	All	Polymer Kit 1.0 PVC.1	-	Medium	Wizard	1	107.4	30.2	-	-	Yes	No	CRUMB RUBBER 53-100 4	84.23	CRUMB RUBBER 53-100 4	84.23	Yes	ssft2_pvc_medium_wizard	Scratch on slide	no
2021-05-07	Spiked	Before	1	All	Polymer Kit 1.0 PVC.1	PVC	Medium	Wizard	2	514.9	158.4	504.3	174.92	Yes	No	PVC 100-300 3	99.93	PVC 100-300 3	99.93	Yes	ssft2_pvc_medium_wizard		yes
2021-05-07	Spiked	Before	1	All	Polymer Kit 1.0 PVC.1	PVC	Medium	Wizard	3	573.6	211.8	555.43	153.28	Yes	No	PVC 100-300 1	99.72	PVC 100-300 1	99.72	Yes	ssft2_pvc_medium_wizard		yes
2021-05-07	Spiked	Before	1	All	Polymer Kit 1.0 PVC.1	PVC	Medium	Wizard	4	163.1	114	163.87	130.48	Yes	No	PVC 100-300 4	99.07	PVC 100-300 4	99.07	Yes	ssft2_pvc_medium_wizard		yes
2021-05-07	Spiked	Before	1	All	Polymer Kit 1.0 PVC.1	PVC	Medium	Wizard	5	217.5	100.4	223.04	164.85	Yes	No	PVC 53-100 3	97.93	PVC 53-100 3	97.93	Yes	ssft2_pvc_medium_wizard		yes
2021-05-07	Spiked	Before	1	All	Polymer Kit 1.0 PVC.1	PVC	Medium	Wizard	6	27.2	18.4	27.41	15.79	No	No	CA 300 PLUS 4	80.31	CA 300 PLUS 4	80.31	Yes	ssft2_pvc_medium_wizard	can only see in wizard and not point and shoot to get a matching spectra	no
2021-05-07	Spiked	Before	1	All	Polymer Kit 1.0 PVC.1	PVC	Medium	Wizard	7	354.2	236.9	354.01	263.37	Yes	No	PVC 100-300 1	99.9	PVC 100-300 1	99.9	Yes	ssft2_pvc_medium_wizard		yes
2021-05-07	Spiked	Before	1	All	Polymer Kit 1.0 PVC.1	PVC	Medium	Wizard	8	498.6	266	476	305.96	Yes	No	PVC 100-300 1	99.37	PVC 100-300 1	99.37	Yes	ssft2_pvc_medium_wizard		yes
2021-05-07	Spiked	Before	1	All	Polymer Kit 1.0 PVC.1	PVC	Medium	Wizard	9,10	54.4	38.1	222.67	119.91	Yes	No	PVC 53-100 3	94.51	PVC 53-100 3	94.51	Yes	ssft2_pvc_medium_wizard		yes
2021-05-07	Spiked	Before	1	All	Polymer Kit 1.0 PVC.1	PVC	Medium	Wizard	11	169.9	119.7	153.79	146.94	Yes	No	PVC 53-100 3	99.25	PVC 53-100 3	99.25	Yes	ssft2_pvc_medium_wizard		yes
2021-05-07	Spiked	Before	1	All	Polymer Kit 1.0 PVC.1	PVC	Medium	Wizard	12	34	22.9	166.44	146.03	Yes	No	PVC 53-100 3	97.86	PVC 53-100 3	97.86	Yes	ssft2_pvc_medium_wizard		yes
2021-05-07	Spiked	Before	1	All	Polymer Kit 1.0 PVC.1	PVC	Medium	Wizard	13	553.8	234.4	474.99	222.3	Yes	No	PVC 100-300 1	99.17	PVC 100-300 1	99.17	Yes	ssft2_pvc_medium_wizard		yes
2021-05-07	Spiked	Before	1	All	Polymer Kit 1.0 PVC.1	PVC	Medium	Wizard	14	510.8	215.1	452.88	206.52	Yes	No	PVC 100-300 2	99.46	PVC 100-300 2	99.46	Yes	ssft2_pvc_medium_wizard		yes
2021-05-07	Spiked	Before	1	All	Polymer Kit 1.0 PVC.1	PVC	Medium	Wizard	15,16	0	0	479.5	213.71	Yes	No	PVC 100-300 2	99.74	PVC 100-300 2	99.74	Yes	ssft2_pvc_medium_wizard		yes
2021-05-06	Spiked	Before	1	All	Polymer Kit 1.0 PS	PS	Large	Wizard	1	617.1	377.8	592.84	494.3	Yes	No	PS_CI_hard_b	95.14	PS_CI_hard_b	95.14	Yes	ssft2_ps_large_wizard		yes
2021-05-06	Spiked	Before	1	All	Polymer Kit 1.0 PS	PS	Large	Wizard	2	1044.8	614.5	930.14	610.07	Yes	No	PS 300 PLUS 3	90.04	PS 300 PLUS 3	90.04	Yes	ssft2_ps_large_wizard		yes
2021-05-06	Spiked	Before	1	All	Polymer Kit 1.0 PS	PS	Large	Wizard	3,4	75.3	20.1	478.8	427.41	Yes	No	PS_CI_hard_b	98.18	PS_CI_hard_b	98.18	Yes	ssft2_ps_large_wizard		yes
2021-05-06	Spiked	Before	1	All	Polymer Kit 1.0 PS	PS	Large	Wizard	5	792.7	515.6	773.48	622	Yes	No	PS 300 PLUS 3	89.21	PS 300 PLUS 3	89.21	Yes	ssft2_ps_large_wizard		yes
2021-05-06	Spiked	Before	1	All	Polymer Kit 1.0 PS	PS	Large	Wizard	6	568.9	356.6	545.62	540.27	Yes	No	PS 300 PLUS 2	99.23	PS 300 PLUS 2	99.23	Yes	ssft2_ps_large_wizard		yes
2021-05-06	Spiked	Before	1	All	Polymer Kit 1.0 PS	PS	Large	Wizard	7	615.1	334.3	584.1	395.11	Yes	No	PS 300 PLUS 3	98.5	PS 300 PLUS 3	98.5	Yes	ssft2_ps_large_wizard		yes
2021-05-06	Spiked	Before	1	All	Polymer Kit 1.0 PS	PS	Large	Wizard	8	299.7	206.9	439.89	377	Yes	No	PS300PLUS_6	99.57	PS300PLUS_6	99.57	Yes	ssft2_ps_large_wizard		yes
2021-05-06	Spiked	Before	1	All	Polymer Kit 1.0 PS	PS	Large	Wizard	9	964.4	603.4	899.79	621.04	Yes	No	PS300PLUS_10	93.32	PS300PLUS_10	93.32	Yes	ssft2_ps_large_wizard		yes
2021-05-06	Spiked	Before	1	All	Polymer Kit 1.0 PS	PS	Large	Wizard	10	787.3	336	777.46	486.76	Yes	No	PS 300 PLUS 2	99.72	PS 300 PLUS 2	99.72	Yes	ssft2_ps_large_wizard		yes
2021-05-06	Spiked	Before	1	All	Polymer Kit 1.0 PS	PS	Large	Wizard	11	0	0	543.69	366.26	Yes	No	PS300PLUS_10	99.12	PS300PLUS_10	99.12	Yes	ssft2_ps_large_wizard		yes
2021-05-07	Spiked	Before	1	All	Polymer Kit 1.0 PS	PS	Medium	Wizard	1	-	-	355.9	283.38	Yes	No	PS300PLUS_8	99.92	PS300PLUS_8	99.92	Yes	ssft2_ps_medium_wizard	original length and width not recorded	yes
2021-05-07	Spiked	Before	1	All	Polymer Kit 1.0 PS	PS	Medium	Wizard	2	-	-	292.92	96.28	Yes	No	PS_GFPOWDER_SS2_1	99.42	PS_GFPOWDER_SS2_1	99.42	Yes	ssft2_ps_medium_wizard	original length and width not recorded	yes
2021-05-07	Spiked	Before	1	All	Polymer Kit 1.0 PS	PS	Medium	Wizard	3,4	-	-	226.08	127.69	Yes	No	PS_GFPOWDER_SS2_5	99.57	PS_GFPOWDER_SS2_5	99.57	Yes	ssft2_ps_medium_wizard	original length and width not recorded	yes
2021-05-07	Spiked	Before	1	All	Polymer Kit 1.0 PS	PS	Medium	Wizard	5	-	-	206.59	157.72	Yes	No	PS_GFPOWDER_SS2_1	99.29	PS_GFPOWDER_SS2_1	99.29	Yes	ssft2_ps_medium_wizard	original length and width not recorded	yes
2021-05-07	Spiked	Before	1	All	Polymer Kit 1.0 PS	PS	Medium	Wizard	6	-	-	251.61	188.08	Yes	No	PS 100-300 5	99.36	PS 100-300 5	99.36	Yes	ssft2_ps_medium_wizard	original length and width not recorded	yes
2021-05-07	Spiked	Before	1	All	Polymer Kit 1.0 PS	PS	Medium	Wizard	7	-	-	147.35	102.34	Yes	No	PS_GFPOWDER_SS2_5	98.57	PS_GFPOWDER_SS2_5	98.57	Yes	ssft2_ps_medium_wizard	original length and width not recorded	yes
2021-05-07	Spiked	Before	1	All	Polymer Kit 1.0 PS	PS	Medium	Wizard	8	-	-	333.15	259.47	Yes	No	PS 100-300 5	99.66	PS 100-300 5	99.66	Yes	ssft2_ps_medium_wizard	original length and width not recorded	yes
2021-05-07	Spiked	Before	1	All	Polymer Kit 1.0 PS	PS	Medium	Wizard	9	-	-	231.84	176.58	Yes	No	PS_GFPOWDER_SS2_1	99.23	PS_GFPOWDER_SS2_1	99.23	Yes	ssft2_ps_medium_wizard	original length and width not recorded	yes
2021-05-07	Spiked	Before	1	All	Polymer Kit 1.0 PS	PS	Medium	Wizard	10	-	-	111.33	67.74	Yes	No	PS_GFPOWDER_SS2_4	99.24	PS_GFPOWDER_SS2_4	99.24	Yes	ssft2_ps_medium_wizard	original length and width not recorded	yes
2021-05-07	Spiked	Before	1	All	Polymer Kit 1.0 PS	PS	Medium	Wizard	11	-	-	201.65	178.73	Yes	No	PS_GFPOWDER_SS2_3	99.32	PS_GFPOWDER_SS2_3	99.32	Yes	ssft2_ps_medium_wizard	original length and width not recorded	yes
2021-05-07	Spiked	Before	1	All	Polymer Kit 1.0 PS	PS	Medium	Wizard	12	-	-	208.76	143.73	Yes	No	PS_GFPOWDER_SS2_3	99.29	PS_GFPOWDER_SS2_3	99.29	Yes	ssft2_ps_medium_wizard	original length and width not recorded	yes
2021-05-07	Spiked	Before	1	All	Polykit 1.0 PA6	Nylon	Large	Wizard	1,2	107	37.8	362.63	132.71	Yes	No	NYLON 100-300 3	98.1	NYLON 100-300 3	98.1	Yes	ssft2_ny_large_wizard		yes
2021-05-07	Spiked	Before	1	All	Polykit 1.0 PA6	Nylon	Large	Wizard	3,4	315.1	143.7	449.07	405.6	Yes	No	NYLON6300PLUS_7	98.78	NYLON6300PLUS_7	98.78	Yes	ssft2_ny_large_wizard		yes
2021-05-07	Spiked	Before	1	All	Polykit 1.0 PA6	Nylon	Large	Wizard	5	979.3	547	964.92	512.5	Yes	No	NYLON 300 PLUS 2	95.2	NYLON 300 PLUS 2	95.2	Yes	ssft2_ny_large_wizard		yes
2021-05-07	Spiked	Before	1	All	Polykit 1.0 PA6	Nylon	Large	Wizard	6,7	1151.3	710.2	1049.44	666.02	Yes	No	NYLON 300 PLUS 1	98.04	NYLON 300 PLUS 1	98.04	Yes	ssft2_ny_large_wizard		yes
2021-05-07	Spiked	Before	1	All	Polykit 1.0 PA6	Nylon	Large	Wizard	8	1010.2	616.1	811.31	769.67	Yes	No	NYLON6300PLUS_7	99.43	NYLON6300PLUS_7	99.43	Yes	ssft2_ny_large_wizard		yes
2021-05-07	Spiked	Before	1	All	Polykit 1.0 PA6	Nylon	Large	Wizard	9	1084.1	827.6	973.01	853.42	Yes	No	NYLON 300 PLUS 2	94.8	NYLON 300 PLUS 2	94.8	Yes	ssft2_ny_large_wizard		yes
2021-05-07	Spiked	Before	1	All	Polykit 1.0 PA6	Nylon	Large	Wizard	10	346.2	223.1	345.63	264.64	Yes	No	NYLON 100-300 2	99.73	NYLON 100-300 2	99.73	Yes	ssft2_ny_large_wizard		yes
2021-05-07	Spiked	Before	1	All	Polykit 1.0 PA6	Nylon	Large	Wizard	11	623.5	266.1	565.44	284.95	Yes	No	NYLON 300 PLUS 4	99.56	NYLON 300 PLUS 4	99.56	Yes	ssft2_ny_large_wizard		yes
2021-05-07	Spiked	Before	1	All	Polykit 1.0 PA6	Nylon	Large	Wizard	12	22.6	22.4	176.86	149.99	Yes	No	NYLON 100-300 4	97.83	NYLON 100-300 4	97.83	Yes	ssft2_ny_large_wizard		yes
2021-05-07	Spiked	Before	1	All	Polykit 1.0 PA6	Nylon	Large	Wizard	13,14	135.5	33	464.82	45.78	Yes	No	NYLON 100-300 5	94.44	NYLON 100-300 5	94.44	Yes	ssft2_ny_large_wizard		yes
2021-05-07	Spiked	Before	1	All	Polykit 1.0 PA6	Nylon	Large	Wizard	15	67.7	42.6	344.17	183.73	Yes	No	NYLON 100-300 5	98.09	NYLON 100-300 5	98.09	Yes	ssft2_ny_large_wizard		yes
2021-05-07	Spiked	Before	1	All	Polykit 1.0 PA6	Nylon	Large	Wizard	16	550.6	302.1	531.07	396.25	Yes	No	NYLON 300 PLUS 2	99.5	NYLON 300 PLUS 2	99.5	Yes	ssft2_ny_large_wizard		yes
2021-05-07	Spiked	Before	1	All	Polykit 1.0 PA6	Nylon	Large	Wizard	17	860.8	481.6	790.46	718.9	Yes	No	NYLON 300 PLUS 1	98.08	NYLON 300 PLUS 1	98.08	Yes	ssft2_ny_large_wizard		yes
2021-05-07	Spiked	Before	1	All	Polykit 1.0 PA6	Nylon	Large	Wizard	18	0	0	756	711.25	Yes	No	NYLON 300 PLUS 1	99.53	NYLON 300 PLUS 1	99.53	Yes	ssft2_ny_large_wizard		yes
2021-05-07	Spiked	Before	1	All	Polykit 1.0 PA6	-	Medium	Wizard	1,2,3,4,5	3436.1	140.1	-	-	Yes	No	CRUMB RUBBER 53-100 4	85.79	CRUMB RUBBER 53-100 4	85.79	no	ssft2_ny_medium_wizard	sharpie boarder of box, not a m.p. particle	no
2021-05-07	Spiked	Before	1	All	Polykit 1.0 PA6	Nylon	Medium	Wizard	6	278.9	92	263.54	139.79	Yes	No	NYLON 100-300 1	98.69	NYLON 100-300 1	98.69	Yes	ssft2_ny_medium_wizard		yes
2021-05-07	Spiked	Before	1	All	Polykit 1.0 PA6	Nylon	Medium	Wizard	7,8	55.9	35.8	371.42	210.69	Yes	No	NYLON 100-300 1	98.02	NYLON 100-300 1	98.02	Yes	ssft2_ny_medium_wizard		yes
2021-05-07	Spiked	Before	1	All	Polykit 1.0 PA6	Nylon	Medium	Wizard	9,10,11	57.8	34.4	383.51	254.45	Yes	No	NYLON 100-300 2	98.6	NYLON 100-300 2	98.6	Yes	ssft2_ny_medium_wizard		yes
2021-05-07	Spiked	Before	1	All	Polykit 1.0 PA6	Nylon	Medium	Wizard	12,13,14	97.3	54.3	350.97	265.04	Yes	No	NYLON 100-300 1	97.77	NYLON 100-300 1	97.77	Yes	ssft2_ny_medium_wizard		yes
2021-05-07	Spiked	Before	1	All	Polykit 1.0 PA6	Nylon	Medium	Wizard	15,16	76.8	34.2	434.16	260.76	Yes	No	NYLON 100-300 2	99.76	NYLON 100-300 2	99.76	Yes	ssft2_ny_medium_wizard		yes
2021-05-07	Spiked	Before	1	All	Polykit 1.0 PA6	Nylon	Medium	Wizard	17,20	172.9	84.2	452.67	164.66	Yes	No	NYLON 300 PLUS 4	98.15	NYLON 300 PLUS 4	98.15	Yes	ssft2_ny_medium_wizard		yes
2021-05-07	Spiked	Before	1	All	Polykit 1.0 PA6	Nylon	Medium	Wizard	18,19	58.4	32.7	445.2	227.74	Yes	No	NYLON 100-300 1	97.19	NYLON 100-300 1	97.19	Yes	ssft2_ny_medium_wizard		yes
2021-05-07	Spiked	Before	1	All	Polykit 1.0 PA6	-	Medium	Point and Shoot	7	-	-	351.36	249.26	Yes	No	nYLON6300PLUS_5	95.93	nYLON6300PLUS_5	95.93	Yes	ssft2_ny_medium_wizard	not counted on wizard, top right corner	no
2021-05-07	Spiked	Before	1	All	Polykit 1.0 PA6	Nylon	Medium	Wizard	XX			267.04	68.32	Yes	No					Yes	ssft2_ny_medium_wizard		yes
2021-05-06	Spiked	Before	1	All	Polymer Kit 1.0 HDPE.1	HDPE	Large	Wizard	1,2,3	159.4	85.1	701.05	330.51	Yes	No	PE_GF_powder_e	96.08	PE_GF_powder_e	96.08	Yes	ssft2_hdpe_large_wizard		yes
2021-05-06	Spiked	Before	1	All	Polymer Kit 1.0 HDPE.1	HDPE	Large	Wizard	4	1158.4	723.2	1151.65	608.09	Yes	No	HDPE300PLUS_7	98.35	HDPE300PLUS_7	98.35	Yes	ssft2_hdpe_large_wizard		yes
2021-05-06	Spiked	Before	1	All	Polymer Kit 1.0 HDPE.1	HDPE	Large	Wizard	5	75.9	42.5	100.42	49.18	Yes	No	PE_GF_POWDER_SS1_4	84.53	PE_GF_POWDER_SS1_4	84.53	Yes	ssft2_hdpe_large_wizard		yes
2021-05-06	Spiked	Before	1	All	Polymer Kit 1.0 HDPE.1	HDPE	Large	Wizard	6,7	298.8	52.6	1736.45	767.16	Yes	No	HDPE 100-300 1	97.65	HDPE 100-300 1	97.65	Yes	ssft2_hdpe_large_wizard		yes
2021-05-06	Spiked	Before	1	All	Polymer Kit 1.0 HDPE.1	HDPE	Large	Wizard	8	1497.2	295.1	903.22	293.14	Yes	No	HDPE 300 PLUS 4	97.61	HDPE 300 PLUS 4	97.61	Yes	ssft2_hdpe_large_wizard		yes
2021-05-06	Spiked	Before	1	All	Polymer Kit 1.0 HDPE.1	HDPE	Large	Wizard	9	744.1	605.6	718.84	634.14	Yes	No	HDPE 300 PLUS 3	98.19	HDPE 300 PLUS 3	98.19	Yes	ssft2_hdpe_large_wizard		yes
2021-05-06	Spiked	Before	1	All	Polymer Kit 1.0 HDPE.1	HDPE	Large	Wizard	10,11	1298	944.9	1255.93	1010.08	Yes	No	HDPE300PLUS_7	90.87	HDPE300PLUS_7	90.87	Yes	ssft2_hdpe_large_wizard		yes
2021-05-06	Spiked	Before	1	All	Polymer Kit 1.0 HDPE.1	HDPE	Large	Wizard	12	984.2	669.8	931.93	861.71	Yes	No	HDPE 300 PLUS 1	97.08	HDPE 300 PLUS 1	97.08	Yes	ssft2_hdpe_large_wizard		yes
2021-05-06	Spiked	Before	1	All	Polymer Kit 1.0 HDPE.1	HDPE	Large	Wizard	13,14	45.5	30.6	1524.14	1251.09	Yes	No	HDPE 300 PLUS 2	97.11	HDPE 300 PLUS 2	97.11	Yes	ssft2_hdpe_large_wizard		yes
2021-05-06	Spiked	Before	1	All	Polymer Kit 1.0 HDPE.1	HDPE	Large	Wizard	15,16	0	0	1574.04	869.94	Yes	No	PE_GF_powder_e	92.64	PE_GF_powder_e	92.64	Yes	ssft2_hdpe_large_wizard		yes
2021-05-10	Spiked	Before	1	All	Polymer Kit 1.0 HDPE.1	HDPE	Medium	Wizard	1,2	37.3	25.7	412.39	129.99	Yes	No	PE_GF_POWDER_SS1_3	98.91	PE_GF_POWDER_SS1_3	98.91	Yes	ssft2_hdpe_medium_wizard		yes
2021-05-10	Spiked	Before	1	All	Polymer Kit 1.0 HDPE.1	HDPE	Medium	Wizard	3	292	126.9	288.48	89.78	Yes	No	PE_GF_POWDER_SS1_3	98.84	PE_GF_POWDER_SS1_3	98.84	Yes	ssft2_hdpe_medium_wizard		yes
2021-05-10	Spiked	Before	1	All	Polymer Kit 1.0 HDPE.1	-	Medium	Wizard	4,5,6,7,8,9,10,11,12,13,14	63.5	24.9	-	-	Yes	No	Unidentified	0	Unidentified	0	Yes	ssft2_hdpe_medium_wizard	sharpie boarder	no
2021-05-10	Spiked	Before	1	All	Polymer Kit 1.0 HDPE.1	HDPE	Medium	Wizard	15	415.5	234.3	410.59	223.37	Yes	No	PE_GF_powder_e	99.72	PE_GF_powder_e	99.72	Yes	ssft2_hdpe_medium_wizard		yes
2021-05-10	Spiked	Before	1	All	Polymer Kit 1.0 HDPE.1	HDPE	Medium	Wizard	16	317.3	232.4	281.48	230.86	Yes	No	PE_GF_powder_e	99.72	PE_GF_powder_e	99.72	Yes	ssft2_hdpe_medium_wizard		yes
2021-05-10	Spiked	Before	1	All	Polymer Kit 1.0 HDPE.1	HDPE	Medium	Wizard	17	621.5	198.2	469.95	273.94	Yes	No	PE_GF_powder_e	99.16	PE_GF_powder_e	99.16	Yes	ssft2_hdpe_medium_wizard		yes
2021-05-10	Spiked	Before	1	All	Polymer Kit 1.0 HDPE.1	HDPE	Medium	Wizard	18	548.7	186.4	496.72	216.13	Yes	No	PE_GF_powder_e	99.69	PE_GF_powder_e	99.69	Yes	ssft2_hdpe_medium_wizard		yes
2021-05-10	Spiked	Before	1	All	Polymer Kit 1.0 HDPE.1	HDPE	Medium	Wizard	19	41.1	13.4	-	-	Yes	No	Unidentified	0	Unidentified	0	Yes	ssft2_hdpe_medium_wizard		yes
2021-05-10	Spiked	Before	1	All	Polymer Kit 1.0 HDPE.1	HDPE	Medium	Wizard	20	211.4	129.8	209.89	147.03	Yes	No	CPE_WhB_a	98.84	CPE_WhB_a	98.84	Yes	ssft2_hdpe_medium_wizard		yes
2021-05-10	Spiked	Before	1	All	Polymer Kit 1.0 HDPE.1	HDPE	Medium	Wizard	21	288.5	185.9	270.4	150.86	Yes	No	PE_GF_powder_d	99.64	PE_GF_powder_d	99.64	Yes	ssft2_hdpe_medium_wizard		yes
2021-05-10	Spiked	Before	1	All	Polymer Kit 1.0 HDPE.1	HDPE	Medium	Wizard	22	265.8	184	234.61	177.91	Yes	No	PE_GF_POWDER_SS1_3	99.33	PE_GF_POWDER_SS1_3	99.33	Yes	ssft2_hdpe_medium_wizard		yes
2021-05-10	Spiked	Before	1	All	Polymer Kit 1.0 HDPE.1	HDPE	Medium	Wizard	23	0	0	355.26	199.78	Yes	No	PE_GF_powder_d	99.4	PE_GF_powder_d	99.4	Yes	ssft2_hdpe_medium_wizard		yes
2021-05-06	Spiked	Before	1	All	Polymer Kit 1.0 CR	CR	Large	Wizard	1	1678	1012.9	1570.8	1214.01	Yes	No	CRUMB RUBBER 300 PLUS 3	98.37	CRUMB RUBBER 300 PLUS 3	98.37	Yes	ssft2_CR_large_wizard		yes
2021-05-06	Spiked	Before	1	All	Polymer Kit 1.0 CR	CR	Large	Wizard	2	36.3	28.3	40.81	25.83	No	No	CRUMB RUBBER 53-100 2	91.81	CRUMB RUBBER 53-100 2	91.81	Yes	ssft2_CR_large_wizard		yes
2021-05-06	Spiked	Before	1	All	Polymer Kit 1.0 CR	CR	Large	Wizard	3	54.5	35.1	68.84	41.54	No	No	CRUMB RUBBER 53-100 PLUS 1	98.16	CRUMB RUBBER 53-100 PLUS 1	98.16	Yes	ssft2_CR_large_wizard		yes
2021-05-06	Spiked	Before	1	All	Polymer Kit 1.0 CR	CR	Large	Wizard	4	1613.7	1299	1495.43	1235.23	Yes	No	PETG_ND_a	97.16	PETG_ND_a	97.16	Yes	ssft2_CR_large_wizard		yes
2021-05-06	Spiked	Before	1	All	Polymer Kit 1.0 CR	CR	Large	Wizard	5	1640.3	1221.8	1597.37	1026.56	Yes	No	CR300PLUS_6	97.79	CR300PLUS_6	97.79	Yes	ssft2_CR_large_wizard		yes
2021-05-06	Spiked	Before	1	All	Polymer Kit 1.0 CR	CR	Large	Wizard	6	1501.1	809.2	1356.58	728.89	Yes	No	CR300PLUS_7	98.61	CR300PLUS_7	98.61	Yes	ssft2_CR_large_wizard		yes
2021-05-06	Spiked	Before	1	All	Polymer Kit 1.0 CR	CR	Large	Wizard	7	2015.2	1268.1	1831.87	1129.49	Yes	No	CR300PLUS_6	97.8	CR300PLUS_6	97.8	Yes	ssft2_CR_large_wizard		yes
2021-05-06	Spiked	Before	1	All	Polymer Kit 1.0 CR	CR	Large	Wizard	8	1927.7	1494.5	1840.49	1482.89	Yes	No	PETG_ND_a	96.44	PETG_ND_a	96.44	Yes	ssft2_CR_large_wizard		yes
2021-05-06	Spiked	Before	1	All	Polymer Kit 1.0 CR	CR	Large	Wizard	9	1564.6	1101.6	1429.17	1180.49	Yes	No	CRUMB RUBBER 300 PLUS 4	97.32	CRUMB RUBBER 300 PLUS 4	97.32	Yes	ssft2_CR_large_wizard		yes
2021-05-06	Spiked	Before	1	All	Polymer Kit 1.0 CR	CR	Large	Wizard	10	2590.6	774.8	2467.68	944.52	Yes	No	CR300PLUS_7	99.26	CR300PLUS_7	99.26	Yes	ssft2_CR_large_wizard		yes
2021-05-06	Spiked	Before	1	All	Polymer Kit 1.0 CR	CR	Large	Wizard	11	1646.4	1221.4	1480.44	1180.75	Yes	No	CR300PLUS_6	98.75	CR300PLUS_6	98.75	Yes	ssft2_CR_large_wizard		yes
2021-05-06	Spiked	Before	1	All	Polymer Kit 1.0 CR	CR	Large	Wizard	12	1381.2	856.4	1272.51	689.48	Yes	No	CRUMB RUBBER 300 PLUS 5	97.69	CRUMB RUBBER 300 PLUS 5	97.69	Yes	ssft2_CR_large_wizard		yes
2021-05-06	Spiked	Before	1	All	Polymer Kit 1.0 CR	CR	Large	Wizard	13	0	0	55.73	41.54	No	No	CRUMB RUBBER 53-100 PLUS 1	97.8	CRUMB RUBBER 53-100 PLUS 1	97.8	Yes	ssft2_CR_large_wizard		yes
2021-05-10	Spiked	Before	1	All	Polymer Kit 1.0 CR	CR	Medium	Wizard	1	129.6	72.1	100.36	36.41	Yes	No	CR300PLUS_9	94.29	CR300PLUS_9	94.29	Yes	ssft2_CR_medium_wizard		yes
2021-05-10	Spiked	Before	1	All	Polymer Kit 1.0 CR	CR	Medium	Wizard	2	34.4	21.7	42.16	24.17	No	No	CRUMB RUBBER 53-100 5	87.61	CRUMB RUBBER 53-100 5	87.61	Yes	ssft2_CR_medium_wizard		yes
2021-05-10	Spiked	Before	1	All	Polymer Kit 1.0 CR	CR	Medium	Wizard	3	56.3	40.7	55.02	37.03	No	No	CRUMB RUBBER 53-100 4	98.6	CRUMB RUBBER 53-100 4	98.6	Yes	ssft2_CR_medium_wizard		yes
2021-05-10	Spiked	Before	1	All	Polymer Kit 1.0 CR	CR	Medium	Wizard	4	66.3	34	61.94	34.1	No	No	CRUMB RUBBER 53-100 4	98.74	CRUMB RUBBER 53-100 4	98.74	Yes	ssft2_CR_medium_wizard		yes
2021-05-10	Spiked	Before	1	All	Polymer Kit 1.0 CR	CR	Medium	Wizard	5	156.4	93.6	135.22	79.63	Yes	No	CR300PLUS_9	97.8	CR300PLUS_9	97.8	Yes	ssft2_CR_medium_wizard		yes
2021-05-10	Spiked	Before	1	All	Polymer Kit 1.0 CR	CR	Medium	Wizard	6	133.9	58.4	136.4	58.36	Yes	No	CRUMB RUBBER 53-100 4	98.99	CRUMB RUBBER 53-100 4	98.99	Yes	ssft2_CR_medium_wizard		yes
2021-05-10	Spiked	Before	1	All	Polymer Kit 1.0 CR	CR	Medium	Wizard	7	88.9	52.7	85.28	60.99	No	No	CRUMB RUBBER 53-100 4	98.73	CRUMB RUBBER 53-100 4	98.73	Yes	ssft2_CR_medium_wizard		yes
2021-05-10	Spiked	Before	1	All	Polymer Kit 1.0 CR	CR	Medium	Wizard	8	228.4	148.4	228.28	174.34	Yes	No	CRUMB RUBBER 53-100 PLUS 1	97.5	CRUMB RUBBER 53-100 PLUS 1	97.5	Yes	ssft2_CR_medium_wizard		yes
2021-05-10	Spiked	Before	1	All	Polymer Kit 1.0 CR	CR	Medium	Wizard	9	162.7	99	121.23	107.68	Yes	No	CR300PLUS_9	98.78	CR300PLUS_9	98.78	Yes	ssft2_CR_medium_wizard		yes
2021-05-10	Spiked	Before	1	All	Polymer Kit 1.0 CR	CR	Medium	Wizard	10	419.2	141.3	397.29	181.67	Yes	No	CR300PLUS_9	98.33	CR300PLUS_9	98.33	Yes	ssft2_CR_medium_wizard		yes
2021-05-10	Spiked	Before	1	All	Polymer Kit 1.0 CR	CR	Medium	Wizard	11	357.8	104.3	198.82	153.58	Yes	No	CR300PLUS_9	98	CR300PLUS_9	98	Yes	ssft2_CR_medium_wizard		yes
2021-05-10	Spiked	Before	1	All	Polymer Kit 1.0 CR	CR	Medium	Wizard	12	43.8	32.1	43.66	37.49	No	No	CRUMB RUBBER 53-100 4	98.83	CRUMB RUBBER 53-100 4	98.83	Yes	ssft2_CR_medium_wizard		yes
2021-05-10	Spiked	Before	1	All	Polymer Kit 1.0 CR	CR	Medium	Wizard	13	114.8	57.4	112.84	53.4	Yes	No	CRUMB RUBBER 53-100 4	99.09	CRUMB RUBBER 53-100 4	99.09	Yes	ssft2_CR_medium_wizard		yes
2021-05-10	Spiked	Before	1	All	Polymer Kit 1.0 CR	CR	Medium	Wizard	14	114.7	58	105.92	58.62	Yes	No	CRUMB RUBBER 53-100 4	99.01	CRUMB RUBBER 53-100 4	99.01	Yes	ssft2_CR_medium_wizard		yes
2021-05-10	Spiked	Before	1	All	Polymer Kit 1.0 CR	CR	Medium	Wizard	15	359.3	129.6	218.46	138.05	Yes	No	CRUMB RUBBER 53-100 3	90.82	CRUMB RUBBER 53-100 3	90.82	Yes	ssft2_CR_medium_wizard		yes
2021-05-10	Spiked	Before	1	All	Polymer Kit 1.0 CR	CR	Medium	Wizard	16	66	41.5	69.78	48.44	No	No	CRUMB RUBBER 53-100 4	98.58	CRUMB RUBBER 53-100 4	98.58	Yes	ssft2_CR_medium_wizard		yes
2021-05-10	Spiked	Before	1	All	Polymer Kit 1.0 CR	CR	Medium	Wizard	17	65.7	24.7	82.99	29.45	No	No	CRUMB RUBBER 53-100 4	98.33	CRUMB RUBBER 53-100 4	98.33	Yes	ssft2_CR_medium_wizard		yes
2021-05-10	Spiked	Before	1	All	Polymer Kit 1.0 CR	CR	Medium	Wizard	18	208.8	100.3	194.15	80.49	Yes	No	CRUMB RUBBER 53-100 PLUS 1	98.52	CRUMB RUBBER 53-100 PLUS 1	98.52	Yes	ssft2_CR_medium_wizard		yes
2021-05-10	Spiked	Before	1	All	Polymer Kit 1.0 CR	CR	Medium	Wizard	19	46.9	22.8	52.59	25.05	No	No	CRUMB RUBBER 53-100 4	97.93	CRUMB RUBBER 53-100 4	97.93	Yes	ssft2_CR_medium_wizard		yes
2021-05-10	Spiked	Before	1	All	Polymer Kit 1.0 CR	CR	Medium	Wizard	20	67.4	44	69.48	42.75	No	No	CRUMB RUBBER 53-100 4	98.81	CRUMB RUBBER 53-100 4	98.81	Yes	ssft2_CR_medium_wizard		yes
2021-05-10	Spiked	Before	1	All	Polymer Kit 1.0 CR	CR	Medium	Wizard	21	33.8	18.4	47.91	15.89	No	No	CRUMB RUBBER 53-100 4	97.6	CRUMB RUBBER 53-100 4	97.6	Yes	ssft2_CR_medium_wizard		yes
2021-05-10	Spiked	Before	1	All	Polymer Kit 1.0 CR	CR	Medium	Wizard	22	178.3	91.2	175.26	85.04	Yes	No	CRUMB RUBBER 53-100 4	98.93	CRUMB RUBBER 53-100 4	98.93	Yes	ssft2_CR_medium_wizard		yes
2021-05-10	Spiked	Before	1	All	Polymer Kit 1.0 CR	CR	Medium	Wizard	23	0	0	52.94	49.43	No	No	CRUMB RUBBER 53-100 4	98.98	CRUMB RUBBER 53-100 4	98.98	Yes	ssft2_CR_medium_wizard		yes
2021-05-10	Spiked	Before	1	All	Polymer Kit 1.0 PEST	PEST	Fiber	Point and Shoot	1	-	-	3135	27	Yes	Yes	Polyester_150_FibLib_a	97.87	Polyester_150_FibLib_a	97.87	Yes	ssft2_poly_fine_p&s		yes
2021-05-10	Spiked	Before	1	All	Polymer Kit 1.0 PEST	PEST	Fiber	Point and Shoot	2	-	-	3416	15	Yes	Yes	PEST_JK_Fiber_a	97.94	PEST_JK_Fiber_a	97.94	Yes	ssft2_poly_fine_p&s		yes
2021-05-10	Spiked	Before	1	All	Polymer Kit 1.0 PEST	PEST	Fiber	Point and Shoot	3	-	-	1483	25	Yes	Yes	POLYESTER FINE 4	98.74	POLYESTER FINE 4	98.74	Yes	ssft2_poly_fine_p&s	3 and 5 might be same piece	yes
2021-05-10	Spiked	Before	1	All	Polymer Kit 1.0 PEST	PEST	Fiber	Point and Shoot	4	-	-	2314	23	Yes	Yes	POLYESTER FINE 4	98.25	POLYESTER FINE 4	98.25	Yes	ssft2_poly_fine_p&s		yes
2021-05-10	Spiked	Before	1	All	Polymer Kit 1.0 PEST	PEST	Fiber	Point and Shoot	5	-	-	779	30	Yes	Yes	Polyester_150_FibLib_b	95.97	Polyester_150_FibLib_b	95.97	Yes	ssft2_poly_fine_p&s		yes
2021-05-10	Spiked	Before	1	All	Polymer Kit 1.0 PEST	PEST	Fiber	Point and Shoot	6	-	-	2015	16	Yes	Yes	PEST_JML_Paisley_d	91.93	PEST_JML_Paisley_d	91.93	Yes	ssft2_poly_fine_p&s		yes
2021-05-10	Spiked	Before	1	All	Polymer Kit 1.0 PEST	PEST	Fiber	Point and Shoot	7	-	-	3299	17	Yes	Yes	POLYESTER FINE 1	91.76	POLYESTER FINE 1	91.76	Yes	ssft2_poly_fine_p&s		yes
2021-05-10	Spiked	Before	1	All	Polymer Kit 1.0 PEST	PEST	Fiber	Point and Shoot	8	-	-	2852	17	Yes	Yes	POLYESTER FINE 5	97.12	POLYESTER FINE 5	97.12	Yes	ssft2_poly_fine_p&s		yes
2021-05-10	Spiked	Before	1	All	Polymer Kit 1.0 PEST	PEST	Fiber	Point and Shoot	9	-	-	761	19	Yes	Yes	POLYESTER FINE 4	96.03	POLYESTER FINE 4	96.03	Yes	ssft2_poly_fine_p&s		yes
2021-05-10	Spiked	Before	1	All	Top Premium King Size CA Cigarette Filters	CA	Fiber	Point and Shoot	1	-	-	4474	28	Yes	Yes	CELLULOSE ACETATE FIBER 2	97.63	CELLULOSE ACETATE FIBER 2	97.63	Yes	ssft2_ca_strands_p&s		yes
2021-05-10	Spiked	Before	1	All	Top Premium King Size CA Cigarette Filters	CA	Fiber	Point and Shoot	2	-	-	1573	27	Yes	Yes	CA 300 PLUS 6	97.42	CA 300 PLUS 6	97.42	Yes	ssft2_ca_strands_p&s		yes
2021-05-10	Spiked	Before	1	All	Top Premium King Size CA Cigarette Filters	CA	Fiber	Point and Shoot	3	-	-	3522	37	Yes	Yes	CA 300 PLUS 1	91	CA 300 PLUS 1	91	Yes	ssft2_ca_strands_p&s		yes
2021-05-10	Spiked	Before	1	All	Top Premium King Size CA Cigarette Filters	CA	Fiber	Point and Shoot	4	-	-	640	41	Yes	Yes	CELLULOSE ACETATE FIBER 2	98.2	CELLULOSE ACETATE FIBER 2	98.2	Yes	ssft2_ca_strands_p&s		yes
2021-05-10	Spiked	Before	1	All	Top Premium King Size CA Cigarette Filters	CA	Fiber	Point and Shoot	5	-	-	658	30	Yes	Yes	CA 300 PLUS 2	98.32	CA 300 PLUS 2	98.32	Yes	ssft2_ca_strands_p&s		yes
2021-05-10	Spiked	Before	1	All	Top Premium King Size CA Cigarette Filters	CA	Fiber	Point and Shoot	6	-	-	1335	35	Yes	Yes	CELLULOSE ACETATE FIBER 4	98.88	CELLULOSE ACETATE FIBER 4	98.88	Yes	ssft2_ca_strands_p&s		yes
2021-05-10	Spiked	Before	1	All	Top Premium King Size CA Cigarette Filters	CA	Fiber	Point and Shoot	7	-	-	2988	25	Yes	Yes	CELLULOSE ACETATE FIBER 4	97.03	CELLULOSE ACETATE FIBER 4	97.03	Yes	ssft2_ca_strands_p&s		yes
2021-05-10	Spiked	Before	1	All	Top Premium King Size CA Cigarette Filters	CA	Fiber	Point and Shoot	8	-	-	891	32	Yes	Yes	CELLULOSE ACETATE FIBER 2	98.71	CELLULOSE ACETATE FIBER 2	98.71	Yes	ssft2_ca_strands_p&s		yes
2021-05-10	Spiked	Before	1	All	Top Premium King Size CA Cigarette Filters	CA	Fiber	Point and Shoot	9	-	-	708	30	Yes	Yes	CELLULOSE ACETATE FIBER 2	97.72	CELLULOSE ACETATE FIBER 2	97.72	No	ssft2_ca_strands_p&s		yes
2021-05-11	Spiked	Before	2	All	Polymer Kit 1.0 PP	PP	Large	Wizard	1,2	1335.8	593.1	1269.45	501.16	Yes	No	PP300PLUS7	97.62	PP300PLUS7	97.62	Yes	T3_PP_Large_Before_Wz		yes
2021-05-11	Spiked	Before	2	All	Polymer Kit 1.0 PP	PP	Large	Wizard	3,4,12	78.5	39.3	1198.96	488.32	Yes	No	PP 53-100 3	97.61	PP 53-100 3	97.61	Yes	T3_PP_Large_Before_Wz		yes
2021-05-11	Spiked	Before	2	All	Polymer Kit 1.0 PP	PP	Large	Wizard	5,6,7,8	384.5	131.1	450.14	257.73	Yes	No	PP 300 PLUS 5	99.64	PP 300 PLUS 5	99.64	Yes	T3_PP_Large_Before_Wz		yes
2021-05-11	Spiked	Before	2	All	Polymer Kit 1.0 PP	PP	Large	Wizard	9	865.7	562.8	822.03	523.83	Yes	No	PP 300 PLUS 4	98.83	PP 300 PLUS 4	98.83	Yes	T3_PP_Large_Before_Wz		yes
2021-05-11	Spiked	Before	2	All	Polymer Kit 1.0 PP	PP	Large	Wizard	10	893.9	428.6	804.88	411.18	Yes	No	PP 300 PLUS 4	97.47	PP 300 PLUS 4	97.47	Yes	T3_PP_Large_Before_Wz		yes
2021-05-11	Spiked	Before	2	All	Polymer Kit 1.0 PP	PP	Large	Wizard	11,15,16,17,18	117.2	69.3	881.86	328.47	Yes	No	PP_sigma_42789.6_c	99.8	PP_sigma_42789.6_c	99.8	Yes	T3_PP_Large_Before_Wz		yes
2021-05-11	Spiked	Before	2	All	Polymer Kit 1.0 PP	PP	Large	Wizard	13	731.7	519	728.69	537.03	Yes	No	PP 300 PLUS 4	99.15	PP 300 PLUS 4	99.15	Yes	T3_PP_Large_Before_Wz		yes
2021-05-11	Spiked	Before	2	All	Polymer Kit 1.0 PP	PP	Large	Wizard	14	1528.6	425.1	618.72	468.47	Yes	No	PP 300 PLUS 2	97.32	PP 300 PLUS 2	97.32	Yes	T3_PP_Large_Before_Wz		yes
2021-05-11	Spiked	Before	2	All	Polymer Kit 1.0 PP	PP	Large	Wizard	19	45.6	24.7	916.26	411.13	Yes	No	PP_sigma_42789.6_d	98.57	PP_sigma_42789.6_d	98.57	Yes	T3_PP_Large_Before_Wz		yes
2021-05-11	Spiked	Before	2	All	Polymer Kit 1.0 PP	PP	Large	Wizard	20	0	0	749.15	472.89	Yes	No	PP300PLUS_9	98.94	PP300PLUS_9	98.94	Yes	T3_PP_Large_Before_Wz		yes
2021-05-12	Spiked	Before	2	All	Polymer Kit 1.0 PP	PP	Medium	Wizard	1	549.5	262.9	548.73	298	Yes	No	PP_sigma_42789.6_d	99.08	PP_sigma_42789.6_d	99.08	Yes	T3_PP_Medium_Before_Wz		yes
2021-05-12	Spiked	Before	2	All	Polymer Kit 1.0 PP	PP	Medium	Wizard	2	528.7	257.6	493.68	219.64	Yes	No	PP 53-100 3	99.71	PP 53-100 3	99.71	Yes	T3_PP_Medium_Before_Wz		yes
2021-05-12	Spiked	Before	2	All	Polymer Kit 1.0 PP	PP	Medium	Wizard	3	403	263.2	355.01	275.45	Yes	No	PP_sigma_42789.6_d	99.1	PP_sigma_42789.6_d	99.1	Yes	T3_PP_Medium_Before_Wz		yes
2021-05-12	Spiked	Before	2	All	Polymer Kit 1.0 PP	PP	Medium	Wizard	4	389	163.8	367.27	196.3	Yes	No	PP 53-100 4	98.24	PP 53-100 4	98.24	Yes	T3_PP_Medium_Before_Wz		yes
2021-05-12	Spiked	Before	2	All	Polymer Kit 1.0 PP	PP	Medium	Wizard	5	403.7	163	381.85	263.1	Yes	No	PP 53-100 2	98.97	PP 53-100 2	98.97	Yes	T3_PP_Medium_Before_Wz		yes
2021-05-12	Spiked	Before	2	All	Polymer Kit 1.0 PP	PP	Medium	Wizard	6	356.8	219.7	331.45	198.92	Yes	No	PP 53-100 3	97.98	PP 53-100 3	97.98	Yes	T3_PP_Medium_Before_Wz		yes
2021-05-12	Spiked	Before	2	All	Polymer Kit 1.0 PP	PP	Medium	Wizard	7	68.2	58.7	57.9	48.6	No	No	Unidentified	0	Unidentified	0	Yes	T3_PP_Medium_Before_Wz		yes
2021-05-12	Spiked	Before	2	All	Polymer Kit 1.0 PP	PP	Medium	Wizard	8	522.2	189.3	376.47	318.57	Yes	No	PP 53-100 5	99.31	PP 53-100 5	99.31	Yes	T3_PP_Medium_Before_Wz		yes
2021-05-12	Spiked	Before	2	All	Polymer Kit 1.0 PP	PP	Medium	Wizard	9	591	254.3	560.2	305.54	Yes	No	PP_sigma_42789.6_c	98.83	PP_sigma_42789.6_c	98.83	Yes	T3_PP_Medium_Before_Wz		yes
2021-05-12	Spiked	Before	2	All	Polymer Kit 1.0 PP	PP	Medium	Wizard	10	97.4	54.8	102.2	66.14	Yes	No	PP 53-100 4	92.65	PP 53-100 4	92.65	Yes	T3_PP_Medium_Before_Wz		yes
2021-05-12	Spiked	Before	2	All	Polymer Kit 1.0 PP	PP	Medium	Wizard	11	225.2	89.7	215.35	114.71	Yes	No	Position (micrometers)=-2882 Âµm ;243 Âµm Number: 1	96.46	Position (micrometers)=-2882 Âµm ;243 Âµm Number: 1	96.46	Yes	T3_PP_Medium_Before_Wz		yes
2021-05-12	Spiked	Before	2	All	Polymer Kit 1.0 PP	PP	Medium	Wizard	12	455.2	308.4	426.71	273.5	Yes	No	PP_sigma_42789.6_b	99.69	PP_sigma_42789.6_b	99.69	Yes	T3_PP_Medium_Before_Wz		yes
2021-05-12	Spiked	Before	2	All	Polymer Kit 1.0 PP	PP	Medium	Wizard	13	482.9	231	473.19	237.55	Yes	No	PP_sigma_42789.6_d	99.12	PP_sigma_42789.6_d	99.12	Yes	T3_PP_Medium_Before_Wz		yes
2021-05-12	Spiked	Before	2	All	Polymer Kit 1.0 PP	PP	Medium	Wizard	14	0	0	646.05	96.92	Yes	No	CRUMB RUBBER 53-100 4	92.27	CRUMB RUBBER 53-100 4	92.27	Yes	T3_PP_Medium_Before_Wz		yes
2021-05-13	Spiked	Before	2	All	Polymer Kit 1.0 PVC.1	PVC	Large	Point and Shoot	1	-	-	1261.28	614.77	Yes	No	-		PVC 300 PLUS 4	98.36	Yes	T3_PVC_Large_Before_PointandShoot	P&S numbering	yes
2021-05-11	Spiked	Before	2	All	Polymer Kit 1.0 PVC.1	PVC	Large	Point and Shoot	2	-	-	1467.98	712.26	Yes	No	-		PVC 300 PLUS 4	97.37	Yes	T3_PVC_Large_Before_PointandShoot	P&S numbering	yes
2021-05-11	Spiked	Before	2	All	Polymer Kit 1.0 PVC.1	PVC	Large	Point and Shoot	3	-	-	1226.25	825	Yes	No	-		PVC 300 PLUS 3	95.34	Yes	T3_PVC_Large_Before_PointandShoot	P&S numbering	yes
2021-05-11	Spiked	Before	2	All	Polymer Kit 1.0 PVC.1	PVC	Large	Point and Shoot	4	-	-	1446.8	462.25	Yes	No	-		PVC 300 PLUS 4	94.22	Yes	T3_PVC_Large_Before_PointandShoot	P&S numbering	yes
2021-05-11	Spiked	Before	2	All	Polymer Kit 1.0 PVC.1	PVC	Large	Point and Shoot	5	-	-	1109.52	692.09	Yes	No	-		PVC 300 PLUS 4	95.51	Yes	T3_PVC_Large_Before_PointandShoot	P&S numbering	yes
2021-05-11	Spiked	Before	2	All	Polymer Kit 1.0 PVC.1	PVC	Large	Point and Shoot	6	-	-	939.08	770.82	Yes	No	-		PVC 300 PLUS 3	93.86	Yes	T3_PVC_Large_Before_PointandShoot	P&S numbering	yes
2021-05-11	Spiked	Before	2	All	Polymer Kit 1.0 PVC.1	PVC	Large	Point and Shoot	7	-	-	1388.23	834.44	Yes	No	-		PVC 300 PLUS 4	97.33	Yes	T3_PVC_Large_Before_PointandShoot	P&S numbering	yes
2021-05-11	Spiked	Before	2	All	Polymer Kit 1.0 PVC.1	PVC	Large	Point and Shoot	8	-	-	1311.4	616.49	Yes	No	-		PVC 300 PLUS 4	97.28	Yes	T3_PVC_Large_Before_PointandShoot	P&S numbering	yes
2021-05-11	Spiked	Before	2	All	Polymer Kit 1.0 PVC.1	PVC	Large	Point and Shoot	9	-	-	1759.97	591.13	Yes	No	-		PVC 300 PLUS 3	94.44	Yes	T3_PVC_Large_Before_PointandShoot	P&S numbering	yes
2021-05-11	Spiked	Before	2	All	Polymer Kit 1.0 PVC.1	PVC	Large	Point and Shoot	10	-	-	1326.12	1025.89	Yes	No	-		PVC 300 PLUS 4	93.95	Yes	T3_PVC_Large_Before_PointandShoot	P&S numbering	yes
2021-05-11	Spiked	Before	2	All	Polymer Kit 1.0 PVC.1	-	Large	Wizard	14,15,16,17,18	-	-	1481.35	664.37	Yes	No	-		Sharpie	95.02	Yes	T3_PVC_Large_Before_Wz		yes
2021-05-13	Spiked	Before	2	All	Polymer Kit 1.0 PVC.1	PVC	Medium	Wizard	1	506.4	315.5	300.39	225.36	Yes	No	PVC 100-300 1	99.58	PVC 100-300 1	99.58	Yes	T3_PVC_Medium_Before_Wz	P&S numbering	yes
2021-05-13	Spiked	Before	2	All	Polymer Kit 1.0 PVC.1	PVC	Medium	Wizard	2	437.6	187.3	476.61	324.69	Yes	No	PVC 100-300 1	99.29	PVC 100-300 1	99.29	Yes	T3_PVC_Medium_Before_Wz	P&S numbering	yes
2021-05-13	Spiked	Before	2	All	Polymer Kit 1.0 PVC.1	PVC	Medium	Wizard	3	486.4	212.3	389.71	287.41	Yes	No	PVC 100-300 2	98.77	PVC 100-300 2	98.77	Yes	T3_PVC_Medium_Before_Wz	P&S numbering	yes
2021-05-13	Spiked	Before	2	All	Polymer Kit 1.0 PVC.1	PVC	Medium	Wizard	4	596.5	331.3	355.38	225.79	Yes	No	PVC 100-300 3	98.9	PVC 100-300 3	98.9	Yes	T3_PVC_Medium_Before_Wz	P&S numbering	yes
2021-05-13	Spiked	Before	2	All	Polymer Kit 1.0 PVC.1	PVC	Medium	Wizard	5	379.1	217.9	557.39	203.26	Yes	No	PVC 100-300 3	99.93	PVC 100-300 3	99.93	Yes	T3_PVC_Medium_Before_Wz	P&S numbering	yes
2021-05-13	Spiked	Before	2	All	Polymer Kit 1.0 PVC.1	PVC	Medium	Wizard	6	558	131.4	427.1	215.42	Yes	No	PVC 53-100 3	97.77	PVC 53-100 3	97.77	Yes	T3_PVC_Medium_Before_Wz	P&S numbering	yes
2021-05-13	Spiked	Before	2	All	Polymer Kit 1.0 PVC.1	PVC	Medium	Wizard	7	524.1	327.2	457.05	232.23	Yes	No	PVC 100-300 3	98.91	PVC 100-300 3	98.91	Yes	T3_PVC_Medium_Before_Wz	P&S numbering	yes
2021-05-13	Spiked	Before	2	All	Polymer Kit 1.0 PVC.1	PVC	Medium	Wizard	8	352	225.5	301.44	204.35	Yes	No	PVC 100-300 1	99.42	PVC 100-300 1	99.42	Yes	T3_PVC_Medium_Before_Wz	P&S numbering	yes
2021-05-13	Spiked	Before	2	All	Polymer Kit 1.0 PVC.1	PVC	Medium	Wizard	9	597.5	226	540.76	209.86	Yes	No	PVC 100-300 3	99.92	PVC 100-300 3	99.92	Yes	T3_PVC_Medium_Before_Wz	P&S numbering	yes
2021-05-13	Spiked	Before	2	All	Polymer Kit 1.0 PVC.1	PVC	Medium	Wizard	22	469.7	257.5	342.78	369.35	Yes	No	PVC 100-300 3	99.6	PVC 100-300 3	99.6	Yes	T3_PVC_Medium_Before_Wz	P&S numbering	yes
2021-05-13	Spiked	Before	2	All	Polymer Kit 1.0 PVC.1	-	Medium	Wizard	10-21, 23-29	-	-	-	-	-	-	-	-	-	-	-	T3_PVC_Medium_Before_Wz	not particles	no
2021-05-11	Spiked	Before	2	All	Polymer Kit 1.0 PS	-	Large	Wizard	2022-01-19	-	-	-	-	-	-	-	-	-	-	-	-	not particles	no
2021-05-11	Spiked	Before	2	All	Polymer Kit 1.0 PS	-	Large	Wizard	20,21	249.7	131.1	828.5	203.27	Yes	No	Sharpie2	85.29	Sharpie2	85.29	Yes	T3_PS_Large_Before_Wz	sharpie outline	no
2021-05-11	Spiked	Before	2	All	Polymer Kit 1.0 PS	PS	Large	Wizard	22,30	42.7	28.9	512.41	290.94	Yes	No	PS 100 - 300 4	98.89	PS 100 - 300 4	98.89	Yes	T3_PS_Large_Before_Wz		yes
2021-05-11	Spiked	Before	2	All	Polymer Kit 1.0 PS	PS	Large	Wizard	23	328.2	250.2	354.53	296.39	Yes	No	PS300PLUS_8	99.84	PS300PLUS_8	99.84	Yes	T3_PS_Large_Before_Wz		yes
2021-05-11	Spiked	Before	2	All	Polymer Kit 1.0 PS	PS	Large	Wizard	24,25	706.9	313.4	908.38	498.52	Yes	No	PS 300 PLUS 2	99.32	PS 300 PLUS 2	99.32	Yes	T3_PS_Large_Before_Wz		yes
2021-05-11	Spiked	Before	2	All	Polymer Kit 1.0 PS	PS	Large	Wizard	26,27	609.2	311.7	627.72	482.56	Yes	No	PS 300 PLUS 2	99.62	PS 300 PLUS 2	99.62	Yes	T3_PS_Large_Before_Wz		yes
2021-05-11	Spiked	Before	2	All	Polymer Kit 1.0 PS	PS	Large	Wizard	28	576.9	366.3	546.33	371.47	Yes	No	PS300PLUS_10	98.97	PS300PLUS_10	98.97	Yes	T3_PS_Large_Before_Wz		yes
2021-05-11	Spiked	Before	2	All	Polymer Kit 1.0 PS	PS	Large	Wizard	29	785.6	564.8	778.84	527.97	Yes	No	PS 300 PLUS 3	96.91	PS 300 PLUS 3	96.91	Yes	T3_PS_Large_Before_Wz		yes
2021-05-11	Spiked	Before	2	All	Polymer Kit 1.0 PS	PS	Large	Wizard	31	347.3	245.9	315.73	310.16	Yes	No	PS 300 PLUS 2	99.63	PS 300 PLUS 2	99.63	Yes	T3_PS_Large_Before_Wz		yes
2021-05-11	Spiked	Before	2	All	Polymer Kit 1.0 PS	PS	Large	Wizard	32	843.6	641	834.49	627.83	Yes	No	PS 100-300 2	96.22	PS 100-300 2	96.22	Yes	T3_PS_Large_Before_Wz		yes
2021-05-11	Spiked	Before	2	All	Polymer Kit 1.0 PS	PS	Large	Wizard	33	518.2	365.2	472.42	375.34	Yes	No	PS300PLUS_10	99.35	PS300PLUS_10	99.35	Yes	T3_PS_Large_Before_Wz		yes
2021-05-11	Spiked	Before	2	All	Polymer Kit 1.0 PS	PS	Large	Wizard	34	0	0	888.52	707.75	Yes	No	PS 100-300 2	95.32	PS 100-300 2	95.32	Yes	T3_PS_Large_Before_Wz		yes
2021-05-13	Spiked	Before	2	All	Polymer Kit 1.0 PS	PS	Medium	Wizard	23	660.2	505.5	614.74	541.57	Yes	No	PS300PLUS_10	99.23	PS300PLUS_10	99.23	Yes	T3_PS_Medium_Before_Wz		yes
2021-05-13	Spiked	Before	2	All	Polymer Kit 1.0 PS	PS	Medium	Wizard	2	197.7	118.6	104.01	202.43	Yes	No	PS_GFPOWDER_SS2_2	99.6	PS_GFPOWDER_SS2_2	99.6	Yes	T3_PS_Medium_Before_Wz		yes
2021-05-13	Spiked	Before	2	All	Polymer Kit 1.0 PS	PS	Medium	Wizard	3	333.5	245.9	294.52	277.82	Yes	No	PS 100-300 5	99.66	PS 100-300 5	99.66	Yes	T3_PS_Medium_Before_Wz		yes
2021-05-13	Spiked	Before	2	All	Polymer Kit 1.0 PS	PS	Medium	Wizard	7	267	212.4	151.85	241.49	Yes	No	PS 100-300 5	99.65	PS 100-300 5	99.65	Yes	T3_PS_Medium_Before_Wz		yes
2021-05-13	Spiked	Before	2	All	Polymer Kit 1.0 PS	PS	Medium	Wizard	4	110.9	56.7	108.15	78.97	Yes	No	PS 100-300 2	98.32	PS 100-300 2	98.32	Yes	T3_PS_Medium_Before_Wz		yes
2021-05-13	Spiked	Before	2	All	Polymer Kit 1.0 PS	PS	Medium	Wizard	6	357.5	230.5	266.83	238.28	Yes	No	PS 100-300 5	99.79	PS 100-300 5	99.79	Yes	T3_PS_Medium_Before_Wz		yes
2021-05-13	Spiked	Before	2	All	Polymer Kit 1.0 PS	PS	Medium	Wizard	15	131.4	71.8	138.97	63.75	Yes	No	PS 100 - 300 4	98.42	PS 100 - 300 4	98.42	Yes	T3_PS_Medium_Before_Wz		yes
2021-05-13	Spiked	Before	2	All	Polymer Kit 1.0 PS	PS	Medium	Wizard	16	286.8	211.2	259.48	199.65	Yes	No	PS_GFPOWDER_SS2_2	99.47	PS_GFPOWDER_SS2_2	99.47	Yes	T3_PS_Medium_Before_Wz		yes
2021-05-13	Spiked	Before	2	All	Polymer Kit 1.0 PS	Other	Medium	Wizard	1,5,8-13,17-22,24-39	-	-	-	-	-	-	-	-	-	-	-	T3_PS_Medium_Before_Wz	not a plastic particle	no
2021-05-12	Spiked	Before	2	All	Polymer Kit 1.0 CR	CR	Large	Wizard	1	1561.1	861.2	1450.7	1038.93	Yes	No	CR300PLUS_6	98.79	CR300PLUS_6	98.79	Yes	T3_CR_Large_Before_Wz		yes
2021-05-12	Spiked	Before	2	All	Polymer Kit 1.0 CR	CR	Large	Wizard	2	1706.9	1136.8	1600.57	1266.67	Yes	No	CR300PLUS_6	99.22	CR300PLUS_6	99.22	Yes	T3_CR_Large_Before_Wz		yes
2021-05-12	Spiked	Before	2	All	Polymer Kit 1.0 CR	CR	Large	Wizard	3	1310	1027	1264.49	1157.28	Yes	No	CRUMB RUBBER 300 PLUS 4	98.99	CRUMB RUBBER 300 PLUS 4	98.99	Yes	T3_CR_Large_Before_Wz		yes
2021-05-12	Spiked	Before	2	All	Polymer Kit 1.0 CR	CR	Large	Wizard	4	1746.3	1290.1	1601.63	1320.61	Yes	No	CRUMB RUBBER 300 PLUS 4	92.86	CRUMB RUBBER 300 PLUS 4	92.86	Yes	T3_CR_Large_Before_Wz		yes
2021-05-12	Spiked	Before	2	All	Polymer Kit 1.0 CR	CR	Large	Wizard	5	1150.7	859.8	1142.23	980.48	Yes	No	CR300PLUS_9	99.2	CR300PLUS_9	99.2	Yes	T3_CR_Large_Before_Wz		yes
2021-05-12	Spiked	Before	2	All	Polymer Kit 1.0 CR	CR	Large	Wizard	6	990.5	629.4	982.56	577.88	Yes	No	CR300PLUS_10	97.71	CR300PLUS_10	97.71	Yes	T3_CR_Large_Before_Wz		yes
2021-05-12	Spiked	Before	2	All	Polymer Kit 1.0 CR	CR	Large	Wizard	7	1198.7	586.7	1178.07	495.32	Yes	No	CR300PLUS_9	99.51	CR300PLUS_9	99.51	Yes	T3_CR_Large_Before_Wz		yes
2021-05-12	Spiked	Before	2	All	Polymer Kit 1.0 CR	CR	Large	Wizard	8	0	0	1576.39	849.84	Yes	No	CR300PLUS_6	98.63	CR300PLUS_6	98.63	Yes	T3_CR_Large_Before_Wz		yes
2021-05-12	Spiked	Before	2	All	Polymer Kit 1.0 CR	CR	Large	Wizard	9	1749.5	1143.7	1536.2	1207.47	Yes	No	CR300PLUS_7	98.7	CR300PLUS_7	98.7	Yes	T3_CR_Large_Before_Wz		yes
2021-05-12	Spiked	Before	2	All	Polymer Kit 1.0 CR	CR	Large	Wizard	10	1793.6	879.6	1600.09	829.43	Yes	No	CR300PLUS_10	93.1	CR300PLUS_10	93.1	Yes	T3_CR_Large_Before_Wz		yes
2021-05-13	Spiked	Before	2	All	Polymer Kit 1.0 CR	CR	Medium	Wizard	1	61.1	40.5	52.06	40.91	No	No	CRUMB RUBBER 53-100 PLUS 1	97.5	CRUMB RUBBER 53-100 PLUS 1	97.5	Yes	T3_CR_Medium_Before_Wz		yes
2021-05-13	Spiked	Before	2	All	Polymer Kit 1.0 CR	CR	Medium	Wizard	2	224.2	30.5	226.63	23	Yes	No	CRUMB RUBBER 53-100 4	98.56	CRUMB RUBBER 53-100 4	98.56	Yes	T3_CR_Medium_Before_Wz		yes
2021-05-13	Spiked	Before	2	All	Polymer Kit 1.0 CR	CR	Medium	Wizard	3	122.1	66.7	87.48	110.19	No	No	CR300PLUS_9	96.66	CR300PLUS_9	96.66	Yes	T3_CR_Medium_Before_Wz		yes
2021-05-13	Spiked	Before	2	All	Polymer Kit 1.0 CR	CR	Medium	Wizard	4	35.9	21	52.24	18.18	No	No	CRUMB RUBBER 53-100 4	98.66	CRUMB RUBBER 53-100 4	98.66	Yes	T3_CR_Medium_Before_Wz		yes
2021-05-13	Spiked	Before	2	All	Polymer Kit 1.0 CR	CR	Medium	Wizard	5	287.5	137	259.93	143.39	Yes	No	CR300PLUS_9	98.08	CR300PLUS_9	98.08	Yes	T3_CR_Medium_Before_Wz		yes
2021-05-13	Spiked	Before	2	All	Polymer Kit 1.0 CR	CR	Medium	Wizard	6	186.7	54.1	120.11	63.64	Yes	No	CR300PLUS_9	97.06	CR300PLUS_9	97.06	Yes	T3_CR_Medium_Before_Wz		yes
2021-05-13	Spiked	Before	2	All	Polymer Kit 1.0 CR	CR	Medium	Wizard	7	53	40.3	61.42	32.22	No	No	CRUMB RUBBER 53-100 4	98.38	CRUMB RUBBER 53-100 4	98.38	Yes	T3_CR_Medium_Before_Wz		yes
2021-05-13	Spiked	Before	2	All	Polymer Kit 1.0 CR	CR	Medium	Wizard	8	426.2	217	327.34	279.96	Yes	No	CRUMB RUBBER 53-100 4	96.75	CRUMB RUBBER 53-100 4	96.75	Yes	T3_CR_Medium_Before_Wz		yes
2021-05-13	Spiked	Before	2	All	Polymer Kit 1.0 CR	CR	Medium	Wizard	9	67.5	58.4	77.41	59.82	No	No	CRUMB RUBBER 53-100 PLUS 1	97.3	CRUMB RUBBER 53-100 PLUS 1	97.3	Yes	T3_CR_Medium_Before_Wz		yes
2021-05-13	Spiked	Before	2	All	Polymer Kit 1.0 CR	CR	Medium	Wizard	10	39.5	20.4	48.77	28.97	No	No	CRUMB RUBBER 53-100 5	97.53	CRUMB RUBBER 53-100 5	97.53	Yes	T3_CR_Medium_Before_Wz		yes
2021-05-13	Spiked	Before	2	All	Polymer Kit 1.0 CR	CR	Medium	Wizard	11	39.5	30.3	46.05	39.71	No	No	CRUMB RUBBER 53-100 4	98.3	CRUMB RUBBER 53-100 4	98.3	Yes	T3_CR_Medium_Before_Wz		yes
2021-05-13	Spiked	Before	2	All	Polymer Kit 1.0 CR	CR	Medium	Wizard	12	28.9	22.7	42.74	27.52	No	No	CRUMB RUBBER 53-100 PLUS 1	95.21	CRUMB RUBBER 53-100 PLUS 1	95.21	Yes	T3_CR_Medium_Before_Wz		yes
2021-05-13	Spiked	Before	2	All	Polymer Kit 1.0 CR	CR	Medium	Wizard	13	35.9	18.7	47.42	18.82	No	No	CRUMB RUBBER 53-100 4	98.05	CRUMB RUBBER 53-100 4	98.05	Yes	T3_CR_Medium_Before_Wz		yes
2021-05-13	Spiked	Before	2	All	Polymer Kit 1.0 CR	CR	Medium	Wizard	14	32.3	24.4	32.79	41.86	No	No	CRUMB RUBBER 53-100 4	97.36	CRUMB RUBBER 53-100 4	97.36	Yes	T3_CR_Medium_Before_Wz		yes
2021-05-13	Spiked	Before	2	All	Polymer Kit 1.0 CR	CR	Medium	Wizard	15	329.2	137.6	301.91	138.95	Yes	No	CRUMB RUBBER 53-100 PLUS 1	97.37	CRUMB RUBBER 53-100 PLUS 1	97.37	Yes	T3_CR_Medium_Before_Wz		yes
2021-05-13	Spiked	Before	2	All	Polymer Kit 1.0 CR	CR	Medium	Wizard	16	66.8	57.5	75.58	54.06	No	No	CRUMB RUBBER 53-100 5	96.66	CRUMB RUBBER 53-100 5	96.66	Yes	T3_CR_Medium_Before_Wz		yes
2021-05-13	Spiked	Before	2	All	Polymer Kit 1.0 CR	CR	Medium	Wizard	17	195.4	114.3	171.18	109.1	Yes	No	CRUMB RUBBER 53-100 PLUS 1	98.08	CRUMB RUBBER 53-100 PLUS 1	98.08	Yes	T3_CR_Medium_Before_Wz		yes
2021-05-13	Spiked	Before	2	All	Polymer Kit 1.0 CR	CR	Medium	Wizard	18	87.4	42.8	98.74	52.64	No	No	CRUMB RUBBER 53-100 4	98.69	CRUMB RUBBER 53-100 4	98.69	Yes	T3_CR_Medium_Before_Wz		yes
2021-05-13	Spiked	Before	2	All	Polymer Kit 1.0 CR	CR	Medium	Wizard	19	97.7	57.8	95.41	45.33	No	No	CR300PLUS_9	95.02	CR300PLUS_9	95.02	Yes	T3_CR_Medium_Before_Wz		yes
2021-05-13	Spiked	Before	2	All	Polymer Kit 1.0 CR	CR	Medium	Wizard	20	90.1	55.1	87.79	65.63	No	No	CRUMB RUBBER 53-100 4	98.44	CRUMB RUBBER 53-100 4	98.44	Yes	T3_CR_Medium_Before_Wz		yes
2021-05-13	Spiked	Before	2	All	Polymer Kit 1.0 CR	CR	Medium	Wizard	21	51	39.2	39.77	60.3	No	No	CRUMB RUBBER 53-100 4	98.18	CRUMB RUBBER 53-100 4	98.18	Yes	T3_CR_Medium_Before_Wz		yes
2021-05-13	Spiked	Before	2	All	Polymer Kit 1.0 CR	CR	Medium	Wizard	22	442.5	237.6	388.12	201.13	Yes	No	CR300PLUS_11	99.53	CR300PLUS_11	99.53	Yes	T3_CR_Medium_Before_Wz		yes
2021-05-13	Spiked	Before	2	All	Polymer Kit 1.0 CR	CR	Medium	Wizard	23	114.9	80.7	90.79	114.9	No	No	CRUMB RUBBER 53-100 4	98.93	CRUMB RUBBER 53-100 4	98.93	Yes	T3_CR_Medium_Before_Wz		yes
2021-05-13	Spiked	Before	2	All	Polymer Kit 1.0 CR	CR	Medium	Wizard	24	274	134	258.8	152.29	Yes	No	CR300PLUS_9	98.44	CR300PLUS_9	98.44	Yes	T3_CR_Medium_Before_Wz		yes
2021-05-13	Spiked	Before	2	All	Polymer Kit 1.0 CR	CR	Medium	Wizard	25	84.1	64.6	89.24	76.59	No	No	CRUMB RUBBER 53-100 PLUS 1	94.57	CRUMB RUBBER 53-100 PLUS 1	94.57	Yes	T3_CR_Medium_Before_Wz		yes
2021-05-13	Spiked	Before	2	All	Polymer Kit 1.0 CR	CR	Medium	Wizard	26	424.1	216.6	390.51	173.21	Yes	No	CRUMB RUBBER 53-100 4	99.2	CRUMB RUBBER 53-100 4	99.2	Yes	T3_CR_Medium_Before_Wz		yes
2021-05-13	Spiked	Before	2	All	Polymer Kit 1.0 CR	CR	Medium	Wizard	27	43.1	30.5	38.93	28.77	No	No	CRUMB RUBBER 53-100 4	98	CRUMB RUBBER 53-100 4	98	Yes	T3_CR_Medium_Before_Wz		yes
2021-05-13	Spiked	Before	2	All	Polymer Kit 1.0 CR	CR	Medium	Wizard	28	48.2	36.8	56.5	50.76	No	No	CRUMB RUBBER 53-100 4	98.36	CRUMB RUBBER 53-100 4	98.36	Yes	T3_CR_Medium_Before_Wz		yes
2021-05-13	Spiked	Before	2	All	Polymer Kit 1.0 CR	CR	Medium	Wizard	29	68.2	38.3	74.29	35.33	No	No	CRUMB RUBBER 53-100 4	98.57	CRUMB RUBBER 53-100 4	98.57	Yes	T3_CR_Medium_Before_Wz		yes
2021-05-13	Spiked	Before	2	All	Polymer Kit 1.0 CR	CR	Medium	Wizard	30	82.6	65.6	78.48	59.1	No	No	CRUMB RUBBER 53-100 4	98.54	CRUMB RUBBER 53-100 4	98.54	Yes	T3_CR_Medium_Before_Wz		yes
2021-05-13	Spiked	Before	2	All	Polymer Kit 1.0 CR	CR	Medium	Wizard	31	294.4	142.5	284.98	164.61	Yes	No	CR300PLUS_9	98.23	CR300PLUS_9	98.23	Yes	T3_CR_Medium_Before_Wz		yes
2021-05-13	Spiked	Before	2	All	Polymer Kit 1.0 CR	CR	Medium	Wizard	32	165.5	79.6	153.8	66.55	Yes	No	CRUMB RUBBER 53-100 4	98.34	CRUMB RUBBER 53-100 4	98.34	Yes	T3_CR_Medium_Before_Wz		yes
2021-05-13	Spiked	Before	2	All	Polymer Kit 1.0 CR	CR	Medium	Wizard	33	117.4	88.2	112.14	87.17	Yes	No	CRUMB RUBBER 53-100 PLUS 1	98.2	CRUMB RUBBER 53-100 PLUS 1	98.2	Yes	T3_CR_Medium_Before_Wz		yes
2021-05-13	Spiked	Before	2	All	Polymer Kit 1.0 CR	CR	Medium	Wizard	34	50.3	40.2	54.58	46.98	No	No	CRUMB RUBBER 53-100 4	97.83	CRUMB RUBBER 53-100 4	97.83	Yes	T3_CR_Medium_Before_Wz		yes
2021-05-13	Spiked	Before	2	All	Polymer Kit 1.0 CR	CR	Medium	Wizard	35	394.4	249.4	273.29	350.87	Yes	No	CR300PLUS_9	98.45	CR300PLUS_9	98.45	Yes	T3_CR_Medium_Before_Wz		yes
2021-05-13	Spiked	Before	2	All	Polymer Kit 1.0 CR	CR	Medium	Wizard	36	46.7	40.8	36.82	42.48	No	No	CRUMB RUBBER 53-100 4	97.87	CRUMB RUBBER 53-100 4	97.87	Yes	T3_CR_Medium_Before_Wz		yes
2021-05-13	Spiked	Before	2	All	Polymer Kit 1.0 CR	CR	Medium	Wizard	37	43.4	31.4	42.38	36.82	No	No	CRUMB RUBBER 53-100 4	97.03	CRUMB RUBBER 53-100 4	97.03	Yes	T3_CR_Medium_Before_Wz		yes
2021-05-13	Spiked	Before	2	All	Polymer Kit 1.0 CR	CR	Medium	Wizard	38	209.2	116.5	207.34	149.1	Yes	No	CRUMB RUBBER 53-100 PLUS 1	98.09	CRUMB RUBBER 53-100 PLUS 1	98.09	Yes	T3_CR_Medium_Before_Wz		yes
2021-05-13	Spiked	Before	2	All	Polymer Kit 1.0 CR	CR	Medium	Wizard	39	100.5	56.8	108.15	55.81	Yes	No	CRUMB RUBBER 53-100 4	98.92	CRUMB RUBBER 53-100 4	98.92	Yes	T3_CR_Medium_Before_Wz		yes
2021-05-13	Spiked	Before	2	All	Polymer Kit 1.0 CR	CR	Medium	Wizard	40	25.9	24.7	31.92	32.67	No	No	CRUMB RUBBER 53-100 4	97.81	CRUMB RUBBER 53-100 4	97.81	Yes	T3_CR_Medium_Before_Wz		yes
2021-05-13	Spiked	Before	2	All	Polymer Kit 1.0 CR	CR	Medium	Wizard	41	180.6	106.6	132.01	115.22	Yes	No	CRUMB RUBBER 53-100 2	98.8	CRUMB RUBBER 53-100 2	98.8	Yes	T3_CR_Medium_Before_Wz		yes
2021-05-13	Spiked	Before	2	All	Polymer Kit 1.0 CR	CR	Medium	Wizard	42	370.3	127.5	248.22	122.61	Yes	No	CR300PLUS_9	97.52	CR300PLUS_9	97.52	Yes	T3_CR_Medium_Before_Wz		yes
2021-05-13	Spiked	Before	2	All	Polymer Kit 1.0 CR	CR	Medium	Wizard	43	61	35.5	60.42	34.03	No	No	CRUMB RUBBER 53-100 4	98.53	CRUMB RUBBER 53-100 4	98.53	Yes	T3_CR_Medium_Before_Wz		yes
2021-05-13	Spiked	Before	2	All	Polymer Kit 1.0 CR	CR	Medium	Wizard	44	61.1	27.9	61.18	36.99	No	No	CRUMB RUBBER 53-100 4	98.7	CRUMB RUBBER 53-100 4	98.7	Yes	T3_CR_Medium_Before_Wz		yes
2021-05-13	Spiked	Before	2	All	Polymer Kit 1.0 CR	CR	Medium	Wizard	45	28.7	22.3	21.41	35.72	No	No	CRUMB RUBBER 53-100 4	97.65	CRUMB RUBBER 53-100 4	97.65	Yes	T3_CR_Medium_Before_Wz		yes
2021-05-13	Spiked	Before	2	All	Polymer Kit 1.0 CR	CR	Medium	Wizard	46	131.8	76	133.06	59.38	Yes	No	CR300PLUS_9	96.72	CR300PLUS_9	96.72	Yes	T3_CR_Medium_Before_Wz		yes
2021-05-13	Spiked	Before	2	All	Polymer Kit 1.0 CR	CR	Medium	Wizard	47	104.1	67.3	69.05	82.29	No	No	CRUMB RUBBER 53-100 4	98.64	CRUMB RUBBER 53-100 4	98.64	Yes	T3_CR_Medium_Before_Wz		yes
2021-05-13	Spiked	Before	2	All	Polymer Kit 1.0 CR	CR	Medium	Wizard	48	494.8	193.1	449.95	230.99	Yes	No	CRUMB RUBBER 300 PLUS 3	95.07	CRUMB RUBBER 300 PLUS 3	95.07	Yes	T3_CR_Medium_Before_Wz		yes
2021-05-13	Spiked	Before	2	All	Polymer Kit 1.0 CR	CR	Medium	Wizard	49	75.4	37	78.15	43.78	No	No	CRUMB RUBBER 53-100 4	98.37	CRUMB RUBBER 53-100 4	98.37	Yes	T3_CR_Medium_Before_Wz		yes
2021-05-13	Spiked	Before	2	All	Polymer Kit 1.0 CR	CR	Medium	Wizard	50	61.4	34.5	72.5	48.15	No	No	CR300PLUS_10	89.52	CR300PLUS_10	89.52	Yes	T3_CR_Medium_Before_Wz		yes
2021-05-13	Spiked	Before	2	All	Polymer Kit 1.0 CR	CR	Medium	Wizard	51	0	0	72.09	63.58	No	No	CRUMB RUBBER 53-100 4	97.46	CRUMB RUBBER 53-100 4	97.46	Yes	T3_CR_Medium_Before_Wz		yes
2021-05-11	Spiked	Before	2	All	Polymer Kit 1.0 HDPE.1	Other	Large	Wizard	1,2	-	-	-	-	Yes	No	Sharpie5	89.19	Sharpie5	89.19	No	T3_HDPE_Large_Before_Wz	sharpie outline	yes
2021-05-11	Spiked	Before	2	All	Polymer Kit 1.0 HDPE.1	HDPE	Large	Wizard	3,4	1309.9	865.2	1314.54	874.93	Yes	No	PE_GF_powder_e	99.2	PE_GF_powder_e	99.2	No	T3_HDPE_Large_Before_Wz		yes
2021-05-11	Spiked	Before	2	All	Polymer Kit 1.0 HDPE.1	HDPE	Large	Wizard	5,6	903.6	303.3	845.6	562.22	Yes	No	HDPE 300 PLUS 1	99.07	HDPE 300 PLUS 1	99.07	No	T3_HDPE_Large_Before_Wz		yes
2021-05-11	Spiked	Before	2	All	Polymer Kit 1.0 HDPE.1	HDPE	Large	Wizard	7,8,9	1491.8	397.2	1390.21	663.02	Yes	No	HDPE 300 PLUS 4	99.83	HDPE 300 PLUS 4	99.83	No	T3_HDPE_Large_Before_Wz		yes
2021-05-11	Spiked	Before	2	All	Polymer Kit 1.0 HDPE.1	HDPE	Large	Wizard	10	111.4	52.5	435.21	259.72	Yes	No	CPE_WhB_e	98.88	CPE_WhB_e	98.88	No	T3_HDPE_Large_Before_Wz		yes
2021-05-11	Spiked	Before	2	All	Polymer Kit 1.0 HDPE.1	HDPE	Large	Wizard	11,12,13,17,18,19,20,21	42.9	27.3	1599.11	494.3	Yes	No	LDPE_GF_PELLET_SS6_1	97.69	LDPE_GF_PELLET_SS6_1	97.69	No	T3_HDPE_Large_Before_Wz		yes
2021-05-11	Spiked	Before	2	All	Polymer Kit 1.0 HDPE.1	HDPE	Large	Wizard	14,15	1380.9	691.3	1220.93	1024.1	Yes	No	HDPE 300 PLUS 1	99.2	HDPE 300 PLUS 1	99.2	No	T3_HDPE_Large_Before_Wz		yes
2021-05-11	Spiked	Before	2	All	Polymer Kit 1.0 HDPE.1	HDPE	Large	Wizard	16	665.7	262.2	603.72	476.16	Yes	No	HDPE 300 PLUS 3	99.4	HDPE 300 PLUS 3	99.4	No	T3_HDPE_Large_Before_Wz		yes
2021-05-11	Spiked	Before	2	All	Polymer Kit 1.0 HDPE.1	HDPE	Large	Wizard	22	744.4	326.7	721.34	601	Yes	No	HDPE 300 PLUS 1	99.64	HDPE 300 PLUS 1	99.64	No	T3_HDPE_Large_Before_Wz		yes
2021-05-11	Spiked	Before	2	All	Polymer Kit 1.0 HDPE.1	HDPE	Large	Wizard	23	1461	679.6	1244.28	707.23	Yes	No	HDPE300PLUS_8	99.61	HDPE300PLUS_8	99.61	No	T3_HDPE_Large_Before_Wz		yes
2021-05-11	Spiked	Before	2	All	Polymer Kit 1.0 HDPE.1	HDPE	Large	Wizard	24	1200.6	645.3	1055.17	988.8	Yes	No	HDPE 300 PLUS 3	99.88	HDPE 300 PLUS 3	99.88	No	T3_HDPE_Large_Before_Wz		yes
2021-05-11	Spiked	Before	2	All	Polymer Kit 1.0 HDPE.1	HDPE	Large	Wizard	25	908.6	547.8	776.24	757.94	Yes	No	HDPE300PLUS_7	99.7	HDPE300PLUS_7	99.7	No	T3_HDPE_Large_Before_Wz		yes
2021-05-11	Spiked	Before	2	All	Polymer Kit 1.0 HDPE.1	-	Large	Wizard	26-34	-	-	-	-	-	-	scratches on slide	-	-	-	-	T3_HDPE_Large_Before_Wz	-	no	-
2021-05-12	Spiked	Before	2	All	Polymer Kit 1.0 HDPE.1	HDPE	Medium	Point and Shoot	1	-	-	324.74	305.09	Yes	No	PE_GF_powder_e	99.68	PE_GF_powder_e	99.68	No	T3_HDPE_Medium_Before_PointandShoot	P&S numbering	yes
2021-05-12	Spiked	Before	2	All	Polymer Kit 1.0 HDPE.1	HDPE	Medium	Point and Shoot	2	-	-	409.27	179.7	Yes	No	CPE_WhB_b	98.63	CPE_WhB_b	98.63	No	T3_HDPE_Medium_Before_PointandShoot	P&S numbering	yes
2021-05-12	Spiked	Before	2	All	Polymer Kit 1.0 HDPE.1	HDPE	Medium	Point and Shoot	3	-	-	310.66	191.8	Yes	No	HDPE 300 PLUS 2	99.66	HDPE 300 PLUS 2	99.66	No	T3_HDPE_Medium_Before_PointandShoot	P&S numbering	yes
2021-05-12	Spiked	Before	2	All	Polymer Kit 1.0 HDPE.1	HDPE	Medium	Point and Shoot	4	-	-	313.66	147.5	Yes	No	HDPE 100-300 5	98.03	HDPE 100-300 5	98.03	No	T3_HDPE_Medium_Before_PointandShoot	P&S numbering	yes
2021-05-12	Spiked	Before	2	All	Polymer Kit 1.0 HDPE.1	HDPE	Medium	Point and Shoot	5	-	-	325.66	206.7	Yes	No	PE_GF_powder_e	99.28	PE_GF_powder_e	99.28	No	T3_HDPE_Medium_Before_PointandShoot	P&S numbering	yes
2021-05-12	Spiked	Before	2	All	Polymer Kit 1.0 HDPE.1	HDPE	Medium	Point and Shoot	6	-	-	194.32	94.79	Yes	No	CPE_WhB_a	98.06	CPE_WhB_a	98.06	No	T3_HDPE_Medium_Before_PointandShoot	P&S numbering	yes
2021-05-12	Spiked	Before	2	All	Polymer Kit 1.0 HDPE.1	HDPE	Medium	Point and Shoot	7	-	-	343.62	230.3	Yes	No	PE_GF_powder_d	99.64	PE_GF_powder_d	99.64	No	T3_HDPE_Medium_Before_PointandShoot	P&S numbering	yes
2021-05-12	Spiked	Before	2	All	Polymer Kit 1.0 HDPE.1	HDPE	Medium	Point and Shoot	8	-	-	406.04	250.07	Yes	No	HDPE 300 PLUS 2	99.38	HDPE 300 PLUS 2	99.38	No	T3_HDPE_Medium_Before_PointandShoot	P&S numbering	yes
2021-05-12	Spiked	Before	2	All	Polymer Kit 1.0 HDPE.1	HDPE	Medium	Point and Shoot	9	-	-	502.25	217.65	Yes	No	PE_GF_powder_e	99.74	PE_GF_powder_e	99.74	No	T3_HDPE_Medium_Before_PointandShoot	P&S numbering	yes
2021-05-12	Spiked	Before	2	All	Polymer Kit 1.0 HDPE.1	HDPE	Medium	Point and Shoot	10	-	-	230.22	203.99	Yes	No	PE_GF_POWDER_SS1_3	99.23	PE_GF_POWDER_SS1_3	99.23	No	T3_HDPE_Medium_Before_PointandShoot	P&S numbering	yes
2021-05-12	Spiked	Before	2	All	Polymer Kit 1.0 HDPE.1	HDPE	Medium	Point and Shoot	11	-	-	242.87	232.61	Yes	No	PE_GF_powder_d	99.76	PE_GF_powder_d	99.76	No	T3_HDPE_Medium_Before_PointandShoot	P&S numbering	yes
2021-05-12	Spiked	Before	2	All	Polymer Kit 1.0 HDPE.1	HDPE	Medium	Point and Shoot	12	-	-	270.21	241.71	Yes	No	PE_GF_powder_d	99.51	PE_GF_powder_d	99.51	No	T3_HDPE_Medium_Before_PointandShoot	P&S numbering	yes
2021-05-12	Spiked	Before	2	All	Polymer Kit 1.0 PA6	Nylon	Large	Point and Shoot	1	-	-	891.41	548.15	Yes	No	NYLON 300 PLUS 3	98.35	NYLON 300 PLUS 3	98.35	No	T3_Nylon_Large_Before_PointandShoot	P&S numbering	yes
2021-05-12	Spiked	Before	2	All	Polymer Kit 1.0 PA6	Nylon	Large	Point and Shoot	2	-	-	637.76	462.07	Yes	No	NYLON 300 PLUS 1	98.76	NYLON 300 PLUS 1	98.76	No	T3_Nylon_Large_Before_PointandShoot	P&S numbering	yes
2021-05-12	Spiked	Before	2	All	Polymer Kit 1.0 PA6	Nylon	Large	Point and Shoot	3	-	-	1060.35	709.12	Yes	No	NYLON 300 PLUS 1	98.77	NYLON 300 PLUS 1	98.77	No	T3_Nylon_Large_Before_PointandShoot	P&S numbering	yes
2021-05-12	Spiked	Before	2	All	Polymer Kit 1.0 PA6	Nylon	Large	Point and Shoot	4	-	-	622.48	254.13	Yes	No	NYLON 100-300 2	98.59	NYLON 100-300 2	98.59	No	T3_Nylon_Large_Before_PointandShoot	P&S numbering	yes
2021-05-12	Spiked	Before	2	All	Polymer Kit 1.0 PA6	Nylon	Large	Point and Shoot	5	-	-	650.6	507.95	Yes	No	NYLON6300PLUS_7	98.44	NYLON6300PLUS_7	98.44	No	T3_Nylon_Large_Before_PointandShoot	P&S numbering	yes
2021-05-12	Spiked	Before	2	All	Polymer Kit 1.0 PA6	Nylon	Large	Point and Shoot	6	-	-	717.5	760.29	Yes	No	NYLON 300 PLUS 2	99.37	NYLON 300 PLUS 2	99.37	No	T3_Nylon_Large_Before_PointandShoot	P&S numbering	yes
2021-05-12	Spiked	Before	2	All	Polymer Kit 1.0 PA6	Nylon	Large	Point and Shoot	7	-	-	642.6	317.4	Yes	No	NYLON 300 PLUS 4	94.56	NYLON 300 PLUS 4	94.56	No	T3_Nylon_Large_Before_PointandShoot	P&S numbering	yes
2021-05-12	Spiked	Before	2	All	Polymer Kit 1.0 PA6	Nylon	Large	Point and Shoot	8	-	-	486.59	240.8	Yes	No	NYLON 300 PLUS 4	98.93	NYLON 300 PLUS 4	98.93	No	T3_Nylon_Large_Before_PointandShoot	P&S numbering	yes
2021-05-12	Spiked	Before	2	All	Polymer Kit 1.0 PA6	Nylon	Large	Point and Shoot	9	-	-	710.612	596.24	Yes	No	NYLON 300 PLUS 1	98.15	NYLON 300 PLUS 1	98.15	No	T3_Nylon_Large_Before_PointandShoot	P&S numbering	yes
2021-05-12	Spiked	Before	2	All	Polymer Kit 1.0 PA6	Nylon	Large	Point and Shoot	10	-	-	1060.38	732.48	Yes	No	NYLON 300 PLUS 1	97.48	NYLON 300 PLUS 1	97.48	No	T3_Nylon_Large_Before_PointandShoot	P&S numbering	yes
2021-05-12	Spiked	Before	2	All	Polymer Kit 1.0 PA6	Nylon	Large	Point and Shoot	11	-	-	732.22	663.91	Yes	No	NYLON 300 PLUS 4	98.24	NYLON 300 PLUS 4	98.24	No	T3_Nylon_Large_Before_PointandShoot	P&S numbering	yes
2021-05-13	Spiked	Before	2	All	Polymer Kit 1.0 PA6	Nylon	Medium	Point and Shoot	1	-	-	294.99	223.1	Yes	No	NYLON 100-300 2	99.63	NYLON 100-300 2	99.63	No	T3_Nylon_Medium_Before_PointandShoot	P&S numbering	yes
2021-05-13	Spiked	Before	2	All	Polymer Kit 1.0 PA6	Nylon	Medium	Point and Shoot	2	-	-	386.89	338.65	Yes	No	NYLON 300 PLUS 5	99.24	NYLON 300 PLUS 5	99.24	No	T3_Nylon_Medium_Before_PointandShoot	P&S numbering	yes
2021-05-13	Spiked	Before	2	All	Polymer Kit 1.0 PA6	Nylon	Medium	Point and Shoot	3	-	-	395.22	261.89	Yes	No	NYLON 300 PLUS 5	99.36	NYLON 300 PLUS 5	99.36	No	T3_Nylon_Medium_Before_PointandShoot	P&S numbering	yes
2021-05-13	Spiked	Before	2	All	Polymer Kit 1.0 PA6	Nylon	Medium	Point and Shoot	4	-	-	368.62	315.79	Yes	No	NYLON 300 PLUS 4	99.36	NYLON 300 PLUS 4	99.36	No	T3_Nylon_Medium_Before_PointandShoot	P&S numbering	yes
2021-05-13	Spiked	Before	2	All	Polymer Kit 1.0 PA6	Nylon	Medium	Point and Shoot	5	-	-	407.91	312.71	Yes	No	NYLON 300 PLUS 4	99.2	NYLON 300 PLUS 4	99.2	No	T3_Nylon_Medium_Before_PointandShoot	P&S numbering	yes
2021-05-13	Spiked	Before	2	All	Polymer Kit 1.0 PA6	Nylon	Medium	Point and Shoot	6	-	-	344.64	291.95	Yes	No	NYLON 300 PLUS 2	99.53	NYLON 300 PLUS 2	99.53	No	T3_Nylon_Medium_Before_PointandShoot	P&S numbering	yes
2021-05-13	Spiked	Before	2	All	Polymer Kit 1.0 PA6	Nylon	Medium	Point and Shoot	7	-	-	470.92	218.66	Yes	No	NYLON 100-300 2	99.07	NYLON 100-300 2	99.07	No	T3_Nylon_Medium_Before_PointandShoot	P&S numbering	yes
2021-05-13	Spiked	Before	2	All	Polymer Kit 1.0 PA6	Nylon	Medium	Point and Shoot	8	-	-	323.92	260.22	Yes	No	NYLON 100-300 2	99.72	NYLON 100-300 2	99.72	No	T3_Nylon_Medium_Before_PointandShoot	P&S numbering	yes
2021-05-13	Spiked	Before	2	All	Polymer Kit 1.0 PA6	Nylon	Medium	Point and Shoot	9	-	-	293.09	191.77	Yes	No	NYLON 100-300 1	98.39	NYLON 100-300 1	98.39	No	T3_Nylon_Medium_Before_PointandShoot	P&S numbering	yes
2021-05-13	Spiked	Before	2	All	Polymer Kit 1.0 PA6	Nylon	Medium	Point and Shoot	10	-	-	358.15	224.05	Yes	No	NYLON6300PLUS_7	98.89	NYLON6300PLUS_7	98.89	No	T3_Nylon_Medium_Before_PointandShoot	P&S numbering	yes
2021-05-14	Spiked	Before	2	All	Top Premium King Size CA Cigarette Filters	CA	Fiber	Point and Shoot	1	2238.1	24.24	2238.1	24.24	Yes	Yes	CELLULOSE ACETATE FIBER 3	93.6	CELLULOSE ACETATE FIBER 3	93.6	No	T3_CA_Fiber_Before_PointandShoot	P&S numbering	yes
2021-05-14	Spiked	Before	2	All	Top Premium King Size CA Cigarette Filters	CA	Fiber	Point and Shoot	2	583.23	33.23	583.23	33.23	Yes	Yes	CELLULOSE ACETATE FIBER 4	97.23	CELLULOSE ACETATE FIBER 4	97.23	No	T3_CA_Fiber_Before_PointandShoot	P&S numbering	yes
2021-05-14	Spiked	Before	2	All	Top Premium King Size CA Cigarette Filters	CA	Fiber	Point and Shoot	3	1016.54	25.25	1016.54	25.25	Yes	Yes	CELLULOSE ACETATE FIBER 3	99.11	CELLULOSE ACETATE FIBER 3	99.11	No	T3_CA_Fiber_Before_PointandShoot	P&S numbering	yes
2021-05-14	Spiked	Before	2	All	Top Premium King Size CA Cigarette Filters	CA	Fiber	Point and Shoot	4	1049.12	36.15	1049.12	36.15	Yes	Yes	CELLULOSE ACETATE FIBER 2	91.85	CELLULOSE ACETATE FIBER 2	91.85	No	T3_CA_Fiber_Before_PointandShoot	P&S numbering	yes
2021-05-14	Spiked	Before	2	All	Top Premium King Size CA Cigarette Filters	CA	Fiber	Point and Shoot	5	1003.29	56.62	1003.29	56.62	Yes	Yes	CELLULOSE ACETATE FIBER 3	94.85	CELLULOSE ACETATE FIBER 3	94.85	No	T3_CA_Fiber_Before_PointandShoot	P&S numbering	yes
2021-05-14	Spiked	Before	2	All	Top Premium King Size CA Cigarette Filters	CA	Fiber	Point and Shoot	6	1655.68	35.82	1655.68	35.82	Yes	Yes	CELLULOSE ACETATE FIBER 4	98.83	CELLULOSE ACETATE FIBER 4	98.83	No	T3_CA_Fiber_Before_PointandShoot	P&S numbering	yes
2021-05-14	Spiked	Before	2	All	Top Premium King Size CA Cigarette Filters	CA	Fiber	Point and Shoot	7	945.82	24.03	945.82	24.03	Yes	Yes	CA 300 PLUS 3	92.43	CA 300 PLUS 3	92.43	No	T3_CA_Fiber_Before_PointandShoot	P&S numbering	yes
2021-05-14	Spiked	Before	2	All	Top Premium King Size CA Cigarette Filters	CA	Fiber	Point and Shoot	8	1030.5	31.2	1030.5	31.2	Yes	Yes	CA 300 PLUS 3	96.33	CA 300 PLUS 3	96.33	No	T3_CA_Fiber_Before_PointandShoot	P&S numbering	yes
2021-05-14	Spiked	Before	2	All	Top Premium King Size CA Cigarette Filters	CA	Fiber	Point and Shoot	9	825.73	39.23	825.73	39.23	Yes	Yes	CA 300 PLUS 2	97.65	CA 300 PLUS 2	97.65	No	T3_CA_Fiber_Before_PointandShoot	P&S numbering	yes
2021-05-14	Spiked	Before	2	All	Top Premium King Size CA Cigarette Filters	CA	Fiber	Point and Shoot	10	3529.3	44.69	3529.3	44.69	Yes	Yes	CELLULOSE ACETATE FIBER 3	98.05	CELLULOSE ACETATE FIBER 3	98.05	No	T3_CA_Fiber_Before_PointandShoot	P&S numbering	yes
2021-05-14	Spiked	Before	2	All	Polymer Kit 1.0 PEST	PEST	Fiber	Point and Shoot	1	-	-	1571.23	27.51	Yes	Yes	POLYESTER FINE 2	98.63	POLYESTER FINE 2	98.63	No	T3_PEST_Fiber_Before_PointandShoot		yes
2021-05-14	Spiked	Before	2	All	Polymer Kit 1.0 PEST	PEST	Fiber	Point and Shoot	2	-	-	1964.51	56.23	Yes	Yes	POLYESTER FINE 1	97.37	POLYESTER FINE 1	97.37	No	T3_PEST_Fiber_Before_PointandShoot		yes
2021-05-14	Spiked	Before	2	All	Polymer Kit 1.0 PEST	PEST	Fiber	Point and Shoot	3	-	-	1901.99	61.38	Yes	Yes	POLYESTER FINE 4	99	POLYESTER FINE 4	99	No	T3_PEST_Fiber_Before_PointandShoot		yes
2021-05-14	Spiked	Before	2	All	Polymer Kit 1.0 PEST	PEST	Fiber	Point and Shoot	4	-	-	1441.04	49.83	Yes	Yes	POLYSESTER FINE 1	94.64	POLYSESTER FINE 1	94.64	No	T3_PEST_Fiber_Before_PointandShoot		yes
2021-05-14	Spiked	Before	2	All	Polymer Kit 1.0 PEST	PEST	Fiber	Point and Shoot	5	-	-	1300.97	72.34	Yes	Yes	POLYESTER FINE 2	97.89	POLYESTER FINE 2	97.89	No	T3_PEST_Fiber_Before_PointandShoot		yes
2021-05-14	Spiked	Before	2	All	Polymer Kit 1.0 PEST	PEST	Fiber	Point and Shoot	6	-	-	1041.82	34.33	Yes	Yes	Polyester_150_FibLib_b	97.81	Polyester_150_FibLib_b	97.81	No	T3_PEST_Fiber_Before_PointandShoot		yes
2021-05-14	Spiked	Before	2	All	Polymer Kit 1.0 PEST	PEST	Fiber	Point and Shoot	7	-	-	1314.89	64.77	Yes	Yes	POLYESTER FINE 3	94.4	POLYESTER FINE 3	94.4	No	T3_PEST_Fiber_Before_PointandShoot		yes
2021-05-14	Spiked	Before	2	All	Polymer Kit 1.0 PEST	PEST	Fiber	Point and Shoot	8	-	-	2396.59	46.51	Yes	Yes	POLYESTER FINE 4	96.8	POLYESTER FINE 4	96.8	No	T3_PEST_Fiber_Before_PointandShoot		yes
2021-05-14	Spiked	Before	2	All	Polymer Kit 1.0 PEST	PEST	Fiber	Point and Shoot	9	-	-	1946.15	47.49	Yes	Yes	POLYESTER FINE 4	94.54	POLYESTER FINE 4	94.54	No	T3_PEST_Fiber_Before_PointandShoot		yes
2021-05-14	Spiked	Before	2	All	Polymer Kit 1.0 PEST	PEST	Fiber	Point and Shoot	10	-	-	822.56	37.18	Yes	Yes	POLYESTER FINE 4	99.19	POLYESTER FINE 4	99.19	No	T3_PEST_Fiber_Before_PointandShoot		yes
2021-05-17	Spiked	Before	3	All	Polymer Kit 1.0 PP	PP	large	Wizard	2, 3,4,5,7	143.3	26.3	1012.96	705.58	Yes	No	PP 53-100 3	97.03	PP 53-100 3	97.03	No	T4_PP_Large_Before_Wz		yes
2021-05-17	Spiked	Before	3	All	Polymer Kit 1.0 PP	PP	large	Wizard	6	1382.6	631.3	1383.98	650.01	Yes	No	PP 300 PLUS 1	95.71	PP 300 PLUS 1	95.71	No	T4_PP_Large_Before_Wz		yes
2021-05-17	Spiked	Before	3	All	Polymer Kit 1.0 PP	PP	large	Wizard	8	1044.2	630	1034.31	980.4	Yes	No	PP 300 PLUS 2	98.96	PP 300 PLUS 2	98.96	No	T4_PP_Large_Before_Wz		yes
2021-05-17	Spiked	Before	3	All	Polymer Kit 1.0 PP	PP	large	Wizard	9	1196.8	489.7	1245.87	616.36	Yes	No	PP 300 PLUS 4	98.5	PP 300 PLUS 4	98.5	No	T4_PP_Large_Before_Wz		yes
2021-05-17	Spiked	Before	3	All	Polymer Kit 1.0 PP	PP	large	Wizard	10	1267.1	526.4	1279.56	597.55	Yes	No	PP300PLUS7	97.16	PP300PLUS7	97.16	No	T4_PP_Large_Before_Wz		yes
2021-05-17	Spiked	Before	3	All	Polymer Kit 1.0 PP	PP	large	Wizard	2013-11-12	152.7	57.4	973.86	697.98	Yes	No	PP300PLUS_9	98.24	PP300PLUS_9	98.24	No	T4_PP_Large_Before_Wz		yes
2021-05-17	Spiked	Before	3	All	Polymer Kit 1.0 PP	PP	large	Wizard	14,15	156.9	73.8	991.82	809.04	Yes	No	PP 300 PLUS 3	97.88	PP 300 PLUS 3	97.88	No	T4_PP_Large_Before_Wz		yes
2021-05-17	Spiked	Before	3	All	Polymer Kit 1.0 PP	PP	large	Wizard	16	1272.3	767.7	1257.26	796.98	Yes	No	PP300PLUS7	99.1	PP300PLUS7	99.1	No	T4_PP_Large_Before_Wz		yes
2021-05-17	Spiked	Before	3	All	Polymer Kit 1.0 PP	PP	large	Wizard	17	642.4	266.3	708.1	695.39	Yes	No	PP 300 PLUS 2	97.7	PP 300 PLUS 2	97.7	No	T4_PP_Large_Before_Wz		yes
2021-05-17	Spiked	Before	3	All	Polymer Kit 1.0 PP	PP	large	Wizard	18	0	0	1151.91	1074.33	Yes	No	PP300PLUS7	96.39	PP300PLUS7	96.39	No	T4_PP_Large_Before_Wz		yes
2021-05-24	Spiked	Before	3	All	Polymer Kit 1.0 PP	PP	medium	Wizard	1,2	259.2	137.3	239.94	279.01	Yes	No	PP 53-100 5	99.05	PP 53-100 5	99.05	No	T4_PP_Medium_Before_Wz		yes
2021-05-24	Spiked	Before	3	All	Polymer Kit 1.0 PP	PP	medium	Wizard	3	410.9	201.4	350.75	263.59	Yes	No	PP_sigma_42789.6_d	99.07	PP_sigma_42789.6_d	99.07	No	T4_PP_Medium_Before_Wz		yes
2021-05-24	Spiked	Before	3	All	Polymer Kit 1.0 PP	PP	medium	Wizard	4	216.2	150.8	188.16	168.27	Yes	No	PP_sigma_42789.6_b	99.26	PP_sigma_42789.6_b	99.26	No	T4_PP_Medium_Before_Wz		yes
2021-05-24	Spiked	Before	3	All	Polymer Kit 1.0 PP	PP	medium	Wizard	5	150	63.9	194.01	77.67	Yes	No	PP 53-100 3	97.9	PP 53-100 3	97.9	No	T4_PP_Medium_Before_Wz		yes
2021-05-24	Spiked	Before	3	All	Polymer Kit 1.0 PP	PP	medium	Wizard	6,7,8	61	26.4	197.66	126.57	Yes	No	PP 53-100 5	98.79	PP 53-100 5	98.79	No	T4_PP_Medium_Before_Wz		yes
2021-05-24	Spiked	Before	3	All	Polymer Kit 1.0 PP	PP	medium	Wizard	9	405	167.8	350.38	210.8	Yes	No	PP_sigma_42789.6_d	98.51	PP_sigma_42789.6_d	98.51	No	T4_PP_Medium_Before_Wz		yes
2021-05-24	Spiked	Before	3	All	Polymer Kit 1.0 PP	PP	medium	Wizard	10	142	54	247.42	111.85	Yes	No	PP 53-100 3	95.9	PP 53-100 3	95.9	No	T4_PP_Medium_Before_Wz		yes
2021-05-24	Spiked	Before	3	All	Polymer Kit 1.0 PP	PP	medium	Wizard	11	257.8	83.2	264.23	87.79	Yes	No	PP 53-100 3	98.09	PP 53-100 3	98.09	No	T4_PP_Medium_Before_Wz		yes
2021-05-24	Spiked	Before	3	All	Polymer Kit 1.0 PP	PP	medium	Wizard	12,13,14,15	579.4	121.9	571.4	326.16	Yes	No	PP_sigma_42789.6_d	99.03	PP_sigma_42789.6_d	99.03	No	T4_PP_Medium_Before_Wz		yes
2021-05-24	Spiked	Before	3	All	Polymer Kit 1.0 PP	PP	medium	Wizard	16,17	135.7	77.4	172.83	118.28	Yes	No	PP 53-100 3	92.08	PP 53-100 3	92.08	No	T4_PP_Medium_Before_Wz		yes
2021-05-24	Spiked	Before	3	All	Polymer Kit 1.0 PP	PP	medium	Wizard	18	129.3	24.4	182.66	53.72	Yes	No	PP 53-100 3	91.33	PP 53-100 3	91.33	No	T4_PP_Medium_Before_Wz		yes
2021-05-24	Spiked	Before	3	All	Polymer Kit 1.0 PP	PP	medium	Wizard	19,20	315.5	94.5	717.7	156.51	Yes	No	PP 53-100 3	99.72	PP 53-100 3	99.72	No	T4_PP_Medium_Before_Wz		yes
2021-05-24	Spiked	Before	3	All	Polymer Kit 1.0 PP	PP	medium	Wizard	21,22,23,24	53.9	13.7	275.5	218.14	Yes	No	PP 53-100 4	97.03	PP 53-100 4	97.03	No	T4_PP_Medium_Before_Wz		yes
2021-05-24	Spiked	Before	3	All	Polymer Kit 1.0 PP	PP	medium	Wizard	25,26,33	50.3	15.7	622.75	289.18	Yes	No	PP 53-100 3	98.55	PP 53-100 3	98.55	No	T4_PP_Medium_Before_Wz		yes
2021-05-24	Spiked	Before	3	All	Polymer Kit 1.0 PP	PP	medium	Wizard	27,28,29,20	32.3	19.8	196.37	129.72	Yes	No	PP 53-100 3	97.19	PP 53-100 3	97.19	No	T4_PP_Medium_Before_Wz		yes
2021-05-24	Spiked	Before	3	All	Polymer Kit 1.0 PP	PP	medium	Wizard	31	161.4	64	196.9	118.79	Yes	No	PP 53-100 3	97.28	PP 53-100 3	97.28	No	T4_PP_Medium_Before_Wz		yes
2021-05-24	Spiked	Before	3	All	Polymer Kit 1.0 PP	PP	medium	Wizard	32	0	0	328.8	118.85	Yes	No	PP 53-100 3	91.4	PP 53-100 3	91.4	No	T4_PP_Medium_Before_Wz		yes
2021-05-19	Spiked	Before	3	All	Polymer Kit 1.0 PVC.1	PVC	large	Wizard	1,2	1174.5	569.7	1181.67	805.22	Yes	No	PVC 100-300 1	98.53	PVC 100-300 1	98.53	No	T4_PVC_Large_Before_Wz		yes
2021-05-19	Spiked	Before	3	All	Polymer Kit 1.0 PVC.1	PVC	large	Wizard	3	1303.3	752.1	1202.17	773.82	Yes	No	PVC 300 PLUS 4	99.28	PVC 300 PLUS 4	99.28	No	T4_PVC_Large_Before_Wz		yes
2021-05-19	Spiked	Before	3	All	Polymer Kit 1.0 PVC.1	PVC	large	Wizard	4	879.1	524.8	703.99	546.69	Yes	No	PVC 100-300 3	98.45	PVC 100-300 3	98.45	No	T4_PVC_Large_Before_Wz		yes
2021-05-19	Spiked	Before	3	All	Polymer Kit 1.0 PVC.1	PVC	large	Wizard	5	1252.2	966.5	1107.96	998.21	Yes	No	PVC 300 PLUS 4	99	PVC 300 PLUS 4	99	No	T4_PVC_Large_Before_Wz		yes
2021-05-19	Spiked	Before	3	All	Polymer Kit 1.0 PVC.1	PVC	large	Wizard	6,7	42.5	27.7	1166.48	689.59	Yes	No	PVC 53-100 3	95.36	PVC 53-100 3	95.36	No	T4_PVC_Large_Before_Wz		yes
2021-05-19	Spiked	Before	3	All	Polymer Kit 1.0 PVC.1	PVC	large	Wizard	8,9	633.6	57.4	775.01	283.38	Yes	No	PVC 53-100 5	96.06	PVC 53-100 5	96.06	No	T4_PVC_Large_Before_Wz		yes
2021-05-19	Spiked	Before	3	All	Polymer Kit 1.0 PVC.1	PVC	large	Wizard	10,11	83.6	21.6	1151.19	688.52	Yes	No	PVC 300 PLUS 4	97.9	PVC 300 PLUS 4	97.9	No	T4_PVC_Large_Before_Wz		yes
2021-05-19	Spiked	Before	3	All	Polymer Kit 1.0 PVC.1	PVC	large	Wizard	12	1438	1111.4	1395.84	1182.38	Yes	No	PVC300PLUS_1	97.95	PVC300PLUS_1	97.95	No	T4_PVC_Large_Before_Wz		yes
2021-05-19	Spiked	Before	3	All	Polymer Kit 1.0 PVC.1	PVC	large	Wizard	13	716.8	323.2	691.42	363.16	Yes	No	PVC 300 PLUS 4	98.18	PVC 300 PLUS 4	98.18	No	T4_PVC_Large_Before_Wz		yes
2021-05-19	Spiked	Before	3	All	Polymer Kit 1.0 PVC.1	PVC	large	Wizard	14,15,16,17	416.1	77	546.34	461.5	Yes	No	PVC 100-300 3	98.26	PVC 100-300 3	98.26	No	T4_PVC_Large_Before_Wz		yes
2021-05-25	Spiked	Before	3	All	Polymer Kit 1.0 PVC.1	PVC	medium	Wizard	5	340.4	245.5	316.89	288.06	Yes	No	PVC 100-300 1	99.73	PVC 100-300 1	99.73	No	T4_PVC_Medium_Before_Wz		yes
2021-05-25	Spiked	Before	3	All	Polymer Kit 1.0 PVC.1	PVC	medium	Wizard	6	568.3	271.4	557.82	289.11	Yes	No	PVC 100-300 1	99.8	PVC 100-300 1	99.8	No	T4_PVC_Medium_Before_Wz		yes
2021-05-25	Spiked	Before	3	All	Polymer Kit 1.0 PVC.1	PVC	medium	Wizard	7	500.5	217.7	465.26	293.04	Yes	No	PVC 100-300 2	99.22	PVC 100-300 2	99.22	No	T4_PVC_Medium_Before_Wz		yes
2021-05-25	Spiked	Before	3	All	Polymer Kit 1.0 PVC.1	PVC	medium	Wizard	8	425.1	236.6	377.5	298.58	Yes	No	PVC 100-300 3	99.67	PVC 100-300 3	99.67	No	T4_PVC_Medium_Before_Wz		yes
2021-05-25	Spiked	Before	3	All	Polymer Kit 1.0 PVC.1	PVC	medium	Wizard	10	473.7	233.5	460.35	188.8	Yes	No	PVC 100-300 1	99.51	PVC 100-300 1	99.51	No	T4_PVC_Medium_Before_Wz		yes
2021-05-25	Spiked	Before	3	All	Polymer Kit 1.0 PVC.1	PVC	medium	Wizard	11	470.6	290.7	439.34	304.93	Yes	No	PVC 100-300 3	99.57	PVC 100-300 3	99.57	No	T4_PVC_Medium_Before_Wz		yes
2021-05-25	Spiked	Before	3	All	Polymer Kit 1.0 PVC.1	PVC	medium	Wizard	12	566.3	211.4	544.48	189.21	Yes	No	PVC 100-300 1	99.89	PVC 100-300 1	99.89	No	T4_PVC_Medium_Before_Wz		yes
2021-05-25	Spiked	Before	3	All	Polymer Kit 1.0 PVC.1	PVC	medium	Wizard	13	106.8	62	113.42	81.4	Yes	No	PVC 53-100 3	99.41	PVC 53-100 3	99.41	No	T4_PVC_Medium_Before_Wz		yes
2021-05-25	Spiked	Before	3	All	Polymer Kit 1.0 PVC.1	PVC	medium	Wizard	14	387.5	225.4	381.98	426.43	Yes	No	PVC 100-300 1	99.53	PVC 100-300 1	99.53	No	T4_PVC_Medium_Before_Wz		yes
2021-05-25	Spiked	Before	3	All	Polymer Kit 1.0 PVC.1	PVC	medium	Wizard	15	518.5	193.2	532.58	241.13	Yes	No	PVC 100-300 2	99.53	PVC 100-300 2	99.53	No	T4_PVC_Medium_Before_Wz		yes
2021-05-25	Spiked	Before	3	All	Polymer Kit 1.0 PVC.1	PVC	medium	Wizard	16	0	0	327.47	362.56	Yes	No	PVC 100-300 3	99.66	PVC 100-300 3	99.66	No	T4_PVC_Medium_Before_Wz		yes
2021-05-25	Spiked	Before	3	All	Polymer Kit 1.0 PVC.1	PVC	medium	Wizard	17	65.6	42.4	148.13	111.41	Yes	No	PVC 53-100 3	95.3	PVC 53-100 3	95.3	No	T4_PVC_Medium_Before_Wz		yes
2021-05-19	Spiked	Before	3	All	Polymer Kit 1.0 PS	PS	large	Wizard	1	697.1	565.9	682.48	573.46	Yes	No	PS300PLUS_10	96.73	PS300PLUS_10	96.73	No	T4_PS_Large_Before_Wz		yes
2021-05-19	Spiked	Before	3	All	Polymer Kit 1.0 PS	PS	large	Wizard	2	548.2	365.6	564.82	478.21	Yes	No	PS300PLUS_10	99.02	PS300PLUS_10	99.02	No	T4_PS_Large_Before_Wz		yes
2021-05-19	Spiked	Before	3	All	Polymer Kit 1.0 PS	PS	large	Wizard	3	589.8	369	610.04	458.46	Yes	No	PS300PLUS_10	97.49	PS300PLUS_10	97.49	No	T4_PS_Large_Before_Wz		yes
2021-05-19	Spiked	Before	3	All	Polymer Kit 1.0 PS	PS	large	Wizard	4	736	367.6	727.95	562.84	Yes	No	PS300PLUS_10	98.95	PS300PLUS_10	98.95	No	T4_PS_Large_Before_Wz		yes
2021-05-19	Spiked	Before	3	All	Polymer Kit 1.0 PS	PS	large	Wizard	5	642.2	454	635.5	487.81	Yes	No	PS 300 PLUS 2	97.94	PS 300 PLUS 2	97.94	No	T4_PS_Large_Before_Wz		yes
2021-05-19	Spiked	Before	3	All	Polymer Kit 1.0 PS	PS	large	Wizard	6,7	144.7	55	516.84	306.21	Yes	No	PS 300 PLUS 3	99.68	PS 300 PLUS 3	99.68	No	T4_PS_Large_Before_Wz		yes
2021-05-19	Spiked	Before	3	All	Polymer Kit 1.0 PS	PS	large	Wizard	8	731.8	411.2	694.07	404.43	Yes	No	PS300PLUS_10	97.17	PS300PLUS_10	97.17	No	T4_PS_Large_Before_Wz		yes
2021-05-19	Spiked	Before	3	All	Polymer Kit 1.0 PS	PS	large	Wizard	9	426.3	270.5	429.24	339.9	Yes	No	PS300PLUS_10	99.13	PS300PLUS_10	99.13	No	T4_PS_Large_Before_Wz		yes
2021-05-19	Spiked	Before	3	All	Polymer Kit 1.0 PS	PS	large	Wizard	10	1021.2	433.6	985.76	627.84	Yes	No	PS300PLUS_10	98.55	PS300PLUS_10	98.55	No	T4_PS_Large_Before_Wz		yes
2021-05-19	Spiked	Before	3	All	Polymer Kit 1.0 PS	PS	large	Wizard	11	0	0	535.52	529.72	Yes	No	PS300PLUS_10	99.47	PS300PLUS_10	99.47	No	T4_PS_Large_Before_Wz		yes
2021-05-24	Spiked	Before	3	All	Polymer Kit 1.0 PS	PS	medium	Wizard	1	225.1	124.8	208.02	150.91	Yes	No	PS 100-300 5	99.57	PS 100-300 5	99.57	No	T4_PS_Medium_Before_Wz		yes
2021-05-24	Spiked	Before	3	All	Polymer Kit 1.0 PS	PS	medium	Wizard	2,3	234.7	150.7	253.06	188.22	Yes	No	PS 100-300 5	99.66	PS 100-300 5	99.66	No	T4_PS_Medium_Before_Wz		yes
2021-05-24	Spiked	Before	3	All	Polymer Kit 1.0 PS	PS	medium	Wizard	4	106.4	42	161.2	114.92	Yes	No	PS_GFPOWDER_SS2_3	98.54	PS_GFPOWDER_SS2_3	98.54	No	T4_PS_Medium_Before_Wz		yes
2021-05-24	Spiked	Before	3	All	Polymer Kit 1.0 PS	PS	medium	Wizard	5	221	124.2	214.82	177.14	Yes	No	PS 100-300 5	99.61	PS 100-300 5	99.61	No	T4_PS_Medium_Before_Wz		yes
2021-05-24	Spiked	Before	3	All	Polymer Kit 1.0 PS	PS	medium	Wizard	6	325.5	142.9	334.95	283	Yes	No	PS300PLUS_7	99.72	PS300PLUS_7	99.72	No	T4_PS_Medium_Before_Wz		yes
2021-05-24	Spiked	Before	3	All	Polymer Kit 1.0 PS	PS	medium	Wizard	7	349.5	223.8	369.04	237.23	Yes	No	PS300PLUS_9	99.86	PS300PLUS_9	99.86	No	T4_PS_Medium_Before_Wz		yes
2021-05-24	Spiked	Before	3	All	Polymer Kit 1.0 PS	PS	medium	Wizard	8a	475.2	290.6	338.1	346.56	Yes	No	PS 100 - 300 4	99.55	PS 100 - 300 4	99.55	No	T4_PS_Medium_Before_Wz		yes
2021-05-24	Spiked	Before	3	All	Polymer Kit 1.0 PS	PS	medium	Wizard	8b	475.2	290.6	225.7	142.01	Yes	No	PS 100 - 300 4	99.55	PS 100 - 300 4	99.55	No	T4_PS_Medium_Before_Wz		yes
2021-05-24	Spiked	Before	3	All	Polymer Kit 1.0 PS	PS	medium	Wizard	9,10,11	352.8	180.9	304.62	252.49	Yes	No	PS_CI_hard_a	99.69	PS_CI_hard_a	99.69	No	T4_PS_Medium_Before_Wz		yes
2021-05-24	Spiked	Before	3	All	Polymer Kit 1.0 PS	PS	medium	Wizard	12	133.8	71.4	135.19	62.39	Yes	No	Unidentified	0	Unidentified	0	No	T4_PS_Medium_Before_Wz		yes
2021-05-24	Spiked	Before	3	All	Polymer Kit 1.0 PS	PS	medium	Wizard	13	0	0	412.07	270.01	Yes	No	PS300PLUS_8	99.89	PS300PLUS_8	99.89	No	T4_PS_Medium_Before_Wz		yes
2021-05-24	Spiked	Before	3	All	Polymer Kit 1.0 PS	PS	medium	Wizard	14	315.6	144.6	325.19	174.85	Yes	No	PS_GFPOWDER_SS2_2	99.62	PS_GFPOWDER_SS2_2	99.62	No	T4_PS_Medium_Before_Wz		yes
2021-05-24	Spiked	Before	3	All	Polymer Kit 1.0 PS	-	medium	Wizard	1-31, 33-39, 49-52	-	-	-	-	-	-	-	-	-	-	No	T4_PS_Medium_Before_Wz		No
2021-05-19	Spiked	Before	3	All	Polymer Kit 1.0 PA6	Nylon	large	Wizard	40	663.7	260	669.09	344.51	Yes	No	NYLON 100-300 2	99.58	NYLON 100-300 2	99.58	No	T4_Nylon_Large_Before_Wz		yes
2021-05-19	Spiked	Before	3	All	Polymer Kit 1.0 PA6	Nylon	large	Wizard	41	830.4	511.4	699.08	597.19	Yes	No	NYLON 300 PLUS 1	99.32	NYLON 300 PLUS 1	99.32	No	T4_Nylon_Large_Before_Wz		yes
2021-05-19	Spiked	Before	3	All	Polymer Kit 1.0 PA6	Nylon	large	Wizard	42	810.3	464.7	769.48	452.97	Yes	No	NYLON 300 PLUS 2	91.66	NYLON 300 PLUS 2	91.66	No	T4_Nylon_Large_Before_Wz		yes
2021-05-19	Spiked	Before	3	All	Polymer Kit 1.0 PA6	Nylon	large	Wizard	44	558.9	355.9	545.48	347.69	Yes	No	NYLON 300 PLUS 4	99.47	NYLON 300 PLUS 4	99.47	No	T4_Nylon_Large_Before_Wz		yes
2021-05-19	Spiked	Before	3	All	Polymer Kit 1.0 PA6	Nylon	large	Wizard	45	834.1	497	716.48	547.64	Yes	No	NYLON 300 PLUS 1	98.46	NYLON 300 PLUS 1	98.46	No	T4_Nylon_Large_Before_Wz		yes
2021-05-19	Spiked	Before	3	All	Polymer Kit 1.0 PA6	Nylon	large	Wizard	46	684.2	468.9	632.63	446.43	Yes	No	NYLON 300 PLUS 1	99.09	NYLON 300 PLUS 1	99.09	No	T4_Nylon_Large_Before_Wz		yes
2021-05-19	Spiked	Before	3	All	Polymer Kit 1.0 PA6	Nylon	large	Wizard	47	825.3	692.9	733.25	674.48	Yes	No	NYLON 300 PLUS 3	93.98	NYLON 300 PLUS 3	93.98	No	T4_Nylon_Large_Before_Wz		yes
2021-05-19	Spiked	Before	3	All	Polymer Kit 1.0 PA6	Nylon	large	Wizard	48	640.4	372.7	599.61	420.36	Yes	No	NYLON6300PLUS_7	99.75	NYLON6300PLUS_7	99.75	No	T4_Nylon_Large_Before_Wz		yes
2021-05-19	Spiked	Before	3	All	Polymer Kit 1.0 PA6	Nylon	large	Wizard	32	1058.1	512.6	728.55	534.01	Yes	No	NYLON 300 PLUS 1	97.97	NYLON 300 PLUS 1	97.97	No	T4_Nylon_Large_Before_Wz		yes
2021-05-19	Spiked	Before	3	All	Polymer Kit 1.0 PA6	Nylon	large	Wizard	39	1117.9	624.6	974.66	664.44	Yes	No	NYLON 300 PLUS 3	98.6	NYLON 300 PLUS 3	98.6	No	T4_Nylon_Large_Before_Wz		yes
2021-05-25	Spiked	Before	3	All	Polymer Kit 1.0 PA6	Nylon	medium	Point and Shoot	1	-	-	319.52	243.11	Yes	No	NYLON 100-300 2	98.63	NYLON 100-300 2	98.63	No	T4_Nylon_Medium_PointandShoot	P&S numbering	yes
2021-05-25	Spiked	Before	3	All	Polymer Kit 1.0 PA6	Nylon	medium	Point and Shoot	2	-	-	297.97	282.93	Yes	No	NYLON 100-300 2	99.33	NYLON 100-300 2	99.33	No	T4_Nylon_Medium_PointandShoot	P&S numbering	yes
2021-05-25	Spiked	Before	3	All	Polymer Kit 1.0 PA6	Nylon	medium	Point and Shoot	3	-	-	455.51	374.1	Yes	No	NYLON6300PLUS 7	97.83	NYLON6300PLUS 7	97.83	No	T4_Nylon_Medium_PointandShoot	P&S numbering	yes
2021-05-25	Spiked	Before	3	All	Polymer Kit 1.0 PA6	Nylon	medium	Point and Shoot	4	-	-	249.64	238.06	Yes	No	NYLON6300PLUS 7	97.83	NYLON6300PLUS 7	97.83	No	T4_Nylon_Medium_PointandShoot	P&S numbering	yes
2021-05-25	Spiked	Before	3	All	Polymer Kit 1.0 PA6	Nylon	medium	Point and Shoot	5	-	-	288.18	297.41	Yes	No	NYLON6300PLUS 7	97.83	NYLON6300PLUS 7	97.83	No	T4_Nylon_Medium_PointandShoot	P&S numbering	yes
2021-05-25	Spiked	Before	3	All	Polymer Kit 1.0 PA6	Nylon	medium	Point and Shoot	6	-	-	288.7	256.53	Yes	No	NYLON6300PLUS 7	97.83	NYLON6300PLUS 7	97.83	No	T4_Nylon_Medium_PointandShoot	P&S numbering	yes
2021-05-25	Spiked	Before	3	All	Polymer Kit 1.0 PA6	Nylon	medium	Point and Shoot	7	-	-	330.19	237.87	Yes	No	NYLON6300PLUS 7	97.83	NYLON6300PLUS 7	97.83	No	T4_Nylon_Medium_PointandShoot	P&S numbering	yes
2021-05-25	Spiked	Before	3	All	Polymer Kit 1.0 PA6	Nylon	medium	Point and Shoot	8	-	-	407.65	338.4	Yes	No	NYLON 100-300 2	99.7	NYLON 100-300 2	99.7	No	T4_Nylon_Medium_PointandShoot	P&S numbering	yes
2021-05-25	Spiked	Before	3	All	Polymer Kit 1.0 PA6	Nylon	medium	Point and Shoot	9	-	-	211.71	183.87	Yes	No	NYLON 100-300 2	99.69	NYLON 100-300 2	99.69	No	T4_Nylon_Medium_PointandShoot	P&S numbering	yes
2021-05-25	Spiked	Before	3	All	Polymer Kit 1.0 PA6	Nylon	medium	Point and Shoot	10	-	-	163.5	120	Yes	No	NYLON 100-300 2	99.54	NYLON 100-300 2	99.54	No	T4_Nylon_Medium_PointandShoot	P&S numbering	yes
2021-05-18	Spiked	Before	3	All	Polymer Kit 1.0 HDPE.1	HDPE	large	Wizard	1	569.7	340.3	556.28	415.12	Yes	No	HDPE 300 PLUS 1	99.64	HDPE 300 PLUS 1	99.64	No	T4_HDPE_Large_Before_Wz		yes
2021-05-18	Spiked	Before	3	All	Polymer Kit 1.0 HDPE.1	-	large	Wizard	2	-	-	-	-	-	-	-	-	-	-	-	T4_HDPE_Large_Before_Wz	-	No
2021-05-18	Spiked	Before	3	All	Polymer Kit 1.0 HDPE.1	HDPE	large	Wizard	5,6	635.3	151.5	558.55	287.13	Yes	No	PE_GF_powder_d	99.46	PE_GF_powder_d	99.46	No	T4_HDPE_Large_Before_Wz		yes
2021-05-18	Spiked	Before	3	All	Polymer Kit 1.0 HDPE.1	HDPE	large	Wizard	3	642.7	268.8	631.48	278.58	Yes	No	PE_GF_powder_d	98.58	PE_GF_powder_d	98.58	No	T4_HDPE_Large_Before_Wz		yes
2021-05-18	Spiked	Before	3	All	Polymer Kit 1.0 HDPE.1	HDPE	large	Wizard	4	813.1	274.1	803.51	318.01	Yes	No	HDPE 300 PLUS 1	99.45	HDPE 300 PLUS 1	99.45	No	T4_HDPE_Large_Before_Wz		yes
2021-05-18	Spiked	Before	3	All	Polymer Kit 1.0 HDPE.1	HDPE	large	Wizard	7,8,9,16	27.9	21	2058.78	650.09	Yes	No	HDPE 300 PLUS 1	99.32	HDPE 300 PLUS 1	99.32	No	T4_HDPE_Large_Before_Wz		yes
2021-05-18	Spiked	Before	3	All	Polymer Kit 1.0 HDPE.1	HDPE	large	Wizard	10,11	142.2	70.5	942.56	579.18	Yes	No	HDPE 100-300 2	95.02	HDPE 100-300 2	95.02	No	T4_HDPE_Large_Before_Wz		yes
2021-05-18	Spiked	Before	3	All	Polymer Kit 1.0 HDPE.1	HDPE	large	Wizard	12,13	106.8	58.5	348.82	185.16	Yes	No	PE_GF_POWDER_SS1_4	99.15	PE_GF_POWDER_SS1_4	99.15	No	T4_HDPE_Large_Before_Wz		yes
2021-05-18	Spiked	Before	3	All	Polymer Kit 1.0 HDPE.1	HDPE	large	Wizard	14,18	1938.6	749.7	1652.55	741.53	Yes	No	HDPE300PLUS_7	99.72	HDPE300PLUS_7	99.72	No	T4_HDPE_Large_Before_Wz		yes
2021-05-18	Spiked	Before	3	All	Polymer Kit 1.0 HDPE.1	HDPE	large	Wizard	15	1658.8	798.2	1379.96	817.92	Yes	No	HDPE300PLUS_8	99.71	HDPE300PLUS_8	99.71	No	T4_HDPE_Large_Before_Wz		yes
2021-05-18	Spiked	Before	3	All	Polymer Kit 1.0 HDPE.1	HDPE	large	Wizard	17	1352.6	606	1321.06	479.78	Yes	No	HDPE 300 PLUS 1	98	HDPE 300 PLUS 1	98	No	T4_HDPE_Large_Before_Wz		yes
2021-05-24	Spiked	Before	3	All	Polymer Kit 1.0 HDPE.1	HDPE	medium	Wizard	1	331.7	136.1	268.27	178.88	Yes	No	HDPE 53-100 3	98.47	HDPE 53-100 3	98.47	No	T4_HDPE_Medium_Before_Wz		yes
2021-05-24	Spiked	Before	3	All	Polymer Kit 1.0 HDPE.1	HDPE	medium	Wizard	2	560.6	169.3	413.25	233.17	Yes	No	CPE_WhB_b	99.19	CPE_WhB_b	99.19	No	T4_HDPE_Medium_Before_Wz		yes
2021-05-24	Spiked	Before	3	All	Polymer Kit 1.0 HDPE.1	HDPE	medium	Wizard	3	349.8	205.8	193.12	152.94	Yes	No	CPE_WhB_b	99.03	CPE_WhB_b	99.03	No	T4_HDPE_Medium_Before_Wz		yes
2021-05-24	Spiked	Before	3	All	Polymer Kit 1.0 HDPE.1	HDPE	medium	Wizard	4	108.7	32.9	266.21	158.38	Yes	No	HDPE 100-300 4	92	HDPE 100-300 4	92	No	T4_HDPE_Medium_Before_Wz		yes
2021-05-24	Spiked	Before	3	All	Polymer Kit 1.0 HDPE.1	HDPE	medium	Wizard	5	307.3	171	131.26	90.2	Yes	No	PE_GF_powder_d	99.55	PE_GF_powder_d	99.55	No	T4_HDPE_Medium_Before_Wz		yes
2021-05-24	Spiked	Before	3	All	Polymer Kit 1.0 HDPE.1	HDPE	medium	Wizard	6	369.8	194.1	272	248.63	Yes	No	PE_GF_powder_e	99.49	PE_GF_powder_e	99.49	No	T4_HDPE_Medium_Before_Wz		yes
2021-05-24	Spiked	Before	3	All	Polymer Kit 1.0 HDPE.1	HDPE	medium	Wizard	7	169.9	125.7	295.73	182.34	Yes	No	CPE_WhB_a	98.54	CPE_WhB_a	98.54	No	T4_HDPE_Medium_Before_Wz		yes
2021-05-24	Spiked	Before	3	All	Polymer Kit 1.0 HDPE.1	HDPE	medium	Wizard	8	465.5	258.5	304.57	209.35	Yes	No	LDPE_SIGMA_181897	98.32	LDPE_SIGMA_181897	98.32	No	T4_HDPE_Medium_Before_Wz		yes
2021-05-24	Spiked	Before	3	All	Polymer Kit 1.0 HDPE.1	HDPE	medium	Wizard	9	304.1	153.9	321.68	229.79	Yes	No	CPE_WhB_a	98.92	CPE_WhB_a	98.92	No	T4_HDPE_Medium_Before_Wz		yes
2021-05-24	Spiked	Before	3	All	Polymer Kit 1.0 HDPE.1	HDPE	medium	Wizard	10	0	0	510.73	157.21	Yes	No	PE_GF_powder_d	99.68	PE_GF_powder_d	99.68	No	T4_HDPE_Medium_Before_Wz		yes
2021-05-19	Spiked	Before	3	All	Polymer Kit 1.0 CR	CR	large	Wizard	1	1955.4	980.2	1883.07	1282.73	Yes	No	CRUMB RUBBER 300 PLUS 4	97.84	CRUMB RUBBER 300 PLUS 4	97.84	No	T4_CR_Large_Before_Wz		yes
2021-05-19	Spiked	Before	3	All	Polymer Kit 1.0 CR	CR	large	Wizard	2	54	52.9	1952.8	1150.34	Yes	No	CR300PLUS_6	91.76	CR300PLUS_6	91.76	No	T4_CR_Large_Before_Wz		yes
2021-05-19	Spiked	Before	3	All	Polymer Kit 1.0 CR	CR	large	Wizard	3	1553	1053	1378.93	1335.63	Yes	No	CRUMB RUBBER 300 PLUS 1	99.17	CRUMB RUBBER 300 PLUS 1	99.17	No	T4_CR_Large_Before_Wz		yes
2021-05-19	Spiked	Before	3	All	Polymer Kit 1.0 CR	CR	large	Wizard	4	329.4	150.3	342.03	194.89	Yes	No	CR300PLUS_9	98.49	CR300PLUS_9	98.49	No	T4_CR_Large_Before_Wz		yes
2021-05-19	Spiked	Before	3	All	Polymer Kit 1.0 CR	CR	large	Wizard	5	2261.2	1401.8	2020.96	1315.7	Yes	No	CRUMB RUBBER 300 PLUS 5	98.7	CRUMB RUBBER 300 PLUS 5	98.7	No	T4_CR_Large_Before_Wz		yes
2021-05-19	Spiked	Before	3	All	Polymer Kit 1.0 CR	CR	large	Wizard	6a	4858.2	1397.5	2061.63	1147.2	Yes	No	CRUMB RUBBER 300 PLUS 5	97.87	CRUMB RUBBER 300 PLUS 5	97.87	No	T4_CR_Large_Before_Wz		yes
2021-05-19	Spiked	Before	3	All	Polymer Kit 1.0 CR	CR	large	Wizard	6b	4858.2	1397.5	1677.7	1104.19	Yes	No	CR300PUS3	54.32	CR300PUS3	54.32	No	T4_CR_Large_Before_Wz		yes
2021-05-19	Spiked	Before	3	All	Polymer Kit 1.0 CR	CR	large	Wizard	7	1938.3	1311.2	1778.28	1224.41	Yes	No	CR300PLUS_6	98.98	CR300PLUS_6	98.98	No	T4_CR_Large_Before_Wz		yes
2021-05-19	Spiked	Before	3	All	Polymer Kit 1.0 CR	CR	large	Wizard	8	2289	1271.3	2294.95	1392.37	Yes	No	CR300PLUS_7	98.98	CR300PLUS_7	98.98	No	T4_CR_Large_Before_Wz		yes
2021-05-19	Spiked	Before	3	All	Polymer Kit 1.0 CR	CR	large	Wizard	9	2124.7	1589.6	2124.83	2023.01	Yes	No	CR300PLUS_6	98.22	CR300PLUS_6	98.22	No	T4_CR_Large_Before_Wz		yes
2021-05-19	Spiked	Before	3	All	Polymer Kit 1.0 CR	CR	large	Wizard	10a	0	0	2059.35	796.55	Yes	No	CRUMB RUBBER 300 PLUS 5	98.85	CRUMB RUBBER 300 PLUS 5	98.85	No	T4_CR_Large_Before_Wz		yes
2021-05-19	Spiked	Before	3	All	Polymer Kit 1.0 CR	CR	large	Wizard	10b	0	0	700.88	648.25	Yes	No	PVC_GF_SS11	82.3	PVC_GF_SS11	82.3	No	T4_CR_Large_Before_Wz		yes
2021-05-25	Spiked	Before	3	All	Polymer Kit 1.0 CR	CR	medium	Wizard	1	137.9	26.9	621.7	268.04	Yes	No	CR300PLUS_11	99.37	CR300PLUS_11	99.37	No	T4_CR_Medium_Before_Wz		yes
2021-05-25	Spiked	Before	3	All	Polymer Kit 1.0 CR	CR	medium	Wizard	2	639.9	267.1	313.62	169.61	Yes	No	CR300PLUS_9	98.19	CR300PLUS_9	98.19	No	T4_CR_Medium_Before_Wz		yes
2021-05-25	Spiked	Before	3	All	Polymer Kit 1.0 CR	CR	medium	Wizard	3	349.7	163	68.12	66.41	No	No	CR300PLUS_9	97.51	CR300PLUS_9	97.51	No	T4_CR_Medium_Before_Wz		yes
2021-05-25	Spiked	Before	3	All	Polymer Kit 1.0 CR	CR	medium	Wizard	4	301.6	96.5	287	141.69	Yes	No	CRUMB RUBBER 53-100 PLUS 1	98.65	CRUMB RUBBER 53-100 PLUS 1	98.65	No	T4_CR_Medium_Before_Wz		yes
2021-05-25	Spiked	Before	3	All	Polymer Kit 1.0 CR	CR	medium	Wizard	5	216.2	98.7	216.28	87.31	Yes	No	CRUMB RUBBER 300 PLUS 4	94.65	CRUMB RUBBER 300 PLUS 4	94.65	No	T4_CR_Medium_Before_Wz		yes
2021-05-25	Spiked	Before	3	All	Polymer Kit 1.0 CR	CR	medium	Wizard	6	293.4	188.9	290.73	188.31	Yes	No	CRUMB RUBBER 53-100 4	95.7	CRUMB RUBBER 53-100 4	95.7	No	T4_CR_Medium_Before_Wz		yes
2021-05-25	Spiked	Before	3	All	Polymer Kit 1.0 CR	CR	medium	Wizard	7	124	81	124.36	134.03	Yes	No	CRUMB RUBBER 53-100 5	97.13	CRUMB RUBBER 53-100 5	97.13	No	T4_CR_Medium_Before_Wz		yes
2021-05-25	Spiked	Before	3	All	Polymer Kit 1.0 CR	CR	medium	Wizard	8	56.6	31	245.68	159.82	Yes	No	CRUMB RUBBER 53-100 4	98.47	CRUMB RUBBER 53-100 4	98.47	No	T4_CR_Medium_Before_Wz		yes
2021-05-25	Spiked	Before	3	All	Polymer Kit 1.0 CR	CR	medium	Wizard	9	74.1	62.2	214.25	134.33	Yes	No	CRUMB RUBBER 53-100 4	97.14	CRUMB RUBBER 53-100 4	97.14	No	T4_CR_Medium_Before_Wz		yes
2021-05-25	Spiked	Before	3	All	Polymer Kit 1.0 CR	CR	medium	Wizard	10	31.1	22	91.25	73.89	No	No	CRUMB RUBBER 53-100 4	95.9	CRUMB RUBBER 53-100 4	95.9	No	T4_CR_Medium_Before_Wz		yes
2021-05-25	Spiked	Before	3	All	Polymer Kit 1.0 CR	CR	medium	Wizard	11	25.9	21.1	34.85	28.75	No	No	CRUMB RUBBER 53-100 4	95.9	-		Yes	T4_CR_Medium_Before_Wz		yes
2021-05-25	Spiked	Before	3	All	Polymer Kit 1.0 CR	CR	medium	Wizard	13	252.1	137.3	33.56	25.93	No	No	CRUMB RUBBER 53-100 PLUS 1	98.47			Yes	T4_CR_Medium_Before_Wz		yes
2021-05-25	Spiked	Before	3	All	Polymer Kit 1.0 CR	CR	medium	Wizard	14	233.8	105	52.54	26.66	No	No	CR300PLUS_9	97.74			Yes	T4_CR_Medium_Before_Wz		yes
2021-05-25	Spiked	Before	3	All	Polymer Kit 1.0 CR	CR	medium	Wizard	15	39.9	23.2	52.75	33.27	No	No	CRUMB RUBBER 53-100 PLUS 1	98.44			No	T4_CR_Medium_Before_Wz		yes
2021-05-25	Spiked	Before	3	All	Polymer Kit 1.0 CR	CR	medium	Wizard	16	83.9	57.2	92.15	51.93	No	No	CRUMB RUBBER 53-100 4	98.15			No	T4_CR_Medium_Before_Wz		yes
2021-05-25	Spiked	Before	3	All	Polymer Kit 1.0 CR	CR	medium	Wizard	17a	31.6	29.6	271.89	141.99	Yes	No	CRUMB RUBBER 53-100 4	99.04			No	T4_CR_Medium_Before_Wz		yes
2021-05-25	Spiked	Before	3	All	Polymer Kit 1.0 CR	CR	Medium	Wizard	17b	31.6	29.6	87.76	27.26	No	No	CRUMB RUBBER 53-100 4	98.09			No	T4_CR_Medium_Before_Wz		yes
2021-05-25	Spiked	Before	3	All	Polymer Kit 1.0 CR	CR	medium	Wizard	18	40.2	23.5	345.26	178.46	Yes	No	CRUMB RUBBER 53-100 4	98.34			Yes	T4_CR_Medium_Before_Wz		yes
2021-05-25	Spiked	Before	3	All	Polymer Kit 1.0 CR	CR	medium	Wizard	19	74.7	55.8	512.6	206.74	Yes	No	CRUMB RUBBER 53-100 4	98.8			No	T4_CR_Medium_Before_Wz		yes
2021-05-25	Spiked	Before	3	All	Polymer Kit 1.0 CR	CR	medium	Wizard	20	60.3	13.1	184.23	143.25	Yes	No	Unidentified	0			Yes	T4_CR_Medium_Before_Wz		yes
2021-05-25	Spiked	Before	3	All	Polymer Kit 1.0 CR	CR	Medium	Wizard	21	53	27.2	60	62.72	No	No	CRUMB RUBBER 53-100 4	97.66			No	T4_CR_Medium_Before_Wz		yes
2021-05-25	Spiked	Before	3	All	Polymer Kit 1.0 CR	CR	medium	Wizard	22	93.8	52.1	100.13	54.22	Yes	No	CRUMB RUBBER 53-100 4	98.77			No	T4_CR_Medium_Before_Wz		yes
2021-05-25	Spiked	Before	3	All	Polymer Kit 1.0 CR	CR	medium	Wizard	23	315.5	150.6	67.26	50.15	No	No	CRUMB RUBBER 53-100 5	99.36			No	T4_CR_Medium_Before_Wz		yes
2021-05-25	Spiked	Before	3	All	Polymer Kit 1.0 CR	CR	medium	Wizard	24	92	48.9	61.28	40.16	No	No	CRUMB RUBBER 53-100 PLUS 1	98.58			No	T4_CR_Medium_Before_Wz		yes
2021-05-25	Spiked	Before	3	All	Polymer Kit 1.0 CR	CR	medium	Wizard	25	51.7	30.7	245.6	92.48	Yes	No	CRUMB RUBBER 53-100 4	98.49			Yes	T4_CR_Medium_Before_Wz		yes
2021-05-25	Spiked	Before	3	All	Polymer Kit 1.0 CR	CR	medium	Wizard	26	77.3	49.2	203.3	80.96	Yes	No	CRUMB RUBBER 53-100 5	98.4			No	T4_CR_Medium_Before_Wz		yes
2021-05-25	Spiked	Before	3	All	Polymer Kit 1.0 CR	CR	medium	Wizard	27	57.8	26.3	68.56	31.27	No	No	CRUMB RUBBER 53-100 4	97.69			Yes	T4_CR_Medium_Before_Wz		yes
2021-05-25	Spiked	Before	3	All	Polymer Kit 1.0 CR	CR	medium	Wizard	28	60.3	41.4	52.87	43.73	No	No	CRUMB RUBBER 53-100 PLUS 1	97.97			No	T4_CR_Medium_Before_Wz		yes
2021-05-25	Spiked	Before	3	All	Polymer Kit 1.0 CR	CR	medium	Wizard	29	26.5	20.2	53.44	20.41	No	No	Microvice_a	93.74			No	T4_CR_Medium_Before_Wz		yes
2021-05-25	Spiked	Before	3	All	Polymer Kit 1.0 CR	CR	medium	Wizard	30	219.1	94.7	28.86	39.06	No	No	CRUMB RUBBER 53-100 PLUS 1	98.55			No	T4_CR_Medium_Before_Wz		yes
2021-05-25	Spiked	Before	3	All	Polymer Kit 1.0 CR	CR	medium	Wizard	31	501.9	203	63.93	25.59	No	No	CRUMB RUBBER 53-100 4	97.57			No	T4_CR_Medium_Before_Wz		yes
2021-05-25	Spiked	Before	3	All	Polymer Kit 1.0 CR	CR	medium	Wizard	32	195.8	53.6	58.58	48.32	No	No	CR300PLUS_9	98.18			No	T4_CR_Medium_Before_Wz		yes
2021-05-25	Spiked	Before	3	All	Polymer Kit 1.0 CR	CR	medium	Wizard	33	65.5	46.3	56.64	30.96	No	No	CR300PLUS_9	89.09			No	T4_CR_Medium_Before_Wz		yes
2021-05-25	Spiked	Before	3	All	Polymer Kit 1.0 CR	CR	medium	Wizard	34	189.5	139	39.39	31.08	No	No	CR300PLUS_9	98.65			No	T4_CR_Medium_Before_Wz		yes
2021-05-25	Spiked	Before	3	All	Polymer Kit 1.0 CR	CR	medium	Wizard	35	361.7	208.6	25.46	8.6	No	No	CR300PLUS_11	99.36			Yes	T4_CR_Medium_Before_Wz		yes
2021-05-25	Spiked	Before	3	All	Polymer Kit 1.0 CR	CR	medium	Wizard	36	49.1	37.7	35.22	13.21	No	No	CRUMB RUBBER 53-100 4	98.65			No	T4_CR_Medium_Before_Wz		yes
2021-05-25	Spiked	Before	3	All	Polymer Kit 1.0 CR	CR	medium	Wizard	37	37.4	28.6	28.99	22.52	No	No	CRUMB RUBBER 53-100 4	98.19			No	T4_CR_Medium_Before_Wz		yes
2021-05-25	Spiked	Before	3	All	Polymer Kit 1.0 CR	CR	medium	Wizard	38	0	0	108.12	39.07	Yes	No	CRUMB RUBBER 53-100 4	98.2			No	T4_CR_Medium_Before_Wz		yes
2021-05-25	Spiked	Before	3	All	Polymer Kit 1.0 CR	CR	medium	Point and Shoot	39	-	-	25	9.84	No	No	CRUMB RUBBER 53-100 PLUS 1	25.85			No	T4_CR_Medium_PointandShoot		yes
2021-05-25	Spiked	Before	3	All	Polymer Kit 1.0 CR	CR	medium	Point and Shoot	40	-	-	43.71	20.26	No	No	CRUMB RUBBER 300 PLUS 1	25.57			No	T4_CR_Medium_PointandShoot		yes
2021-05-25	Spiked	Before	3	All	Polymer Kit 1.0 CR	CR	medium	Point and Shoot	41	-	-	40.91	16.08	No	No	CRUMB RUBBER 300 PLUS 1	34.2			No	T4_CR_Medium_PointandShoot		yes
2021-05-25	Spiked	Before	3	All	Polymer Kit 1.0 CR	CR	medium	Point and Shoot	42	-	-	29.87	10.88	No	No	CRUMB RUBBER 300 PLUS 1	14.78			No	T4_CR_Medium_PointandShoot		yes
2021-05-26	Spiked	Before	3	All	Polymer Kit 1.0 PEST	PEST	Fiber	Point and Shoot	1	-	-	5040	26.31	Yes	No	POLYESTER	91.35	POLYESTER	91.35	Yes	T4_PEST_Fiber_PointandShoot	Wizard map is corrupted, only able to check match and measurments from P&S	yes
2021-05-26	Spiked	Before	3	All	Polymer Kit 1.0 PEST	PEST	Fiber	Point and Shoot	2	-	-	1947.26	20.18	Yes	No	POLYESTER	91.35	POLYESTER	91.35	Yes	T4_PEST_Fiber_PointandShoot	Wizard map is corrupted, only able to check match and measurments from P&S	yes
2021-05-26	Spiked	Before	3	All	Polymer Kit 1.0 PEST	PEST	Fiber	Point and Shoot	3	-	-	2912.4	13.22	Yes	No	POLYESTER	91.35	POLYESTER	91.35	Yes	T4_PEST_Fiber_PointandShoot	Wizard map is corrupted, only able to check match and measurments from P&S	yes
2021-05-26	Spiked	Before	3	All	Polymer Kit 1.0 PEST	PEST	Fiber	Point and Shoot	4	-	-	3843	24.64	Yes	No	POLYESTER	91.35	POLYESTER	91.35	Yes	T4_PEST_Fiber_PointandShoot	Wizard map is corrupted, only able to check match and measurments from P&S	yes
2021-05-26	Spiked	Before	3	All	Polymer Kit 1.0 PEST	PEST	Fiber	Point and Shoot	5	-	-	595.44	24.31	Yes	Yes	POLYESTER	91.35	POLYESTER	91.35	No	T4_PEST_Fiber_PointandShoot	Wizard map is corrupted, only able to check match and measurments from P&S	yes
2021-05-26	Spiked	Before	3	All	Polymer Kit 1.0 PEST	PEST	Fiber	Point and Shoot	6	-	-	4197.59	26.06	Yes	No	POLYESTER	91.35	POLYESTER	91.35	Yes	T4_PEST_Fiber_PointandShoot	Wizard map is corrupted, only able to check match and measurments from P&S	yes
2021-05-26	Spiked	Before	3	All	Polymer Kit 1.0 PEST	PEST	Fiber	Point and Shoot	7	-	-	2905.07	20.55	Yes	No	POLYESTER	91.35	POLYESTER	91.35	Yes	T4_PEST_Fiber_PointandShoot	Wizard map is corrupted, only able to check match and measurments from P&S	yes
2021-05-26	Spiked	Before	3	All	Polymer Kit 1.0 PEST	PEST	Fiber	Point and Shoot	8	-	-	1905.06	46.95	Yes	No	POLYESTER	91.35	POLYESTER	91.35	Yes	T4_PEST_Fiber_PointandShoot	Wizard map is corrupted, only able to check match and measurments from P&S	yes
2021-05-26	Spiked	Before	3	All	Polymer Kit 1.0 PEST	PEST	Fiber	Point and Shoot	9	-	-	1714.63	48.97	Yes	No	POLYESTER	91.35	POLYESTER	91.35	Yes	T4_PEST_Fiber_PointandShoot	Wizard map is corrupted, only able to check match and measurments from P&S	yes
2021-05-26	Spiked	Before	3	All	Polymer Kit 1.0 PEST	PEST	Fiber	Point and Shoot	10	-	-	1634.41	32.63	Yes	No	POLYESTER	91.35	POLYESTER	91.35	Yes	T4_PEST_Fiber_PointandShoot	Wizard map is corrupted, only able to check match and measurments from P&S	yes
2021-05-26	Spiked	Before	3	All	Top Premium King Size CA Cigarette Filters	CA	Fiber	Point ans Shoot	1	-	-	4651.26	25.28	Yes	Yes	CA 300 Plus 1	86.02	CA 300 Plus 1	86.02	Yes	T4_CA_Fiber_PointandShoot		yes
2021-05-26	Spiked	Before	3	All	Top Premium King Size CA Cigarette Filters	CA	Fiber	Point ans Shoot	2	-	-	3040.4	27.05	Yes	Yes	CA 300 Plus 1	91.44	CA 300 Plus 1	91.44	Yes	T4_CA_Fiber_PointandShoot		yes
2021-05-26	Spiked	Before	3	All	Top Premium King Size CA Cigarette Filters	CA	Fiber	Point ans Shoot	3	-	-	4078.05	19.88	Yes	Yes	CA 300 Plus 1	86.49	CA 300 Plus 1	86.49	Yes	T4_CA_Fiber_PointandShoot		yes
2021-05-26	Spiked	Before	3	All	Top Premium King Size CA Cigarette Filters	CA	Fiber	Point ans Shoot	4,5	-	-	3352.65	26.68	Yes	Yes	CA 300 Plus 1	92.25	CA 300 Plus 1	92.25	Yes	T4_CA_Fiber_PointandShoot		yes
2021-05-26	Spiked	Before	3	All	Top Premium King Size CA Cigarette Filters	CA	Fiber	Point ans Shoot	6	-	-	3514.76	26.86	Yes	Yes	CA 300 Plus 2	96.22	CA 300 Plus 2	96.22	Yes	T4_CA_Fiber_PointandShoot		yes
2021-05-26	Spiked	Before	3	All	Top Premium King Size CA Cigarette Filters	CA	Fiber	Point ans Shoot	7	-	-	2153.08	36.8	Yes	Yes	Cellulose Acetate Fiber 2	86.83	Cellulose Acetate Fiber 2	86.83	Yes	T4_CA_Fiber_PointandShoot	P&S numbering	yes
2021-05-26	Spiked	Before	3	All	Top Premium King Size CA Cigarette Filters	CA	Fiber	Wizard	8,10	735.8	37.2	2402.07	19.28	Yes	Yes	Cellulose Acetate Fiber 2	86.83	Cellulose Acetate Fiber 2	86.83	Yes	T4_CA_Fiber_Before_Wz		yes
2021-05-26	Spiked	Before	3	All	Top Premium King Size CA Cigarette Filters	CA	Fiber	Wizard	9	204.4	32.1	3515.8	38.82	Yes	Yes	Top Premium King Size CA Cigarette Filters	81.48	Top Premium King Size CA Cigarette Filters	81.48	Yes	T4_CA_Fiber_Before_Wz		yes
2021-07-08	Spiked	After	1	1	-	HDPE	Large	Point and shoot	1	1678.11	940.34	1678.11	940.34	Yes	No	HDPE300PLUS 7	93.17	HDPE300PLUS 7	93.17	No	T2_Spiked_After_Box1_Wz		yes
2021-07-08	Spiked	After	1	1	-	PVC	Large	Point and shoot	2	1574.69	1107.59	1574.69	1107.59	Yes	No	PVC300PLUS5	95.21	PVC300PLUS5	95.21	No	T2_Spiked_After_Box1_Wz	same as box #1 pt. 800 (wizard)	no
2021-07-08	Spiked	After	1	1	-	HDPE	Large	Point and shoot	3	390.87	243.16	390.87	243.16	Yes	No	PE GF powder e	95.87	PE GF powder e	95.87	No	T2_Spiked_After_Box1_Wz		yes
2021-07-08	Spiked	After	1	1	-	Nylon	Medium	Point and shoot	4	289.88	279.65	289.88	279.65	Yes	No	NYLON6300PLUS 7	95.78	NYLON6300PLUS 7	95.78	No	T2_Spiked_After_Box1_Wz		yes
2021-07-08	Spiked	After	1	1	-	Other	Large	Point and Shoot	5	-	-	-	-	Yes	No	Zinc Sulfide / Barium Sulfide Blend	55.85	Zinc Sulfide / Barium Sulfide Blend	55.85	No	T2_Spiked_After_Box1_Wz		-
2021-07-08	Spiked	After	1	1	-	Nylon	Large	Point and shoot	6	418.04	288.75	418.04	288.75	Yes	No	NYLON6300PLUS 7	97.51	NYLON6300PLUS 7	97.51	No	T2_Spiked_After_Box1_Wz		yes
2021-07-08	Spiked	After	1	1	-	Nylon	Medium	Point and shoot	7	95.1	395.21	395.21	284.18	Yes	No	NYLON6300PLUS 5	95.1	NYLON6300PLUS 5	95.1	yes	T2_Spiked_After_Box1_Wz		yes
2021-07-08	Spiked	After	1	1	-	PS	Large	Point and shoot	8	582.2	508.38	582.2	508.38	Yes	No	PS300PLUS 6	99.26	PS300PLUS 6	99.26	No	T2_Spiked_After_Box1_Wz		yes
2021-07-08	Spiked	After	1	1	-	Natural Material - cellulosic	Large	Point and Shoot	9	-	-	-	-	Yes	No	Low Density SBS Board Back Side	75.9	Low Density SBS Board Back Side	75.9	No	T2_Spiked_After_Box1_Wz		-
2021-07-08	Spiked	After	1	1	-	Natural Material - cellulosic	Large	Point and Shoot	10	-	-	-	-	Yes	No	Release Paper - release paper	69.71	Release Paper - release paper	69.71	No	T2_Spiked_After_Box1_Wz		-
2021-07-08	Spiked	After	1	1	-	-	Large	Point and Shoot	11	missing	missing			No	No	Poly(ethylene)	80.75	Poly(ethylene)	80.75	yes	T2_Spiked_After_Box1_Wz	very small Fibers, could not get a good measurment of them.	no
2021-07-08	Spiked	After	1	1	-	-	Large	Point and Shoot	12	missing	missing			No	No	Poly(ethylene)	75.74	Poly(ethylene)	75.74	yes	T2_Spiked_After_Box1_Wz	very small Fibers, could not get a good measurment of them.	no
2021-07-08	Spiked	After	1	1	-	Natural Material - cellulosic	Large	Point and Shoot	13	-	-	-	-	Yes	No	Burlap	80.4	Burlap	80.4	No	T2_Spiked_After_Box1_Wz		-
2021-07-08	Spiked	After	1	1	-	Natural Material - cellulosic	Large	Point and Shoot	14	-	-	-	-	Yes	No	Burlap	78.59	Burlap	78.59	No	T2_Spiked_After_Box1_Wz		-
2021-07-08	Spiked	After	1	1	-	Natural Material - cellulosic	Large	Point and Shoot	15	-	-	-	-	Yes	No	Orange Cotton Lab Coat	71.59	Orange Cotton Lab Coat	71.59	No	T2_Spiked_After_Box1_Wz		-
2021-07-08	Spiked	After	1	1	-	Natural Material - SPT ppt	Large	Point and Shoot	16	-	-	-	-	Yes	No	Unknown PPT	78.73	Unknown PPT	78.73	No	T2_Spiked_After_Box1_Wz		-
2021-07-08	Spiked	After	1	1	-	Natural Material - cellulosic	Large	Point and Shoot	17	-	-	-	-	Yes	No	US paper money (uninked paper)	78.73	US paper money (uninked paper)	78.73	No	T2_Spiked_After_Box1_Wz		-
2021-07-08	Spiked	After	1	1	-	CR	Medium	Point and shoot	18	299.48	241.98	299.48	241.98	Yes	No	CR Sediment project	46.39	CR Sediment project	46.39	No	T2_Spiked_After_Box1_Wz	first match cilicate coating but next two CR	yes
2021-07-08	Spiked	After	1	1	-	PP	Medium	Point and shoot	19	199.83	91.6	199.83	91.6	Yes	No	PP 53-100	94.73	PP 53-100	94.73	No	T2_Spiked_After_Box1_Wz		yes
2021-07-08	Spiked	After	1	1	-	Other	Large	Point and shoot	20	-	-	-	-	Yes	No	polysphoric acid 20% in h20	61.02	polysphoric acid 20% in h20	61.02	No	T2_Spiked_After_Box1_Wz		-
2021-07-08	Spiked	After	1	1	-	Natural Material - SPT ppt	Large	Point and shoot	21	-	-	-	-	Yes	No	unknown ppt 3	67.19	unknown ppt 3	67.19	No	T2_Spiked_After_Box1_Wz		-
2021-07-08	Spiked	After	1	1	-	Natural Material - SPT ppt	Large	Point and shoot	22	-	-	-	-	Yes	No	unknown ppt 1	66.19	unknown ppt 1	66.19	No	T2_Spiked_After_Box1_Wz		-
2021-07-08	Spiked	After	1	1	-	PP	Large	Point and shoot	23	310.4	190.86	310.4	190.86	Yes	No	Polypropylene CoPolymer	92.87	Polypropylene CoPolymer	92.87	No	T2_Spiked_After_Box1_Wz		yes
2021-07-08	Spiked	After	1	1	-	PP	Large	Point and shoot	24	493	217.43	493	217.43	Yes	No	PP sigma 42789.6 c	97.75	PP sigma 42789.6 c	97.75	No	T2_Spiked_After_Box1_Wz		yes
2021-07-08	Spiked	After	1	1	-	PVC	Large	Point and shoot	25	449.16	241.06	449.16	241.06	Yes	No	PVC 100-300 3	99.27	PVC 100-300 3	99.27	No	T2_Spiked_After_Box1_Wz		no
2021-07-08	Spiked	After	1	1	-	Nylon	Medium	Point and shoot	26	202.31	68.76	202.31	68.76	Yes	No	Nylon	87.83	Nylon	87.83	No	T2_Spiked_After_Box1_Wz		no
2021-07-08	Spiked	After	1	1	-	Nylon	Large	Point and shoot	27	467.41	271.04	467.41	271.04	Yes	No	Nylon NE Rope b	88.34	Nylon NE Rope b	88.34	No	T2_Spiked_After_Box1_Wz	same particle as box 1 pt. 339 (wizard)	no
2021-07-08	Spiked	After	1	1	-	PP	Medium	Point and shoot	28	186.01	117.73	186.01	117.73	Yes	No	PP 53-100 3	96.73	PP 53-100 3	96.73	No	T2_Spiked_After_Box1_Wz		yes
2021-07-08	Spiked	After	1	1	-	HDPE	Medium	Point and shoot	29	229.73	137.52	229.73	137.52	Yes	No	PE GF powder e	94.25	PE GF powder e	94.25	No	T2_Spiked_After_Box1_Wz		yes
2021-07-08	Spiked	After	1	1	-	Nylon	Medium	Point and shoot	30	298.63	146	298.63	146	Yes	No	NYLON6300PLUS7	82.14	NYLON6300PLUS7	82.14	No	T2_Spiked_After_Box1_Wz		yes
2021-07-08	Spiked	After	1	1	-	Nylon	Medium	Point and shoot	32	298.63	146	467.17	316.12	Yes	No	NYLON6300PLUS7	95	NYLON6300PLUS7	95	yes	T2_Spiked_After_Box1_Wz	same as box 1 pt. 32	yes
2021-07-08	Spiked	After	1	1	-	PVC	Large	Point and shoot	33	467.17	316.12	274.8	207.26	Yes	No	PVC300PLUS9	72.2	PVC300PLUS9	72.2	yes	T2_Spiked_After_Box1_Wz	attached to large CR piece (wizard pt 66); top match bad CA spectra "@CA PinkButton a"? but the rest were PVC	yes
2021-07-08	Spiked	After	1	1	-	PS	Medium	Point and shoot	34	274.8	207.26	231.89	153.61	Yes	No	PS 100-300 5	97.62	PS 100-300 5	97.62	yes	T2_Spiked_After_Box1_Wz		yes
2021-07-08	Spiked	After	1	1	-	PVC	Medium	Point and shoot	35	231.89	153.61	335.67	234.05	Yes	No	PVC 100-300 5	97.5	PVC 100-300 5	97.5	yes	T2_Spiked_After_Box1_Wz	same as box 1 pt.36	yes
2021-07-08	Spiked	After	1	1	-	PVC	Large	Point and Shoot	36	335.67	234.05	371.7	182.59	Yes	No	PVC 53-100	92.95	PVC 53-100	92.95	yes	T2_Spiked_After_Box1_Wz	same as box 1 pt. 35	no
2021-07-08	Spiked	After	1	1	-	Other	Large	Point and Shoot	37	-	-	-	-	Yes	No	Stearic Acid	72.97	Stearic Acid	72.97	No	T2_Spiked_After_Box1_Wz		-
2021-07-08	Spiked	After	1	1	-	Unidentified	Medium	Wizard	1	47.2	36.1	47.2	36.1	No	No	Unidentified	0	Unidentified	0	No	T2_Spiked_After_Box1_Wz		-
2021-07-08	Spiked	After	1	1	-	CR	Medium	Wizard	2	57.5	30.7	57.5	30.7	No	No	CR300Plus_11	89.16	CR300Plus_11	89.16	No	T2_Spiked_After_Box1_Wz	Looks like it is a small fragment which broke off of point #168 in box 1	yes
2021-07-08	Spiked	After	1	1	-	Natural Material - SPT ppt	Medium	Wizard	3	53.5	19.1	53.5	19.1	No	No	Uknown ppt 1	78.25	Uknown ppt 1	78.25	No	T2_Spiked_After_Box1_Wz		-
2021-07-08	Spiked	After	1	1	-	Natural Material - SPT ppt	Medium	Wizard	4	53.5	26.6	53.5	26.6	No	No	Uknown ppt 1	79.8	Uknown ppt 1	79.8	No	T2_Spiked_After_Box1_Wz		-
2021-07-08	Spiked	After	1	1	-	Natural Material - SPT ppt	Medium	Wizard	5	73.5	28.6	73.5	28.6	No	No	Uknown ppt 1	86.82	Uknown ppt 1	86.82	No	T2_Spiked_After_Box1_Wz		-
2021-07-08	Spiked	After	1	1	-	Unidentified	Medium	Wizard	6	72.3	37	72.3	37	No	No	Unidentified	0	Unidentified	0	No	T2_Spiked_After_Box1_Wz		-
2021-07-08	Spiked	After	1	1	-	Natural Material - SPT ppt	Medium	Wizard	7	46.8	31.6	46.8	31.6	No	No	Uknown ppt 1	79.65	Uknown ppt 1	79.65	No	T2_Spiked_After_Box1_Wz		-
2021-07-08	Spiked	After	1	1	-	Unidentified	Medium	Wizard	8	66.8	14.5	66.8	14.5	No	No	Unidentified	0	Unidentified	0	No	T2_Spiked_After_Box1_Wz		-
2021-07-08	Spiked	After	1	1	-	Unidentified	Medium	Wizard	9	120.5	73.6	120.5	73.6	Yes	No	Unidentified	0	Unidentified	0	No	T2_Spiked_After_Box1_Wz		-
2021-07-08	Spiked	After	1	1	-	Natural Material - Crumb Rubber Changed	Medium	Wizard	10	93.5	28.6	93.5	28.6	No	No	CR300Plus_7	77.69	CR300Plus_7	77.69	No	T2_Spiked_After_Box1_Wz	reran with the area map and it is nothing, just background. no defined piece	No
2021-07-08	Spiked	After	1	1	-	Unidentified	Medium	Wizard	11	104.6	45.7	104.6	45.7	Yes	No	Unidentified	0	Unidentified	0	No	T2_Spiked_After_Box1_Wz		-
2021-07-08	Spiked	After	1	1	-	Natural Material - SPT ppt	Medium	Wizard	12	238.8	62.6	238.8	62.6	Yes	No	Uknown ppt 1	75.17	Uknown ppt 1	75.17	No	T2_Spiked_After_Box1_Wz		-
2021-07-08	Spiked	After	1	1	-	Natural Material - SPT ppt	Medium	Wizard	13	46.8	29.2	46.8	29.2	No	No	unknown ppt 1	78.5	unknown ppt 1	78.5	No	T2_Spiked_After_Box1_Wz		-
2021-07-08	Spiked	After	1	1	-	Natural Material - SPT ppt	Medium	Wizard	14	46.8	24.3	46.8	24.3	No	No	unknown ppt 1	84.34	unknown ppt 1	84.34	No	T2_Spiked_After_Box1_Wz		-
2021-07-08	Spiked	After	1	1	-	Natural Material - Crumb Rubber Changed	Medium	Wizard	15	60.1	26.5	60.1	26.5	No	No	CR300PLUS_7	75.49	CR300PLUS_7	75.49	No	T2_Spiked_After_Box1_Wz	reran with the area map and it is nothing, just background. no defined piece	No
2021-07-08	Spiked	After	1	1	-	Unidentified	Medium	Wizard	16	63	21.6	63	21.6	No	No	Unidentified	0	Unidentified	0	No	T2_Spiked_After_Box1_Wz		-
2021-07-08	Spiked	After	1	1	-	Unidentified	Medium	Wizard	17	46.8	25.5	46.8	25.5	No	No	Unidentified	0	Unidentified	0	No	T2_Spiked_After_Box1_Wz		-
2021-07-08	Spiked	After	1	1	-	Natural Material - SPT ppt	Large	Wizard	18	514.5	203.7	514.5	203.7	Yes	No	unknown ppt 1	75	unknown ppt 1	75	No	T2_Spiked_After_Box1_Wz		-
2021-07-08	Spiked	After	1	1	-	Unidentified	Medium	Wizard	19	193.8	64.5	193.8	64.5	Yes	No	Unidentified	0	Unidentified	0	No	T2_Spiked_After_Box1_Wz		-
2021-07-08	Spiked	After	1	1	-	Unidentified	Medium	Wizard	20	86.9	52.4	86.9	52.4	No	No	Unidentified	0	Unidentified	0	No	T2_Spiked_After_Box1_Wz		-
2021-07-08	Spiked	After	1	1	-	Natural Material - SPT ppt	Medium	Wizard	21	48.2	28.3	48.2	28.3	No	No	unknown ppt 1	77.5	unknown ppt 1	77.5	No	T2_Spiked_After_Box1_Wz		-
2021-07-08	Spiked	After	1	1	-	Unidentified	Medium	Wizard	22	147	23.6	147	23.6	Yes	No	Unidentified	0	Unidentified	0	No	T2_Spiked_After_Box1_Wz		-
2021-07-08	Spiked	After	1	1	-	Unidentified	Large	Wizard	23	546.8	170.4	546.8	170.4	Yes	No	Unidentified	0	Unidentified	0	No	T2_Spiked_After_Box1_Wz		-
2021-07-08	Spiked	After	1	1	-	Unidentified	Large	Wizard	24	335.6	57.8	335.6	57.8	Yes	No	unknown ppt 1	76.72	unknown ppt 1	76.72	No	T2_Spiked_After_Box1_Wz		-
2021-07-08	Spiked	After	1	1	-	Unidentified	Medium	Wizard	25	53.5	29.8	53.5	29.8	No	No	unknown ppt 1	82.72	unknown ppt 1	82.72	No	T2_Spiked_After_Box1_Wz		-
2021-07-08	Spiked	After	1	1	-	Natural Material - Crumb Rubber Changed	Medium	Wizard	26	106.9	40.4	106.9	40.4	Yes	No	CR300PLUS_7	75.87	CR300PLUS_7	75.87	No	T2_Spiked_After_Box1_Wz	reran with the area map and it is nothing, just background. no defined piece	No
2021-07-08	Spiked	After	1	1	-	Natural Material - SPT ppt	Medium	Wizard	27	80.7	35.2	80.7	35.2	No	No	unknown ppt 1	82.6	unknown ppt 1	82.6	No	T2_Spiked_After_Box1_Wz		-
2021-07-08	Spiked	After	1	1	-	Natural Material - SPT ppt	Medium	Wizard	28	101.8	69.3	101.8	69.3	Yes	No	unknown ppt 1	84.87	unknown ppt 1	84.87	No	T2_Spiked_After_Box1_Wz		-
2021-07-08	Spiked	After	1	1	-	Unidentified	Large	Wizard	29	466.5	191.4	466.5	191.4	Yes	No	Unidentified	0	Unidentified	0	No	T2_Spiked_After_Box1_Wz		-
2021-07-08	Spiked	After	1	1	-	Natural Material - SPT ppt	Medium	Wizard	30	46.8	14.6	46.8	14.6	No	No	unknown ppt 1	80.17	unknown ppt 1	80.17	No	T2_Spiked_After_Box1_Wz		-
2021-07-08	Spiked	After	1	1	-	Natural Material - SPT ppt	Medium	Wizard	31	73.5	37.9	73.5	37.9	No	No	unknown ppt 1	84.67	unknown ppt 1	84.67	No	T2_Spiked_After_Box1_Wz		-
2021-07-08	Spiked	After	1	1	-	Natural Material - SPT ppt	Medium	Wizard	32	46.8	30.4	46.8	30.4	No	No	unknown ppt 1	84.34	unknown ppt 1	84.34	No	T2_Spiked_After_Box1_Wz		-
2021-07-08	Spiked	After	1	1	-	Natural Material - SPT ppt	Medium	Wizard	33	66.8	42.5	66.8	42.5	No	No	unknown ppt 1	78.76	unknown ppt 1	78.76	No	T2_Spiked_After_Box1_Wz		-
2021-07-08	Spiked	After	1	1	-	Unidentified	Medium	Wizard	34	100.2	47.1	100.2	47.1	Yes	No	Unidentified	0	Unidentified	0	No	T2_Spiked_After_Box1_Wz		-
2021-07-08	Spiked	After	1	1	-	Natural Material - SPT ppt	Medium	Wizard	35	189.2	71.8	189.2	71.8	Yes	No	unknown ppt 1	81.96	unknown ppt 1	81.96	No	T2_Spiked_After_Box1_Wz		-
2021-07-08	Spiked	After	1	1	-	Unidentified	Medium	Wizard	36	53.5	11.7	53.5	11.7	No	No	Unidentified	0	Unidentified	0	No	T2_Spiked_After_Box1_Wz		-
2021-07-08	Spiked	After	1	1	-	Unidentified	Medium	Wizard	37	48.2	27.1	48.2	27.1	No	No	Unidentified	0	Unidentified	0	No	T2_Spiked_After_Box1_Wz		-
2021-07-08	Spiked	After	1	1	-	Unidentified	Medium	Wizard	38	61.6	29.5	61.6	29.5	No	No	Unidentified	0	Unidentified	0	No	T2_Spiked_After_Box1_Wz		-
2021-07-08	Spiked	After	1	1	-	Unidentified	Medium	Wizard	39	140.3	42.9	140.3	42.9	Yes	No	Unidentified	0	Unidentified	0	No	T2_Spiked_After_Box1_Wz		-
2021-07-08	Spiked	After	1	1	-	Natural Material - SPT ppt	Medium	Wizard	40	53.9	21.1	53.9	21.1	No	No	unknown ppt 1	81.83	unknown ppt 1	81.83	No	T2_Spiked_After_Box1_Wz		-
2021-07-08	Spiked	After	1	1	-	Natural Material - SPT ppt	Medium	Wizard	41	284.9	60.9	284.9	60.9	Yes	No	unknown ppt 1	81.14	unknown ppt 1	81.14	No	T2_Spiked_After_Box1_Wz		-
2021-07-08	Spiked	After	1	1	-	Natural Material - SPT ppt	Large	Wizard	42	431.1	111.4	431.1	111.4	Yes	No	unknown ppt 1	77.75	unknown ppt 1	77.75	No	T2_Spiked_After_Box1_Wz		-
2021-07-08	Spiked	After	1	1	-	Natural Material - SPT ppt	Medium	Wizard	43	80.2	36.9	80.2	36.9	No	No	unknown ppt 1	81.73	unknown ppt 1	81.73	No	T2_Spiked_After_Box1_Wz		-
2021-07-08	Spiked	After	1	1	-	Natural Material - SPT ppt	Medium	Wizard	44	73.5	32.5	73.5	32.5	No	No	unknown ppt 1	75.2	unknown ppt 1	75.2	No	T2_Spiked_After_Box1_Wz		-
2021-07-08	Spiked	After	1	1	-	Unidentified	Medium	Wizard	45	46.8	36.5	46.8	36.5	No	No	Unidentified	0	Unidentified	0	No	T2_Spiked_After_Box1_Wz		-
2021-07-08	Spiked	After	1	1	-	Natural Material - SPT ppt	Medium	Wizard	46	113.6	52.5	113.6	52.5	Yes	No	unknown ppt 1	75.46	unknown ppt 1	75.46	No	T2_Spiked_After_Box1_Wz		-
2021-07-08	Spiked	After	1	1	-	Unidentified	Medium	Wizard	47	48.2	37.8	48.2	37.8	No	No	Unidentified	0	Unidentified	0	No	T2_Spiked_After_Box1_Wz		-
2021-07-08	Spiked	After	1	1	-	Natural Material - SPT ppt	Medium	Wizard	48	53.5	27.6	53.5	27.6	No	No	unknown ppt 1	85.26	unknown ppt 1	85.26	No	T2_Spiked_After_Box1_Wz		-
2021-07-08	Spiked	After	1	1	-	Natural Material - SPT ppt	Medium	Wizard	49	143.9	60	143.9	60	Yes	No	unknown ppt 1	82.7	unknown ppt 1	82.7	No	T2_Spiked_After_Box1_Wz		-
2021-07-08	Spiked	After	1	1	-	Unidentified	Medium	Wizard	50	68.8	38	68.8	38	No	No	Unidentified	0	Unidentified	0	No	T2_Spiked_After_Box1_Wz		-
2021-07-08	Spiked	After	1	1	-	Natural Material - SPT ppt	Medium	Wizard	51	187.1	41.6	187.1	41.6	Yes	No	unknown ppt 1	83.49	unknown ppt 1	83.49	No	T2_Spiked_After_Box1_Wz		-
2021-07-08	Spiked	After	1	1	-	Natural Material - SPT ppt	Medium	Wizard	52	245.7	78.2	245.7	78.2	Yes	No	unknown ppt 1	88.34	unknown ppt 1	88.34	No	T2_Spiked_After_Box1_Wz		-
2021-07-08	Spiked	After	1	1	-	CR	Large	Wizard	53	2572.9	1262.1	2572.9	1262.1	Yes	No	CR300PLUS_6	95	CR300PLUS_6	95	No	T2_Spiked_After_Box1_Wz	same as box 4 # 425 keeping this one deleting the other	yes
2021-07-08	Spiked	After	1	1	-	Natural Material - SPT ppt	Medium	Wizard	54	114.2	66.7	114.2	66.7	Yes	No	unknown ppt 1	83.36	unknown ppt 1	83.36	No	T2_Spiked_After_Box1_Wz		-
2021-07-08	Spiked	After	1	1	-	PS	Large	Wizard	55	550.4	172.3	550.4	172.3	Yes	No	PS 100 - 300 4	95.05	PS 100 - 300 4	95.05	No	T2_Spiked_After_Box1_Wz		yes
2021-07-08	Spiked	After	1	1	-	Nylon	Large	Wizard	56	405.9	251	405.9	251	Yes	No	NYLON6300PLUS_7	96.95	NYLON6300PLUS_7	96.95	No	T2_Spiked_After_Box1_Wz	pretty nice spectra, probably nylon	yes
2021-07-08	Spiked	After	1	1	-	Natural Material - SPT ppt	Medium	Wizard	57	46.8	32.8	46.8	32.8	No	No	unknown ppt 1	83.77	unknown ppt 1	83.77	No	T2_Spiked_After_Box1_Wz		-
2021-07-08	Spiked	After	1	1	-	HDPE	Large	Wizard	58	565.3	240.3	565.3	240.3	Yes	No	Hunan Xinhai HDPE green braided knotless net	96.62	Hunan Xinhai HDPE green braided knotless net	96.62	No	T2_Spiked_After_Box1_Wz		yes
2021-07-08	Spiked	After	1	1	-	Natural Material - SPT ppt	Medium	Wizard	59	101.8	60.9	101.8	60.9	Yes	No	unknown ppt 1	89.13	unknown ppt 1	89.13	No	T2_Spiked_After_Box1_Wz		-
2021-07-08	Spiked	After	1	1	-	PP	Large	Wizard	60	614.7	201.3	614.7	201.3	Yes	No	PP_sigma_42789.6_d	98.19	PP_sigma_42789.6_d	98.19	No	T2_Spiked_After_Box1_Wz	same as box 4 point and shoot #6	yes
2021-07-08	Spiked	After	1	1	-	Natural Material - SPT ppt	Medium	Wizard	61	53.5	27.6	53.5	27.6	No	No	unknown ppt 1	79.83	unknown ppt 1	79.83	No	T2_Spiked_After_Box1_Wz		-
2021-07-08	Spiked	After	1	1	-	Unidentified	Medium	Wizard	62	46.8	31.6	46.8	31.6	No	No	Unidentified	0	Unidentified	0	No	T2_Spiked_After_Box1_Wz		-
2021-07-08	Spiked	After	1	1	-	Natural Material - Crumb Rubber Changed	Medium	Wizard	63	46.8	24.3	46.8	24.3	No	No	CR300PLUS_7	75.91	CR300PLUS_7	75.91	No	T2_Spiked_After_Box1_Wz	reran with the area map and it is nothing, just background. no defined piece	No
2021-07-08	Spiked	After	1	1	-	Unidentified	Medium	Wizard	64	173.7	101.8	173.7	101.8	Yes	No	Unidentified	0	Unidentified	0	No	T2_Spiked_After_Box1_Wz		-
2021-07-08	Spiked	After	1	1	-	Natural Material - SPT ppt	Large	Wizard	65	387.5	41.7	387.5	41.7	Yes	No	unknown ppt 1	90.52	unknown ppt 1	90.52	No	T2_Spiked_After_Box1_Wz		-
2021-07-08	Spiked	After	1	1	-	CR	Large	Wizard	66	1835.2	1003.1	1835.2	1003.1	Yes	No	EVA_GF_gran_b	94.17	Crumb Rubber 300 Plus 2	54.25	No	T2_Spiked_After_Box1_Wz	needed to use the kramers krong correction and re-ran with ATR point and shoot for id. same as box 4 # 425 keeping this one deleting the other.	yes
2021-07-08	Spiked	After	1	1	-	Natural Material - SPT ppt	Medium	Wizard	67	60.1	19.9	60.1	19.9	No	No	unknown ppt 1	81.32	unknown ppt 1	81.32	No	T2_Spiked_After_Box1_Wz		-
2021-07-08	Spiked	After	1	1	-	Natural Material - SPT ppt	Medium	Wizard	68	173.7	51.4	173.7	51.4	Yes	No	unknown ppt 1	92.16	unknown ppt 1	92.16	No	T2_Spiked_After_Box1_Wz		-
2021-07-08	Spiked	After	1	1	-	Natural Material - Crumb Rubber Changed	Medium	Wizard	69	53.9	45.4	53.9	45.4	No	No	CR300PLUS_11	87.16	CR300PLUS_11	87.16	No	T2_Spiked_After_Box1_Wz	reran with the area map and it is nothing, just background. no defined piece	No
2021-07-08	Spiked	After	1	1	-	Natural Material - SPT ppt	Large	Wizard	70	2252.7	393.5	2252.7	393.5	Yes	No	unknown ppt 1	83.78	unknown ppt 1	83.78	No	T2_Spiked_After_Box1_Wz		-
2021-07-08	Spiked	After	1	1	-	Natural Material - SPT ppt	Medium	Wizard	71	53.5	42.5	53.5	42.5	No	No	unknown ppt 1	79.62	unknown ppt 1	79.62	No	T2_Spiked_After_Box1_Wz		-
2021-07-08	Spiked	After	1	1	-	Natural Material - SPT ppt	Medium	Wizard	72	180.4	95.2	180.4	95.2	Yes	No	unknown ppt 1	78.75	unknown ppt 1	78.75	No	T2_Spiked_After_Box1_Wz		-
2021-07-08	Spiked	After	1	1	-	Natural Material - SPT ppt	Medium	Wizard	73	106.9	33	106.9	33	Yes	No	unknown ppt 1	76.87	unknown ppt 1	76.87	No	T2_Spiked_After_Box1_Wz		-
2021-07-08	Spiked	After	1	1	-	PS	Medium	Wizard	74	248.7	119.8	248.7	119.8	Yes	No	PS_GFPOWDER_SS2_2	95.17	PS_GFPOWDER_SS2_2	95.17	No	T2_Spiked_After_Box1_Wz		yes
2021-07-08	Spiked	After	1	1	-	Natural Material - SPT ppt	Medium	Wizard	75	81.6	50.9	81.6	50.9	No	No	unknown ppt 1	83.5	unknown ppt 1	83.5	No	T2_Spiked_After_Box1_Wz		-
2021-07-08	Spiked	After	1	1	-	PS	Large	Wizard	76	1426.8	584.3	852	774	Yes	No	PS 100-300 2	94.06	PS 100-300 2	94.06	yes	T2_Spiked_After_Box1_Wz		yes
2021-07-08	Spiked	After	1	1	-	Natural Material - SPT ppt	Medium	Wizard	77	93.5	36.5	93.5	36.5	No	No	unknown ppt 1	86.7	unknown ppt 1	86.7	No	T2_Spiked_After_Box1_Wz		-
2021-07-08	Spiked	After	1	1	-	Natural Material - SPT ppt	Medium	Wizard	78	96.4	89.1	96.4	89.1	No	No	unknown ppt 1	78.01	unknown ppt 1	78.01	No	T2_Spiked_After_Box1_Wz		-
2021-07-08	Spiked	After	1	1	-	Unidentified	Medium	Wizard	79	86.9	25.5	86.9	25.5	No	No	Unidentified	0	Unidentified	0	No	T2_Spiked_After_Box1_Wz		-
2021-07-08	Spiked	After	1	1	-	Natural Material - SPT ppt	Medium	Wizard	80	77.9	48.1	77.9	48.1	No	No	unknown ppt 1	80.06	unknown ppt 1	80.06	No	T2_Spiked_After_Box1_Wz		-
2021-07-08	Spiked	After	1	1	-	Natural Material - SPT ppt	Medium	Wizard	81	167	49.7	167	49.7	Yes	No	unknown ppt 1	81.57	unknown ppt 1	81.57	No	T2_Spiked_After_Box1_Wz		-
2021-07-08	Spiked	After	1	1	-	Unidentified	Medium	Wizard	82	83.7	36	83.7	36	No	No	Unidentified	0	Unidentified	0	No	T2_Spiked_After_Box1_Wz		-
2021-07-08	Spiked	After	1	1	-	Natural Material - SPT ppt	Medium	Wizard	83	141	91.1	141	91.1	Yes	No	unknown ppt 1	82.34	unknown ppt 1	82.34	No	T2_Spiked_After_Box1_Wz		-
2021-07-08	Spiked	After	1	1	-	Natural Material - SPT ppt	Medium	Wizard	84	93.5	24.9	93.5	24.9	No	No	unknown ppt 1	84.1	unknown ppt 1	84.1	No	T2_Spiked_After_Box1_Wz		-
2021-07-08	Spiked	After	1	1	-	Unidentified	Medium	Wizard	85	253.9	57.3	253.9	57.3	Yes	No	Unidentified	0	Unidentified	0	No	T2_Spiked_After_Box1_Wz		-
2021-07-08	Spiked	After	1	1	-	Natural Material - SPT ppt	Medium	Wizard	86	147.9	73.4	147.9	73.4	Yes	No	unknown ppt 1	80.53	unknown ppt 1	80.53	No	T2_Spiked_After_Box1_Wz		-
2021-07-08	Spiked	After	1	1	-	Natural Material - SPT ppt	Medium	Wizard	87	100.2	44.2	100.2	44.2	Yes	No	unknown ppt 1	85.25	unknown ppt 1	85.25	No	T2_Spiked_After_Box1_Wz		-
2021-07-08	Spiked	After	1	1	-	Natural Material - SPT ppt	Medium	Wizard	88	60.1	34	60.1	34	No	No	unknown ppt 1	87.24	unknown ppt 1	87.24	No	T2_Spiked_After_Box1_Wz		-
2021-07-08	Spiked	After	1	1	-	Natural Material - SPT ppt	Medium	Wizard	89	120.3	56.7	120.3	56.7	Yes	No	unknown ppt 1	88.7	unknown ppt 1	88.7	No	T2_Spiked_After_Box1_Wz		-
2021-07-08	Spiked	After	1	1	-	Unidentified	Medium	Wizard	90	152.7	68.5	152.7	68.5	Yes	No	Unidentified	0	Unidentified	0	No	T2_Spiked_After_Box1_Wz		-
2021-07-08	Spiked	After	1	1	-	HDPE	Large	Wizard	91	431	197.5	431	197.5	Yes	No	PE_GF_POWDER_SS1_3	96.04	PE_GF_POWDER_SS1_3	96.04	No	T2_Spiked_After_Box1_Wz		yes
2021-07-08	Spiked	After	1	1	-	Natural Material - SPT ppt	Medium	Wizard	92	248	112.5	248	112.5	Yes	No	unknown ppt 1	80.86	unknown ppt 1	80.86	No	T2_Spiked_After_Box1_Wz		-
2021-07-08	Spiked	After	1	1	-	Natural Material - SPT ppt	Large	Wizard	93	490.1	88.3	490.1	88.3	Yes	No	unknown ppt 1	85.66	unknown ppt 1	85.66	No	T2_Spiked_After_Box1_Wz		-
2021-07-08	Spiked	After	1	1	-	Natural Material - SPT ppt	Medium	Wizard	94	176.4	79.6	176.4	79.6	Yes	No	unknown ppt 1	78.77	unknown ppt 1	78.77	No	T2_Spiked_After_Box1_Wz		-
2021-07-08	Spiked	After	1	1	-	Unidentified	Medium	Wizard	95	60.1	51	60.1	51	No	No	Unidentified	0	Unidentified	0	No	T2_Spiked_After_Box1_Wz		-
2021-07-08	Spiked	After	1	1	-	Natural Material - SPT ppt	Medium	Wizard	96	106.9	65.4	106.9	65.4	Yes	No	unknown ppt 1	81.87	unknown ppt 1	81.87	No	T2_Spiked_After_Box1_Wz		-
2021-07-08	Spiked	After	1	1	-	Natural Material - SPT ppt	Large	Wizard	97	324.4	110.6	324.4	110.6	Yes	No	unknown ppt 1	75.59	unknown ppt 1	75.59	No	T2_Spiked_After_Box1_Wz		-
2021-07-08	Spiked	After	1	1	-	Natural Material - SPT ppt	Medium	Wizard	98	66.8	23	66.8	23	No	No	unknown ppt 1	76.11	unknown ppt 1	76.11	No	T2_Spiked_After_Box1_Wz		-
2021-07-08	Spiked	After	1	1	-	Unidentified	Medium	Wizard	99	63	40.6	63	40.6	No	No	Unidentified	0	Unidentified	0	No	T2_Spiked_After_Box1_Wz		-
2021-07-08	Spiked	After	1	1	-	Natural Material - SPT ppt	Medium	Wizard	100	161.6	65.1	161.6	65.1	Yes	No	unknown ppt 1	76.61	unknown ppt 1	76.61	No	T2_Spiked_After_Box1_Wz		-
2021-07-08	Spiked	After	1	1	-	Natural Material - SPT ppt	Medium	Wizard	101	73.5	24	73.5	24	No	No	unknown ppt 1	85.97	unknown ppt 1	85.97	No	T2_Spiked_After_Box1_Wz		-
2021-07-08	Spiked	After	1	1	-	Unidentified	Medium	Wizard	102	207.6	73.4	207.6	73.4	Yes	No	Unidentified	0	Unidentified	0	No	T2_Spiked_After_Box1_Wz		-
2021-07-08	Spiked	After	1	1	-	Natural Material - SPT ppt	Medium	Wizard	103	135.3	73.9	135.3	73.9	Yes	No	unknown ppt 1	75.79	unknown ppt 1	75.79	No	T2_Spiked_After_Box1_Wz		-
2021-07-08	Spiked	After	1	1	-	Natural Material - SPT ppt	Medium	Wizard	104	80.2	24.1	80.2	24.1	No	No	unknown ppt 1	78.13	unknown ppt 1	78.13	No	T2_Spiked_After_Box1_Wz		-
2021-07-08	Spiked	After	1	1	-	Unidentified	Medium	Wizard	105	233.9	54.9	233.9	54.9	Yes	No	Unidentified	0	Unidentified	0	No	T2_Spiked_After_Box1_Wz		-
2021-07-08	Spiked	After	1	1	-	Natural Material - SPT ppt	Medium	Wizard	106	106.9	36.2	106.9	36.2	Yes	No	unknown ppt 1	77.93	unknown ppt 1	77.93	No	T2_Spiked_After_Box1_Wz		-
2021-07-08	Spiked	After	1	1	-	Unidentified	Medium	Wizard	107	120.3	66.2	120.3	66.2	Yes	No	Unidentified	0	Unidentified	0	No	T2_Spiked_After_Box1_Wz		-
2021-07-08	Spiked	After	1	1	-	Unidentified	Large	Wizard	108	322.5	112.6	322.5	112.6	Yes	No	Unidentified	0	Unidentified	0	No	T2_Spiked_After_Box1_Wz		-
2021-07-08	Spiked	After	1	1	-	Natural Material - SPT ppt	Medium	Wizard	109	140.3	69.7	140.3	69.7	Yes	No	unknown ppt 1	79.82	unknown ppt 1	79.82	No	T2_Spiked_After_Box1_Wz		-
2021-07-08	Spiked	After	1	1	-	Natural Material - SPT ppt	Medium	Wizard	110	147	36	147	36	Yes	No	unknown ppt 1	87.37	unknown ppt 1	87.37	No	T2_Spiked_After_Box1_Wz		-
2021-07-08	Spiked	After	1	1	-	Natural Material - SPT ppt	Medium	Wizard	111	120.3	31.2	120.3	31.2	Yes	No	unknown ppt 1	85.71	unknown ppt 1	85.71	No	T2_Spiked_After_Box1_Wz		-
2021-07-08	Spiked	After	1	1	-	Unidentified	Medium	Wizard	112	46.8	25.5	46.8	25.5	No	No	Unidentified	0	Unidentified	0	No	T2_Spiked_After_Box1_Wz		-
2021-07-08	Spiked	After	1	1	-	Natural Material - SPT ppt	Medium	Wizard	113	160.6	80	160.6	80	Yes	No	unknown ppt 1	81.53	unknown ppt 1	81.53	No	T2_Spiked_After_Box1_Wz		-
2021-07-08	Spiked	After	1	1	-	Natural Material - SPT ppt	Medium	Wizard	114	133.6	63	133.6	63	Yes	No	unknown ppt 1	88.22	unknown ppt 1	88.22	No	T2_Spiked_After_Box1_Wz		-
2021-07-08	Spiked	After	1	1	-	Natural Material - SPT ppt	Medium	Wizard	115	101.8	25.1	101.8	25.1	Yes	No	unknown ppt 1	84.64	unknown ppt 1	84.64	No	T2_Spiked_After_Box1_Wz		-
2021-07-08	Spiked	After	1	1	-	Unidentified	Medium	Wizard	116	119.5	46.1	119.5	46.1	Yes	No	Unidentified	0	Unidentified	0	No	T2_Spiked_After_Box1_Wz		-
2021-07-08	Spiked	After	1	1	-	Natural Material - SPT ppt	Medium	Wizard	117	60.1	37.8	60.1	37.8	No	No	unknown ppt 1	75.19	unknown ppt 1	75.19	No	T2_Spiked_After_Box1_Wz		-
2021-07-08	Spiked	After	1	1	-	Natural Material - SPT ppt	Medium	Wizard	118	176.4	60.6	176.4	60.6	Yes	No	unknown ppt 1	81.98	unknown ppt 1	81.98	No	T2_Spiked_After_Box1_Wz		-
2021-07-08	Spiked	After	1	1	-	PS	Large	Wizard	119	327.7	216.3	327.7	216.3	Yes	No	PS 100-300 2	95.81	PS 100-300 2	95.81	No	T2_Spiked_After_Box1_Wz		yes
2021-07-08	Spiked	After	1	1	-	Unidentified	Medium	Wizard	120	113.6	49	113.6	49	Yes	No	Unidentified	0	Unidentified	0	No	T2_Spiked_After_Box1_Wz		-
2021-07-08	Spiked	After	1	1	-	Natural Material - SPT ppt	Large	Wizard	121	300.7	123.5	300.7	123.5	Yes	No	unknown ppt 1	83.15	unknown ppt 1	83.15	No	T2_Spiked_After_Box1_Wz		-
2021-07-08	Spiked	After	1	1	-	Natural Material - SPT ppt	Medium	Wizard	122	133.6	72.3	133.6	72.3	Yes	No	unknown ppt 1	78.43	unknown ppt 1	78.43	No	T2_Spiked_After_Box1_Wz		-
2021-07-08	Spiked	After	1	1	-	Natural Material - SPT ppt	Medium	Wizard	123	267.3	114.9	267.3	114.9	Yes	No	unknown ppt 1	88.59	unknown ppt 1	88.59	No	T2_Spiked_After_Box1_Wz		-
2021-07-08	Spiked	After	1	1	-	Natural Material - SPT ppt	Medium	Wizard	124	53.5	37.2	53.5	37.2	No	No	unknown ppt 1	77.59	unknown ppt 1	77.59	No	T2_Spiked_After_Box1_Wz		-
2021-07-08	Spiked	After	1	1	-	Unidentified	Medium	Wizard	125	86.9	34.7	86.9	34.7	No	No	Unidentified	0	Unidentified	0	No	T2_Spiked_After_Box1_Wz		-
2021-07-08	Spiked	After	1	1	-	Natural Material - SPT ppt	Medium	Wizard	126	60.1	18	60.1	18	No	No	unknown ppt 1	75.13	unknown ppt 1	75.13	No	T2_Spiked_After_Box1_Wz		-
2021-07-08	Spiked	After	1	1	-	Unidentified	Medium	Wizard	127	127	37.2	127	37.2	Yes	No	Unidentified	0	Unidentified	0	No	T2_Spiked_After_Box1_Wz		-
2021-07-08	Spiked	After	1	1	-	Natural Material - SPT ppt	Medium	Wizard	128	100.2	52.2	100.2	52.2	Yes	No	unknown ppt 1	76.71	unknown ppt 1	76.71	No	T2_Spiked_After_Box1_Wz		-
2021-07-08	Spiked	After	1	1	-	Natural Material - SPT ppt	Medium	Wizard	129	170.4	76.4	170.4	76.4	Yes	No	unknown ppt 1	85.46	unknown ppt 1	85.46	No	T2_Spiked_After_Box1_Wz		-
2021-07-08	Spiked	After	1	1	-	Natural Material - SPT ppt	Medium	Wizard	130	247.2	95.4	247.2	95.4	Yes	No	unknown ppt 1	83.65	unknown ppt 1	83.65	No	T2_Spiked_After_Box1_Wz		-
2021-07-08	Spiked	After	1	1	-	Natural Material - SPT ppt	Medium	Wizard	131	73.5	52.6	73.5	52.6	No	No	unknown ppt 1	76.67	unknown ppt 1	76.67	No	T2_Spiked_After_Box1_Wz		-
2021-07-08	Spiked	After	1	1	-	Natural Material - SPT ppt	Large	Wizard	132	360.8	79.1	360.8	79.1	Yes	No	unknown ppt 1	81.16	unknown ppt 1	81.16	No	T2_Spiked_After_Box1_Wz		-
2021-07-08	Spiked	After	1	1	-	Unidentified	Medium	Wizard	133	73.5	50.3	73.5	50.3	No	No	Unidentified	0	Unidentified	0	No	T2_Spiked_After_Box1_Wz		-
2021-07-08	Spiked	After	1	1	-	Natural Material - SPT ppt	Medium	Wizard	134	46.8	31.6	46.8	31.6	No	No	unknown ppt 1	84.76	unknown ppt 1	84.76	No	T2_Spiked_After_Box1_Wz		-
2021-07-08	Spiked	After	1	1	-	Natural Material - SPT ppt	Medium	Wizard	135	80.2	33.3	80.2	33.3	No	No	unknown ppt 1	75.29	unknown ppt 1	75.29	No	T2_Spiked_After_Box1_Wz		-
2021-07-08	Spiked	After	1	1	-	Natural Material - SPT ppt	Medium	Wizard	136	53.5	21.3	53.5	21.3	No	No	unknown ppt 1	79.58	unknown ppt 1	79.58	No	T2_Spiked_After_Box1_Wz		-
2021-07-08	Spiked	After	1	1	-	Natural Material - SPT ppt	Medium	Wizard	137	46.8	31.6	46.8	31.6	No	No	unknown ppt 1	87.56	unknown ppt 1	87.56	No	T2_Spiked_After_Box1_Wz		-
2021-07-08	Spiked	After	1	1	-	Natural Material - SPT ppt	Medium	Wizard	138	53.9	42.2	53.9	42.2	No	No	unknown ppt 1	82.69	unknown ppt 1	82.69	No	T2_Spiked_After_Box1_Wz		-
2021-07-08	Spiked	After	1	1	-	Natural Material - SPT ppt	Medium	Wizard	139	66.8	34.9	66.8	34.9	No	No	unknown ppt 1	82.03	unknown ppt 1	82.03	No	T2_Spiked_After_Box1_Wz		-
2021-07-08	Spiked	After	1	1	-	Natural Material - SPT ppt	Medium	Wizard	140	133.6	43.4	133.6	43.4	Yes	No	unknown ppt 1	84.97	unknown ppt 1	84.97	No	T2_Spiked_After_Box1_Wz		-
2021-07-08	Spiked	After	1	1	-	Natural Material - SPT ppt	Medium	Wizard	141	135.3	62.6	135.3	62.6	Yes	No	unknown ppt 1	80.04	unknown ppt 1	80.04	No	T2_Spiked_After_Box1_Wz		-
2021-07-08	Spiked	After	1	1	-	Natural Material - SPT ppt	Medium	Wizard	142	147	52.6	147	52.6	Yes	No	unknown ppt 1	84.84	unknown ppt 1	84.84	No	T2_Spiked_After_Box1_Wz		-
2021-07-08	Spiked	After	1	1	-	Natural Material - SPT ppt	Medium	Wizard	143	66.8	40.8	66.8	40.8	No	No	unknown ppt 1	78.85	unknown ppt 1	78.85	No	T2_Spiked_After_Box1_Wz		-
2021-07-08	Spiked	After	1	1	-	Natural Material - SPT ppt	Medium	Wizard	144	272.1	72.5	272.1	72.5	Yes	No	unknown ppt 1	78.49	unknown ppt 1	78.49	No	T2_Spiked_After_Box1_Wz		-
2021-07-08	Spiked	After	1	1	-	Unidentified	Medium	Wizard	145	140.3	53.5	140.3	53.5	Yes	No	Unidentified	0	Unidentified	0	No	T2_Spiked_After_Box1_Wz		-
2021-07-08	Spiked	After	1	1	-	Natural Material - SPT ppt	Medium	Wizard	146	129	44.9	129	44.9	Yes	No	unknown ppt 1	83.47	unknown ppt 1	83.47	No	T2_Spiked_After_Box1_Wz		-
2021-07-08	Spiked	After	1	1	-	Natural Material - SPT ppt	Medium	Wizard	147	142.1	63.2	142.1	63.2	Yes	No	unknown ppt 1	76.66	unknown ppt 1	76.66	No	T2_Spiked_After_Box1_Wz		-
2021-07-08	Spiked	After	1	1	-	Natural Material - SPT ppt	Medium	Wizard	148	53.5	29.8	53.5	29.8	No	No	unknown ppt 1	81.37	unknown ppt 1	81.37	No	T2_Spiked_After_Box1_Wz		-
2021-07-08	Spiked	After	1	1	-	Natural Material - SPT ppt	Medium	Wizard	149	46.8	21.9	46.8	21.9	No	No	unknown ppt 1	79.04	unknown ppt 1	79.04	No	T2_Spiked_After_Box1_Wz		-
2021-07-08	Spiked	After	1	1	-	Natural Material - SPT ppt	Medium	Wizard	150	46.8	19.4	46.8	19.4	No	No	unknown ppt 1	77.09	unknown ppt 1	77.09	No	T2_Spiked_After_Box1_Wz		-
2021-07-08	Spiked	After	1	1	-	Natural Material - SPT ppt	Medium	Wizard	151	60.1	42.5	60.1	42.5	No	No	unknown ppt 1	83.83	unknown ppt 1	83.83	No	T2_Spiked_After_Box1_Wz		-
2021-07-08	Spiked	After	1	1	-	Natural Material - SPT ppt	Medium	Wizard	152	73.5	52.6	73.5	52.6	No	No	unknown ppt 1	78.39	unknown ppt 1	78.39	No	T2_Spiked_After_Box1_Wz		-
2021-07-08	Spiked	After	1	1	-	Natural Material - SPT ppt	Medium	Wizard	153	116.7	60.9	116.7	60.9	Yes	No	unknown ppt 1	76.03	unknown ppt 1	76.03	No	T2_Spiked_After_Box1_Wz		-
2021-07-08	Spiked	After	1	1	-	Natural Material - SPT ppt	Medium	Wizard	154	147	64.2	147	64.2	Yes	No	unknown ppt 1	80.55	unknown ppt 1	80.55	No	T2_Spiked_After_Box1_Wz		-
2021-07-08	Spiked	After	1	1	-	Natural Material - Crumb Rubber Changed	Medium	Wizard	155	46.8	26.7	46.8	26.7	No	No	CR300PLUS_7	77.09	CR300PLUS_7	77.09	No	T2_Spiked_After_Box1_Wz	no black particle under point, may just be carbon based natural material	no
2021-07-08	Spiked	After	1	1	-	CR	Medium	Wizard	156	46.8	26.7	46.8	26.7	No	No	CR300PLUS_7	76.73	CR300PLUS_7	76.73	No	T2_Spiked_After_Box1_Wz	cluster of very small black particles/dust maybe from the crumb rubber breaking apart; looks left over from large particle 158, should count if couting all CR sizes.	yes
2021-07-08	Spiked	After	1	1	-	Unidentified	Medium	Wizard	157	73.5	29.4	73.5	29.4	No	No	Unidentified	0	Unidentified	0	No	T2_Spiked_After_Box1_Wz		-
2021-07-08	Spiked	After	1	1	-	CR	Large	Wizard	158	4239.5	1032.2	1430	1250	Yes	No	CR300PLUS_6	98.61	CR300PLUS_6	98.61	yes	T2_Spiked_After_Box1_Wz		yes
2021-07-08	Spiked	After	1	1	-	Natural Material - SPT ppt	Medium	Wizard	159	193.8	90.6	193.8	90.6	Yes	No	unknown ppt 1	86.96	unknown ppt 1	86.96	No	T2_Spiked_After_Box1_Wz		-
2021-07-08	Spiked	After	1	1	-	Natural Material - SPT ppt	Medium	Wizard	160	80.5	55.1	80.5	55.1	No	No	unknown ppt 1	79.14	unknown ppt 1	79.14	No	T2_Spiked_After_Box1_Wz		-
2021-07-08	Spiked	After	1	1	-	Unidentified	Medium	Wizard	161	73.5	45.6	73.5	45.6	No	No	Unidentified	0	Unidentified	0	No	T2_Spiked_After_Box1_Wz		-
2021-07-08	Spiked	After	1	1	-	Unidentified	Medium	Wizard	162	66.8	44.2	66.8	44.2	No	No	Unidentified	0	Unidentified	0	No	T2_Spiked_After_Box1_Wz		-
2021-07-08	Spiked	After	1	1	-	Unidentified	Medium	Wizard	163	202	90.3	202	90.3	Yes	No	Unidentified	0	Unidentified	0	No	T2_Spiked_After_Box1_Wz		-
2021-07-08	Spiked	After	1	1	-	Natural Material - Crumb Rubber Changed	Medium	Wizard	164	195.2	78.4	195.2	78.4	Yes	No	CR300PLUS_11	76.71	CR300PLUS_11	76.71	No	T2_Spiked_After_Box1_Wz	weird contrast on filter paper, no particle. do not include in final count	no
2021-07-08	Spiked	After	1	1	-	Unidentified	Medium	Wizard	165	189.2	90.7	189.2	90.7	Yes	No	Unidentified	0	Unidentified	0	No	T2_Spiked_After_Box1_Wz		-
2021-07-08	Spiked	After	1	1	-	Unidentified	Medium	Wizard	166	218.2	99.5	218.2	99.5	Yes	No	Unidentified	0	Unidentified	0	No	T2_Spiked_After_Box1_Wz		-
2021-07-08	Spiked	After	1	1	-	Cotton	Fiber	Wizard	167	338.1	70.1	338.1	70.1	Yes	Yes	OrangeCottonLabCoat2	84.02	OrangeCottonLabCoat2	84.02	No	T2_Spiked_After_Box1_Wz	Fiber, but not orange	-
2021-07-08	Spiked	After	1	1	-	Unidentified	Medium	Wizard	168	66.8	44.2	66.8	44.2	No	No	Unidentified	0	Unidentified	0	No	T2_Spiked_After_Box1_Wz		-
2021-07-08	Spiked	After	1	1	-	Unidentified	Medium	Wizard	169	66.8	52.7	66.8	52.7	No	No	Unidentified	0	Unidentified	0	No	T2_Spiked_After_Box1_Wz		-
2021-07-08	Spiked	After	1	1	-	Natural Material - Crumb Rubber Changed	Medium	Wizard	170	63	28.9	63	28.9	No	No	CR300PLUS_7	78.52	CR300PLUS_7	78.52	No	T2_Spiked_After_Box1_Wz	no black particle under point, may just be carbon based natural material	no
2021-07-08	Spiked	After	1	1	-	Unidentified	Medium	Wizard	171	60.1	45.4	60.1	45.4	No	No	Unidentified	0	Unidentified	0	No	T2_Spiked_After_Box1_Wz		-
2021-07-08	Spiked	After	1	1	-	Natural Material - SPT ppt	Medium	Wizard	172	73.5	31.7	73.5	31.7	No	No	unknown ppt 1	80.73	unknown ppt 1	80.73	No	T2_Spiked_After_Box1_Wz		-
2021-07-08	Spiked	After	1	1	-	Natural Material - SPT ppt	Medium	Wizard	173	48.2	42.5	48.2	42.5	No	No	unknown ppt 1	78.44	unknown ppt 1	78.44	No	T2_Spiked_After_Box1_Wz		-
2021-07-08	Spiked	After	1	1	-	Unidentified	Medium	Wizard	174	135.3	63	135.3	63	Yes	No	Unidentified	0	Unidentified	0	No	T2_Spiked_After_Box1_Wz		-
2021-07-08	Spiked	After	1	1	-	Natural Material - SPT ppt	Medium	Wizard	175	60.1	45.4	60.1	45.4	No	No	unknown ppt 1	84.13	unknown ppt 1	84.13	No	T2_Spiked_After_Box1_Wz		-
2021-07-08	Spiked	After	1	1	-	Natural Material - Crumb Rubber Changed	Medium	Wizard	176	193.8	60.1	193.8	60.1	Yes	No	CR300PLUS_7	78.31	CR300PLUS_7	78.31	No	T2_Spiked_After_Box1_Wz	no black particle under point, may just be carbon based natural material	no
2021-07-08	Spiked	After	1	1	-	Unidentified	Medium	Wizard	177	46.8	30.4	46.8	30.4	No	No	Unidentified	0	Unidentified	0	No	T2_Spiked_After_Box1_Wz		-
2021-07-08	Spiked	After	1	1	-	Natural Material - SPT ppt	Medium	Wizard	178	53.5	39.3	53.5	39.3	No	No	unknown ppt 1	77.14	unknown ppt 1	77.14	No	T2_Spiked_After_Box1_Wz		-
2021-07-08	Spiked	After	1	1	-	Natural Material - SPT ppt	Medium	Wizard	179	148.4	55.2	148.4	55.2	Yes	No	unknown ppt 1	87.16	unknown ppt 1	87.16	No	T2_Spiked_After_Box1_Wz		-
2021-07-08	Spiked	After	1	1	-	Natural Material - SPT ppt	Medium	Wizard	180	133.6	48.5	133.6	48.5	Yes	No	unknown ppt 1	81.33	unknown ppt 1	81.33	No	T2_Spiked_After_Box1_Wz		-
2021-07-08	Spiked	After	1	1	-	Unidentified	Medium	Wizard	181	218.5	66.6	218.5	66.6	Yes	No	Unidentified	0	Unidentified	0	No	T2_Spiked_After_Box1_Wz		-
2021-07-08	Spiked	After	1	1	-	Natural Material - SPT ppt	Medium	Wizard	182	66.8	30.6	66.8	30.6	No	No	unknown ppt 1	87.25	unknown ppt 1	87.25	No	T2_Spiked_After_Box1_Wz		-
2021-07-08	Spiked	After	1	1	-	Unidentified	Medium	Wizard	183	53.5	26.6	53.5	26.6	No	No	Unidentified	0	Unidentified	0	No	T2_Spiked_After_Box1_Wz		-
2021-07-08	Spiked	After	1	1	-	Unidentified	Medium	Wizard	184	46.8	26.7	46.8	26.7	No	No	Unidentified	0	Unidentified	0	No	T2_Spiked_After_Box1_Wz		-
2021-07-08	Spiked	After	1	1	-	Unidentified	Medium	Wizard	185	46.8	15.8	46.8	15.8	No	No	Unidentified	0	Unidentified	0	No	T2_Spiked_After_Box1_Wz		-
2021-07-08	Spiked	After	1	1	-	Unidentified	Medium	Wizard	186	53.5	31.9	53.5	31.9	No	No	Unidentified	0	Unidentified	0	No	T2_Spiked_After_Box1_Wz		-
2021-07-08	Spiked	After	1	1	-	Natural Material - SPT ppt	Medium	Wizard	187	113.6	54	113.6	54	Yes	No	unknown ppt 1	77.68	unknown ppt 1	77.68	No	T2_Spiked_After_Box1_Wz		-
2021-07-08	Spiked	After	1	1	-	Natural Material - Crumb Rubber Changed	Medium	Wizard	188	173.7	31.7	173.7	31.7	Yes	No	CR300PLUS_7	75.49	CR300PLUS_7	75.49	No	T2_Spiked_After_Box1_Wz	no black particle under point, may just be carbon based natural material	no
2021-07-08	Spiked	After	1	1	-	Unidentified	Medium	Wizard	189	93.5	31.6	93.5	31.6	No	No	Unidentified	0	Unidentified	0	No	T2_Spiked_After_Box1_Wz		-
2021-07-08	Spiked	After	1	1	-	Unidentified	Medium	Wizard	190	53.9	50.7	53.9	50.7	No	No	Unidentified	0	Unidentified	0	No	T2_Spiked_After_Box1_Wz		-
2021-07-08	Spiked	After	1	1	-	Natural Material - SPT ppt	Large	Wizard	191	387.4	166.6	387.4	166.6	Yes	No	unknown ppt 1	77.18	unknown ppt 1	77.18	No	T2_Spiked_After_Box1_Wz		-
2021-07-08	Spiked	After	1	1	-	Unidentified	Medium	Wizard	192	86.9	39.9	86.9	39.9	No	No	Unidentified	0	Unidentified	0	No	T2_Spiked_After_Box1_Wz		-
2021-07-08	Spiked	After	1	1	-	Natural Material - Crumb Rubber Changed	Medium	Wizard	193	127	49.7	79.71	21.73	No	No	CR300PLUS_7	75.29	CR300PLUS_7	75.29	yes	T2_Spiked_After_Box1_Wz	no black particle under point, may just be carbon based natural material	no
2021-07-08	Spiked	After	1	1	-	Unidentified	Medium	Wizard	194	110.6	64.2	110.6	64.2	Yes	No	Unidentified	0	Unidentified	0	No	T2_Spiked_After_Box1_Wz		-
2021-07-08	Spiked	After	1	1	-	Unidentified	Medium	Wizard	195	96.4	46	96.4	46	No	No	Unidentified	0	Unidentified	0	No	T2_Spiked_After_Box1_Wz		-
2021-07-08	Spiked	After	1	1	-	Natural Material - SPT ppt	Medium	Wizard	196	53.5	24.5	53.5	24.5	No	No	unknown ppt 1	79.2	unknown ppt 1	79.2	No	T2_Spiked_After_Box1_Wz		-
2021-07-08	Spiked	After	1	1	-	Unidentified	Medium	Wizard	197	135.3	53.4	135.3	53.4	Yes	No	Unidentified	0	Unidentified	0	No	T2_Spiked_After_Box1_Wz		-
2021-07-08	Spiked	After	1	1	-	Natural Material - SPT ppt	Large	Wizard	198	535	170.4	535	170.4	Yes	No	unknown ppt 1	85.05	unknown ppt 1	85.05	No	T2_Spiked_After_Box1_Wz		-
2021-07-08	Spiked	After	1	1	-	Unidentified	Medium	Wizard	199	68.8	38	68.8	38	No	No	Unidentified	0	Unidentified	0	No	T2_Spiked_After_Box1_Wz		-
2021-07-08	Spiked	After	1	1	-	Natural Material - SPT ppt	Medium	Wizard	200	46.8	32.8	46.8	32.8	No	No	unknown ppt 1	85.65	unknown ppt 1	85.65	No	T2_Spiked_After_Box1_Wz		-
2021-07-08	Spiked	After	1	1	-	Unidentified	Medium	Wizard	201	53.5	22.3	53.5	22.3	No	No	Unidentified	0	Unidentified	0	No	T2_Spiked_After_Box1_Wz		-
2021-07-08	Spiked	After	1	1	-	Unidentified	Medium	Wizard	202	141	60.1	141	60.1	Yes	No	Unidentified	0	Unidentified	0	No	T2_Spiked_After_Box1_Wz		-
2021-07-08	Spiked	After	1	1	-	Natural Material - SPT ppt	Medium	Wizard	203	227.2	119.6	227.2	119.6	Yes	No	unknown ppt 1	76.04	unknown ppt 1	76.04	No	T2_Spiked_After_Box1_Wz		-
2021-07-08	Spiked	After	1	1	-	Natural Material - SPT ppt	Medium	Wizard	204	46.8	37.7	46.8	37.7	No	No	unknown ppt 1	85.08	unknown ppt 1	85.08	No	T2_Spiked_After_Box1_Wz		-
2021-07-08	Spiked	After	1	1	-	Unidentified	Medium	Wizard	205	227.2	35	227.2	35	Yes	No	Unidentified	0	Unidentified	0	No	T2_Spiked_After_Box1_Wz		-
2021-07-08	Spiked	After	1	1	-	Unidentified	Medium	Wizard	206	60.1	50.1	60.1	50.1	No	No	Unidentified	0	Unidentified	0	No	T2_Spiked_After_Box1_Wz		-
2021-07-08	Spiked	After	1	1	-	Natural Material - SPT ppt	Medium	Wizard	207	95	36.5	95	36.5	No	No	unknown ppt 1	81.84	unknown ppt 1	81.84	No	T2_Spiked_After_Box1_Wz		-
2021-07-08	Spiked	After	1	1	-	Natural Material - SPT ppt	Medium	Wizard	208	80.2	37.6	80.2	37.6	No	No	unknown ppt 1	81.76	unknown ppt 1	81.76	No	T2_Spiked_After_Box1_Wz		-
2021-07-08	Spiked	After	1	1	-	Natural Material - SPT ppt	Medium	Wizard	209	53.5	25.5	53.5	25.5	No	No	unknown ppt 1	78.13	unknown ppt 1	78.13	No	T2_Spiked_After_Box1_Wz		-
2021-07-08	Spiked	After	1	1	-	Natural Material - SPT ppt	Medium	Wizard	210	46.8	36.5	46.8	36.5	No	No	unknown ppt 1	76.73	unknown ppt 1	76.73	No	T2_Spiked_After_Box1_Wz		-
2021-07-08	Spiked	After	1	1	-	Unidentified	Medium	Wizard	211	53.5	31.9	53.5	31.9	No	No	Unidentified	0	Unidentified	0	No	T2_Spiked_After_Box1_Wz		-
2021-07-08	Spiked	After	1	1	-	Natural Material - SPT ppt	Medium	Wizard	212	53.9	20	53.9	20	No	No	unknown ppt 1	80.89	unknown ppt 1	80.89	No	T2_Spiked_After_Box1_Wz		-
2021-07-08	Spiked	After	1	1	-	Natural Material - SPT ppt	Medium	Wizard	213	287.6	129.8	287.6	129.8	Yes	No	unknown ppt 1	89.6	unknown ppt 1	89.6	No	T2_Spiked_After_Box1_Wz		-
2021-07-08	Spiked	After	1	1	-	Natural Material - SPT ppt	Medium	Wizard	214	143.9	56.9	143.9	56.9	Yes	No	unknown ppt 1	76.53	unknown ppt 1	76.53	No	T2_Spiked_After_Box1_Wz		-
2021-07-08	Spiked	After	1	1	-	Unidentified	Medium	Wizard	215	179.9	54	179.9	54	Yes	No	Unidentified	0	Unidentified	0	No	T2_Spiked_After_Box1_Wz		-
2021-07-08	Spiked	After	1	1	-	Natural Material - SPT ppt	Medium	Wizard	216	80.2	38.3	80.2	38.3	No	No	unknown ppt 1	86.91	unknown ppt 1	86.91	No	T2_Spiked_After_Box1_Wz		-
2021-07-08	Spiked	After	1	1	-	Natural Material - SPT ppt	Medium	Wizard	217	48.2	43.7	48.2	43.7	No	No	unknown ppt 1	80.23	unknown ppt 1	80.23	No	T2_Spiked_After_Box1_Wz		-
2021-07-08	Spiked	After	1	1	-	Unidentified	Medium	Wizard	218	73.5	34	73.5	34	No	No	Unidentified	0	Unidentified	0	No	T2_Spiked_After_Box1_Wz		-
2021-07-08	Spiked	After	1	1	-	Natural Material - SPT ppt	Medium	Wizard	219	66.8	28.9	66.8	28.9	No	No	unknown ppt 1	76.97	unknown ppt 1	76.97	No	T2_Spiked_After_Box1_Wz		-
2021-07-08	Spiked	After	1	1	-	Natural Material - SPT ppt	Medium	Wizard	220	125.5	41.7	125.5	41.7	Yes	No	unknown ppt 1	84.38	unknown ppt 1	84.38	No	T2_Spiked_After_Box1_Wz		-
2021-07-08	Spiked	After	1	1	-	Natural Material - SPT ppt	Medium	Wizard	221	53.5	38.3	53.5	38.3	No	No	unknown ppt 1	77.88	unknown ppt 1	77.88	No	T2_Spiked_After_Box1_Wz		-
2021-07-08	Spiked	After	1	1	-	Natural Material - SPT ppt	Medium	Wizard	222	253.9	60.7	253.9	60.7	Yes	No	unknown ppt 1	80.01	unknown ppt 1	80.01	No	T2_Spiked_After_Box1_Wz		-
2021-07-08	Spiked	After	1	1	-	Natural Material - SPT ppt	Medium	Wizard	223	46.8	29.2	46.8	29.2	No	No	unknown ppt 1	78.85	unknown ppt 1	78.85	No	T2_Spiked_After_Box1_Wz		-
2021-07-08	Spiked	After	1	1	-	Natural Material - SPT ppt	Medium	Wizard	224	152.5	64.1	152.5	64.1	Yes	No	unknown ppt 1	77.77	unknown ppt 1	77.77	No	T2_Spiked_After_Box1_Wz		-
2021-07-08	Spiked	After	1	1	-	Natural Material - SPT ppt	Medium	Wizard	225	227.2	100.8	227.2	100.8	Yes	No	unknown ppt 1	82.92	unknown ppt 1	82.92	No	T2_Spiked_After_Box1_Wz		-
2021-07-08	Spiked	After	1	1	-	Natural Material - SPT ppt	Medium	Wizard	226	57.5	36.6	57.5	36.6	No	No	unknown ppt 1	83.62	unknown ppt 1	83.62	No	T2_Spiked_After_Box1_Wz		-
2021-07-08	Spiked	After	1	1	-	Natural Material - SPT ppt	Medium	Wizard	227	74.7	40.3	74.7	40.3	No	No	unknown ppt 1	84.32	unknown ppt 1	84.32	No	T2_Spiked_After_Box1_Wz		-
2021-07-08	Spiked	After	1	1	-	Unidentified	Medium	Wizard	228	46.8	25.5	46.8	25.5	No	No	Unidentified	0	Unidentified	0	No	T2_Spiked_After_Box1_Wz		-
2021-07-08	Spiked	After	1	1	-	Natural Material - SPT ppt	Medium	Wizard	229	80.2	44.7	80.2	44.7	No	No	unknown ppt 1	77.15	unknown ppt 1	77.15	No	T2_Spiked_After_Box1_Wz		-
2021-07-08	Spiked	After	1	1	-	Unidentified	Medium	Wizard	230	53.5	30.8	53.5	30.8	No	No	Unidentified	0	Unidentified	0	No	T2_Spiked_After_Box1_Wz		-
2021-07-08	Spiked	After	1	1	-	Natural Material - SPT ppt	Medium	Wizard	231	253.9	69.9	253.9	69.9	Yes	No	unknown ppt 1	81.41	unknown ppt 1	81.41	No	T2_Spiked_After_Box1_Wz		-
2021-07-08	Spiked	After	1	1	-	Natural Material - SPT ppt	Medium	Wizard	232	226.1	87.2	226.1	87.2	Yes	No	unknown ppt 1	76.32	unknown ppt 1	76.32	No	T2_Spiked_After_Box1_Wz		-
2021-07-08	Spiked	After	1	1	-	Natural Material - SPT ppt	Large	Wizard	233	512.2	139	512.2	139	Yes	No	unknown ppt 1	83.23	unknown ppt 1	83.23	No	T2_Spiked_After_Box1_Wz		-
2021-07-08	Spiked	After	1	1	-	Natural Material - SPT ppt	Medium	Wizard	234	158.4	46.7	158.4	46.7	Yes	No	unknown ppt 1	82.05	unknown ppt 1	82.05	No	T2_Spiked_After_Box1_Wz		-
2021-07-08	Spiked	After	1	1	-	Natural Material - SPT ppt	Medium	Wizard	235	127	61.8	127	61.8	Yes	No	unknown ppt 1	76.88	unknown ppt 1	76.88	No	T2_Spiked_After_Box1_Wz		-
2021-07-08	Spiked	After	1	1	-	Natural Material - SPT ppt	Medium	Wizard	236	116.9	26.3	116.9	26.3	Yes	No	unknown ppt 1	86.22	unknown ppt 1	86.22	No	T2_Spiked_After_Box1_Wz		-
2021-07-08	Spiked	After	1	1	-	Natural Material - SPT ppt	Medium	Wizard	237	116.7	56	116.7	56	Yes	No	unknown ppt 1	80.66	unknown ppt 1	80.66	No	T2_Spiked_After_Box1_Wz		-
2021-07-08	Spiked	After	1	1	-	Unidentified	Medium	Wizard	238	113.6	49	113.6	49	Yes	No	Unidentified	0	Unidentified	0	No	T2_Spiked_After_Box1_Wz		-
2021-07-08	Spiked	After	1	1	-	Natural Material - SPT ppt	Medium	Wizard	239	163.1	91.3	163.1	91.3	Yes	No	unknown ppt 1	87.93	unknown ppt 1	87.93	No	T2_Spiked_After_Box1_Wz		-
2021-07-08	Spiked	After	1	1	-	Natural Material - SPT ppt	Medium	Wizard	240	46.8	26.7	46.8	26.7	No	No	unknown ppt 1	82.54	unknown ppt 1	82.54	No	T2_Spiked_After_Box1_Wz		-
2021-07-08	Spiked	After	1	1	-	Natural Material - SPT ppt	Medium	Wizard	241	66.8	56.2	66.8	56.2	No	No	unknown ppt 1	83.28	unknown ppt 1	83.28	No	T2_Spiked_After_Box1_Wz		-
2021-07-08	Spiked	After	1	1	-	Natural Material - SPT ppt	Large	Wizard	242	413.2	76.9	413.2	76.9	Yes	No	unknown ppt 1	79.31	unknown ppt 1	79.31	No	T2_Spiked_After_Box1_Wz		-
2021-07-08	Spiked	After	1	1	-	Natural Material - SPT ppt	Medium	Wizard	243	73.5	20.9	73.5	20.9	No	No	unknown ppt 1	88.8	unknown ppt 1	88.8	No	T2_Spiked_After_Box1_Wz		-
2021-07-08	Spiked	After	1	1	-	Natural Material - SPT ppt	Large	Wizard	244	346.6	140.4	346.6	140.4	Yes	No	unknown ppt 1	88.99	unknown ppt 1	88.99	No	T2_Spiked_After_Box1_Wz		-
2021-07-08	Spiked	After	1	1	-	Unidentified	Medium	Wizard	245	93.5	41.3	93.5	41.3	No	No	Unidentified	0	Unidentified	0	No	T2_Spiked_After_Box1_Wz		-
2021-07-08	Spiked	After	1	1	-	Natural Material - SPT ppt	Medium	Wizard	246	63	45.1	63	45.1	No	No	unknown ppt 1	76.9	unknown ppt 1	76.9	No	T2_Spiked_After_Box1_Wz		-
2021-07-08	Spiked	After	1	1	-	Natural Material - SPT ppt	Medium	Wizard	247	140.5	63.1	140.5	63.1	Yes	No	unknown ppt 1	82.37	unknown ppt 1	82.37	No	T2_Spiked_After_Box1_Wz		-
2021-07-08	Spiked	After	1	1	-	Natural Material - SPT ppt	Medium	Wizard	248	146.7	74.8	146.7	74.8	Yes	No	unknown ppt 1	81.91	unknown ppt 1	81.91	No	T2_Spiked_After_Box1_Wz		-
2021-07-08	Spiked	After	1	1	-	Unidentified	Medium	Wizard	249	48.2	41.3	48.2	41.3	No	No	Unidentified	0	Unidentified	0	No	T2_Spiked_After_Box1_Wz		-
2021-07-08	Spiked	After	1	1	-	Natural Material - SPT ppt	Medium	Wizard	250	127	57.3	127	57.3	Yes	No	unknown ppt 1	81.73	unknown ppt 1	81.73	No	T2_Spiked_After_Box1_Wz		-
2021-07-08	Spiked	After	1	1	-	Natural Material - SPT ppt	Medium	Wizard	251	68.8	45.4	68.8	45.4	No	No	unknown ppt 1	87.78	unknown ppt 1	87.78	No	T2_Spiked_After_Box1_Wz		-
2021-07-08	Spiked	After	1	1	-	CR	Large	Wizard	252	963.7	456.9	963.7	456.9	Yes	No	CR300PLUS_8	86.05	CR300PLUS_8	86.05	No	T2_Spiked_After_Box1_Wz		yes
2021-07-08	Spiked	After	1	1	-	Unidentified	Medium	Wizard	253	133.6	37.4	133.6	37.4	Yes	No	Unidentified	0	Unidentified	0	No	T2_Spiked_After_Box1_Wz		-
2021-07-08	Spiked	After	1	1	-	Natural Material - Crumb Rubber Changed	Medium	Wizard	254	77.9	41.6	77.9	41.6	No	No	CR_sedimentproject*2	77.18	CR_sedimentproject*2	77.18	No	T2_Spiked_After_Box1_Wz	no black particle under point, may just be carbon based natural material	no
2021-07-08	Spiked	After	1	1	-	Natural Material - Crumb Rubber Changed	Medium	Wizard	255	72.3	26.7	72.3	26.7	No	No	CR_sedimentproject*2	81.55	CR_sedimentproject*2	81.55	No	T2_Spiked_After_Box1_Wz	no black particle under point, may just be carbon based natural material	no
2021-07-08	Spiked	After	1	1	-	Unidentified	Medium	Wizard	256	48.2	33	48.2	33	No	No	Unidentified	0	Unidentified	0	No	T2_Spiked_After_Box1_Wz		-
2021-07-08	Spiked	After	1	1	-	Natural Material - SPT ppt	Large	Wizard	257	579.8	177.5	579.8	177.5	Yes	No	unknown ppt 1	86.67	unknown ppt 1	86.67	No	T2_Spiked_After_Box1_Wz		-
2021-07-08	Spiked	After	1	1	-	Natural Material - SPT ppt	Medium	Wizard	258	46.8	34	46.8	34	No	No	unknown ppt 1	91.02	unknown ppt 1	91.02	No	T2_Spiked_After_Box1_Wz		-
2021-07-08	Spiked	After	1	1	-	Natural Material - SPT ppt	Medium	Wizard	259	279.8	142.2	279.8	142.2	Yes	No	unknown ppt 1	86.22	unknown ppt 1	86.22	No	T2_Spiked_After_Box1_Wz		-
2021-07-08	Spiked	After	1	1	-	Natural Material - SPT ppt	Medium	Wizard	260	153.7	42.5	153.7	42.5	Yes	No	unknown ppt 1	88.26	unknown ppt 1	88.26	No	T2_Spiked_After_Box1_Wz		-
2021-07-08	Spiked	After	1	1	-	Natural Material - SPT ppt	Medium	Wizard	261	220.5	80.7	220.5	80.7	Yes	No	unknown ppt 1	80.51	unknown ppt 1	80.51	No	T2_Spiked_After_Box1_Wz		-
2021-07-08	Spiked	After	1	1	-	Unidentified	Medium	Wizard	262	192.4	37.2	192.4	37.2	Yes	No	Unidentified	0	Unidentified	0	No	T2_Spiked_After_Box1_Wz		-
2021-07-08	Spiked	After	1	1	-	Unidentified	Medium	Wizard	263	127	62.2	127	62.2	Yes	No	Unidentified	0	Unidentified	0	No	T2_Spiked_After_Box1_Wz		-
2021-07-08	Spiked	After	1	1	-	Unidentified	Medium	Wizard	264	46.8	24.3	46.8	24.3	No	No	Unidentified	0	Unidentified	0	No	T2_Spiked_After_Box1_Wz		-
2021-07-08	Spiked	After	1	1	-	Natural Material - SPT ppt	Medium	Wizard	265	53.5	33	53.5	33	No	No	unknown ppt 1	78.13	unknown ppt 1	78.13	No	T2_Spiked_After_Box1_Wz		-
2021-07-08	Spiked	After	1	1	-	Unidentified	Medium	Wizard	266	80.2	72.3	80.2	72.3	No	No	Unidentified	0	Unidentified	0	No	T2_Spiked_After_Box1_Wz		-
2021-07-08	Spiked	After	1	1	-	Unidentified	Medium	Wizard	267	60.1	32.1	60.1	32.1	No	No	Unidentified	0	Unidentified	0	No	T2_Spiked_After_Box1_Wz		-
2021-07-08	Spiked	After	1	1	-	Natural Material - SPT ppt	Medium	Wizard	268	113.6	66.1	113.6	66.1	Yes	No	unknown ppt 1	84.67	unknown ppt 1	84.67	No	T2_Spiked_After_Box1_Wz		-
2021-07-08	Spiked	After	1	1	-	HDPE	Large	Wizard	269	502.3	147.6	502.3	147.6	Yes	No	LLDPE_Biohaz_b	86.15	LLDPE_Biohaz_b	86.15	No	T2_Spiked_After_Box1_Wz		yes
2021-07-08	Spiked	After	1	1	-	Natural Material - SPT ppt	Medium	Wizard	270	159.4	45.7	159.4	45.7	Yes	No	unknown ppt 1	83.67	unknown ppt 1	83.67	No	T2_Spiked_After_Box1_Wz		-
2021-07-08	Spiked	After	1	1	-	Natural Material - SPT ppt	Medium	Wizard	271	140.3	72.9	140.3	72.9	Yes	No	unknown ppt 1	85.75	unknown ppt 1	85.75	No	T2_Spiked_After_Box1_Wz		-
2021-07-08	Spiked	After	1	1	-	Natural Material - SPT ppt	Medium	Wizard	272	63	34.3	63	34.3	No	No	unknown ppt 1	78.31	unknown ppt 1	78.31	No	T2_Spiked_After_Box1_Wz		-
2021-07-08	Spiked	After	1	1	-	Natural Material - SPT ppt	Medium	Wizard	273	196.5	125.8	196.5	125.8	Yes	No	unknown ppt 1	86.69	unknown ppt 1	86.69	No	T2_Spiked_After_Box1_Wz		-
2021-07-08	Spiked	After	1	1	-	Natural Material - SPT ppt	Medium	Wizard	274	140.3	61.6	140.3	61.6	Yes	No	unknown ppt 1	81.25	unknown ppt 1	81.25	No	T2_Spiked_After_Box1_Wz		-
2021-07-08	Spiked	After	1	1	-	Unidentified	Medium	Wizard	275	107.9	36.9	107.9	36.9	Yes	No	Unidentified	0	Unidentified	0	No	T2_Spiked_After_Box1_Wz		-
2021-07-08	Spiked	After	1	1	-	Natural Material - SPT ppt	Large	Wizard	276	360.8	95.6	360.8	95.6	Yes	No	unknown ppt 1	78.78	unknown ppt 1	78.78	No	T2_Spiked_After_Box1_Wz		-
2021-07-08	Spiked	After	1	1	-	Natural Material - SPT ppt	Medium	Wizard	277	119.5	45.2	119.5	45.2	Yes	No	unknown ppt 1	81.53	unknown ppt 1	81.53	No	T2_Spiked_After_Box1_Wz		-
2021-07-08	Spiked	After	1	1	-	Natural Material - SPT ppt	Medium	Wizard	278	122.8	56.9	122.8	56.9	Yes	No	unknown ppt 1	85.46	unknown ppt 1	85.46	No	T2_Spiked_After_Box1_Wz		-
2021-07-08	Spiked	After	1	1	-	Unidentified	Medium	Wizard	279	66.8	38.3	66.8	38.3	No	No	Unidentified	0	Unidentified	0	No	T2_Spiked_After_Box1_Wz		-
2021-07-08	Spiked	After	1	1	-	Unidentified	Medium	Wizard	280	73.5	31.7	73.5	31.7	No	No	Unidentified	0	Unidentified	0	No	T2_Spiked_After_Box1_Wz		-
2021-07-08	Spiked	After	1	1	-	Natural Material - SPT ppt	Medium	Wizard	281	73.5	45.6	73.5	45.6	No	No	unknown ppt 1	77.52	unknown ppt 1	77.52	No	T2_Spiked_After_Box1_Wz		-
2021-07-08	Spiked	After	1	1	-	PP	Large	Wizard	282	2594.9	716.6	1098	631	Yes	No	PP300PLUS_3	97.59	PP300PLUS_3	97.59	yes	T2_Spiked_After_Box1_Wz		yes
2021-07-08	Spiked	After	1	1	-	Natural Material - SPT ppt	Medium	Wizard	283	140.3	86.3	140.3	86.3	Yes	No	unknown ppt 1	78.21	unknown ppt 1	78.21	No	T2_Spiked_After_Box1_Wz		-
2021-07-08	Spiked	After	1	1	-	Unidentified	Medium	Wizard	284	89.6	60.9	89.6	60.9	No	No	Unidentified	0	Unidentified	0	No	T2_Spiked_After_Box1_Wz		-
2021-07-08	Spiked	After	1	1	-	Natural Material - SPT ppt	Medium	Wizard	285	86.9	60.2	86.9	60.2	No	No	unknown ppt 1	90.25	unknown ppt 1	90.25	No	T2_Spiked_After_Box1_Wz		-
2021-07-08	Spiked	After	1	1	-	Natural Material - SPT ppt	Medium	Wizard	286	46.8	34	46.8	34	No	No	unknown ppt 1	84.78	unknown ppt 1	84.78	No	T2_Spiked_After_Box1_Wz		-
2021-07-08	Spiked	After	1	1	-	Unidentified	Medium	Wizard	287	86.9	47.1	86.9	47.1	No	No	Unidentified	0	Unidentified	0	No	T2_Spiked_After_Box1_Wz		-
2021-07-08	Spiked	After	1	1	-	Natural Material - SPT ppt	Medium	Wizard	288	53.5	34	53.5	34	No	No	unknown ppt 1	78.6	unknown ppt 1	78.6	No	T2_Spiked_After_Box1_Wz		-
2021-07-08	Spiked	After	1	1	-	Natural Material - SPT ppt	Medium	Wizard	289	86.9	68.1	86.9	68.1	No	No	unknown ppt 1	83.33	unknown ppt 1	83.33	No	T2_Spiked_After_Box1_Wz		-
2021-07-08	Spiked	After	1	1	-	Natural Material - SPT ppt	Medium	Wizard	290	71	51.2	71	51.2	No	No	unknown ppt 1	81.92	unknown ppt 1	81.92	No	T2_Spiked_After_Box1_Wz		-
2021-07-08	Spiked	After	1	1	-	Natural Material - SPT ppt	Medium	Wizard	291	80.2	50.3	80.2	50.3	No	No	unknown ppt 1	84.43	unknown ppt 1	84.43	No	T2_Spiked_After_Box1_Wz		-
2021-07-08	Spiked	After	1	1	-	Unidentified	Medium	Wizard	292	86.9	28.1	86.9	28.1	No	No	Unidentified	0	Unidentified	0	No	T2_Spiked_After_Box1_Wz		-
2021-07-08	Spiked	After	1	1	-	Unidentified	Medium	Wizard	293	73.5	61.1	73.5	61.1	No	No	Unidentified	0	Unidentified	0	No	T2_Spiked_After_Box1_Wz		-
2021-07-08	Spiked	After	1	1	-	Unidentified	Medium	Wizard	294	135.3	58.4	135.3	58.4	Yes	No	Unidentified	0	Unidentified	0	No	T2_Spiked_After_Box1_Wz		-
2021-07-08	Spiked	After	1	1	-	Unidentified	Medium	Wizard	295	110.6	55	110.6	55	Yes	No	Unidentified	0	Unidentified	0	No	T2_Spiked_After_Box1_Wz		-
2021-07-08	Spiked	After	1	1	-	Natural Material - SPT ppt	Medium	Wizard	296	147	48	147	48	Yes	No	unknown ppt 1	76.5	unknown ppt 1	76.5	No	T2_Spiked_After_Box1_Wz		-
2021-07-08	Spiked	After	1	1	-	Unidentified	Medium	Wizard	297	60.1	25.5	60.1	25.5	No	No	Unidentified	0	Unidentified	0	No	T2_Spiked_After_Box1_Wz		-
2021-07-08	Spiked	After	1	1	-	Natural Material - SPT ppt	Medium	Wizard	298	60.1	17	60.1	17	No	No	unknown ppt 1	76.82	unknown ppt 1	76.82	No	T2_Spiked_After_Box1_Wz		-
2021-07-08	Spiked	After	1	1	-	Unidentified	Medium	Wizard	299	60.1	33.1	60.1	33.1	No	No	Unidentified	0	Unidentified	0	No	T2_Spiked_After_Box1_Wz		-
2021-07-08	Spiked	After	1	1	-	Unidentified	Medium	Wizard	300	120.3	47.7	120.3	47.7	Yes	No	Unidentified	0	Unidentified	0	No	T2_Spiked_After_Box1_Wz		-
2021-07-08	Spiked	After	1	1	-	Unidentified	Medium	Wizard	301	66.8	32.3	66.8	32.3	No	No	Unidentified	0	Unidentified	0	No	T2_Spiked_After_Box1_Wz		-
2021-07-08	Spiked	After	1	1	-	Unidentified	Medium	Wizard	302	137.7	90.8	137.7	90.8	Yes	No	Unidentified	0	Unidentified	0	No	T2_Spiked_After_Box1_Wz		-
2021-07-08	Spiked	After	1	1	-	Unidentified	Medium	Wizard	303	180.4	52.9	180.4	52.9	Yes	No	Unidentified	0	Unidentified	0	No	T2_Spiked_After_Box1_Wz		-
2021-07-08	Spiked	After	1	1	-	Natural Material - SPT ppt	Medium	Wizard	304	122.8	75.4	122.8	75.4	Yes	No	unknown ppt 1	84.42	unknown ppt 1	84.42	No	T2_Spiked_After_Box1_Wz		-
2021-07-08	Spiked	After	1	1	-	Natural Material - SPT ppt	Medium	Wizard	305	133.6	38.3	133.6	38.3	Yes	No	unknown ppt 1	78.36	unknown ppt 1	78.36	No	T2_Spiked_After_Box1_Wz		-
2021-07-08	Spiked	After	1	1	-	Unidentified	Medium	Wizard	306	46.8	35.2	46.8	35.2	No	No	Unidentified	0	Unidentified	0	No	T2_Spiked_After_Box1_Wz		-
2021-07-08	Spiked	After	1	1	-	Natural Material - SPT ppt	Medium	Wizard	307	86.9	39.9	86.9	39.9	No	No	unknown ppt 1	79.26	unknown ppt 1	79.26	No	T2_Spiked_After_Box1_Wz		-
2021-07-08	Spiked	After	1	1	-	Natural Material - SPT ppt	Medium	Wizard	308	227.2	47.3	227.2	47.3	Yes	No	unknown ppt 1	83.14	unknown ppt 1	83.14	No	T2_Spiked_After_Box1_Wz		-
2021-07-08	Spiked	After	1	1	-	Natural Material - SPT ppt	Medium	Wizard	309	113.6	50	113.6	50	Yes	No	unknown ppt 1	86.21	unknown ppt 1	86.21	No	T2_Spiked_After_Box1_Wz		-
2021-07-08	Spiked	After	1	1	-	Unidentified	Medium	Wizard	310	66.8	34	66.8	34	No	No	Unidentified	0	Unidentified	0	No	T2_Spiked_After_Box1_Wz		-
2021-07-08	Spiked	After	1	1	-	Natural Material - SPT ppt	Medium	Wizard	311	276.2	62.2	276.2	62.2	Yes	No	unknown ppt 1	83.26	unknown ppt 1	83.26	No	T2_Spiked_After_Box1_Wz		-
2021-07-08	Spiked	After	1	1	-	Natural Material - SPT ppt	Medium	Wizard	312	220.5	42.3	220.5	42.3	Yes	No	unknown ppt 1	75.18	unknown ppt 1	75.18	No	T2_Spiked_After_Box1_Wz		-
2021-07-08	Spiked	After	1	1	-	Natural Material - SPT ppt	Medium	Wizard	313	192.4	69.1	192.4	69.1	Yes	No	unknown ppt 1	78.44	unknown ppt 1	78.44	No	T2_Spiked_After_Box1_Wz		-
2021-07-08	Spiked	After	1	1	-	Unidentified	Medium	Wizard	314	53.5	39.3	53.5	39.3	No	No	Unidentified	0	Unidentified	0	No	T2_Spiked_After_Box1_Wz		-
2021-07-08	Spiked	After	1	1	-	Natural Material - SPT ppt	Large	Wizard	315	427.6	151.7	427.6	151.7	Yes	No	unknown ppt 1	83.34	unknown ppt 1	83.34	No	T2_Spiked_After_Box1_Wz		-
2021-07-08	Spiked	After	1	1	-	Natural Material - SPT ppt	Large	Wizard	316	444.2	98.3	444.2	98.3	Yes	No	unknown ppt 1	80.36	unknown ppt 1	80.36	No	T2_Spiked_After_Box1_Wz		-
2021-07-08	Spiked	After	1	1	-	Natural Material - SPT ppt	Medium	Wizard	317	46.8	18.2	46.8	18.2	No	No	unknown ppt 1	85.61	unknown ppt 1	85.61	No	T2_Spiked_After_Box1_Wz		-
2021-07-08	Spiked	After	1	1	-	Natural Material - SPT ppt	Large	Wizard	318	348.8	78.1	348.8	78.1	Yes	No	unknown ppt 1	83.33	unknown ppt 1	83.33	No	T2_Spiked_After_Box1_Wz		-
2021-07-08	Spiked	After	1	1	-	Natural Material - SPT ppt	Medium	Wizard	319	86.9	26.2	86.9	26.2	No	No	unknown ppt 1	86.31	unknown ppt 1	86.31	No	T2_Spiked_After_Box1_Wz		-
2021-07-08	Spiked	After	1	1	-	Natural Material - SPT ppt	Large	Wizard	320	397.6	60.3	397.6	60.3	Yes	No	unknown ppt 1	83.52	unknown ppt 1	83.52	No	T2_Spiked_After_Box1_Wz		-
2021-07-08	Spiked	After	1	1	-	Natural Material - SPT ppt	Medium	Wizard	321	80.2	41.1	80.2	41.1	No	No	unknown ppt 1	77.96	unknown ppt 1	77.96	No	T2_Spiked_After_Box1_Wz		-
2021-07-08	Spiked	After	1	1	-	Unidentified	Medium	Wizard	322	68.8	41.3	68.8	41.3	No	No	Unidentified	0	Unidentified	0	No	T2_Spiked_After_Box1_Wz		-
2021-07-08	Spiked	After	1	1	-	Unidentified	Medium	Wizard	323	46.8	32.8	46.8	32.8	No	No	Unidentified	0	Unidentified	0	No	T2_Spiked_After_Box1_Wz		-
2021-07-08	Spiked	After	1	1	-	Natural Material - SPT ppt	Medium	Wizard	324	48.2	27.1	48.2	27.1	No	No	unknown ppt 1	88.64	unknown ppt 1	88.64	No	T2_Spiked_After_Box1_Wz		-
2021-07-08	Spiked	After	1	1	-	Natural Material - SPT ppt	Medium	Wizard	325	106.9	29.2	106.9	29.2	Yes	No	unknown ppt 1	75.26	unknown ppt 1	75.26	No	T2_Spiked_After_Box1_Wz		-
2021-07-08	Spiked	After	1	1	-	Natural Material - SPT ppt	Medium	Wizard	326	146.7	42.6	146.7	42.6	Yes	No	unknown ppt 1	78.37	unknown ppt 1	78.37	No	T2_Spiked_After_Box1_Wz		-
2021-07-08	Spiked	After	1	1	-	Natural Material - SPT ppt	Medium	Wizard	327	100.2	38.6	100.2	38.6	Yes	No	unknown ppt 1	81.75	unknown ppt 1	81.75	No	T2_Spiked_After_Box1_Wz		-
2021-07-08	Spiked	After	1	1	-	Natural Material - SPT ppt	Medium	Wizard	328	53.5	25.5	53.5	25.5	No	No	unknown ppt 1	85.56	unknown ppt 1	85.56	No	T2_Spiked_After_Box1_Wz		-
2021-07-08	Spiked	After	1	1	-	Natural Material - SPT ppt	Medium	Wizard	329	46.8	43.8	46.8	43.8	No	No	unknown ppt 1	75.01	unknown ppt 1	75.01	No	T2_Spiked_After_Box1_Wz		-
2021-07-08	Spiked	After	1	1	-	Natural Material - SPT ppt	Medium	Wizard	330	133.6	65.1	133.6	65.1	Yes	No	unknown ppt 1	81.67	unknown ppt 1	81.67	No	T2_Spiked_After_Box1_Wz		-
2021-07-08	Spiked	After	1	1	-	Natural Material - SPT ppt	Medium	Wizard	331	46.8	21.9	46.8	21.9	No	No	unknown ppt 1	82.16	unknown ppt 1	82.16	No	T2_Spiked_After_Box1_Wz		-
2021-07-08	Spiked	After	1	1	-	Unidentified	Medium	Wizard	332	153.7	42.5	153.7	42.5	Yes	No	Unidentified	0	Unidentified	0	No	T2_Spiked_After_Box1_Wz		-
2021-07-08	Spiked	After	1	1	-	Unidentified	Medium	Wizard	333	160.4	37.2	160.4	37.2	Yes	No	Unidentified	0	Unidentified	0	No	T2_Spiked_After_Box1_Wz		-
2021-07-08	Spiked	After	1	1	-	Natural Material - SPT ppt	Medium	Wizard	334	193.8	56.9	193.8	56.9	Yes	No	unknown ppt 1	82.8	unknown ppt 1	82.8	No	T2_Spiked_After_Box1_Wz		-
2021-07-08	Spiked	After	1	1	-	Unidentified	Medium	Wizard	335	93.5	68.7	93.5	68.7	No	No	Unidentified	0	Unidentified	0	No	T2_Spiked_After_Box1_Wz		-
2021-07-08	Spiked	After	1	1	-	Natural Material - SPT ppt	Medium	Wizard	336	104.4	43	104.4	43	Yes	No	unknown ppt 1	80.29	unknown ppt 1	80.29	No	T2_Spiked_After_Box1_Wz		-
2021-07-08	Spiked	After	1	1	-	Natural Material - SPT ppt	Medium	Wizard	337	80.7	52.1	80.7	52.1	No	No	unknown ppt 1	82.78	unknown ppt 1	82.78	No	T2_Spiked_After_Box1_Wz		-
2021-07-08	Spiked	After	1	1	-	Natural Material - SPT ppt	Medium	Wizard	338	133.6	46.8	133.6	46.8	Yes	No	unknown ppt 1	80.8	unknown ppt 1	80.8	No	T2_Spiked_After_Box1_Wz		-
2021-07-08	Spiked	After	1	1	-	Nylon	Large	Wizard	339	2651.7	465.3	534	282	Yes	No	NYLON 100-300 5	98.41	NYLON 100-300 5	98.41	yes	T2_Spiked_After_Box1_Wz		yes
2021-07-08	Spiked	After	1	1	-	Unidentified	Medium	Wizard	340	115	59.3	115	59.3	Yes	No	Unidentified	0	Unidentified	0	No	T2_Spiked_After_Box1_Wz		-
2021-07-08	Spiked	After	1	1	-	Unidentified	Medium	Wizard	341	196.5	64.8	196.5	64.8	Yes	No	Unidentified	0	Unidentified	0	No	T2_Spiked_After_Box1_Wz		-
2021-07-08	Spiked	After	1	1	-	Natural Material - SPT ppt	Medium	Wizard	342	46.8	26.7	46.8	26.7	No	No	unknown ppt 1	88.14	unknown ppt 1	88.14	No	T2_Spiked_After_Box1_Wz		-
2021-07-08	Spiked	After	1	1	-	Natural Material - SPT ppt	Medium	Wizard	343	93.5	60.8	93.5	60.8	No	No	unknown ppt 1	83.65	unknown ppt 1	83.65	No	T2_Spiked_After_Box1_Wz		-
2021-07-08	Spiked	After	1	1	-	Natural Material - SPT ppt	Medium	Wizard	344	172.4	67.9	172.4	67.9	Yes	No	unknown ppt 1	80.97	unknown ppt 1	80.97	No	T2_Spiked_After_Box1_Wz		-
2021-07-08	Spiked	After	1	1	-	Unidentified	Medium	Wizard	345	46.8	28	46.8	28	No	No	Unidentified	0	Unidentified	0	No	T2_Spiked_After_Box1_Wz		-
2021-07-08	Spiked	After	1	1	-	Natural Material - SPT ppt	Medium	Wizard	346	63	50.5	63	50.5	No	No	unknown ppt 1	83.77	unknown ppt 1	83.77	No	T2_Spiked_After_Box1_Wz		-
2021-07-08	Spiked	After	1	1	-	Natural Material - SPT ppt	Medium	Wizard	347	133.6	60.4	133.6	60.4	Yes	No	unknown ppt 1	78.1	unknown ppt 1	78.1	No	T2_Spiked_After_Box1_Wz		-
2021-07-08	Spiked	After	1	1	-	Natural Material - SPT ppt	Medium	Wizard	348	60.1	29.3	60.1	29.3	No	No	unknown ppt 1	82.53	unknown ppt 1	82.53	No	T2_Spiked_After_Box1_Wz		-
2021-07-08	Spiked	After	1	1	-	Unidentified	Medium	Wizard	349	73.5	37.9	73.5	37.9	No	No	Unidentified	0	Unidentified	0	No	T2_Spiked_After_Box1_Wz		-
2021-07-08	Spiked	After	1	1	-	Natural Material - SPT ppt	Large	Wizard	350	580.8	177.4	580.8	177.4	Yes	No	unknown ppt 1	77.96	unknown ppt 1	77.96	No	T2_Spiked_After_Box1_Wz		-
2021-07-08	Spiked	After	1	1	-	Natural Material - SPT ppt	Medium	Wizard	351	46.8	21.9	46.8	21.9	No	No	unknown ppt 1	82.67	unknown ppt 1	82.67	No	T2_Spiked_After_Box1_Wz		-
2021-07-08	Spiked	After	1	1	-	Natural Material - SPT ppt	Medium	Wizard	352	46.8	21.9	46.8	21.9	No	No	unknown ppt 1	87.37	unknown ppt 1	87.37	No	T2_Spiked_After_Box1_Wz		-
2021-07-08	Spiked	After	1	1	-	Unidentified	Medium	Wizard	353	74.7	38.8	74.7	38.8	No	No	Unidentified	0	Unidentified	0	No	T2_Spiked_After_Box1_Wz		-
2021-07-08	Spiked	After	1	1	-	Natural Material - SPT ppt	Medium	Wizard	354	80.2	37.6	80.2	37.6	No	No	unknown ppt 1	79.3	unknown ppt 1	79.3	No	T2_Spiked_After_Box1_Wz		-
2021-07-08	Spiked	After	1	1	-	Unidentified	Medium	Wizard	355	80.2	19.9	80.2	19.9	No	No	Unidentified	0	Unidentified	0	No	T2_Spiked_After_Box1_Wz		-
2021-07-08	Spiked	After	1	1	-	Natural Material - SPT ppt	Medium	Wizard	356	153.8	95.7	153.8	95.7	Yes	No	unknown ppt 1	85.51	unknown ppt 1	85.51	No	T2_Spiked_After_Box1_Wz		-
2021-07-08	Spiked	After	1	1	-	Natural Material - SPT ppt	Medium	Wizard	357	140.3	46.2	140.3	46.2	Yes	No	unknown ppt 1	78.36	unknown ppt 1	78.36	No	T2_Spiked_After_Box1_Wz		-
2021-07-08	Spiked	After	1	1	-	Natural Material - SPT ppt	Medium	Wizard	358	48.2	40.1	48.2	40.1	No	No	unknown ppt 1	85.54	unknown ppt 1	85.54	No	T2_Spiked_After_Box1_Wz		-
2021-07-08	Spiked	After	1	1	-	Natural Material - SPT ppt	Medium	Wizard	359	93.5	79.6	93.5	79.6	No	No	unknown ppt 1	85.8	unknown ppt 1	85.8	No	T2_Spiked_After_Box1_Wz		-
2021-07-08	Spiked	After	1	1	-	Natural Material - SPT ppt	Medium	Wizard	360	127	39.4	127	39.4	Yes	No	unknown ppt 1	75.51	unknown ppt 1	75.51	No	T2_Spiked_After_Box1_Wz		-
2021-07-08	Spiked	After	1	1	-	Natural Material - SPT ppt	Medium	Wizard	361	93.5	46.8	93.5	46.8	No	No	unknown ppt 1	83.45	unknown ppt 1	83.45	No	T2_Spiked_After_Box1_Wz		-
2021-07-08	Spiked	After	1	1	-	Unidentified	Medium	Wizard	362	61.6	48.9	61.6	48.9	No	No	Unidentified	0	Unidentified	0	No	T2_Spiked_After_Box1_Wz		-
2021-07-08	Spiked	After	1	1	-	Natural Material - SPT ppt	Medium	Wizard	363	158.4	87.9	158.4	87.9	Yes	No	unknown ppt 1	89.77	unknown ppt 1	89.77	No	T2_Spiked_After_Box1_Wz		-
2021-07-08	Spiked	After	1	1	-	Natural Material - SPT ppt	Large	Wizard	364	559.8	140.7	559.8	140.7	Yes	No	unknown ppt 1	83.78	unknown ppt 1	83.78	No	T2_Spiked_After_Box1_Wz		-
2021-07-08	Spiked	After	1	1	-	Unidentified	Medium	Wizard	365	46.8	42.5	46.8	42.5	No	No	Unidentified	0	Unidentified	0	No	T2_Spiked_After_Box1_Wz		-
2021-07-08	Spiked	After	1	1	-	Natural Material - SPT ppt	Medium	Wizard	366	87.1	48.9	87.1	48.9	No	No	unknown ppt 1	75.29	unknown ppt 1	75.29	No	T2_Spiked_After_Box1_Wz		-
2021-07-08	Spiked	After	1	1	-	Natural Material - SPT ppt	Medium	Wizard	367	80.2	21.3	80.2	21.3	No	No	unknown ppt 1	78.26	unknown ppt 1	78.26	No	T2_Spiked_After_Box1_Wz		-
2021-07-08	Spiked	After	1	1	-	Natural Material - SPT ppt	Medium	Wizard	368	46.8	36.5	46.8	36.5	No	No	unknown ppt 1	82.41	unknown ppt 1	82.41	No	T2_Spiked_After_Box1_Wz		-
2021-07-08	Spiked	After	1	1	-	Unidentified	Medium	Wizard	369	60.1	40.6	60.1	40.6	No	No	Unidentified	0	Unidentified	0	No	T2_Spiked_After_Box1_Wz		-
2021-07-08	Spiked	After	1	1	-	Natural Material - SPT ppt	Medium	Wizard	370	227.2	103.6	227.2	103.6	Yes	No	unknown ppt 1	84.6	unknown ppt 1	84.6	No	T2_Spiked_After_Box1_Wz		-
2021-07-08	Spiked	After	1	1	-	Natural Material - SPT ppt	Medium	Wizard	371	161.8	62.6	161.8	62.6	Yes	No	unknown ppt 1	76.75	unknown ppt 1	76.75	No	T2_Spiked_After_Box1_Wz		-
2021-07-08	Spiked	After	1	1	-	Natural Material - SPT ppt	Medium	Wizard	372	60.1	39.7	60.1	39.7	No	No	unknown ppt 1	77.63	unknown ppt 1	77.63	No	T2_Spiked_After_Box1_Wz		-
2021-07-08	Spiked	After	1	1	-	Natural Material - SPT ppt	Medium	Wizard	373	133.6	45.1	133.6	45.1	Yes	No	unknown ppt 1	77.98	unknown ppt 1	77.98	No	T2_Spiked_After_Box1_Wz		-
2021-07-08	Spiked	After	1	1	-	Unidentified	Medium	Wizard	374	73.5	58.8	73.5	58.8	No	No	Unidentified	0	Unidentified	0	No	T2_Spiked_After_Box1_Wz		-
2021-07-08	Spiked	After	1	1	-	Natural Material - SPT ppt	Medium	Wizard	375	60.1	46.3	60.1	46.3	No	No	unknown ppt 1	80.31	unknown ppt 1	80.31	No	T2_Spiked_After_Box1_Wz		-
2021-07-08	Spiked	After	1	1	-	Natural Material - SPT ppt	Medium	Wizard	376	100.2	35.7	100.2	35.7	Yes	No	unknown ppt 1	76.56	unknown ppt 1	76.56	No	T2_Spiked_After_Box1_Wz		-
2021-07-08	Spiked	After	1	1	-	Natural Material - SPT ppt	Medium	Wizard	377	60.1	48.2	60.1	48.2	No	No	unknown ppt 1	77.15	unknown ppt 1	77.15	No	T2_Spiked_After_Box1_Wz		-
2021-07-08	Spiked	After	1	1	-	Natural Material - SPT ppt	Medium	Wizard	378	207.1	68.3	207.1	68.3	Yes	No	unknown ppt 1	77.24	unknown ppt 1	77.24	No	T2_Spiked_After_Box1_Wz		-
2021-07-08	Spiked	After	1	1	-	Unidentified	Medium	Wizard	379	73.5	33.3	73.5	33.3	No	No	Unidentified	0	Unidentified	0	No	T2_Spiked_After_Box1_Wz		-
2021-07-08	Spiked	After	1	1	-	Natural Material - SPT ppt	Medium	Wizard	380	60.1	27.4	60.1	27.4	No	No	unknown ppt 1	81.86	unknown ppt 1	81.86	No	T2_Spiked_After_Box1_Wz		-
2021-07-08	Spiked	After	1	1	-	Natural Material - SPT ppt	Medium	Wizard	381	74.7	44.9	74.7	44.9	No	No	unknown ppt 1	78.99	unknown ppt 1	78.99	No	T2_Spiked_After_Box1_Wz		-
2021-07-08	Spiked	After	1	1	-	Unidentified	Medium	Wizard	382	194.6	97.3	194.6	97.3	Yes	No	Unidentified	0	Unidentified	0	No	T2_Spiked_After_Box1_Wz		-
2021-07-08	Spiked	After	1	1	-	Natural Material - SPT ppt	Medium	Wizard	383	291.9	58.8	291.9	58.8	Yes	No	unknown ppt 1	78.66	unknown ppt 1	78.66	No	T2_Spiked_After_Box1_Wz		-
2021-07-08	Spiked	After	1	1	-	Natural Material - SPT ppt	Medium	Wizard	384	74.7	59.4	74.7	59.4	No	No	unknown ppt 1	76.06	unknown ppt 1	76.06	No	T2_Spiked_After_Box1_Wz		-
2021-07-08	Spiked	After	1	1	-	Natural Material - SPT ppt	Medium	Wizard	385	60.1	46.3	60.1	46.3	No	No	unknown ppt 1	75.92	unknown ppt 1	75.92	No	T2_Spiked_After_Box1_Wz		-
2021-07-08	Spiked	After	1	1	-	Natural Material - SPT ppt	Medium	Wizard	386	80.2	32.6	80.2	32.6	No	No	unknown ppt 1	78.65	unknown ppt 1	78.65	No	T2_Spiked_After_Box1_Wz		-
2021-07-08	Spiked	After	1	1	-	Natural Material - SPT ppt	Medium	Wizard	387	207.1	70.8	207.1	70.8	Yes	No	unknown ppt 1	82.27	unknown ppt 1	82.27	No	T2_Spiked_After_Box1_Wz		-
2021-07-08	Spiked	After	1	1	-	Unidentified	Medium	Wizard	388	122.8	50	122.8	50	Yes	No	Unidentified	0	Unidentified	0	No	T2_Spiked_After_Box1_Wz		-
2021-07-08	Spiked	After	1	1	-	Natural Material - SPT ppt	Medium	Wizard	389	90.9	48.8	90.9	48.8	No	No	unknown ppt 1	76.97	unknown ppt 1	76.97	No	T2_Spiked_After_Box1_Wz		-
2021-07-08	Spiked	After	1	1	-	Unidentified	Medium	Wizard	390	116.9	61.8	116.9	61.8	Yes	No	Unidentified	0	Unidentified	0	No	T2_Spiked_After_Box1_Wz		-
2021-07-08	Spiked	After	1	1	-	Natural Material - SPT ppt	Medium	Wizard	391	113.6	32	113.6	32	Yes	No	unknown ppt 1	76.18	unknown ppt 1	76.18	No	T2_Spiked_After_Box1_Wz		-
2021-07-08	Spiked	After	1	1	-	Natural Material - SPT ppt	Medium	Wizard	392	66.8	34.9	66.8	34.9	No	No	unknown ppt 1	75.07	unknown ppt 1	75.07	No	T2_Spiked_After_Box1_Wz		-
2021-07-08	Spiked	After	1	1	-	Unidentified	Medium	Wizard	393	57.5	27.7	57.5	27.7	No	No	Unidentified	0	Unidentified	0	No	T2_Spiked_After_Box1_Wz		-
2021-07-08	Spiked	After	1	1	-	Unidentified	Medium	Wizard	394	105.6	35	105.6	35	Yes	No	Unidentified	0	Unidentified	0	No	T2_Spiked_After_Box1_Wz		-
2021-07-08	Spiked	After	1	1	-	Natural Material - SPT ppt	Medium	Wizard	395	168.6	77.2	168.6	77.2	Yes	No	unknown ppt 1	76.5	unknown ppt 1	76.5	No	T2_Spiked_After_Box1_Wz		-
2021-07-08	Spiked	After	1	1	-	Natural Material - SPT ppt	Medium	Wizard	396	53.5	19.1	53.5	19.1	No	No	unknown ppt 1	82.57	unknown ppt 1	82.57	No	T2_Spiked_After_Box1_Wz		-
2021-07-08	Spiked	After	1	1	-	Unidentified	Medium	Wizard	397	260.6	87.7	260.6	87.7	Yes	No	Unidentified	0	Unidentified	0	No	T2_Spiked_After_Box1_Wz		-
2021-07-08	Spiked	After	1	1	-	Natural Material - SPT ppt	Medium	Wizard	398	46.8	25.5	46.8	25.5	No	No	unknown ppt 1	83.71	unknown ppt 1	83.71	No	T2_Spiked_After_Box1_Wz		-
2021-07-08	Spiked	After	1	1	-	Unidentified	Medium	Wizard	399	87.1	41.1	87.1	41.1	No	No	Unidentified	0	Unidentified	0	No	T2_Spiked_After_Box1_Wz		-
2021-07-08	Spiked	After	1	1	-	Unidentified	Medium	Wizard	400	46.8	24.3	46.8	24.3	No	No	Unidentified	0	Unidentified	0	No	T2_Spiked_After_Box1_Wz		-
2021-07-08	Spiked	After	1	1	-	Unidentified	Medium	Wizard	401	48.2	29.5	48.2	29.5	No	No	Unidentified	0	Unidentified	0	No	T2_Spiked_After_Box1_Wz		-
2021-07-08	Spiked	After	1	1	-	Unidentified	Medium	Wizard	402	68.8	34.7	68.8	34.7	No	No	Unidentified	0	Unidentified	0	No	T2_Spiked_After_Box1_Wz		-
2021-07-08	Spiked	After	1	1	-	Natural Material - SPT ppt	Medium	Wizard	403	100.2	70.3	100.2	70.3	Yes	No	unknown ppt 1	78.43	unknown ppt 1	78.43	No	T2_Spiked_After_Box1_Wz		-
2021-07-08	Spiked	After	1	1	-	Natural Material - SPT ppt	Medium	Wizard	404	63	42.4	63	42.4	No	No	unknown ppt 1	85.99	unknown ppt 1	85.99	No	T2_Spiked_After_Box1_Wz		-
2021-07-08	Spiked	After	1	1	-	Natural Material - SPT ppt	Large	Wizard	405	388.5	91.3	388.5	91.3	Yes	No	unknown ppt 1	87.07	unknown ppt 1	87.07	No	T2_Spiked_After_Box1_Wz		-
2021-07-08	Spiked	After	1	1	-	Natural Material - SPT ppt	Medium	Wizard	406	86.9	38.6	86.9	38.6	No	No	unknown ppt 1	76.06	unknown ppt 1	76.06	No	T2_Spiked_After_Box1_Wz		-
2021-07-08	Spiked	After	1	1	-	Unidentified	Medium	Wizard	407	167	75.9	167	75.9	Yes	No	Unidentified	0	Unidentified	0	No	T2_Spiked_After_Box1_Wz		-
2021-07-08	Spiked	After	1	1	-	Natural Material - SPT ppt	Medium	Wizard	408	100.2	57.9	100.2	57.9	Yes	No	unknownppt 4	81.62	unknownppt 4	81.62	No	T2_Spiked_After_Box1_Wz		-
2021-07-08	Spiked	After	1	1	-	Natural Material - SPT ppt	Medium	Wizard	409	86.9	46.5	86.9	46.5	No	No	unknown ppt 3	77.21	unknown ppt 3	77.21	No	T2_Spiked_After_Box1_Wz		-
2021-07-08	Spiked	After	1	1	-	Unidentified	Medium	Wizard	410	221.3	95	221.3	95	Yes	No	Unidentified	0	Unidentified	0	No	T2_Spiked_After_Box1_Wz		-
2021-07-08	Spiked	After	1	1	-	Natural Material - SPT ppt	Medium	Wizard	411	200.5	93	200.5	93	Yes	No	unknown ppt 1	76.86	unknown ppt 1	76.86	No	T2_Spiked_After_Box1_Wz		-
2021-07-08	Spiked	After	1	1	-	Natural Material - SPT ppt	Medium	Wizard	412	185.8	94.2	185.8	94.2	Yes	No	unknown ppt 1	75.15	unknown ppt 1	75.15	No	T2_Spiked_After_Box1_Wz		-
2021-07-08	Spiked	After	1	1	-	Unidentified	Medium	Wizard	413	203.7	94.1	203.7	94.1	Yes	No	Unidentified	0	Unidentified	0	No	T2_Spiked_After_Box1_Wz		-
2021-07-08	Spiked	After	1	1	-	Unidentified	Medium	Wizard	414	194.2	86.3	194.2	86.3	Yes	No	Unidentified	0	Unidentified	0	No	T2_Spiked_After_Box1_Wz		-
2021-07-08	Spiked	After	1	1	-	Unidentified	Medium	Wizard	415	85	46.8	85	46.8	No	No	Unidentified	0	Unidentified	0	No	T2_Spiked_After_Box1_Wz		-
2021-07-08	Spiked	After	1	1	-	Natural Material - SPT ppt	Medium	Wizard	416	87.1	56.8	87.1	56.8	No	No	unknownppt 4	78.46	unknownppt 4	78.46	No	T2_Spiked_After_Box1_Wz		-
2021-07-08	Spiked	After	1	1	-	HDPE	Medium	Wizard	417	194.2	69.4	194.2	69.4	Yes	No	HDPE_sedimentproject_1	77.9	HDPE_sedimentproject_1	77.9	No	T2_Spiked_After_Box1_Wz		yes
2021-07-08	Spiked	After	1	1	-	Natural Material - SPT ppt	Medium	Wizard	418	46.8	45	46.8	45	No	No	unknown ppt 3	87.31	unknown ppt 3	87.31	No	T2_Spiked_After_Box1_Wz		-
2021-07-08	Spiked	After	1	1	-	Natural Material - SPT ppt	Medium	Wizard	419	196.5	80.4	196.5	80.4	Yes	No	unknown ppt 1	86.55	unknown ppt 1	86.55	No	T2_Spiked_After_Box1_Wz		-
2021-07-08	Spiked	After	1	1	-	Natural Material - Crumb Rubber Changed	Large	Wizard	420	534	205.5	534	205.5	Yes	No	CR300PLUS_11	85.39	CR300PLUS_11	85.39	No	T2_Spiked_After_Box1_Wz	no black particle under point, may just be carbon based natural material	no
2021-07-08	Spiked	After	1	1	-	Unidentified	Medium	Wizard	421	74.7	53.3	74.7	53.3	No	No	Unidentified	0	Unidentified	0	No	T2_Spiked_After_Box1_Wz		-
2021-07-08	Spiked	After	1	1	-	Unidentified	Medium	Wizard	422	80.2	26.9	80.2	26.9	No	No	Unidentified	0	Unidentified	0	No	T2_Spiked_After_Box1_Wz		-
2021-07-08	Spiked	After	1	1	-	Unidentified	Medium	Wizard	423	46.8	26.7	46.8	26.7	No	No	Unidentified	0	Unidentified	0	No	T2_Spiked_After_Box1_Wz		-
2021-07-08	Spiked	After	1	1	-	Natural Material - SPT ppt	Medium	Wizard	424	80.2	36.9	80.2	36.9	No	No	unknown ppt 1	88.3	unknown ppt 1	88.3	No	T2_Spiked_After_Box1_Wz		-
2021-07-08	Spiked	After	1	1	-	Natural Material - SPT ppt	Medium	Wizard	425	176.5	63.1	176.5	63.1	Yes	No	unknown ppt 1	89.36	unknown ppt 1	89.36	No	T2_Spiked_After_Box1_Wz		-
2021-07-08	Spiked	After	1	1	-	Natural Material - SPT ppt	Medium	Wizard	426	61.6	42.4	61.6	42.4	No	No	unknown ppt 1	80.28	unknown ppt 1	80.28	No	T2_Spiked_After_Box1_Wz		-
2021-07-08	Spiked	After	1	1	-	Unidentified	Large	Wizard	427	340.2	71.7	340.2	71.7	Yes	No	Unidentified	0	Unidentified	0	No	T2_Spiked_After_Box1_Wz		-
2021-07-08	Spiked	After	1	1	-	Natural Material - SPT ppt	Medium	Wizard	428	196.5	58.1	196.5	58.1	Yes	No	unknown ppt 1	76.72	unknown ppt 1	76.72	No	T2_Spiked_After_Box1_Wz		-
2021-07-08	Spiked	After	1	1	-	Natural Material - SPT ppt	Medium	Wizard	429	60.1	22.7	60.1	22.7	No	No	unknown ppt 1	75.97	unknown ppt 1	75.97	No	T2_Spiked_After_Box1_Wz		-
2021-07-08	Spiked	After	1	1	-	Natural Material	Large	Wizard	430	501.1	191.6	501.1	191.6	Yes	No	NYLON6300PLUS_2	83.29	NYLON6300PLUS_2	83.29	No	T2_Spiked_After_Box1_Wz		yes
2021-07-08	Spiked	After	1	1	-	Natural Material - SPT ppt	Medium	Wizard	431	122.8	61.1	122.8	61.1	Yes	No	unknown ppt 1	82.05	unknown ppt 1	82.05	No	T2_Spiked_After_Box1_Wz		-
2021-07-08	Spiked	After	1	1	-	Unidentified	Medium	Wizard	432	46.8	36.5	46.8	36.5	No	No	Unidentified	0	Unidentified	0	No	T2_Spiked_After_Box1_Wz		-
2021-07-08	Spiked	After	1	1	-	Natural Material - SPT ppt	Medium	Wizard	433	66.8	45.1	66.8	45.1	No	No	unknown ppt 1	77.81	unknown ppt 1	77.81	No	T2_Spiked_After_Box1_Wz		-
2021-07-08	Spiked	After	1	1	-	HDPE	Large	Wizard	434	956.3	293.2	956.3	293.2	Yes	No	LLDPE_Biohaz_b	91.95	LLDPE_Biohaz_b	91.95	No	T2_Spiked_After_Box1_Wz		yes
2021-07-08	Spiked	After	1	1	-	Natural Material - SPT ppt	Medium	Wizard	435	86.9	59.6	86.9	59.6	No	No	unknown ppt 1	81.96	unknown ppt 1	81.96	No	T2_Spiked_After_Box1_Wz		-
2021-07-08	Spiked	After	1	1	-	Natural Material - SPT ppt	Medium	Wizard	436	173.7	104.1	173.7	104.1	Yes	No	unknown ppt 1	80.58	unknown ppt 1	80.58	No	T2_Spiked_After_Box1_Wz		-
2021-07-08	Spiked	After	1	1	-	Unidentified	Medium	Wizard	437	93.5	34.6	93.5	34.6	No	No	Unidentified	0	Unidentified	0	No	T2_Spiked_After_Box1_Wz		-
2021-07-08	Spiked	After	1	1	-	Natural Material - SPT ppt	Medium	Wizard	438	156.4	51.6	156.4	51.6	Yes	No	unknown ppt 1	82.91	unknown ppt 1	82.91	No	T2_Spiked_After_Box1_Wz		-
2021-07-08	Spiked	After	1	1	-	Natural Material - SPT ppt	Medium	Wizard	439	60.1	23.6	60.1	23.6	No	No	unknown ppt 1	80.67	unknown ppt 1	80.67	No	T2_Spiked_After_Box1_Wz		-
2021-07-08	Spiked	After	1	1	-	Unidentified	Medium	Wizard	440	100.2	27.8	100.2	27.8	Yes	No	Unidentified	0	Unidentified	0	No	T2_Spiked_After_Box1_Wz		-
2021-07-08	Spiked	After	1	1	-	Natural Material - SPT ppt	Medium	Wizard	441	80.2	45.4	80.2	45.4	No	No	unknown ppt 1	80.72	unknown ppt 1	80.72	No	T2_Spiked_After_Box1_Wz		-
2021-07-08	Spiked	After	1	1	-	Unidentified	Medium	Wizard	442	86.9	26.2	86.9	26.2	No	No	Unidentified	0	Unidentified	0	No	T2_Spiked_After_Box1_Wz		-
2021-07-08	Spiked	After	1	1	-	Natural Material - SPT ppt	Medium	Wizard	443	100.2	50.5	100.2	50.5	Yes	No	unknown ppt 1	77.01	unknown ppt 1	77.01	No	T2_Spiked_After_Box1_Wz		-
2021-07-08	Spiked	After	1	1	-	Natural Material - SPT ppt	Large	Wizard	444	333.6	91.3	333.6	91.3	Yes	No	unknown ppt 1	80.88	unknown ppt 1	80.88	No	T2_Spiked_After_Box1_Wz		-
2021-07-08	Spiked	After	1	1	-	Unidentified	Medium	Wizard	445	66.8	50.2	66.8	50.2	No	No	Unidentified	0	Unidentified	0	No	T2_Spiked_After_Box1_Wz		-
2021-07-08	Spiked	After	1	1	-	Natural Material - SPT ppt	Medium	Wizard	446	77.9	28.5	77.9	28.5	No	No	unknown ppt 1	90.37	unknown ppt 1	90.37	No	T2_Spiked_After_Box1_Wz		-
2021-07-08	Spiked	After	1	1	-	Unidentified	Medium	Wizard	447	127	50.6	127	50.6	Yes	No	Unidentified	0	Unidentified	0	No	T2_Spiked_After_Box1_Wz		-
2021-07-08	Spiked	After	1	1	-	Natural Material - SPT ppt	Medium	Wizard	448	48.2	44.8	48.2	44.8	No	No	unknown ppt 1	76.66	unknown ppt 1	76.66	No	T2_Spiked_After_Box1_Wz		-
2021-07-08	Spiked	After	1	1	-	Unidentified	Medium	Wizard	449	129.7	94.2	129.7	94.2	Yes	No	Unidentified	0	Unidentified	0	No	T2_Spiked_After_Box1_Wz		-
2021-07-08	Spiked	After	1	1	-	Natural Material - SPT ppt	Medium	Wizard	450	53.5	23.4	53.5	23.4	No	No	unknown ppt 1	86.64	unknown ppt 1	86.64	No	T2_Spiked_After_Box1_Wz		-
2021-07-08	Spiked	After	1	1	-	Natural Material - SPT ppt	Medium	Wizard	451	73.5	24.7	73.5	24.7	No	No	unknown ppt 1	88.03	unknown ppt 1	88.03	No	T2_Spiked_After_Box1_Wz		-
2021-07-08	Spiked	After	1	1	-	Natural Material - SPT ppt	Medium	Wizard	452	66.8	29.8	66.8	29.8	No	No	unknown ppt 1	80.84	unknown ppt 1	80.84	No	T2_Spiked_After_Box1_Wz		-
2021-07-08	Spiked	After	1	1	-	Unidentified	Medium	Wizard	453	293.1	94.3	293.1	94.3	Yes	No	Unidentified	0	Unidentified	0	No	T2_Spiked_After_Box1_Wz		-
2021-07-08	Spiked	After	1	1	-	Natural Material - SPT ppt	Medium	Wizard	454	63	45.1	63	45.1	No	No	unknown ppt 1	75.54	unknown ppt 1	75.54	No	T2_Spiked_After_Box1_Wz		-
2021-07-08	Spiked	After	1	1	-	Natural Material - SPT ppt	Medium	Wizard	455	60.1	50.1	60.1	50.1	No	No	unknown ppt 1	78.83	unknown ppt 1	78.83	No	T2_Spiked_After_Box1_Wz		-
2021-07-08	Spiked	After	1	1	-	Natural Material - SPT ppt	Large	Wizard	456	506.5	162.2	506.5	162.2	Yes	No	unknown ppt 1	85.01	unknown ppt 1	85.01	No	T2_Spiked_After_Box1_Wz		-
2021-07-08	Spiked	After	1	1	-	Natural Material - SPT ppt	Medium	Wizard	457	113.6	64.1	113.6	64.1	Yes	No	unknown ppt 1	85.21	unknown ppt 1	85.21	No	T2_Spiked_After_Box1_Wz		-
2021-07-08	Spiked	After	1	1	-	Natural Material - SPT ppt	Medium	Wizard	458	46.8	21.9	46.8	21.9	No	No	unknown ppt 1	79.15	unknown ppt 1	79.15	No	T2_Spiked_After_Box1_Wz		-
2021-07-08	Spiked	After	1	1	-	Natural Material - SPT ppt	Medium	Wizard	459	86.9	37.3	86.9	37.3	No	No	unknown ppt 1	77.66	unknown ppt 1	77.66	No	T2_Spiked_After_Box1_Wz		-
2021-07-08	Spiked	After	1	1	-	Natural Material - SPT ppt	Medium	Wizard	460	215.9	87.9	215.9	87.9	Yes	No	unknown ppt 1	83.03	unknown ppt 1	83.03	No	T2_Spiked_After_Box1_Wz		-
2021-07-08	Spiked	After	1	1	-	Natural Material - SPT ppt	Medium	Wizard	461	46.8	24.3	46.8	24.3	No	No	unknown ppt 1	85.54	unknown ppt 1	85.54	No	T2_Spiked_After_Box1_Wz		-
2021-07-08	Spiked	After	1	1	-	Natural Material - SPT ppt	Large	Wizard	462	458.8	135.2	458.8	135.2	Yes	No	unknown ppt 1	86.79	unknown ppt 1	86.79	No	T2_Spiked_After_Box1_Wz		-
2021-07-08	Spiked	After	1	1	-	Natural Material - SPT ppt	Medium	Wizard	463	76.2	26.9	76.2	26.9	No	No	unknown ppt 1	85.11	unknown ppt 1	85.11	No	T2_Spiked_After_Box1_Wz		-
2021-07-08	Spiked	After	1	1	-	Natural Material - SPT ppt	Medium	Wizard	464	46.8	25.5	46.8	25.5	No	No	unknown ppt 1	79.33	unknown ppt 1	79.33	No	T2_Spiked_After_Box1_Wz		-
2021-07-08	Spiked	After	1	1	-	Unidentified	Medium	Wizard	465	120.3	25.1	120.3	25.1	Yes	No	Unidentified	0	Unidentified	0	No	T2_Spiked_After_Box1_Wz		-
2021-07-08	Spiked	After	1	1	-	Natural Material - SPT ppt	Medium	Wizard	466	66.8	52.7	66.8	52.7	No	No	unknown ppt 1	82.33	unknown ppt 1	82.33	No	T2_Spiked_After_Box1_Wz		-
2021-07-08	Spiked	After	1	1	-	Unidentified	Medium	Wizard	467	83.7	42.1	83.7	42.1	No	No	Unidentified	0	Unidentified	0	No	T2_Spiked_After_Box1_Wz		-
2021-07-08	Spiked	After	1	1	-	Natural Material - SPT ppt	Medium	Wizard	468	46.8	24.3	46.8	24.3	No	No	unknown ppt 1	75.15	unknown ppt 1	75.15	No	T2_Spiked_After_Box1_Wz		-
2021-07-08	Spiked	After	1	1	-	PP	Large	Wizard	469	849.5	269.7	849.5	269.7	Yes	No	PP300LUS_10	88.57	PP300LUS_10	88.57	No	T2_Spiked_After_Box1_Wz		yes
2021-07-08	Spiked	After	1	1	-	Unidentified	Medium	Wizard	470	106.9	54.8	106.9	54.8	Yes	No	Unidentified	0	Unidentified	0	No	T2_Spiked_After_Box1_Wz		-
2021-07-08	Spiked	After	1	1	-	Unidentified	Medium	Wizard	471	60.1	33.1	60.1	33.1	No	No	Unidentified	0	Unidentified	0	No	T2_Spiked_After_Box1_Wz		-
2021-07-08	Spiked	After	1	1	-	Unidentified	Medium	Wizard	472	46.8	37.7	46.8	37.7	No	No	Unidentified	0	Unidentified	0	No	T2_Spiked_After_Box1_Wz		-
2021-07-08	Spiked	After	1	1	-	Natural Material - SPT ppt	Medium	Wizard	473	60.1	34	60.1	34	No	No	unknown ppt 1	83.58	unknown ppt 1	83.58	No	T2_Spiked_After_Box1_Wz		-
2021-07-08	Spiked	After	1	1	-	Natural Material - SPT ppt	Medium	Wizard	474	243.2	86.2	243.2	86.2	Yes	No	unknown ppt 1	84.8	unknown ppt 1	84.8	No	T2_Spiked_After_Box1_Wz		-
2021-07-08	Spiked	After	1	1	-	Natural Material - SPT ppt	Medium	Wizard	475	60.1	41.6	60.1	41.6	No	No	unknown ppt 1	82.15	unknown ppt 1	82.15	No	T2_Spiked_After_Box1_Wz		-
2021-07-08	Spiked	After	1	1	-	Unidentified	Medium	Wizard	476	100.2	27.2	100.2	27.2	Yes	No	Unidentified	0	Unidentified	0	No	T2_Spiked_After_Box1_Wz		-
2021-07-08	Spiked	After	1	1	-	Natural Material - SPT ppt	Medium	Wizard	477	183.5	49.9	183.5	49.9	Yes	No	unknown ppt 1	78.68	unknown ppt 1	78.68	No	T2_Spiked_After_Box1_Wz		-
2021-07-08	Spiked	After	1	1	-	Unidentified	Medium	Wizard	478	66.8	57.9	66.8	57.9	No	No	Unidentified	0	Unidentified	0	No	T2_Spiked_After_Box1_Wz		-
2021-07-08	Spiked	After	1	1	-	Natural Material - SPT ppt	Medium	Wizard	479	100.2	34.6	100.2	34.6	Yes	No	unknown ppt 1	83.71	unknown ppt 1	83.71	No	T2_Spiked_After_Box1_Wz		-
2021-07-08	Spiked	After	1	1	-	Natural Material - SPT ppt	Medium	Wizard	480	46.8	24.3	46.8	24.3	No	No	unknown ppt 1	75.6	unknown ppt 1	75.6	No	T2_Spiked_After_Box1_Wz		-
2021-07-08	Spiked	After	1	1	-	Natural Material - SPT ppt	Medium	Wizard	481	107.7	55.9	107.7	55.9	Yes	No	unknown ppt 1	78.4	unknown ppt 1	78.4	No	T2_Spiked_After_Box1_Wz		-
2021-07-08	Spiked	After	1	1	-	Natural Material - cellulosic	Medium	Wizard	482	167.4	129.3	167.4	129.3	Yes	No	OrangeCottonLabCoat4	83.7	OrangeCottonLabCoat4	83.7	No	T2_Spiked_After_Box1_Wz	fragment not Fiber, not orange	-
2021-07-08	Spiked	After	1	1	-	Natural Material - SPT ppt	Medium	Wizard	483	86.9	55	86.9	55	No	No	unknown ppt 1	80.61	unknown ppt 1	80.61	No	T2_Spiked_After_Box1_Wz		-
2021-07-08	Spiked	After	1	1	-	Natural Material - SPT ppt	Large	Wizard	484	334.1	98.2	334.1	98.2	Yes	No	unknown ppt 1	87.36	unknown ppt 1	87.36	No	T2_Spiked_After_Box1_Wz		-
2021-07-08	Spiked	After	1	1	-	Unidentified	Medium	Wizard	485	60.1	54.8	60.1	54.8	No	No	Unidentified	0	Unidentified	0	No	T2_Spiked_After_Box1_Wz		-
2021-07-08	Spiked	After	1	1	-	Natural Material - SPT ppt	Medium	Wizard	486	120.3	66.2	120.3	66.2	Yes	No	unknown ppt 1	86.54	unknown ppt 1	86.54	No	T2_Spiked_After_Box1_Wz		-
2021-07-08	Spiked	After	1	1	-	Natural Material - SPT ppt	Medium	Wizard	487	180.4	88.9	180.4	88.9	Yes	No	unknown ppt 1	85.11	unknown ppt 1	85.11	No	T2_Spiked_After_Box1_Wz		-
2021-07-08	Spiked	After	1	1	-	Natural Material - SPT ppt	Medium	Wizard	488	60.1	31.2	60.1	31.2	No	No	unknown ppt 1	75.25	unknown ppt 1	75.25	No	T2_Spiked_After_Box1_Wz		-
2021-07-08	Spiked	After	1	1	-	Natural Material - SPT ppt	Large	Wizard	489	1138.1	174.3	1138.1	174.3	Yes	No	unknown ppt 1	77.14	unknown ppt 1	77.14	No	T2_Spiked_After_Box1_Wz		-
2021-07-08	Spiked	After	1	1	-	Natural Material - SPT ppt	Medium	Wizard	490	46.8	25.5	46.8	25.5	No	No	unknown ppt 1	83.85	unknown ppt 1	83.85	No	T2_Spiked_After_Box1_Wz		-
2021-07-08	Spiked	After	1	1	-	Natural Material - SPT ppt	Large	Wizard	491	319.4	88.6	319.4	88.6	Yes	No	unknown ppt 1	87.97	unknown ppt 1	87.97	No	T2_Spiked_After_Box1_Wz		-
2021-07-08	Spiked	After	1	1	-	Natural Material - SPT ppt	Medium	Wizard	492	95.7	55.3	95.7	55.3	No	No	unknown ppt 1	82.53	unknown ppt 1	82.53	No	T2_Spiked_After_Box1_Wz		-
2021-07-08	Spiked	After	1	1	-	Natural Material - SPT ppt	Medium	Wizard	493	119.5	68	119.5	68	Yes	No	unknown ppt 1	86.86	unknown ppt 1	86.86	No	T2_Spiked_After_Box1_Wz		-
2021-07-08	Spiked	After	1	1	-	Unidentified	Medium	Wizard	494	73.5	35.6	73.5	35.6	No	No	Unidentified	0	Unidentified	0	No	T2_Spiked_After_Box1_Wz		-
2021-07-08	Spiked	After	1	1	-	Unidentified	Medium	Wizard	495	57.5	36.6	57.5	36.6	No	No	Unidentified	0	Unidentified	0	No	T2_Spiked_After_Box1_Wz		-
2021-07-08	Spiked	After	1	1	-	Natural Material - SPT ppt	Medium	Wizard	496	61.6	37.8	61.6	37.8	No	No	unknown ppt 1	83.71	unknown ppt 1	83.71	No	T2_Spiked_After_Box1_Wz		-
2021-07-08	Spiked	After	1	1	-	Natural Material - SPT ppt	Medium	Wizard	497	80.2	52.5	80.2	52.5	No	No	unknown ppt 1	79.83	unknown ppt 1	79.83	No	T2_Spiked_After_Box1_Wz		-
2021-07-08	Spiked	After	1	1	-	Natural Material - SPT ppt	Medium	Wizard	498	287.4	51.6	287.4	51.6	Yes	No	unknown ppt 1	76.54	unknown ppt 1	76.54	No	T2_Spiked_After_Box1_Wz		-
2021-07-08	Spiked	After	1	1	-	Natural Material - SPT ppt	Medium	Wizard	499	167	63	167	63	Yes	No	unknown ppt 1	86.68	unknown ppt 1	86.68	No	T2_Spiked_After_Box1_Wz		-
2021-07-08	Spiked	After	1	1	-	Natural Material - SPT ppt	Medium	Wizard	500	90.9	28.8	90.9	28.8	No	No	unknown ppt 1	86.81	unknown ppt 1	86.81	No	T2_Spiked_After_Box1_Wz		-
2021-07-08	Spiked	After	1	1	-	PS	Large	Wizard	501	979.1	451.3	979.1	451.3	Yes	No	PS_CI_hard_e	98.83	PS_CI_hard_e	98.83	No	T2_Spiked_After_Box1_Wz		yes
2021-07-08	Spiked	After	1	1	-	Natural Material - SPT ppt	Medium	Wizard	502	109.6	64.3	109.6	64.3	Yes	No	unknown ppt 1	89.56	unknown ppt 1	89.56	No	T2_Spiked_After_Box1_Wz		-
2021-07-08	Spiked	After	1	1	-	Unidentified	Medium	Wizard	503	140.3	70.9	140.3	70.9	Yes	No	Unidentified	0	Unidentified	0	No	T2_Spiked_After_Box1_Wz		-
2021-07-08	Spiked	After	1	1	-	Unidentified	Medium	Wizard	504	120.3	66.6	120.3	66.6	Yes	No	Unidentified	0	Unidentified	0	No	T2_Spiked_After_Box1_Wz		-
2021-07-08	Spiked	After	1	1	-	Unidentified	Medium	Wizard	505	137.7	71.8	137.7	71.8	Yes	No	Unidentified	0	Unidentified	0	No	T2_Spiked_After_Box1_Wz		-
2021-07-08	Spiked	After	1	1	-	Unidentified	Medium	Wizard	506	73.5	52.6	73.5	52.6	No	No	Unidentified	0	Unidentified	0	No	T2_Spiked_After_Box1_Wz		-
2021-07-08	Spiked	After	1	1	-	Natural Material - SPT ppt	Medium	Wizard	507	86.9	69.4	86.9	69.4	No	No	unknown ppt 1	80.69	unknown ppt 1	80.69	No	T2_Spiked_After_Box1_Wz		-
2021-07-08	Spiked	After	1	1	-	Unidentified	Medium	Wizard	508	80.2	39.7	80.2	39.7	No	No	Unidentified	0	Unidentified	0	No	T2_Spiked_After_Box1_Wz		-
2021-07-08	Spiked	After	1	1	-	Unidentified	Medium	Wizard	509	57.5	22.7	57.5	22.7	No	No	Unidentified	0	Unidentified	0	No	T2_Spiked_After_Box1_Wz		-
2021-07-08	Spiked	After	1	1	-	Natural Material - SPT ppt	Medium	Wizard	510	173.7	55.3	173.7	55.3	Yes	No	unknown ppt 1	84.89	unknown ppt 1	84.89	No	T2_Spiked_After_Box1_Wz		-
2021-07-08	Spiked	After	1	1	-	Unidentified	Medium	Wizard	511	93.5	41.9	93.5	41.9	No	No	Unidentified	0	Unidentified	0	No	T2_Spiked_After_Box1_Wz		-
2021-07-08	Spiked	After	1	1	-	Natural Material - SPT ppt	Medium	Wizard	512	113.6	74.1	113.6	74.1	Yes	No	unknown ppt 1	82.15	unknown ppt 1	82.15	No	T2_Spiked_After_Box1_Wz		-
2021-07-08	Spiked	After	1	1	-	Natural Material - SPT ppt	Medium	Wizard	513	279.2	83.9	279.2	83.9	Yes	No	unknown ppt 1	76.91	unknown ppt 1	76.91	No	T2_Spiked_After_Box1_Wz		-
2021-07-08	Spiked	After	1	1	-	Unidentified	Medium	Wizard	514	86.9	77.9	86.9	77.9	No	No	Unidentified	0	Unidentified	0	No	T2_Spiked_After_Box1_Wz		-
2021-07-08	Spiked	After	1	1	-	Unidentified	Medium	Wizard	515	60.1	51	60.1	51	No	No	Unidentified	0	Unidentified	0	No	T2_Spiked_After_Box1_Wz		-
2021-07-08	Spiked	After	1	1	-	Unidentified	Medium	Wizard	516	53.5	36.2	53.5	36.2	No	No	Unidentified	0	Unidentified	0	No	T2_Spiked_After_Box1_Wz		-
2021-07-08	Spiked	After	1	1	-	Unidentified	Medium	Wizard	517	93.5	21.3	93.5	21.3	No	No	Unidentified	0	Unidentified	0	No	T2_Spiked_After_Box1_Wz		-
2021-07-08	Spiked	After	1	1	-	Natural Material - SPT ppt	Medium	Wizard	518	86.9	32.7	86.9	32.7	No	No	unknown ppt 1	84.48	unknown ppt 1	84.48	No	T2_Spiked_After_Box1_Wz		-
2021-07-08	Spiked	After	1	1	-	Unidentified	Medium	Wizard	519	133.6	45.9	133.6	45.9	Yes	No	Unidentified	0	Unidentified	0	No	T2_Spiked_After_Box1_Wz		-
2021-07-08	Spiked	After	1	1	-	Natural Material - SPT ppt	Large	Wizard	520	316.9	110.5	316.9	110.5	Yes	No	unknown ppt 1	76.12	unknown ppt 1	76.12	No	T2_Spiked_After_Box1_Wz		-
2021-07-08	Spiked	After	1	1	-	Unidentified	Medium	Wizard	521	160.4	42.9	160.4	42.9	Yes	No	Unidentified	0	Unidentified	0	No	T2_Spiked_After_Box1_Wz		-
2021-07-08	Spiked	After	1	1	-	Unidentified	Medium	Wizard	522	93.5	58.9	93.5	58.9	No	No	Unidentified	0	Unidentified	0	No	T2_Spiked_After_Box1_Wz		-
2021-07-08	Spiked	After	1	1	-	Unidentified	Medium	Wizard	523	198.7	70.4	198.7	70.4	Yes	No	Unidentified	0	Unidentified	0	No	T2_Spiked_After_Box1_Wz		-
2021-07-08	Spiked	After	1	1	-	Natural Material - SPT ppt	Medium	Wizard	524	46.8	24.3	46.8	24.3	No	No	unknown ppt 1	85.55	unknown ppt 1	85.55	No	T2_Spiked_After_Box1_Wz		-
2021-07-08	Spiked	After	1	1	-	Unidentified	Medium	Wizard	525	46.8	23.1	46.8	23.1	No	No	Unidentified	0	Unidentified	0	No	T2_Spiked_After_Box1_Wz		-
2021-07-08	Spiked	After	1	1	-	Unidentified	Medium	Wizard	526	155.4	66.6	155.4	66.6	Yes	No	Unidentified	0	Unidentified	0	No	T2_Spiked_After_Box1_Wz		-
2021-07-08	Spiked	After	1	1	-	Natural Material - SPT ppt	Medium	Wizard	527	113.6	64.1	113.6	64.1	Yes	No	unknown ppt 1	75.37	unknown ppt 1	75.37	No	T2_Spiked_After_Box1_Wz		-
2021-07-08	Spiked	After	1	1	-	Unidentified	Medium	Wizard	528	60.1	28.4	60.1	28.4	No	No	Unidentified	0	Unidentified	0	No	T2_Spiked_After_Box1_Wz		-
2021-07-08	Spiked	After	1	1	-	Natural Material - SPT ppt	Medium	Wizard	529	53.9	27.4	53.9	27.4	No	No	unknown ppt 1	89.71	unknown ppt 1	89.71	No	T2_Spiked_After_Box1_Wz		-
2021-07-08	Spiked	After	1	1	-	Unidentified	Medium	Wizard	530	61.6	27.7	61.6	27.7	No	No	Unidentified	0	Unidentified	0	No	T2_Spiked_After_Box1_Wz		-
2021-07-08	Spiked	After	1	1	-	Unidentified	Medium	Wizard	531	213.5	53.8	213.5	53.8	Yes	No	Unidentified	0	Unidentified	0	No	T2_Spiked_After_Box1_Wz		-
2021-07-08	Spiked	After	1	1	-	Unidentified	Medium	Wizard	532	127	42.5	127	42.5	Yes	No	Unidentified	0	Unidentified	0	No	T2_Spiked_After_Box1_Wz		-
2021-07-08	Spiked	After	1	1	-	Natural Material - SPT ppt	Medium	Wizard	533	46.8	17	46.8	17	No	No	unknown ppt 1	87.35	unknown ppt 1	87.35	No	T2_Spiked_After_Box1_Wz		-
2021-07-08	Spiked	After	1	1	-	Natural Material - SPT ppt	Medium	Wizard	534	160.4	59.6	160.4	59.6	Yes	No	unknown ppt 1	86.19	unknown ppt 1	86.19	No	T2_Spiked_After_Box1_Wz		-
2021-07-08	Spiked	After	1	1	-	Unidentified	Medium	Wizard	535	135.3	63.4	135.3	63.4	Yes	No	Unidentified	0	Unidentified	0	No	T2_Spiked_After_Box1_Wz		-
2021-07-08	Spiked	After	1	1	-	Natural Material - SPT ppt	Medium	Wizard	536	46.8	41.3	46.8	41.3	No	No	unknown ppt 1	77.39	unknown ppt 1	77.39	No	T2_Spiked_After_Box1_Wz		-
2021-07-08	Spiked	After	1	1	-	Unidentified	Medium	Wizard	537	133.6	30.6	133.6	30.6	Yes	No	Unidentified	0	Unidentified	0	No	T2_Spiked_After_Box1_Wz		-
2021-07-08	Spiked	After	1	1	-	Natural Material - SPT ppt	Medium	Wizard	538	120.5	52.4	120.5	52.4	Yes	No	unknown ppt 1	75.17	unknown ppt 1	75.17	No	T2_Spiked_After_Box1_Wz		-
2021-07-08	Spiked	After	1	1	-	Unidentified	Medium	Wizard	539	46.8	42.5	46.8	42.5	No	No	Unidentified	0	Unidentified	0	No	T2_Spiked_After_Box1_Wz		-
2021-07-08	Spiked	After	1	1	-	Natural Material - SPT ppt	Medium	Wizard	540	86.9	42.5	86.9	42.5	No	No	unknown ppt 1	75.81	unknown ppt 1	75.81	No	T2_Spiked_After_Box1_Wz		-
2021-07-08	Spiked	After	1	1	-	Natural Material - SPT ppt	Medium	Wizard	541	95	53.9	95	53.9	No	No	unknown ppt 1	76.91	unknown ppt 1	76.91	No	T2_Spiked_After_Box1_Wz		-
2021-07-08	Spiked	After	1	1	-	Unidentified	Medium	Wizard	542	80.2	22	80.2	22	No	No	Unidentified	0	Unidentified	0	No	T2_Spiked_After_Box1_Wz		-
2021-07-08	Spiked	After	1	1	-	Natural Material - SPT ppt	Medium	Wizard	543	203.7	96.6	203.7	96.6	Yes	No	unknown ppt 1	76.76	unknown ppt 1	76.76	No	T2_Spiked_After_Box1_Wz		-
2021-07-08	Spiked	After	1	1	-	Natural Material - SPT ppt	Medium	Wizard	544	245.7	80.8	245.7	80.8	Yes	No	unknown ppt 1	79.99	unknown ppt 1	79.99	No	T2_Spiked_After_Box1_Wz		-
2021-07-08	Spiked	After	1	1	-	Unidentified	Medium	Wizard	545	274	54.4	274	54.4	Yes	No	Unidentified	0	Unidentified	0	No	T2_Spiked_After_Box1_Wz		-
2021-07-08	Spiked	After	1	1	-	Unidentified	Large	Wizard	546	367.5	60.9	367.5	60.9	Yes	No	Unidentified	0	Unidentified	0	No	T2_Spiked_After_Box1_Wz		-
2021-07-08	Spiked	After	1	1	-	Natural Material - SPT ppt	Medium	Wizard	547	132.6	68.6	132.6	68.6	Yes	No	unknown ppt 1	80.56	unknown ppt 1	80.56	No	T2_Spiked_After_Box1_Wz		-
2021-07-08	Spiked	After	1	1	-	Natural Material - SPT ppt	Medium	Wizard	548	66.8	31.5	66.8	31.5	No	No	unknown ppt 1	75.03	unknown ppt 1	75.03	No	T2_Spiked_After_Box1_Wz		-
2021-07-08	Spiked	After	1	1	-	Unidentified	Medium	Wizard	549	86.9	28.8	86.9	28.8	No	No	Unidentified	0	Unidentified	0	No	T2_Spiked_After_Box1_Wz		-
2021-07-08	Spiked	After	1	1	-	Natural Material - SPT ppt	Medium	Wizard	550	247.2	62.5	247.2	62.5	Yes	No	unknown ppt 1	79.6	unknown ppt 1	79.6	No	T2_Spiked_After_Box1_Wz		-
2021-07-08	Spiked	After	1	1	-	Unidentified	Medium	Wizard	551	95	28.1	95	28.1	No	No	Unidentified	0	Unidentified	0	No	T2_Spiked_After_Box1_Wz		-
2021-07-08	Spiked	After	1	1	-	Natural Material - SPT ppt	Medium	Wizard	552	193.8	69.5	193.8	69.5	Yes	No	unknown ppt 1	86.46	unknown ppt 1	86.46	No	T2_Spiked_After_Box1_Wz		-
2021-07-08	Spiked	After	1	1	-	Natural Material - SPT ppt	Medium	Wizard	553	133.6	45.9	133.6	45.9	Yes	No	unknown ppt 1	78.22	unknown ppt 1	78.22	No	T2_Spiked_After_Box1_Wz		-
2021-07-08	Spiked	After	1	1	-	Natural Material - SPT ppt	Large	Wizard	554	310.9	103.5	310.9	103.5	Yes	No	unknown ppt 1	75.26	unknown ppt 1	75.26	No	T2_Spiked_After_Box1_Wz		-
2021-07-08	Spiked	After	1	1	-	Natural Material - SPT ppt	Medium	Wizard	555	116.9	56.9	116.9	56.9	Yes	No	unknown ppt 1	86.24	unknown ppt 1	86.24	No	T2_Spiked_After_Box1_Wz		-
2021-07-08	Spiked	After	1	1	-	Natural Material - SPT ppt	Medium	Wizard	556	267.4	94	267.4	94	Yes	No	unknown ppt 1	80.8	unknown ppt 1	80.8	No	T2_Spiked_After_Box1_Wz		-
2021-07-08	Spiked	After	1	1	-	Unidentified	Medium	Wizard	557	46.8	26.7	46.8	26.7	No	No	Unidentified	0	Unidentified	0	No	T2_Spiked_After_Box1_Wz		-
2021-07-08	Spiked	After	1	1	-	Unidentified	Medium	Wizard	558	127	48.8	127	48.8	Yes	No	Unidentified	0	Unidentified	0	No	T2_Spiked_After_Box1_Wz		-
2021-07-08	Spiked	After	1	1	-	Natural Material - SPT ppt	Medium	Wizard	559	148.4	49.8	148.4	49.8	Yes	No	unknown ppt 1	76.81	unknown ppt 1	76.81	No	T2_Spiked_After_Box1_Wz		-
2021-07-08	Spiked	After	1	1	-	Natural Material - Crumb Rubber Changed	Medium	Wizard	560	46.8	25.5	46.8	25.5	No	No	CR_sedimentproject*2	80.4	CR_sedimentproject*2	80.4	No	T2_Spiked_After_Box1_Wz	no black particle under point, may just be carbon based natural material	no
2021-07-08	Spiked	After	1	1	-	Natural Material - SPT ppt	Medium	Wizard	561	86.9	39.3	86.9	39.3	No	No	unknown ppt 1	78.84	unknown ppt 1	78.84	No	T2_Spiked_After_Box1_Wz		-
2021-07-08	Spiked	After	1	1	-	Nylon	Large	Wizard	562	690.9	230.5	690.9	230.5	Yes	No	NYLON 100-300 5	92.95	NYLON 100-300 5	92.95	No	T2_Spiked_After_Box1_Wz		yes
2021-07-08	Spiked	After	1	1	-	Natural Material - SPT ppt	Large	Wizard	563	394.9	199.7	394.9	199.7	Yes	No	unknown ppt 1	88.16	unknown ppt 1	88.16	No	T2_Spiked_After_Box1_Wz		-
2021-07-08	Spiked	After	1	1	-	Natural Material - SPT ppt	Medium	Wizard	564	66.8	30.6	66.8	30.6	No	No	unknown ppt 1	84.14	unknown ppt 1	84.14	No	T2_Spiked_After_Box1_Wz		-
2021-07-08	Spiked	After	1	1	-	Unidentified	Medium	Wizard	565	66.8	34	66.8	34	No	No	Unidentified	0	Unidentified	0	No	T2_Spiked_After_Box1_Wz		-
2021-07-08	Spiked	After	1	1	-	Natural Material - SPT ppt	Medium	Wizard	566	60.1	39.7	60.1	39.7	No	No	unknown ppt 1	79.53	unknown ppt 1	79.53	No	T2_Spiked_After_Box1_Wz		-
2021-07-08	Spiked	After	1	1	-	Natural Material - SPT ppt	Medium	Wizard	567	133.6	48.1	133.6	48.1	Yes	No	unknown ppt 1	76.29	unknown ppt 1	76.29	No	T2_Spiked_After_Box1_Wz		-
2021-07-08	Spiked	After	1	1	-	Natural Material - SPT ppt	Medium	Wizard	568	53.5	37.2	53.5	37.2	No	No	unknown ppt 1	78.05	unknown ppt 1	78.05	No	T2_Spiked_After_Box1_Wz		-
2021-07-08	Spiked	After	1	1	-	Natural Material - SPT ppt	Medium	Wizard	569	156	94.8	156	94.8	Yes	No	unknown ppt 1	85.17	unknown ppt 1	85.17	No	T2_Spiked_After_Box1_Wz		-
2021-07-08	Spiked	After	1	1	-	Unidentified	Medium	Wizard	570	207.1	122.4	207.1	122.4	Yes	No	Unidentified	0	Unidentified	0	No	T2_Spiked_After_Box1_Wz		-
2021-07-08	Spiked	After	1	1	-	Natural Material - SPT ppt	Large	Wizard	571	368.5	83.6	368.5	83.6	Yes	No	unknown ppt 1	85.32	unknown ppt 1	85.32	No	T2_Spiked_After_Box1_Wz		-
2021-07-08	Spiked	After	1	1	-	Unidentified	Medium	Wizard	572	77.9	43	77.9	43	No	No	Unidentified	0	Unidentified	0	No	T2_Spiked_After_Box1_Wz		-
2021-07-08	Spiked	After	1	1	-	PP	Large	Wizard	573	510	164.5	210.48	132.05	Yes	No	unknown ppt 1	79.47	pp 300 plus 5	78.32	yes	T2_Spiked_After_Box1_Wz	reanalyzed on the area map and identified as PP	yes
2021-07-08	Spiked	After	1	1	-	Unidentified	Medium	Wizard	574	93.5	43.8	93.5	43.8	No	No	Unidentified	0	Unidentified	0	No	T2_Spiked_After_Box1_Wz		-
2021-07-08	Spiked	After	1	1	-	Natural Material - SPT ppt	Medium	Wizard	575	80.5	55.8	80.5	55.8	No	No	unknown ppt 1	81.76	unknown ppt 1	81.76	No	T2_Spiked_After_Box1_Wz		-
2021-07-08	Spiked	After	1	1	-	Natural Material - SPT ppt	Medium	Wizard	576	114.2	72.2	114.2	72.2	Yes	No	unknown ppt 1	77.5	unknown ppt 1	77.5	No	T2_Spiked_After_Box1_Wz		-
2021-07-08	Spiked	After	1	1	-	Natural Material - SPT ppt	Medium	Wizard	577	90.9	55.7	90.9	55.7	No	No	unknown ppt 1	81.47	unknown ppt 1	81.47	No	T2_Spiked_After_Box1_Wz		-
2021-07-08	Spiked	After	1	1	-	Unidentified	Large	Wizard	578	677.5	84.5	677.5	84.5	Yes	No	Unidentified	0	Unidentified	0	No	T2_Spiked_After_Box1_Wz		-
2021-07-08	Spiked	After	1	1	-	Natural Material - SPT ppt	Medium	Wizard	579	86.9	30.1	86.9	30.1	No	No	unknown ppt 1	81.88	unknown ppt 1	81.88	No	T2_Spiked_After_Box1_Wz		-
2021-07-08	Spiked	After	1	1	-	Natural Material - SPT ppt	Medium	Wizard	580	73.5	41.8	73.5	41.8	No	No	unknown ppt 1	77.45	unknown ppt 1	77.45	No	T2_Spiked_After_Box1_Wz		-
2021-07-08	Spiked	After	1	1	-	PVC	Large	Wizard	581	541.2	250.7	541.2	250.7	Yes	No	PVC300PLUS_4	93.85	PVC300PLUS_4	93.85	No	T2_Spiked_After_Box1_Wz		yes
2021-07-08	Spiked	After	1	1	-	Natural Material - SPT ppt	Medium	Wizard	582	60.1	38.8	60.1	38.8	No	No	unknown ppt 1	78.58	unknown ppt 1	78.58	No	T2_Spiked_After_Box1_Wz		-
2021-07-08	Spiked	After	1	1	-	Natural Material - SPT ppt	Large	Wizard	583	324.4	76.6	324.4	76.6	Yes	No	unknown ppt 1	82.71	unknown ppt 1	82.71	No	T2_Spiked_After_Box1_Wz		-
2021-07-08	Spiked	After	1	1	-	Natural Material - SPT ppt	Large	Wizard	584	354.1	123.9	354.1	123.9	Yes	No	unknown ppt 1	83.69	unknown ppt 1	83.69	No	T2_Spiked_After_Box1_Wz		-
2021-07-08	Spiked	After	1	1	-	Unidentified	Medium	Wizard	585	93.5	21.9	93.5	21.9	No	No	Unidentified	0	Unidentified	0	No	T2_Spiked_After_Box1_Wz		-
2021-07-08	Spiked	After	1	1	-	Natural Material - SPT ppt	Medium	Wizard	586	57.5	31.6	57.5	31.6	No	No	unknown ppt 1	75.11	unknown ppt 1	75.11	No	T2_Spiked_After_Box1_Wz		-
2021-07-08	Spiked	After	1	1	-	Natural Material - SPT ppt	Medium	Wizard	587	46.8	28	46.8	28	No	No	unknown ppt 1	78.61	unknown ppt 1	78.61	No	T2_Spiked_After_Box1_Wz		-
2021-07-08	Spiked	After	1	1	-	Natural Material - SPT ppt	Medium	Wizard	588	77.9	54.7	77.9	54.7	No	No	unknown ppt 1	76.01	unknown ppt 1	76.01	No	T2_Spiked_After_Box1_Wz		-
2021-07-08	Spiked	After	1	1	-	Natural Material - SPT ppt	Medium	Wizard	589	270.6	65.1	270.6	65.1	Yes	No	unknown ppt 1	83.39	unknown ppt 1	83.39	No	T2_Spiked_After_Box1_Wz		-
2021-07-08	Spiked	After	1	1	-	Natural Material - SPT ppt	Medium	Wizard	590	125.5	72	125.5	72	Yes	No	unknown ppt 1	77.32	unknown ppt 1	77.32	No	T2_Spiked_After_Box1_Wz		-
2021-07-08	Spiked	After	1	1	-	Natural Material - SPT ppt	Large	Wizard	591	406.9	117.9	406.9	117.9	Yes	No	unknown ppt 1	78.87	unknown ppt 1	78.87	No	T2_Spiked_After_Box1_Wz		-
2021-07-08	Spiked	After	1	1	-	Natural Material - SPT ppt	Medium	Wizard	592	53.5	14.9	53.5	14.9	No	No	unknown ppt 1	83.52	unknown ppt 1	83.52	No	T2_Spiked_After_Box1_Wz		-
2021-07-08	Spiked	After	1	1	-	Natural Material - SPT ppt	Medium	Wizard	593	53.9	24.3	53.9	24.3	No	No	unknown ppt 1	90.68	unknown ppt 1	90.68	No	T2_Spiked_After_Box1_Wz		-
2021-07-08	Spiked	After	1	1	-	Natural Material - SPT ppt	Medium	Wizard	594	230.8	67.5	230.8	67.5	Yes	No	unknown ppt 1	77.87	unknown ppt 1	77.87	No	T2_Spiked_After_Box1_Wz		-
2021-07-08	Spiked	After	1	1	-	Natural Material - SPT ppt	Medium	Wizard	595	80.2	22	80.2	22	No	No	unknown ppt 1	90.97	unknown ppt 1	90.97	No	T2_Spiked_After_Box1_Wz		-
2021-07-08	Spiked	After	1	1	-	Natural Material - SPT ppt	Medium	Wizard	596	73.5	54.1	73.5	54.1	No	No	unknown ppt 1	76.11	unknown ppt 1	76.11	No	T2_Spiked_After_Box1_Wz		-
2021-07-08	Spiked	After	1	1	-	Natural Material - SPT ppt	Medium	Wizard	597	133.6	74	133.6	74	Yes	No	unknown ppt 1	86.27	unknown ppt 1	86.27	No	T2_Spiked_After_Box1_Wz		-
2021-07-08	Spiked	After	1	1	-	Natural Material - SPT ppt	Medium	Wizard	598	47.2	33.7	47.2	33.7	No	No	unknown ppt 1	85.95	unknown ppt 1	85.95	No	T2_Spiked_After_Box1_Wz		-
2021-07-08	Spiked	After	1	1	-	Natural Material - SPT ppt	Medium	Wizard	599	60.1	22.7	60.1	22.7	No	No	unknown ppt 1	86.94	unknown ppt 1	86.94	No	T2_Spiked_After_Box1_Wz		-
2021-07-08	Spiked	After	1	1	-	Natural Material - SPT ppt	Medium	Wizard	600	46.8	32.8	46.8	32.8	No	No	unknown ppt 1	78.16	unknown ppt 1	78.16	No	T2_Spiked_After_Box1_Wz		-
2021-07-08	Spiked	After	1	1	-	Natural Material - SPT ppt	Medium	Wizard	601	46.8	46.8	46.8	46.8	No	No	unknown ppt 1	77.48	unknown ppt 1	77.48	No	T2_Spiked_After_Box1_Wz		-
2021-07-08	Spiked	After	1	1	-	Unidentified	Medium	Wizard	602	53.9	28.5	53.9	28.5	No	No	Unidentified	0	Unidentified	0	No	T2_Spiked_After_Box1_Wz		-
2021-07-08	Spiked	After	1	1	-	Natural Material - SPT ppt	Medium	Wizard	603	77.9	48.9	77.9	48.9	No	No	unknown ppt 1	84.1	unknown ppt 1	84.1	No	T2_Spiked_After_Box1_Wz		-
2021-07-08	Spiked	After	1	1	-	Natural Material - SPT ppt	Medium	Wizard	604	260.6	65.9	260.6	65.9	Yes	No	unknown ppt 1	89.07	unknown ppt 1	89.07	No	T2_Spiked_After_Box1_Wz		-
2021-07-08	Spiked	After	1	1	-	Unidentified	Medium	Wizard	605	253.9	57.5	253.9	57.5	Yes	No	Unidentified	0	Unidentified	0	No	T2_Spiked_After_Box1_Wz		-
2021-07-08	Spiked	After	1	1	-	Natural Material - SPT ppt	Medium	Wizard	606	53.5	47.9	53.5	47.9	No	No	unknown ppt 1	75.19	unknown ppt 1	75.19	No	T2_Spiked_After_Box1_Wz		-
2021-07-08	Spiked	After	1	1	-	Natural Material - SPT ppt	Medium	Wizard	607	180.4	79.7	180.4	79.7	Yes	No	unknown ppt 1	83.13	unknown ppt 1	83.13	No	T2_Spiked_After_Box1_Wz		-
2021-07-08	Spiked	After	1	1	-	Natural Material - SPT ppt	Medium	Wizard	608	46.8	23.1	46.8	23.1	No	No	unknown ppt 1	75.17	unknown ppt 1	75.17	No	T2_Spiked_After_Box1_Wz		-
2021-07-08	Spiked	After	1	1	-	Natural Material - SPT ppt	Medium	Wizard	609	124.3	65.4	124.3	65.4	Yes	No	unknown ppt 1	83.84	unknown ppt 1	83.84	No	T2_Spiked_After_Box1_Wz		-
2021-07-08	Spiked	After	1	1	-	Natural Material - SPT ppt	Medium	Wizard	610	200.2	56.8	200.2	56.8	Yes	No	unknown ppt 1	76.52	unknown ppt 1	76.52	No	T2_Spiked_After_Box1_Wz		-
2021-07-08	Spiked	After	1	1	-	Unidentified	Medium	Wizard	611	63	32.5	63	32.5	No	No	Unidentified	0	Unidentified	0	No	T2_Spiked_After_Box1_Wz		-
2021-07-08	Spiked	After	1	1	-	Natural Material - SPT ppt	Large	Wizard	612	304.8	126.6	304.8	126.6	Yes	No	unknown ppt 1	86.09	unknown ppt 1	86.09	No	T2_Spiked_After_Box1_Wz		-
2021-07-08	Spiked	After	1	1	-	Natural Material - SPT ppt	Medium	Wizard	613	127	28.7	127	28.7	Yes	No	unknown ppt 1	86.46	unknown ppt 1	86.46	No	T2_Spiked_After_Box1_Wz		-
2021-07-08	Spiked	After	1	1	-	Natural Material - SPT ppt	Medium	Wizard	614	73.5	32.5	73.5	32.5	No	No	unknown ppt 1	83.75	unknown ppt 1	83.75	No	T2_Spiked_After_Box1_Wz		-
2021-07-08	Spiked	After	1	1	-	Natural Material - SPT ppt	Medium	Wizard	615	68.8	56.2	68.8	56.2	No	No	unknown ppt 1	81.6	unknown ppt 1	81.6	No	T2_Spiked_After_Box1_Wz		-
2021-07-08	Spiked	After	1	1	-	Natural Material - SPT ppt	Medium	Wizard	616	46.8	26.7	46.8	26.7	No	No	unknown ppt 1	86.49	unknown ppt 1	86.49	No	T2_Spiked_After_Box1_Wz		-
2021-07-08	Spiked	After	1	1	-	Natural Material - SPT ppt	Medium	Wizard	617	141.6	62.6	141.6	62.6	Yes	No	unknown ppt 1	75.62	unknown ppt 1	75.62	No	T2_Spiked_After_Box1_Wz		-
2021-07-08	Spiked	After	1	1	-	Natural Material - SPT ppt	Medium	Wizard	618	126.1	51.9	126.1	51.9	Yes	No	unknown ppt 1	82.21	unknown ppt 1	82.21	No	T2_Spiked_After_Box1_Wz		-
2021-07-08	Spiked	After	1	1	-	Natural Material - SPT ppt	Medium	Wizard	619	46.8	35.2	46.8	35.2	No	No	unknown ppt 1	86.49	unknown ppt 1	86.49	No	T2_Spiked_After_Box1_Wz		-
2021-07-08	Spiked	After	1	1	-	Unidentified	Medium	Wizard	620	60.1	35.9	60.1	35.9	No	No	Unidentified	0	Unidentified	0	No	T2_Spiked_After_Box1_Wz		-
2021-07-08	Spiked	After	1	1	-	Natural Material - SPT ppt	Medium	Wizard	621	295	74.8	295	74.8	Yes	No	unknown ppt 1	80.04	unknown ppt 1	80.04	No	T2_Spiked_After_Box1_Wz		-
2021-07-08	Spiked	After	1	1	-	Natural Material - SPT ppt	Medium	Wizard	622	60.1	27.4	60.1	27.4	No	No	unknown ppt 1	78.05	unknown ppt 1	78.05	No	T2_Spiked_After_Box1_Wz		-
2021-07-08	Spiked	After	1	1	-	Natural Material - SPT ppt	Medium	Wizard	623	127	86.4	127	86.4	Yes	No	unknown ppt 1	79.7	unknown ppt 1	79.7	No	T2_Spiked_After_Box1_Wz		-
2021-07-08	Spiked	After	1	1	-	Natural Material - SPT ppt	Medium	Wizard	624	156.4	65.4	156.4	65.4	Yes	No	unknown ppt 1	77.75	unknown ppt 1	77.75	No	T2_Spiked_After_Box1_Wz		-
2021-07-08	Spiked	After	1	1	-	Natural Material - SPT ppt	Medium	Wizard	625	93.5	64.4	93.5	64.4	No	No	unknown ppt 1	80.6	unknown ppt 1	80.6	No	T2_Spiked_After_Box1_Wz		-
2021-07-08	Spiked	After	1	1	-	Unidentified	Medium	Wizard	626	182.4	67.3	182.4	67.3	Yes	No	Unidentified	0	Unidentified	0	No	T2_Spiked_After_Box1_Wz		-
2021-07-08	Spiked	After	1	1	-	Unidentified	Medium	Wizard	627	80.2	36.2	80.2	36.2	No	No	Unidentified	0	Unidentified	0	No	T2_Spiked_After_Box1_Wz		-
2021-07-08	Spiked	After	1	1	-	Unidentified	Medium	Wizard	628	113.8	38	113.8	38	Yes	No	Unidentified	0	Unidentified	0	No	T2_Spiked_After_Box1_Wz		-
2021-07-08	Spiked	After	1	1	-	Natural Material - SPT ppt	Medium	Wizard	629	73.5	48.7	73.5	48.7	No	No	unknown ppt 1	80.98	unknown ppt 1	80.98	No	T2_Spiked_After_Box1_Wz		-
2021-07-08	Spiked	After	1	1	-	Natural Material - SPT ppt	Large	Wizard	630	546.8	240.1	546.8	240.1	Yes	No	unknown ppt 1	85.48	unknown ppt 1	85.48	No	T2_Spiked_After_Box1_Wz		-
2021-07-08	Spiked	After	1	1	-	Natural Material - SPT ppt	Medium	Wizard	631	127	83.7	127	83.7	Yes	No	unknown ppt 1	81.21	unknown ppt 1	81.21	No	T2_Spiked_After_Box1_Wz		-
2021-07-08	Spiked	After	1	1	-	Natural Material - SPT ppt	Medium	Wizard	632	153.7	51	153.7	51	Yes	No	unknown ppt 1	78.27	unknown ppt 1	78.27	No	T2_Spiked_After_Box1_Wz		-
2021-07-08	Spiked	After	1	1	-	Unidentified	Medium	Wizard	633	187.1	40.4	187.1	40.4	Yes	No	Unidentified	0	Unidentified	0	No	T2_Spiked_After_Box1_Wz		-
2021-07-08	Spiked	After	1	1	-	Unidentified	Medium	Wizard	634	160.4	73.4	160.4	73.4	Yes	No	Unidentified	0	Unidentified	0	No	T2_Spiked_After_Box1_Wz		-
2021-07-08	Spiked	After	1	1	-	Natural Material - SPT ppt	Medium	Wizard	635	46.8	19.4	46.8	19.4	No	No	unknown ppt 1	77.62	unknown ppt 1	77.62	No	T2_Spiked_After_Box1_Wz		-
2021-07-08	Spiked	After	1	1	-	Natural Material - SPT ppt	Medium	Wizard	636	46.8	15.8	46.8	15.8	No	No	unknown ppt 1	77.92	unknown ppt 1	77.92	No	T2_Spiked_After_Box1_Wz		-
2021-07-08	Spiked	After	1	1	-	Natural Material - SPT ppt	Medium	Wizard	637	124.3	49.4	124.3	49.4	Yes	No	unknown ppt 1	84.29	unknown ppt 1	84.29	No	T2_Spiked_After_Box1_Wz		-
2021-07-08	Spiked	After	1	1	-	Natural Material - SPT ppt	Medium	Wizard	638	276.6	97	276.6	97	Yes	No	unknown ppt 1	85.28	unknown ppt 1	85.28	No	T2_Spiked_After_Box1_Wz		-
2021-07-08	Spiked	After	1	1	-	Natural Material - SPT ppt	Medium	Wizard	639	46.8	14.6	46.8	14.6	No	No	unknown ppt 1	83.23	unknown ppt 1	83.23	No	T2_Spiked_After_Box1_Wz		-
2021-07-08	Spiked	After	1	1	-	Natural Material - SPT ppt	Medium	Wizard	640	46.8	25.5	46.8	25.5	No	No	unknown ppt 1	86.99	unknown ppt 1	86.99	No	T2_Spiked_After_Box1_Wz		-
2021-07-08	Spiked	After	1	1	-	Natural Material - SPT ppt	Medium	Wizard	641	73.5	32.5	73.5	32.5	No	No	unknown ppt 1	82.46	unknown ppt 1	82.46	No	T2_Spiked_After_Box1_Wz		-
2021-07-08	Spiked	After	1	1	-	Unidentified	Medium	Wizard	642	146.5	34.1	146.5	34.1	Yes	No	Unidentified	0	Unidentified	0	No	T2_Spiked_After_Box1_Wz		-
2021-07-08	Spiked	After	1	1	-	Natural Material - SPT ppt	Medium	Wizard	643	86.9	38.6	86.9	38.6	No	No	unknown ppt 1	79.8	unknown ppt 1	79.8	No	T2_Spiked_After_Box1_Wz		-
2021-07-08	Spiked	After	1	1	-	Natural Material - SPT ppt	Medium	Wizard	644	80.7	45.8	80.7	45.8	No	No	unknown ppt 1	85.53	unknown ppt 1	85.53	No	T2_Spiked_After_Box1_Wz		-
2021-07-08	Spiked	After	1	1	-	Natural Material - SPT ppt	Medium	Wizard	645	86.9	38.6	86.9	38.6	No	No	unknown ppt 1	85.41	unknown ppt 1	85.41	No	T2_Spiked_After_Box1_Wz		-
2021-07-08	Spiked	After	1	1	-	Unidentified	Medium	Wizard	646	93.5	48	93.5	48	No	No	Unidentified	0	Unidentified	0	No	T2_Spiked_After_Box1_Wz		-
2021-07-08	Spiked	After	1	1	-	PVC	Large	Wizard	647	8662.3	1406.4	1829	979	Yes	No			PVC300PLUS_4	99.33	yes	T2_Spiked_After_Box1_Wz		yes
2021-07-08	Spiked	After	1	1	-	Natural Material - SPT ppt	Medium	Wizard	648	53.9	36.9	53.9	36.9	No	No	unknown ppt 1	75.99	unknown ppt 1	75.99	No	T2_Spiked_After_Box1_Wz		-
2021-07-08	Spiked	After	1	1	-	Natural Material - SPT ppt	Medium	Wizard	649	46.8	40.1	46.8	40.1	No	No	unknown ppt 1	85.23	unknown ppt 1	85.23	No	T2_Spiked_After_Box1_Wz		-
2021-07-08	Spiked	After	1	1	-	Natural Material - SPT ppt	Medium	Wizard	650	46.8	29.2	46.8	29.2	No	No	unknown ppt 1	75.2	unknown ppt 1	75.2	No	T2_Spiked_After_Box1_Wz		-
2021-07-08	Spiked	After	1	1	-	Natural Material - SPT ppt	Medium	Wizard	651	53.5	33	53.5	33	No	No	unknown ppt 1	81.92	unknown ppt 1	81.92	No	T2_Spiked_After_Box1_Wz		-
2021-07-08	Spiked	After	1	1	-	Unidentified	Medium	Wizard	652	46.8	38.9	46.8	38.9	No	No	Unidentified	0	Unidentified	0	No	T2_Spiked_After_Box1_Wz		-
2021-07-08	Spiked	After	1	1	-	Natural Material - SPT ppt	Medium	Wizard	653	106.9	70.2	106.9	70.2	Yes	No	unknown ppt 1	78.25	unknown ppt 1	78.25	No	T2_Spiked_After_Box1_Wz		-
2021-07-08	Spiked	After	1	1	-	Unidentified	Medium	Wizard	654	66.8	38.3	66.8	38.3	No	No	Unidentified	0	Unidentified	0	No	T2_Spiked_After_Box1_Wz		-
2021-07-08	Spiked	After	1	1	-	Unidentified	Medium	Wizard	655	52.2	39.2	52.2	39.2	No	No	Unidentified	0	Unidentified	0	No	T2_Spiked_After_Box1_Wz		-
2021-07-08	Spiked	After	1	1	-	Natural Material - SPT ppt	Medium	Wizard	656	100.2	48.2	100.2	48.2	Yes	No	unknown ppt 1	79.4	unknown ppt 1	79.4	No	T2_Spiked_After_Box1_Wz		-
2021-07-08	Spiked	After	1	1	-	Natural Material - SPT ppt	Medium	Wizard	657	66.8	51.9	66.8	51.9	No	No	unknown ppt 1	78.79	unknown ppt 1	78.79	No	T2_Spiked_After_Box1_Wz		-
2021-07-08	Spiked	After	1	1	-	Unidentified	Medium	Wizard	658	120.5	49.6	120.5	49.6	Yes	No	Unidentified	0	Unidentified	0	No	T2_Spiked_After_Box1_Wz		-
2021-07-08	Spiked	After	1	1	-	Unidentified	Medium	Wizard	659	93.5	43.8	93.5	43.8	No	No	Unidentified	0	Unidentified	0	No	T2_Spiked_After_Box1_Wz		-
2021-07-08	Spiked	After	1	1	-	Unidentified	Medium	Wizard	660	86.9	47.8	86.9	47.8	No	No	Unidentified	0	Unidentified	0	No	T2_Spiked_After_Box1_Wz		-
2021-07-08	Spiked	After	1	1	-	Natural Material - SPT ppt	Medium	Wizard	661	107.9	30.5	107.9	30.5	Yes	No	unknown ppt 1	76.04	unknown ppt 1	76.04	No	T2_Spiked_After_Box1_Wz		-
2021-07-08	Spiked	After	1	1	-	Unidentified	Medium	Wizard	662	106.9	55.3	106.9	55.3	Yes	No	Unidentified	0	Unidentified	0	No	T2_Spiked_After_Box1_Wz		-
2021-07-08	Spiked	After	1	1	-	Natural Material - SPT ppt	Medium	Wizard	663	73.5	65.7	73.5	65.7	No	No	unknown ppt 1	89.77	unknown ppt 1	89.77	No	T2_Spiked_After_Box1_Wz		-
2021-07-08	Spiked	After	1	1	-	Natural Material - SPT ppt	Medium	Wizard	664	60.1	46.3	60.1	46.3	No	No	unknown ppt 1	87.84	unknown ppt 1	87.84	No	T2_Spiked_After_Box1_Wz		-
2021-07-08	Spiked	After	1	1	-	Unidentified	Medium	Wizard	665	71	45.6	71	45.6	No	No	Unidentified	0	Unidentified	0	No	T2_Spiked_After_Box1_Wz		-
2021-07-08	Spiked	After	1	1	-	Unidentified	Medium	Wizard	666	53.5	39.3	53.5	39.3	No	No	Unidentified	0	Unidentified	0	No	T2_Spiked_After_Box1_Wz		-
2021-07-08	Spiked	After	1	1	-	Unidentified	Medium	Wizard	667	85.6	53.1	85.6	53.1	No	No	Unidentified	0	Unidentified	0	No	T2_Spiked_After_Box1_Wz		-
2021-07-08	Spiked	After	1	1	-	Unidentified	Medium	Wizard	668	203.2	90.6	203.2	90.6	Yes	No	Unidentified	0	Unidentified	0	No	T2_Spiked_After_Box1_Wz		-
2021-07-08	Spiked	After	1	1	-	Unidentified	Medium	Wizard	669	46.8	37.7	46.8	37.7	No	No	Unidentified	0	Unidentified	0	No	T2_Spiked_After_Box1_Wz		-
2021-07-08	Spiked	After	1	1	-	Unidentified	Medium	Wizard	670	60.1	47.3	60.1	47.3	No	No	Unidentified	0	Unidentified	0	No	T2_Spiked_After_Box1_Wz		-
2021-07-08	Spiked	After	1	1	-	Natural Material - SPT ppt	Medium	Wizard	671	80.7	54.9	80.7	54.9	No	No	unknownppt 4	83.74	unknownppt 4	83.74	No	T2_Spiked_After_Box1_Wz		-
2021-07-08	Spiked	After	1	1	-	Natural Material - SPT ppt	Medium	Wizard	672	46.8	20.7	46.8	20.7	No	No	unknown ppt 1	83.62	unknown ppt 1	83.62	No	T2_Spiked_After_Box1_Wz		-
2021-07-08	Spiked	After	1	1	-	Natural Material - SPT ppt	Medium	Wizard	673	83.7	44.8	83.7	44.8	No	No	unknown ppt 1	85.62	unknown ppt 1	85.62	No	T2_Spiked_After_Box1_Wz		-
2021-07-08	Spiked	After	1	1	-	Unidentified	Medium	Wizard	674	83.7	46.8	83.7	46.8	No	No	Unidentified	0	Unidentified	0	No	T2_Spiked_After_Box1_Wz		-
2021-07-08	Spiked	After	1	1	-	Natural Material - SPT ppt	Medium	Wizard	675	52.2	30.5	52.2	30.5	No	No	unknown ppt 1	84.22	unknown ppt 1	84.22	No	T2_Spiked_After_Box1_Wz		-
2021-07-08	Spiked	After	1	1	-	Natural Material - SPT ppt	Medium	Wizard	676	167.4	48.9	167.4	48.9	Yes	No	unknown ppt 1	75.06	unknown ppt 1	75.06	No	T2_Spiked_After_Box1_Wz		-
2021-07-08	Spiked	After	1	1	-	Natural Material - SPT ppt	Large	Wizard	677	1236.1	430.6	1236.1	430.6	Yes	No	unknown ppt 1	76.09	unknown ppt 1	76.09	No	T2_Spiked_After_Box1_Wz		-
2021-07-08	Spiked	After	1	1	-	Natural Material - SPT ppt	Medium	Wizard	678	57.5	29.7	57.5	29.7	No	No	unknown ppt 1	82.54	unknown ppt 1	82.54	No	T2_Spiked_After_Box1_Wz		-
2021-07-08	Spiked	After	1	1	-	Natural Material - SPT ppt	Medium	Wizard	679	53.9	45.4	53.9	45.4	No	No	unknown ppt 1	80.38	unknown ppt 1	80.38	No	T2_Spiked_After_Box1_Wz		-
2021-07-08	Spiked	After	1	1	-	Natural Material - SPT ppt	Medium	Wizard	680	53.5	41.5	53.5	41.5	No	No	unknown ppt 1	75.03	unknown ppt 1	75.03	No	T2_Spiked_After_Box1_Wz		-
2021-07-08	Spiked	After	1	1	-	Natural Material - Crumb Rubber Changed	Medium	Wizard	681	137.7	33.4	137.7	33.4	Yes	No	CR300PLUS_7	77.77	CR300PLUS_7	77.77	No	T2_Spiked_After_Box1_Wz	no black particle under point, may just be carbon based natural material	no
2021-07-08	Spiked	After	1	1	-	Unidentified	Medium	Wizard	682	160.6	55.2	160.6	55.2	Yes	No	Unidentified	0	Unidentified	0	No	T2_Spiked_After_Box1_Wz		-
2021-07-08	Spiked	After	1	1	-	Unidentified	Medium	Wizard	683	46.8	17	46.8	17	No	No	Unidentified	0	Unidentified	0	No	T2_Spiked_After_Box1_Wz		-
2021-07-08	Spiked	After	1	1	-	Unidentified	Medium	Wizard	684	46.8	25.5	46.8	25.5	No	No	Unidentified	0	Unidentified	0	No	T2_Spiked_After_Box1_Wz		-
2021-07-08	Spiked	After	1	1	-	Unidentified	Medium	Wizard	685	60.1	30.2	60.1	30.2	No	No	Unidentified	0	Unidentified	0	No	T2_Spiked_After_Box1_Wz		-
2021-07-08	Spiked	After	1	1	-	Natural Material - Crumb Rubber Changed	Medium	Wizard	686	120.3	41.6	120.3	41.6	Yes	No	CRUMBRUBBER300PLUS_1	75.19	CRUMBRUBBER300PLUS_1	75.19	No	T2_Spiked_After_Box1_Wz	no black particle under point, may just be carbon based natural material	no
2021-07-08	Spiked	After	1	1	-	Natural Material - SPT ppt	Medium	Wizard	687	75.6	31.6	75.6	31.6	No	No	unknown ppt 1	77.1	unknown ppt 1	77.1	No	T2_Spiked_After_Box1_Wz		-
2021-07-08	Spiked	After	1	1	-	Unidentified	Medium	Wizard	688	86.9	55.6	86.9	55.6	No	No	Unidentified	0	Unidentified	0	No	T2_Spiked_After_Box1_Wz		-
2021-07-08	Spiked	After	1	1	-	Unidentified	Medium	Wizard	689	53.9	28.5	53.9	28.5	No	No	Unidentified	0	Unidentified	0	No	T2_Spiked_After_Box1_Wz		-
2021-07-08	Spiked	After	1	1	-	Unidentified	Medium	Wizard	690	83.7	29.9	83.7	29.9	No	No	Unidentified	0	Unidentified	0	No	T2_Spiked_After_Box1_Wz		-
2021-07-08	Spiked	After	1	1	-	Unidentified	Medium	Wizard	691	80.2	40.4	80.2	40.4	No	No	Unidentified	0	Unidentified	0	No	T2_Spiked_After_Box1_Wz		-
2021-07-08	Spiked	After	1	1	-	Unidentified	Medium	Wizard	692	85.6	46.5	85.6	46.5	No	No	Unidentified	0	Unidentified	0	No	T2_Spiked_After_Box1_Wz		-
2021-07-08	Spiked	After	1	1	-	Unidentified	Medium	Wizard	693	113.6	46	113.6	46	Yes	No	Unidentified	0	Unidentified	0	No	T2_Spiked_After_Box1_Wz		-
2021-07-08	Spiked	After	1	1	-	Unidentified	Medium	Wizard	694	106.9	68.1	106.9	68.1	Yes	No	Unidentified	0	Unidentified	0	No	T2_Spiked_After_Box1_Wz		-
2021-07-08	Spiked	After	1	1	-	Natural Material - SPT ppt	Medium	Wizard	695	74.7	29.7	74.7	29.7	No	No	unknown ppt 1	80.99	unknown ppt 1	80.99	No	T2_Spiked_After_Box1_Wz		-
2021-07-08	Spiked	After	1	1	-	Natural Material - SPT ppt	Medium	Wizard	696	126.1	72.1	126.1	72.1	Yes	No	unknown ppt 1	77.65	unknown ppt 1	77.65	No	T2_Spiked_After_Box1_Wz		-
2021-07-08	Spiked	After	1	1	-	Unidentified	Medium	Wizard	697	77.9	32.1	77.9	32.1	No	No	Unidentified	0	Unidentified	0	No	T2_Spiked_After_Box1_Wz		-
2021-07-08	Spiked	After	1	1	-	Unidentified	Medium	Wizard	698	60.1	31.2	60.1	31.2	No	No	Unidentified	0	Unidentified	0	No	T2_Spiked_After_Box1_Wz		-
2021-07-08	Spiked	After	1	1	-	Natural Material - SPT ppt	Medium	Wizard	699	107.7	38	107.7	38	Yes	No	unknown ppt 1	79.57	unknown ppt 1	79.57	No	T2_Spiked_After_Box1_Wz		-
2021-07-08	Spiked	After	1	1	-	Natural Material - SPT ppt	Medium	Wizard	700	53.9	34.8	53.9	34.8	No	No	unknown ppt 1	78.4	unknown ppt 1	78.4	No	T2_Spiked_After_Box1_Wz		-
2021-07-08	Spiked	After	1	1	-	Natural Material - SPT ppt	Medium	Wizard	701	66.8	14.5	66.8	14.5	No	No	unknown ppt 1	84.77	unknown ppt 1	84.77	No	T2_Spiked_After_Box1_Wz		-
2021-07-08	Spiked	After	1	1	-	Natural Material - SPT ppt	Medium	Wizard	702	66.8	45.1	66.8	45.1	No	No	unknown ppt 1	77.04	unknown ppt 1	77.04	No	T2_Spiked_After_Box1_Wz		-
2021-07-08	Spiked	After	1	1	-	Natural Material - SPT ppt	Medium	Wizard	703	228.1	91.7	228.1	91.7	Yes	No	unknown ppt 1	76.44	unknown ppt 1	76.44	No	T2_Spiked_After_Box1_Wz		-
2021-07-08	Spiked	After	1	1	-	Natural Material - SPT ppt	Medium	Wizard	704	85.6	40.5	85.6	40.5	No	No	unknown ppt 1	76.35	unknown ppt 1	76.35	No	T2_Spiked_After_Box1_Wz		-
2021-07-08	Spiked	After	1	1	-	Natural Material - SPT ppt	Medium	Wizard	705	60.1	42.5	60.1	42.5	No	No	unknown ppt 1	77.13	unknown ppt 1	77.13	No	T2_Spiked_After_Box1_Wz		-
2021-07-08	Spiked	After	1	1	-	Natural Material - SPT ppt	Medium	Wizard	706	53.5	24.5	53.5	24.5	No	No	unknown ppt 1	86.83	unknown ppt 1	86.83	No	T2_Spiked_After_Box1_Wz		-
2021-07-08	Spiked	After	1	1	-	Natural Material - SPT ppt	Large	Wizard	707	446.9	118.4	446.9	118.4	Yes	No	unknown ppt 1	87.68	unknown ppt 1	87.68	No	T2_Spiked_After_Box1_Wz		-
2021-07-08	Spiked	After	1	1	-	Natural Material - SPT ppt	Medium	Wizard	708	86.9	23.6	86.9	23.6	No	No	unknown ppt 1	82.23	unknown ppt 1	82.23	No	T2_Spiked_After_Box1_Wz		-
2021-07-08	Spiked	After	1	1	-	Natural Material - SPT ppt	Medium	Wizard	709	66.8	28.1	66.8	28.1	No	No	unknown ppt 1	80.39	unknown ppt 1	80.39	No	T2_Spiked_After_Box1_Wz		-
2021-07-08	Spiked	After	1	1	-	Unidentified	Medium	Wizard	710	86.9	72	86.9	72	No	No	Unidentified	0	Unidentified	0	No	T2_Spiked_After_Box1_Wz		-
2021-07-08	Spiked	After	1	1	-	Natural Material - SPT ppt	Medium	Wizard	711	100.2	56.7	100.2	56.7	Yes	No	unknown ppt 1	75.67	unknown ppt 1	75.67	No	T2_Spiked_After_Box1_Wz		-
2021-07-08	Spiked	After	1	1	-	Natural Material - SPT ppt	Medium	Wizard	712	66.8	34.9	66.8	34.9	No	No	unknown ppt 1	84.61	unknown ppt 1	84.61	No	T2_Spiked_After_Box1_Wz		-
2021-07-08	Spiked	After	1	1	-	Natural Material - SPT ppt	Medium	Wizard	713	76.2	27.6	76.2	27.6	No	No	unknown ppt 1	85.34	unknown ppt 1	85.34	No	T2_Spiked_After_Box1_Wz		-
2021-07-08	Spiked	After	1	1	-	Natural Material - SPT ppt	Medium	Wizard	714	129.7	73.6	129.7	73.6	Yes	No	unknown ppt 1	77.58	unknown ppt 1	77.58	No	T2_Spiked_After_Box1_Wz		-
2021-07-08	Spiked	After	1	1	-	Natural Material - SPT ppt	Medium	Wizard	715	60.1	28.4	60.1	28.4	No	No	unknown ppt 1	81.91	unknown ppt 1	81.91	No	T2_Spiked_After_Box1_Wz		-
2021-07-08	Spiked	After	1	1	-	Unidentified	Medium	Wizard	716	53.5	29.8	53.5	29.8	No	No	Unidentified	0	Unidentified	0	No	T2_Spiked_After_Box1_Wz		-
2021-07-08	Spiked	After	1	1	-	Unidentified	Medium	Wizard	717	52.2	35.9	52.2	35.9	No	No	Unidentified	0	Unidentified	0	No	T2_Spiked_After_Box1_Wz		-
2021-07-08	Spiked	After	1	1	-	Natural Material - SPT ppt	Medium	Wizard	718	46.8	42.5	46.8	42.5	No	No	unknown ppt 1	80.01	unknown ppt 1	80.01	No	T2_Spiked_After_Box1_Wz		-
2021-07-08	Spiked	After	1	1	-	Unidentified	Medium	Wizard	719	73.5	32.5	73.5	32.5	No	No	Unidentified	0	Unidentified	0	No	T2_Spiked_After_Box1_Wz		-
2021-07-08	Spiked	After	1	1	-	Unidentified	Medium	Wizard	720	73.5	17	73.5	17	No	No	Unidentified	0	Unidentified	0	No	T2_Spiked_After_Box1_Wz		-
2021-07-08	Spiked	After	1	1	-	Unidentified	Medium	Wizard	721	68.8	43	68.8	43	No	No	Unidentified	0	Unidentified	0	No	T2_Spiked_After_Box1_Wz		-
2021-07-08	Spiked	After	1	1	-	Natural Material - SPT ppt	Medium	Wizard	722	46.8	29.2	46.8	29.2	No	No	unknown ppt 1	78.74	unknown ppt 1	78.74	No	T2_Spiked_After_Box1_Wz		-
2021-07-08	Spiked	After	1	1	-	Natural Material - SPT ppt	Medium	Wizard	723	200.5	89	200.5	89	Yes	No	unknown ppt 1	77.54	unknown ppt 1	77.54	No	T2_Spiked_After_Box1_Wz		-
2021-07-08	Spiked	After	1	1	-	Unidentified	Medium	Wizard	724	80.2	24.8	80.2	24.8	No	No	Unidentified	0	Unidentified	0	No	T2_Spiked_After_Box1_Wz		-
2021-07-08	Spiked	After	1	1	-	Unidentified	Medium	Wizard	725	68.8	28.1	68.8	28.1	No	No	Unidentified	0	Unidentified	0	No	T2_Spiked_After_Box1_Wz		-
2021-07-08	Spiked	After	1	1	-	Natural Material - SPT ppt	Medium	Wizard	726	53.5	36.2	53.5	36.2	No	No	unknown ppt 1	82.79	unknown ppt 1	82.79	No	T2_Spiked_After_Box1_Wz		-
2021-07-08	Spiked	After	1	1	-	Natural Material - SPT ppt	Medium	Wizard	727	85.6	27.9	85.6	27.9	No	No	unknown ppt 1	79.42	unknown ppt 1	79.42	No	T2_Spiked_After_Box1_Wz		-
2021-07-08	Spiked	After	1	1	-	Natural Material - SPT ppt	Medium	Wizard	728	66.8	28.1	66.8	28.1	No	No	unknown ppt 1	77.91	unknown ppt 1	77.91	No	T2_Spiked_After_Box1_Wz		-
2021-07-08	Spiked	After	1	1	-	Natural Material - SPT ppt	Medium	Wizard	729	53.5	41.5	53.5	41.5	No	No	unknown ppt 1	83.14	unknown ppt 1	83.14	No	T2_Spiked_After_Box1_Wz		-
2021-07-08	Spiked	After	1	1	-	Unidentified	Medium	Wizard	730	106.9	39.3	106.9	39.3	Yes	No	Unidentified	0	Unidentified	0	No	T2_Spiked_After_Box1_Wz		-
2021-07-08	Spiked	After	1	1	-	Unidentified	Medium	Wizard	731	127	63.6	127	63.6	Yes	No	Unidentified	0	Unidentified	0	No	T2_Spiked_After_Box1_Wz		-
2021-07-08	Spiked	After	1	1	-	Natural Material - SPT ppt	Medium	Wizard	732	171.3	50.8	171.3	50.8	Yes	No	unknown ppt 1	84.09	unknown ppt 1	84.09	No	T2_Spiked_After_Box1_Wz		-
2021-07-08	Spiked	After	1	1	-	Natural Material - SPT ppt	Medium	Wizard	733	147	61.5	147	61.5	Yes	No	unknown ppt 1	84.15	unknown ppt 1	84.15	No	T2_Spiked_After_Box1_Wz		-
2021-07-08	Spiked	After	1	1	-	Natural Material - SPT ppt	Medium	Wizard	734	100.2	46.5	100.2	46.5	Yes	No	unknown ppt 1	82.33	unknown ppt 1	82.33	No	T2_Spiked_After_Box1_Wz		-
2021-07-08	Spiked	After	1	1	-	Natural Material - SPT ppt	Large	Wizard	735	327.4	123.3	327.4	123.3	Yes	No	unknown ppt 1	85.18	unknown ppt 1	85.18	No	T2_Spiked_After_Box1_Wz		-
2021-07-08	Spiked	After	1	1	-	Unidentified	Medium	Wizard	736	127	38.1	127	38.1	Yes	No	Unidentified	0	Unidentified	0	No	T2_Spiked_After_Box1_Wz		-
2021-07-08	Spiked	After	1	1	-	Natural Material - SPT ppt	Medium	Wizard	737	46.8	35.2	46.8	35.2	No	No	unknown ppt 1	81.29	unknown ppt 1	81.29	No	T2_Spiked_After_Box1_Wz		-
2021-07-08	Spiked	After	1	1	-	Unidentified	Medium	Wizard	738	106.9	39.3	106.9	39.3	Yes	No	Unidentified	0	Unidentified	0	No	T2_Spiked_After_Box1_Wz		-
2021-07-08	Spiked	After	1	1	-	Unidentified	Medium	Wizard	739	140.3	41.3	140.3	41.3	Yes	No	Unidentified	0	Unidentified	0	No	T2_Spiked_After_Box1_Wz		-
2021-07-08	Spiked	After	1	1	-	Unidentified	Large	Wizard	740	732.4	74.6	732.4	74.6	Yes	No	Unidentified	0	Unidentified	0	No	T2_Spiked_After_Box1_Wz		-
2021-07-08	Spiked	After	1	1	-	Natural Material - SPT ppt	Medium	Wizard	741	48.2	37.8	48.2	37.8	No	No	unknown ppt 1	86.63	unknown ppt 1	86.63	No	T2_Spiked_After_Box1_Wz		-
2021-07-08	Spiked	After	1	1	-	Natural Material - SPT ppt	Large	Wizard	742	414.9	101.5	414.9	101.5	Yes	No	unknown ppt 1	80.06	unknown ppt 1	80.06	No	T2_Spiked_After_Box1_Wz		-
2021-07-08	Spiked	After	1	1	-	Natural Material - SPT ppt	Medium	Wizard	743	114.2	45.3	114.2	45.3	Yes	No	unknown ppt 1	77.47	unknown ppt 1	77.47	No	T2_Spiked_After_Box1_Wz		-
2021-07-08	Spiked	After	1	1	-	Unidentified	Medium	Wizard	744	60.1	23.6	60.1	23.6	No	No	Unidentified	0	Unidentified	0	No	T2_Spiked_After_Box1_Wz		-
2021-07-08	Spiked	After	1	1	-	Natural Material - SPT ppt	Medium	Wizard	745	100.2	68.1	100.2	68.1	Yes	No	unknown ppt 1	84.72	unknown ppt 1	84.72	No	T2_Spiked_After_Box1_Wz		-
2021-07-08	Spiked	After	1	1	-	Unidentified	Medium	Wizard	746	73.5	27.8	73.5	27.8	No	No	Unidentified	0	Unidentified	0	No	T2_Spiked_After_Box1_Wz		-
2021-07-08	Spiked	After	1	1	-	Natural Material - SPT ppt	Medium	Wizard	747	48.2	36.6	48.2	36.6	No	No	unknown ppt 1	80.11	unknown ppt 1	80.11	No	T2_Spiked_After_Box1_Wz		-
2021-07-08	Spiked	After	1	1	-	Natural Material - SPT ppt	Medium	Wizard	748	46.8	24.3	46.8	24.3	No	No	unknown ppt 1	85.71	unknown ppt 1	85.71	No	T2_Spiked_After_Box1_Wz		-
2021-07-08	Spiked	After	1	1	-	Natural Material - SPT ppt	Medium	Wizard	749	60.1	31.2	60.1	31.2	No	No	unknown ppt 1	83.54	unknown ppt 1	83.54	No	T2_Spiked_After_Box1_Wz		-
2021-07-08	Spiked	After	1	1	-	Natural Material - SPT ppt	Medium	Wizard	750	53.9	24.3	53.9	24.3	No	No	unknown ppt 1	85.46	unknown ppt 1	85.46	No	T2_Spiked_After_Box1_Wz		-
2021-07-08	Spiked	After	1	1	-	Natural Material - SPT ppt	Medium	Wizard	751	227.2	78.3	227.2	78.3	Yes	No	unknown ppt 1	77.53	unknown ppt 1	77.53	No	T2_Spiked_After_Box1_Wz		-
2021-07-08	Spiked	After	1	1	-	Unidentified	Medium	Wizard	752	100.2	42.5	100.2	42.5	Yes	No	Unidentified	0	Unidentified	0	No	T2_Spiked_After_Box1_Wz		-
2021-07-08	Spiked	After	1	1	-	Unidentified	Medium	Wizard	753	66.8	39.1	66.8	39.1	No	No	Unidentified	0	Unidentified	0	No	T2_Spiked_After_Box1_Wz		-
2021-07-08	Spiked	After	1	1	-	Unidentified	Medium	Wizard	754	150.2	66.3	150.2	66.3	Yes	No	Unidentified	0	Unidentified	0	No	T2_Spiked_After_Box1_Wz		-
2021-07-08	Spiked	After	1	1	-	Natural Material - SPT ppt	Medium	Wizard	755	86.9	50.4	86.9	50.4	No	No	unknown ppt 1	79.7	unknown ppt 1	79.7	No	T2_Spiked_After_Box1_Wz		-
2021-07-08	Spiked	After	1	1	-	Natural Material - SPT ppt	Medium	Wizard	756	170.7	40	170.7	40	Yes	No	unknown ppt 1	76.85	unknown ppt 1	76.85	No	T2_Spiked_After_Box1_Wz		-
2021-07-08	Spiked	After	1	1	-	Natural Material - SPT ppt	Large	Wizard	757	317.7	179.3	317.7	179.3	Yes	No	unknown ppt 1	84.8	unknown ppt 1	84.8	No	T2_Spiked_After_Box1_Wz		-
2021-07-08	Spiked	After	1	1	-	Natural Material - SPT ppt	Large	Wizard	758	585.8	241.6	585.8	241.6	Yes	No	unknown ppt 1	75.84	unknown ppt 1	75.84	No	T2_Spiked_After_Box1_Wz		-
2021-07-08	Spiked	After	1	1	-	Unidentified	Medium	Wizard	759	63	40.6	63	40.6	No	No	Unidentified	0	Unidentified	0	No	T2_Spiked_After_Box1_Wz		-
2021-07-08	Spiked	After	1	1	-	Natural Material - SPT ppt	Medium	Wizard	760	66.8	25.5	66.8	25.5	No	No	unknown ppt 1	76.36	unknown ppt 1	76.36	No	T2_Spiked_After_Box1_Wz		-
2021-07-08	Spiked	After	1	1	-	Unidentified	Medium	Wizard	761	73.5	37.1	73.5	37.1	No	No	Unidentified	0	Unidentified	0	No	T2_Spiked_After_Box1_Wz		-
2021-07-08	Spiked	After	1	1	-	Natural Material - SPT ppt	Medium	Wizard	762	46.8	18.2	46.8	18.2	No	No	unknown ppt 1	83.64	unknown ppt 1	83.64	No	T2_Spiked_After_Box1_Wz		-
2021-07-08	Spiked	After	1	1	-	Unidentified	Medium	Wizard	763	100.2	28.9	100.2	28.9	Yes	No	Unidentified	0	Unidentified	0	No	T2_Spiked_After_Box1_Wz		-
2021-07-08	Spiked	After	1	1	-	Natural Material - SPT ppt	Medium	Wizard	764	106.9	69.7	106.9	69.7	Yes	No	unknown ppt 1	79.39	unknown ppt 1	79.39	No	T2_Spiked_After_Box1_Wz		-
2021-07-08	Spiked	After	1	1	-	Natural Material - SPT ppt	Medium	Wizard	765	143	88.3	143	88.3	Yes	No	unknown ppt 1	77.45	unknown ppt 1	77.45	No	T2_Spiked_After_Box1_Wz		-
2021-07-08	Spiked	After	1	1	-	Natural Material - SPT ppt	Medium	Wizard	766	93.5	32.2	93.5	32.2	No	No	unknown ppt 1	80.79	unknown ppt 1	80.79	No	T2_Spiked_After_Box1_Wz		-
2021-07-08	Spiked	After	1	1	-	Natural Material - SPT ppt	Medium	Wizard	767	235	77.9	235	77.9	Yes	No	unknown ppt 1	82.05	unknown ppt 1	82.05	No	T2_Spiked_After_Box1_Wz		-
2021-07-08	Spiked	After	1	1	-	Unidentified	Medium	Wizard	768	60.1	42.5	60.1	42.5	No	No	Unidentified	0	Unidentified	0	No	T2_Spiked_After_Box1_Wz		-
2021-07-08	Spiked	After	1	1	-	Natural Material - SPT ppt	Medium	Wizard	769	104.4	41.4	104.4	41.4	Yes	No	unknown ppt 1	82.09	unknown ppt 1	82.09	No	T2_Spiked_After_Box1_Wz		-
2021-07-08	Spiked	After	1	1	-	Natural Material - SPT ppt	Medium	Wizard	770	47.2	38.5	47.2	38.5	No	No	unknown ppt 1	83.89	unknown ppt 1	83.89	No	T2_Spiked_After_Box1_Wz		-
2021-07-08	Spiked	After	1	1	-	Unidentified	Medium	Wizard	771	80.2	54.6	80.2	54.6	No	No	Unidentified	0	Unidentified	0	No	T2_Spiked_After_Box1_Wz		-
2021-07-08	Spiked	After	1	1	-	Natural Material - SPT ppt	Medium	Wizard	772	127	78.8	127	78.8	Yes	No	unknown ppt 1	78.89	unknown ppt 1	78.89	No	T2_Spiked_After_Box1_Wz		-
2021-07-08	Spiked	After	1	1	-	Natural Material - SPT ppt	Medium	Wizard	773	53.5	29.8	53.5	29.8	No	No	unknown ppt 1	79.42	unknown ppt 1	79.42	No	T2_Spiked_After_Box1_Wz		-
2021-07-08	Spiked	After	1	1	-	Unidentified	Medium	Wizard	774	46.8	19.4	46.8	19.4	No	No	Unidentified	0	Unidentified	0	No	T2_Spiked_After_Box1_Wz		-
2021-07-08	Spiked	After	1	1	-	Natural Material - SPT ppt	Medium	Wizard	775	66.8	48.5	66.8	48.5	No	No	unknown ppt 1	77.62	unknown ppt 1	77.62	No	T2_Spiked_After_Box1_Wz		-
2021-07-08	Spiked	After	1	1	-	Natural Material - SPT ppt	Medium	Wizard	776	133.6	42.5	133.6	42.5	Yes	No	unknown ppt 1	77.31	unknown ppt 1	77.31	No	T2_Spiked_After_Box1_Wz		-
2021-07-08	Spiked	After	1	1	-	Unidentified	Medium	Wizard	777	107.9	38.4	107.9	38.4	Yes	No	Unidentified	0	Unidentified	0	No	T2_Spiked_After_Box1_Wz		-
2021-07-08	Spiked	After	1	1	-	Natural Material - SPT ppt	Medium	Wizard	778	140.3	81	140.3	81	Yes	No	unknown ppt 1	80.42	unknown ppt 1	80.42	No	T2_Spiked_After_Box1_Wz		-
2021-07-08	Spiked	After	1	1	-	Unidentified	Medium	Wizard	779	113.6	80.6	113.6	80.6	Yes	No	Unidentified	0	Unidentified	0	No	T2_Spiked_After_Box1_Wz		-
2021-07-08	Spiked	After	1	1	-	Natural Material - SPT ppt	Medium	Wizard	780	233.9	77.5	233.9	77.5	Yes	No	unknown ppt 1	79.01	unknown ppt 1	79.01	No	T2_Spiked_After_Box1_Wz		-
2021-07-08	Spiked	After	1	1	-	Natural Material - SPT ppt	Medium	Wizard	781	107.9	57.4	107.9	57.4	Yes	No	unknown ppt 1	77.83	unknown ppt 1	77.83	No	T2_Spiked_After_Box1_Wz		-
2021-07-08	Spiked	After	1	1	-	Natural Material - SPT ppt	Medium	Wizard	782	274	106.9	274	106.9	Yes	No	unknown ppt 1	76.42	unknown ppt 1	76.42	No	T2_Spiked_After_Box1_Wz		-
2021-07-08	Spiked	After	1	1	-	Natural Material - SPT ppt	Medium	Wizard	783	242.2	40.6	242.2	40.6	Yes	No	unknown ppt 1	78.65	unknown ppt 1	78.65	No	T2_Spiked_After_Box1_Wz		-
2021-07-08	Spiked	After	1	1	-	Natural Material - SPT ppt	Medium	Wizard	784	46.8	29.2	46.8	29.2	No	No	unknown ppt 1	77.23	unknown ppt 1	77.23	No	T2_Spiked_After_Box1_Wz		-
2021-07-08	Spiked	After	1	1	-	Natural Material - SPT ppt	Medium	Wizard	785	53.5	29.8	53.5	29.8	No	No	unknown ppt 1	84.82	unknown ppt 1	84.82	No	T2_Spiked_After_Box1_Wz		-
2021-07-08	Spiked	After	1	1	-	Natural Material - SPT ppt	Medium	Wizard	786	60.1	40.6	60.1	40.6	No	No	unknown ppt 1	79.44	unknown ppt 1	79.44	No	T2_Spiked_After_Box1_Wz		-
2021-07-08	Spiked	After	1	1	-	Unidentified	Medium	Wizard	787	53.5	28.7	53.5	28.7	No	No	Unidentified	0	Unidentified	0	No	T2_Spiked_After_Box1_Wz		-
2021-07-08	Spiked	After	1	1	-	Unidentified	Medium	Wizard	788	80.2	39	80.2	39	No	No	Unidentified	0	Unidentified	0	No	T2_Spiked_After_Box1_Wz		-
2021-07-08	Spiked	After	1	1	-	Natural Material - SPT ppt	Medium	Wizard	789	46.8	29.2	46.8	29.2	No	No	unknown ppt 1	82.64	unknown ppt 1	82.64	No	T2_Spiked_After_Box1_Wz		-
2021-07-08	Spiked	After	1	1	-	Natural Material - SPT ppt	Medium	Wizard	790	63	40.6	63	40.6	No	No	unknown ppt 1	82.66	unknown ppt 1	82.66	No	T2_Spiked_After_Box1_Wz		-
2021-07-08	Spiked	After	1	1	-	Natural Material - SPT ppt	Medium	Wizard	791	80.2	42.5	80.2	42.5	No	No	unknown ppt 1	76.06	unknown ppt 1	76.06	No	T2_Spiked_After_Box1_Wz		-
2021-07-08	Spiked	After	1	1	-	Natural Material - SPT ppt	Medium	Wizard	792	146.5	71	146.5	71	Yes	No	unknown ppt 1	82.92	unknown ppt 1	82.92	No	T2_Spiked_After_Box1_Wz		-
2021-07-08	Spiked	After	1	1	-	Unidentified	Medium	Wizard	793	80.5	39.6	80.5	39.6	No	No	Unidentified	0	Unidentified	0	No	T2_Spiked_After_Box1_Wz		-
2021-07-08	Spiked	After	1	1	-	Natural Material - SPT ppt	Medium	Wizard	794	106.9	43.1	106.9	43.1	Yes	No	unknown ppt 1	82.15	unknown ppt 1	82.15	No	T2_Spiked_After_Box1_Wz		-
2021-07-08	Spiked	After	1	1	-	Natural Material - SPT ppt	Medium	Wizard	795	269.4	99.6	269.4	99.6	Yes	No	unknown ppt 1	85.54	unknown ppt 1	85.54	No	T2_Spiked_After_Box1_Wz		-
2021-07-08	Spiked	After	1	1	-	Natural Material - SPT ppt	Medium	Wizard	796	60.1	50.1	60.1	50.1	No	No	unknown ppt 1	76.56	unknown ppt 1	76.56	No	T2_Spiked_After_Box1_Wz		-
2021-07-08	Spiked	After	1	1	-	Natural Material - SPT ppt	Medium	Wizard	797	105.6	61.3	105.6	61.3	Yes	No	unknown ppt 1	75.08	unknown ppt 1	75.08	No	T2_Spiked_After_Box1_Wz		-
2021-07-08	Spiked	After	1	1	-	Natural Material - SPT ppt	Medium	Wizard	798	46.8	25.5	46.8	25.5	No	No	unknown ppt 1	85.39	unknown ppt 1	85.39	No	T2_Spiked_After_Box1_Wz		-
2021-07-08	Spiked	After	1	1	-	Unidentified	Medium	Wizard	799	46.8	29.2	46.8	29.2	No	No	Unidentified	0	Unidentified	0	No	T2_Spiked_After_Box1_Wz		-
2021-07-08	Spiked	After	1	1	-	PVC	Large	Wizard	800	4622.8	1220.7	1590	1159	Yes	No	PVC300PLUS_4	93.36	PVC300PLUS_4	93.36	yes	T2_Spiked_After_Box1_Wz		yes
2021-07-08	Spiked	After	1	1	-	Unidentified	Medium	Wizard	801	46.8	23.1	46.8	23.1	No	No	Unidentified	0	Unidentified	0	No	T2_Spiked_After_Box1_Wz		-
2021-07-08	Spiked	After	1	1	-	Natural Material - SPT ppt	Medium	Wizard	802	52.2	29.4	52.2	29.4	No	No	unknown ppt 1	79.64	unknown ppt 1	79.64	No	T2_Spiked_After_Box1_Wz		-
2021-07-08	Spiked	After	1	1	-	Unidentified	Medium	Wizard	803	48.2	30.7	48.2	30.7	No	No	Unidentified	0	Unidentified	0	No	T2_Spiked_After_Box1_Wz		-
2021-07-08	Spiked	After	1	1	-	Natural Material - SPT ppt	Medium	Wizard	804	287.3	65.5	287.3	65.5	Yes	No	unknown ppt 1	78.55	unknown ppt 1	78.55	No	T2_Spiked_After_Box1_Wz		-
2021-07-08	Spiked	After	1	1	-	Natural Material - SPT ppt	Medium	Wizard	805	60.1	32.1	60.1	32.1	No	No	unknown ppt 1	81.31	unknown ppt 1	81.31	No	T2_Spiked_After_Box1_Wz		-
2021-07-08	Spiked	After	1	1	-	Natural Material - SPT ppt	Medium	Wizard	806	66.8	27.2	66.8	27.2	No	No	unknown ppt 1	82.39	unknown ppt 1	82.39	No	T2_Spiked_After_Box1_Wz		-
2021-07-08	Spiked	After	1	1	-	Unidentified	Medium	Wizard	807	60.1	18.9	60.1	18.9	No	No	Unidentified	0	Unidentified	0	No	T2_Spiked_After_Box1_Wz		-
2021-07-08	Spiked	After	1	1	-	Natural Material - SPT ppt	Medium	Wizard	808	100.2	60.1	100.2	60.1	Yes	No	unknown ppt 1	78.93	unknown ppt 1	78.93	No	T2_Spiked_After_Box1_Wz		-
2021-07-08	Spiked	After	1	1	-	Natural Material - SPT ppt	Medium	Wizard	809	104.6	38	104.6	38	Yes	No	unknown ppt 1	82.75	unknown ppt 1	82.75	No	T2_Spiked_After_Box1_Wz		-
2021-07-08	Spiked	After	1	1	-	Unidentified	Medium	Wizard	810	93.5	43.8	93.5	43.8	No	No	Unidentified	0	Unidentified	0	No	T2_Spiked_After_Box1_Wz		-
2021-07-08	Spiked	After	1	1	-	Natural Material - SPT ppt	Medium	Wizard	811	165	64.4	165	64.4	Yes	No	unknown ppt 1	80.03	unknown ppt 1	80.03	No	T2_Spiked_After_Box1_Wz		-
2021-07-08	Spiked	After	1	1	-	Natural Material - SPT ppt	Medium	Wizard	812	227.2	135.9	227.2	135.9	Yes	No	unknown ppt 1	88.65	unknown ppt 1	88.65	No	T2_Spiked_After_Box1_Wz		-
2021-07-08	Spiked	After	1	1	-	Unidentified	Medium	Wizard	813	80.2	35.4	80.2	35.4	No	No	Unidentified	0	Unidentified	0	No	T2_Spiked_After_Box1_Wz		-
2021-07-08	Spiked	After	1	1	-	Natural Material - SPT ppt	Medium	Wizard	814	53.9	36.9	53.9	36.9	No	No	unknown ppt 1	76.89	unknown ppt 1	76.89	No	T2_Spiked_After_Box1_Wz		-
2021-07-08	Spiked	After	1	1	-	Natural Material - SPT ppt	Medium	Wizard	815	133.6	33.6	133.6	33.6	Yes	No	unknown ppt 1	80.34	unknown ppt 1	80.34	No	T2_Spiked_After_Box1_Wz		-
2021-07-08	Spiked	After	1	1	-	Natural Material - SPT ppt	Medium	Wizard	816	66.8	34.9	66.8	34.9	No	No	unknown ppt 1	80.74	unknown ppt 1	80.74	No	T2_Spiked_After_Box1_Wz		-
2021-07-08	Spiked	After	1	1	-	Natural Material - SPT ppt	Medium	Wizard	817	120.3	31.2	120.3	31.2	Yes	No	unknown ppt 1	76.28	unknown ppt 1	76.28	No	T2_Spiked_After_Box1_Wz		-
2021-07-08	Spiked	After	1	1	-	Natural Material - SPT ppt	Medium	Wizard	818	63	49.6	63	49.6	No	No	unknown ppt 1	84.16	unknown ppt 1	84.16	No	T2_Spiked_After_Box1_Wz		-
2021-07-08	Spiked	After	1	1	-	Natural Material - SPT ppt	Medium	Wizard	819	83.7	61.1	83.7	61.1	No	No	unknown ppt 1	83.37	unknown ppt 1	83.37	No	T2_Spiked_After_Box1_Wz		-
2021-07-08	Spiked	After	1	1	-	Unidentified	Medium	Wizard	820	46.8	20.7	46.8	20.7	No	No	Unidentified	0	Unidentified	0	No	T2_Spiked_After_Box1_Wz		-
2021-07-08	Spiked	After	1	1	-	Natural Material - SPT ppt	Medium	Wizard	821	68.8	37.2	68.8	37.2	No	No	unknown ppt 1	76.07	unknown ppt 1	76.07	No	T2_Spiked_After_Box1_Wz		-
2021-07-08	Spiked	After	1	1	-	Natural Material - SPT ppt	Medium	Wizard	822	204	85	204	85	Yes	No	unknown ppt 1	75.79	unknown ppt 1	75.79	No	T2_Spiked_After_Box1_Wz		-
2021-07-08	Spiked	After	1	1	-	Natural Material - SPT ppt	Large	Wizard	823	319.4	131.3	319.4	131.3	Yes	No	unknown ppt 1	84.39	unknown ppt 1	84.39	No	T2_Spiked_After_Box1_Wz		-
2021-07-08	Spiked	After	1	1	-	Natural Material - SPT ppt	Medium	Wizard	824	46.8	36.5	46.8	36.5	No	No	unknown ppt 1	76.1	unknown ppt 1	76.1	No	T2_Spiked_After_Box1_Wz		-
2021-07-08	Spiked	After	1	1	-	Unidentified	Medium	Wizard	825	52.2	40.3	52.2	40.3	No	No	Unidentified	0	Unidentified	0	No	T2_Spiked_After_Box1_Wz		-
2021-07-08	Spiked	After	1	1	-	Unidentified	Medium	Wizard	826	106.9	38.3	106.9	38.3	Yes	No	Unidentified	0	Unidentified	0	No	T2_Spiked_After_Box1_Wz		-
2021-07-08	Spiked	After	1	1	-	Natural Material - SPT ppt	Medium	Wizard	827	95.7	33.3	95.7	33.3	No	No	unknown ppt 1	77.2	unknown ppt 1	77.2	No	T2_Spiked_After_Box1_Wz		-
2021-07-08	Spiked	After	1	1	-	Natural Material - SPT ppt	Medium	Wizard	828	133.6	56.2	133.6	56.2	Yes	No	unknown ppt 1	76.95	unknown ppt 1	76.95	No	T2_Spiked_After_Box1_Wz		-
2021-07-08	Spiked	After	1	1	-	Natural Material - SPT ppt	Medium	Wizard	829	133.6	42.1	133.6	42.1	Yes	No	unknown ppt 1	76.39	unknown ppt 1	76.39	No	T2_Spiked_After_Box1_Wz		-
2021-07-08	Spiked	After	1	1	-	Unidentified	Medium	Wizard	830	66.8	42.5	66.8	42.5	No	No	Unidentified	0	Unidentified	0	No	T2_Spiked_After_Box1_Wz		-
2021-07-08	Spiked	After	1	1	-	Unidentified	Medium	Wizard	831	46.8	32.8	46.8	32.8	No	No	Unidentified	0	Unidentified	0	No	T2_Spiked_After_Box1_Wz		-
2021-07-08	Spiked	After	1	1	-	Natural Material - SPT ppt	Medium	Wizard	832	154.3	77	154.3	77	Yes	No	unknown ppt 1	86.83	unknown ppt 1	86.83	No	T2_Spiked_After_Box1_Wz		-
2021-07-08	Spiked	After	1	1	-	Unidentified	Medium	Wizard	833	100.2	39.7	100.2	39.7	Yes	No	Unidentified	0	Unidentified	0	No	T2_Spiked_After_Box1_Wz		-
2021-07-08	Spiked	After	1	1	-	Natural Material - SPT ppt	Medium	Wizard	834	60.1	38.8	60.1	38.8	No	No	unknown ppt 1	81.37	unknown ppt 1	81.37	No	T2_Spiked_After_Box1_Wz		-
2021-07-08	Spiked	After	1	1	-	Natural Material - SPT ppt	Medium	Wizard	835	133.6	28.9	133.6	28.9	Yes	No	unknown ppt 1	83.16	unknown ppt 1	83.16	No	T2_Spiked_After_Box1_Wz		-
2021-07-08	Spiked	After	1	1	-	Natural Material - SPT ppt	Large	Wizard	836	314	123.5	314	123.5	Yes	No	unknown ppt 1	90.6	unknown ppt 1	90.6	No	T2_Spiked_After_Box1_Wz		-
2021-07-08	Spiked	After	1	1	-	Unidentified	Medium	Wizard	837	140.3	85.9	140.3	85.9	Yes	No	Unidentified	0	Unidentified	0	No	T2_Spiked_After_Box1_Wz		-
2021-07-08	Spiked	After	1	1	-	Unidentified	Medium	Wizard	838	73.5	37.9	73.5	37.9	No	No	Unidentified	0	Unidentified	0	No	T2_Spiked_After_Box1_Wz		-
2021-07-08	Spiked	After	1	1	-	Unidentified	Medium	Wizard	839	73.5	44.1	73.5	44.1	No	No	Unidentified	0	Unidentified	0	No	T2_Spiked_After_Box1_Wz		-
2021-07-08	Spiked	After	1	1	-	Natural Material - SPT ppt	Medium	Wizard	840	80.2	30.5	80.2	30.5	No	No	unknown ppt 1	77.09	unknown ppt 1	77.09	No	T2_Spiked_After_Box1_Wz		-
2021-07-08	Spiked	After	1	1	-	Unidentified	Medium	Wizard	841	72.3	46.4	72.3	46.4	No	No	Unidentified	0	Unidentified	0	No	T2_Spiked_After_Box1_Wz		-
2021-07-08	Spiked	After	1	1	-	Natural Material - SPT ppt	Medium	Wizard	842	48.2	31.9	48.2	31.9	No	No	unknown ppt 1	87.09	unknown ppt 1	87.09	No	T2_Spiked_After_Box1_Wz		-
2021-07-08	Spiked	After	1	1	-	Unidentified	Medium	Wizard	843	46.8	35.2	46.8	35.2	No	No	Unidentified	0	Unidentified	0	No	T2_Spiked_After_Box1_Wz		-
2021-07-08	Spiked	After	1	1	-	Natural Material - SPT ppt	Medium	Wizard	844	231.7	97.2	231.7	97.2	Yes	No	unknown ppt 1	87.09	unknown ppt 1	87.09	No	T2_Spiked_After_Box1_Wz		-
2021-07-08	Spiked	After	1	1	-	Natural Material - SPT ppt	Medium	Wizard	845	147	51.4	147	51.4	Yes	No	unknown ppt 1	76.68	unknown ppt 1	76.68	No	T2_Spiked_After_Box1_Wz		-
2021-07-08	Spiked	After	1	1	-	Natural Material - SPT ppt	Medium	Wizard	846	268.9	51.2	268.9	51.2	Yes	No	unknown ppt 1	81.21	unknown ppt 1	81.21	No	T2_Spiked_After_Box1_Wz		-
2021-07-08	Spiked	After	1	1	-	Natural Material - SPT ppt	Medium	Wizard	847	113.6	57.6	113.6	57.6	Yes	No	unknown ppt 1	82.23	unknown ppt 1	82.23	No	T2_Spiked_After_Box1_Wz		-
2021-07-08	Spiked	After	1	1	-	Unidentified	Medium	Wizard	848	73.5	17.8	73.5	17.8	No	No	Unidentified	0	Unidentified	0	No	T2_Spiked_After_Box1_Wz		-
2021-07-08	Spiked	After	1	1	-	Unidentified	Medium	Wizard	849	53.5	34	53.5	34	No	No	Unidentified	0	Unidentified	0	No	T2_Spiked_After_Box1_Wz		-
2021-07-08	Spiked	After	1	1	-	Natural Material - SPT ppt	Medium	Wizard	850	152.5	62.2	152.5	62.2	Yes	No	unknown ppt 1	78.58	unknown ppt 1	78.58	No	T2_Spiked_After_Box1_Wz		-
2021-07-08	Spiked	After	1	1	-	Natural Material - SPT ppt	Medium	Wizard	851	57.5	40.5	57.5	40.5	No	No	unknown ppt 1	77.45	unknown ppt 1	77.45	No	T2_Spiked_After_Box1_Wz		-
2021-07-08	Spiked	After	1	1	-	Unidentified	Medium	Wizard	852	165.4	38.1	165.4	38.1	Yes	No	Unidentified	0	Unidentified	0	No	T2_Spiked_After_Box1_Wz		-
2021-07-08	Spiked	After	1	1	-	Natural Material - SPT ppt	Medium	Wizard	853	46.8	36.5	46.8	36.5	No	No	unknown ppt 1	82.13	unknown ppt 1	82.13	No	T2_Spiked_After_Box1_Wz		-
2021-07-08	Spiked	After	1	1	-	Natural Material - SPT ppt	Medium	Wizard	854	122.8	52.3	122.8	52.3	Yes	No	unknown ppt 1	82.78	unknown ppt 1	82.78	No	T2_Spiked_After_Box1_Wz		-
2021-07-08	Spiked	After	1	1	-	Natural Material - SPT ppt	Medium	Wizard	855	46.8	31.6	46.8	31.6	No	No	unknown ppt 1	79.72	unknown ppt 1	79.72	No	T2_Spiked_After_Box1_Wz		-
2021-07-08	Spiked	After	1	1	-	Unidentified	Medium	Wizard	856	115	57.4	115	57.4	Yes	No	Unidentified	0	Unidentified	0	No	T2_Spiked_After_Box1_Wz		-
2021-07-08	Spiked	After	1	1	-	Natural Material - SPT ppt	Medium	Wizard	857	73.5	48.7	73.5	48.7	No	No	unknown ppt 1	80.99	unknown ppt 1	80.99	No	T2_Spiked_After_Box1_Wz		-
2021-07-08	Spiked	After	1	1	-	Natural Material - SPT ppt	Medium	Wizard	858	140.3	67.3	140.3	67.3	Yes	No	unknown ppt 1	83.13	unknown ppt 1	83.13	No	T2_Spiked_After_Box1_Wz		-
2021-07-08	Spiked	After	1	1	-	Unidentified	Medium	Wizard	859	80.2	30.5	80.2	30.5	No	No	Unidentified	0	Unidentified	0	No	T2_Spiked_After_Box1_Wz		-
2021-07-08	Spiked	After	1	1	-	Natural Material - SPT ppt	Medium	Wizard	860	241.4	57.7	241.4	57.7	Yes	No	unknown ppt 1	77.51	unknown ppt 1	77.51	No	T2_Spiked_After_Box1_Wz		-
2021-07-08	Spiked	After	1	1	-	Unidentified	Medium	Wizard	861	46.8	41.3	46.8	41.3	No	No	Unidentified	0	Unidentified	0	No	T2_Spiked_After_Box1_Wz		-
2021-07-08	Spiked	After	1	1	-	Unidentified	Medium	Wizard	862	193.8	59	193.8	59	Yes	No	Unidentified	0	Unidentified	0	No	T2_Spiked_After_Box1_Wz		-
2021-07-08	Spiked	After	1	1	-	Natural Material - SPT ppt	Large	Wizard	863	736.1	307.2	736.1	307.2	Yes	No	unknown ppt 1	87.31	unknown ppt 1	87.31	No	T2_Spiked_After_Box1_Wz		-
2021-07-08	Spiked	After	1	1	-	Natural Material - SPT ppt	Medium	Wizard	864	236.1	76.1	236.1	76.1	Yes	No	unknown ppt 1	76.67	unknown ppt 1	76.67	No	T2_Spiked_After_Box1_Wz		-
2021-07-08	Spiked	After	1	1	-	Natural Material - SPT ppt	Medium	Wizard	865	63	38.8	63	38.8	No	No	unknown ppt 1	77.34	unknown ppt 1	77.34	No	T2_Spiked_After_Box1_Wz		-
2021-07-08	Spiked	After	1	1	-	Natural Material - SPT ppt	Large	Wizard	866	533.3	119.3	533.3	119.3	Yes	No	unknown ppt 1	81.63	unknown ppt 1	81.63	No	T2_Spiked_After_Box1_Wz		-
2021-07-08	Spiked	After	1	1	-	Natural Material - SPT ppt	Medium	Wizard	867	86.9	41.2	86.9	41.2	No	No	unknown ppt 1	76.34	unknown ppt 1	76.34	No	T2_Spiked_After_Box1_Wz		-
2021-07-08	Spiked	After	1	1	-	Unidentified	Medium	Wizard	868	109.6	52.9	109.6	52.9	Yes	No	Unidentified	0	Unidentified	0	No	T2_Spiked_After_Box1_Wz		-
2021-07-08	Spiked	After	1	1	-	Unidentified	Medium	Wizard	869	191.5	65.9	191.5	65.9	Yes	No	Unidentified	0	Unidentified	0	No	T2_Spiked_After_Box1_Wz		-
2021-07-08	Spiked	After	1	1	-	Natural Material - SPT ppt	Medium	Wizard	870	80.2	41.8	80.2	41.8	No	No	unknown ppt 1	86.9	unknown ppt 1	86.9	No	T2_Spiked_After_Box1_Wz		-
2021-07-08	Spiked	After	1	1	-	Natural Material - SPT ppt	Medium	Wizard	871	180.4	57	180.4	57	Yes	No	unknown ppt 1	76.99	unknown ppt 1	76.99	No	T2_Spiked_After_Box1_Wz		-
2021-07-08	Spiked	After	1	1	-	Natural Material - SPT ppt	Medium	Wizard	872	66.8	44.2	66.8	44.2	No	No	unknown ppt 1	84.98	unknown ppt 1	84.98	No	T2_Spiked_After_Box1_Wz		-
2021-07-08	Spiked	After	1	1	-	Natural Material - SPT ppt	Large	Wizard	873	321.4	92.9	321.4	92.9	Yes	No	unknown ppt 1	75.56	unknown ppt 1	75.56	No	T2_Spiked_After_Box1_Wz		-
2021-07-08	Spiked	After	1	1	-	Unidentified	Medium	Wizard	874	200.5	68.3	200.5	68.3	Yes	No	Unidentified	0	Unidentified	0	No	T2_Spiked_After_Box1_Wz		-
2021-07-08	Spiked	After	1	1	-	Natural Material - SPT ppt	Large	Wizard	875	456	187.9	456	187.9	Yes	No	unknown ppt 1	82.31	unknown ppt 1	82.31	No	T2_Spiked_After_Box1_Wz		-
2021-07-08	Spiked	After	1	1	-	Natural Material - Crumb Rubber Changed	Medium	Wizard	876	86.9	49.7	86.9	49.7	No	No	CR300PLUS_7	75.02	CR300PLUS_7	75.02	No	T2_Spiked_After_Box1_Wz	no black particle under point, may just be carbon based natural material	no
2021-07-08	Spiked	After	1	1	-	Natural Material - SPT ppt	Large	Wizard	877	521.2	165.2	521.2	165.2	Yes	No	unknown ppt 1	76.81	unknown ppt 1	76.81	No	T2_Spiked_After_Box1_Wz		-
2021-07-08	Spiked	After	1	1	-	Unidentified	Medium	Wizard	878	48.2	37.8	48.2	37.8	No	No	Unidentified	0	Unidentified	0	No	T2_Spiked_After_Box1_Wz		-
2021-07-08	Spiked	After	1	1	-	Unidentified	Medium	Wizard	879	127	66.7	127	66.7	Yes	No	Unidentified	0	Unidentified	0	No	T2_Spiked_After_Box1_Wz		-
2021-07-08	Spiked	After	1	1	-	Unidentified	Large	Wizard	880	365.6	94.9	365.6	94.9	Yes	No	Unidentified	0	Unidentified	0	No	T2_Spiked_After_Box1_Wz		-
2021-07-08	Spiked	After	1	1	-	Unidentified	Medium	Wizard	881	113.6	38	113.6	38	Yes	No	Unidentified	0	Unidentified	0	No	T2_Spiked_After_Box1_Wz		-
2021-07-08	Spiked	After	1	1	-	Natural Material - SPT ppt	Medium	Wizard	882	46.8	30.4	46.8	30.4	No	No	unknown ppt 1	82.78	unknown ppt 1	82.78	No	T2_Spiked_After_Box1_Wz		-
2021-07-08	Spiked	After	1	1	-	Unidentified	Medium	Wizard	883	61.6	28.6	61.6	28.6	No	No	Unidentified	0	Unidentified	0	No	T2_Spiked_After_Box1_Wz		-
2021-07-08	Spiked	After	1	1	-	Natural Material - Crumb Rubber Changed	Medium	Wizard	884	53.5	29.8	53.5	29.8	No	No	CR300PLUS_7	75.79	CR300PLUS_7	75.79	No	T2_Spiked_After_Box1_Wz	no black particle under point, may just be carbon based natural material	no
2021-07-08	Spiked	After	1	1	-	Unidentified	Medium	Wizard	885	46.8	25.5	46.8	25.5	No	No	Unidentified	0	Unidentified	0	No	T2_Spiked_After_Box1_Wz		-
2021-07-08	Spiked	After	1	1	-	Unidentified	Medium	Wizard	886	100.2	53.9	100.2	53.9	Yes	No	Unidentified	0	Unidentified	0	No	T2_Spiked_After_Box1_Wz		-
2021-07-08	Spiked	After	1	1	-	Unidentified	Medium	Wizard	887	153.8	48	153.8	48	Yes	No	Unidentified	0	Unidentified	0	No	T2_Spiked_After_Box1_Wz		-
2021-07-08	Spiked	After	1	1	-	Natural Material - SPT ppt	Medium	Wizard	888	66.8	38.3	66.8	38.3	No	No	unknown ppt 1	78.93	unknown ppt 1	78.93	No	T2_Spiked_After_Box1_Wz		-
2021-07-08	Spiked	After	1	1	-	Unidentified	Medium	Wizard	889	48.2	37.8	48.2	37.8	No	No	Unidentified	0	Unidentified	0	No	T2_Spiked_After_Box1_Wz		-
2021-07-08	Spiked	After	1	1	-	Unidentified	Medium	Wizard	890	60.1	39.7	60.1	39.7	No	No	Unidentified	0	Unidentified	0	No	T2_Spiked_After_Box1_Wz		-
2021-07-08	Spiked	After	1	1	-	Unidentified	Medium	Wizard	891	182.4	52.1	182.4	52.1	Yes	No	Unidentified	0	Unidentified	0	No	T2_Spiked_After_Box1_Wz		-
2021-07-08	Spiked	After	1	1	-	Natural Material - SPT ppt	Medium	Wizard	892	66.8	51.9	66.8	51.9	No	No	unknown ppt 1	76.12	unknown ppt 1	76.12	No	T2_Spiked_After_Box1_Wz		-
2021-07-08	Spiked	After	1	1	-	Natural Material - SPT ppt	Medium	Wizard	893	46.8	26.7	46.8	26.7	No	No	unknown ppt 1	75.62	unknown ppt 1	75.62	No	T2_Spiked_After_Box1_Wz		-
2021-07-08	Spiked	After	1	1	-	Unidentified	Medium	Wizard	894	146.7	69.8	146.7	69.8	Yes	No	Unidentified	0	Unidentified	0	No	T2_Spiked_After_Box1_Wz		-
2021-07-08	Spiked	After	1	1	-	Unidentified	Medium	Wizard	895	60.1	24.6	60.1	24.6	No	No	Unidentified	0	Unidentified	0	No	T2_Spiked_After_Box1_Wz		-
2021-07-08	Spiked	After	1	1	-	CR	Medium	Wizard	896	53.5	29.8	53.5	29.8	No	No	CR300PLUS_7	76.21	CR300PLUS_7	76.21	No	T2_Spiked_After_Box1_Wz	very small fragment, not sure if it was a spiked in piece or a broken off piece	yes
2021-07-08	Spiked	After	1	1	-	Natural Material - Crumb Rubber Changed	Medium	Wizard	897	68.8	29.7	68.8	29.7	No	No	CR300PLUS_7	75.32	CR300PLUS_7	75.32	No	T2_Spiked_After_Box1_Wz	no black particle under point, may just be carbon based natural material	no
2021-07-08	Spiked	After	1	1	-	Natural Material - Crumb Rubber Changed	Medium	Wizard	898	53.5	29.8	53.5	29.8	No	No	CRUMBRUBBER300PLUS_1	76.31	CRUMBRUBBER300PLUS_1	76.31	No	T2_Spiked_After_Box1_Wz	no black particle under point, may just be carbon based natural material	no
2021-07-08	Spiked	After	1	1	-	Unidentified	Medium	Wizard	899	46.8	23.1	46.8	23.1	No	No	Unidentified	0	Unidentified	0	No	T2_Spiked_After_Box1_Wz		-
2021-07-08	Spiked	After	1	1	-	Natural Material - SPT ppt	Medium	Wizard	900	283.6	140.3	283.6	140.3	Yes	No	unknown ppt 1	86.36	unknown ppt 1	86.36	No	T2_Spiked_After_Box1_Wz		-
2021-07-08	Spiked	After	1	1	-	Natural Material - SPT ppt	Medium	Wizard	901	60.1	29.3	60.1	29.3	No	No	unknown ppt 1	90.8	unknown ppt 1	90.8	No	T2_Spiked_After_Box1_Wz		-
2021-07-08	Spiked	After	1	1	-	Natural Material - SPT ppt	Medium	Wizard	902	116.9	44.3	116.9	44.3	Yes	No	unknown ppt 1	79.98	unknown ppt 1	79.98	No	T2_Spiked_After_Box1_Wz		-
2021-07-08	Spiked	After	1	1	-	Natural Material - SPT ppt	Medium	Wizard	903	83.7	43.5	83.7	43.5	No	No	unknown ppt 1	78.63	unknown ppt 1	78.63	No	T2_Spiked_After_Box1_Wz		-
2021-07-08	Spiked	After	1	1	-	Unidentified	Medium	Wizard	904	60.1	44.4	60.1	44.4	No	No	Unidentified	0	Unidentified	0	No	T2_Spiked_After_Box1_Wz		-
2021-07-08	Spiked	After	1	1	-	Natural Material - SPT ppt	Medium	Wizard	905	46.8	37.7	46.8	37.7	No	No	unknown ppt 1	79.9	unknown ppt 1	79.9	No	T2_Spiked_After_Box1_Wz		-
2021-07-08	Spiked	After	1	1	-	Natural Material - SPT ppt	Medium	Wizard	906	272.7	125.7	272.7	125.7	Yes	No	unknown ppt 1	81.48	unknown ppt 1	81.48	No	T2_Spiked_After_Box1_Wz		-
2021-07-08	Spiked	After	1	1	-	Natural Material - SPT ppt	Medium	Wizard	907	46.8	19.4	46.8	19.4	No	No	unknown ppt 1	76.09	unknown ppt 1	76.09	No	T2_Spiked_After_Box1_Wz		-
2021-07-08	Spiked	After	1	1	-	Unidentified	Medium	Wizard	908	227.2	60.1	227.2	60.1	Yes	No	Unidentified	0	Unidentified	0	No	T2_Spiked_After_Box1_Wz		-
2021-07-08	Spiked	After	1	1	-	Unidentified	Medium	Wizard	909	73.5	27.8	73.5	27.8	No	No	Unidentified	0	Unidentified	0	No	T2_Spiked_After_Box1_Wz		-
2021-07-08	Spiked	After	1	1	-	Natural Material - SPT ppt	Medium	Wizard	910	53.5	45.7	53.5	45.7	No	No	unknown ppt 1	79.09	unknown ppt 1	79.09	No	T2_Spiked_After_Box1_Wz		-
2021-07-08	Spiked	After	1	1	-	Unidentified	Medium	Wizard	911	74.7	49.5	74.7	49.5	No	No	Unidentified	0	Unidentified	0	No	T2_Spiked_After_Box1_Wz		-
2021-07-08	Spiked	After	1	1	-	Unidentified	Medium	Wizard	912	86.9	60.2	86.9	60.2	No	No	Unidentified	0	Unidentified	0	No	T2_Spiked_After_Box1_Wz		-
2021-07-08	Spiked	After	1	1	-	Unidentified	Medium	Wizard	913	156.6	72.3	156.6	72.3	Yes	No	Unidentified	0	Unidentified	0	No	T2_Spiked_After_Box1_Wz		-
2021-07-08	Spiked	After	1	1	-	Unidentified	Large	Wizard	914	831.2	411.1	831.2	411.1	Yes	No	Unidentified	0	Unidentified	0	No	T2_Spiked_After_Box1_Wz		-
2021-07-08	Spiked	After	1	1	-	Unidentified	Medium	Wizard	915	231.9	72.3	231.9	72.3	Yes	No	Unidentified	0	Unidentified	0	No	T2_Spiked_After_Box1_Wz		-
2021-07-08	Spiked	After	1	1	-	Unidentified	Large	Wizard	916	398.7	134.3	398.7	134.3	Yes	No	Unidentified	0	Unidentified	0	No	T2_Spiked_After_Box1_Wz		-
2021-07-08	Spiked	After	1	1	-	Unidentified	Medium	Wizard	917	60.1	44.4	60.1	44.4	No	No	Unidentified	0	Unidentified	0	No	T2_Spiked_After_Box1_Wz		-
2021-07-08	Spiked	After	1	1	-	Natural Material - SPT ppt	Medium	Wizard	918	53.5	19.1	53.5	19.1	No	No	unknown ppt 1	80.51	unknown ppt 1	80.51	No	T2_Spiked_After_Box1_Wz		-
2021-07-08	Spiked	After	1	1	-	Natural Material - SPT ppt	Medium	Wizard	919	46.8	25.5	46.8	25.5	No	No	unknown ppt 1	84.62	unknown ppt 1	84.62	No	T2_Spiked_After_Box1_Wz		-
2021-07-08	Spiked	After	1	1	-	Natural Material - SPT ppt	Medium	Wizard	920	53.5	42.5	53.5	42.5	No	No	unknown ppt 1	79.34	unknown ppt 1	79.34	No	T2_Spiked_After_Box1_Wz		-
2021-07-08	Spiked	After	1	1	-	Unidentified	Medium	Wizard	921	280.7	101.7	280.7	101.7	Yes	No	Unidentified	0	Unidentified	0	No	T2_Spiked_After_Box1_Wz		-
2021-07-08	Spiked	After	1	1	-	Unidentified	Medium	Wizard	922	83.7	45.5	83.7	45.5	No	No	Unidentified	0	Unidentified	0	No	T2_Spiked_After_Box1_Wz		-
2021-07-08	Spiked	After	1	1	-	Natural Material - SPT ppt	Large	Wizard	923	444.3	132.7	444.3	132.7	Yes	No	unknown ppt 1	77.23	unknown ppt 1	77.23	No	T2_Spiked_After_Box1_Wz		-
2021-07-08	Spiked	After	1	1	-	Natural Material - SPT ppt	Medium	Wizard	924	73.5	39.4	73.5	39.4	No	No	unknown ppt 1	89.24	unknown ppt 1	89.24	No	T2_Spiked_After_Box1_Wz		-
2021-07-08	Spiked	After	1	1	-	Natural Material - Crumb Rubber Changed	Medium	Wizard	925	46.8	35.2	46.8	35.2	No	No	CR300PLUS_7	76.61	CR300PLUS_7	76.61	No	T2_Spiked_After_Box1_Wz	no black particle under point	no
2021-07-08	Spiked	After	1	1	-	Unidentified	Medium	Wizard	926	167	100.7	167	100.7	Yes	No	Unidentified	0	Unidentified	0	No	T2_Spiked_After_Box1_Wz		-
2021-07-08	Spiked	After	1	1	-	Unidentified	Medium	Wizard	927	74.7	41.9	74.7	41.9	No	No	Unidentified	0	Unidentified	0	No	T2_Spiked_After_Box1_Wz		-
2021-07-08	Spiked	After	1	1	-	CR	Medium	Wizard	928	72.3	44	72.3	44	No	No	CRUMBRUBBER300PLUS_1	76.26	CRUMBRUBBER300PLUS_1	76.26	No	T2_Spiked_After_Box1_Wz		yes
2021-07-08	Spiked	After	1	1	-	Natural Material - SPT ppt	Large	Wizard	929	311.8	80.9	311.8	80.9	Yes	No	unknown ppt 1	83.04	unknown ppt 1	83.04	No	T2_Spiked_After_Box1_Wz		-
2021-07-08	Spiked	After	1	1	-	Unidentified	Medium	Wizard	930	53.5	33	53.5	33	No	No	Unidentified	0	Unidentified	0	No	T2_Spiked_After_Box1_Wz		-
2021-07-08	Spiked	After	1	1	-	Unidentified	Medium	Wizard	931	53.5	35.1	53.5	35.1	No	No	Unidentified	0	Unidentified	0	No	T2_Spiked_After_Box1_Wz		-
2021-07-08	Spiked	After	1	1	-	Unidentified	Medium	Wizard	932	46.8	23.1	46.8	23.1	No	No	Unidentified	0	Unidentified	0	No	T2_Spiked_After_Box1_Wz		-
2021-07-08	Spiked	After	1	1	-	Unidentified	Medium	Wizard	933	48.2	40.1	48.2	40.1	No	No	Unidentified	0	Unidentified	0	No	T2_Spiked_After_Box1_Wz		-
2021-07-08	Spiked	After	1	1	-	Unidentified	Medium	Wizard	934	133.6	38.3	133.6	38.3	Yes	No	Unidentified	0	Unidentified	0	No	T2_Spiked_After_Box1_Wz		-
2021-07-08	Spiked	After	1	1	-	Natural Material - SPT ppt	Medium	Wizard	935	46.8	37.7	46.8	37.7	No	No	unknown ppt 1	77.03	unknown ppt 1	77.03	No	T2_Spiked_After_Box1_Wz		-
2021-07-08	Spiked	After	1	1	-	Unidentified	Medium	Wizard	936	46.8	28	46.8	28	No	No	Unidentified	0	Unidentified	0	No	T2_Spiked_After_Box1_Wz		-
2021-07-08	Spiked	After	1	1	-	Unidentified	Medium	Wizard	937	73.5	48.7	73.5	48.7	No	No	Unidentified	0	Unidentified	0	No	T2_Spiked_After_Box1_Wz		-
2021-07-08	Spiked	After	1	1	-	Natural Material - SPT ppt	Medium	Wizard	938	66.8	33.2	66.8	33.2	No	No	unknown ppt 1	80.75	unknown ppt 1	80.75	No	T2_Spiked_After_Box1_Wz		-
2021-07-08	Spiked	After	1	1	-	Natural Material - SPT ppt	Medium	Wizard	939	180.4	56.7	180.4	56.7	Yes	No	unknown ppt 1	75.42	unknown ppt 1	75.42	No	T2_Spiked_After_Box1_Wz		-
2021-07-08	Spiked	After	1	1	-	Unidentified	Medium	Wizard	940	141.6	40.1	141.6	40.1	Yes	No	Unidentified	0	Unidentified	0	No	T2_Spiked_After_Box1_Wz		-
2021-07-08	Spiked	After	1	1	-	Unidentified	Medium	Wizard	941	120.3	56.7	120.3	56.7	Yes	No	Unidentified	0	Unidentified	0	No	T2_Spiked_After_Box1_Wz		-
2021-07-08	Spiked	After	1	1	-	Unidentified	Medium	Wizard	942	80.7	45.8	80.7	45.8	No	No	Unidentified	0	Unidentified	0	No	T2_Spiked_After_Box1_Wz		-
2021-07-08	Spiked	After	1	1	-	Natural Material - SPT ppt	Medium	Wizard	943	83.7	59.1	83.7	59.1	No	No	unknown ppt 1	75.36	unknown ppt 1	75.36	No	T2_Spiked_After_Box1_Wz		-
2021-07-08	Spiked	After	1	1	-	Unidentified	Medium	Wizard	944	122.7	69.5	122.7	69.5	Yes	No	Unidentified	0	Unidentified	0	No	T2_Spiked_After_Box1_Wz		-
2021-07-08	Spiked	After	1	1	-	Unidentified	Medium	Wizard	945	73.5	36.4	73.5	36.4	No	No	Unidentified	0	Unidentified	0	No	T2_Spiked_After_Box1_Wz		-
2021-07-08	Spiked	After	1	1	-	Unidentified	Medium	Wizard	946	106.9	39.3	106.9	39.3	Yes	No	Unidentified	0	Unidentified	0	No	T2_Spiked_After_Box1_Wz		-
2021-07-08	Spiked	After	1	1	-	Unidentified	Medium	Wizard	947	86.9	32.7	86.9	32.7	No	No	Unidentified	0	Unidentified	0	No	T2_Spiked_After_Box1_Wz		-
2021-07-08	Spiked	After	1	1	-	Natural Material - SPT ppt	Medium	Wizard	948	57.5	24.7	57.5	24.7	No	No	unknown ppt 1	75.56	unknown ppt 1	75.56	No	T2_Spiked_After_Box1_Wz		-
2021-07-08	Spiked	After	1	1	-	Unidentified	Medium	Wizard	949	107.7	75.4	107.7	75.4	Yes	No	Unidentified	0	Unidentified	0	No	T2_Spiked_After_Box1_Wz		-
2021-07-08	Spiked	After	1	1	-	Natural Material - SPT ppt	Medium	Wizard	950	81.6	44.6	81.6	44.6	No	No	unknown ppt 1	85.58	unknown ppt 1	85.58	No	T2_Spiked_After_Box1_Wz		-
2021-07-08	Spiked	After	1	1	-	Natural Material - SPT ppt	Medium	Wizard	951	53.5	30.8	53.5	30.8	No	No	unknown ppt 1	79.76	unknown ppt 1	79.76	No	T2_Spiked_After_Box1_Wz		-
2021-07-08	Spiked	After	1	1	-	Natural Material - SPT ppt	Medium	Wizard	952	96.4	42.5	96.4	42.5	No	No	unknown ppt 1	83.05	unknown ppt 1	83.05	No	T2_Spiked_After_Box1_Wz		-
2021-07-08	Spiked	After	1	1	-	Unidentified	Medium	Wizard	953	119.5	53.7	119.5	53.7	Yes	No	Unidentified	0	Unidentified	0	No	T2_Spiked_After_Box1_Wz		-
2021-07-08	Spiked	After	1	1	-	Natural Material - SPT ppt	Medium	Wizard	954	86.9	27.5	86.9	27.5	No	No	unknown ppt 1	78.97	unknown ppt 1	78.97	No	T2_Spiked_After_Box1_Wz		-
2021-07-08	Spiked	After	1	1	-	Unidentified	Medium	Wizard	955	146.5	90.4	146.5	90.4	Yes	No	Unidentified	0	Unidentified	0	No	T2_Spiked_After_Box1_Wz		-
2021-07-08	Spiked	After	1	1	-	Natural Material - SPT ppt	Medium	Wizard	956	80.2	29.1	80.2	29.1	No	No	unknown ppt 1	78	unknown ppt 1	78	No	T2_Spiked_After_Box1_Wz		-
2021-07-08	Spiked	After	1	1	-	Unidentified	Medium	Wizard	957	266.1	129.7	266.1	129.7	Yes	No	Unidentified	0	Unidentified	0	No	T2_Spiked_After_Box1_Wz		-
2021-07-08	Spiked	After	1	1	-	Unidentified	Medium	Wizard	958	100.2	32.9	100.2	32.9	Yes	No	Unidentified	0	Unidentified	0	No	T2_Spiked_After_Box1_Wz		-
2021-07-08	Spiked	After	1	1	-	Natural Material - SPT ppt	Medium	Wizard	959	95	74.8	95	74.8	No	No	unknown ppt 1	76.79	unknown ppt 1	76.79	No	T2_Spiked_After_Box1_Wz		-
2021-07-08	Spiked	After	1	1	-	Unidentified	Medium	Wizard	960	100.2	63.5	100.2	63.5	Yes	No	Unidentified	0	Unidentified	0	No	T2_Spiked_After_Box1_Wz		-
2021-07-08	Spiked	After	1	1	-	Natural Material - SPT ppt	Large	Wizard	961	307.7	103.5	307.7	103.5	Yes	No	unknown ppt 1	77.4	unknown ppt 1	77.4	No	T2_Spiked_After_Box1_Wz		-
2021-07-08	Spiked	After	1	1	-	Natural Material - SPT ppt	Large	Wizard	962	430.3	174	430.3	174	Yes	No	unknown ppt 1	76.22	unknown ppt 1	76.22	No	T2_Spiked_After_Box1_Wz		-
2021-07-08	Spiked	After	1	1	-	Unidentified	Medium	Wizard	963	81.6	50.2	81.6	50.2	No	No	Unidentified	0	Unidentified	0	No	T2_Spiked_After_Box1_Wz		-
2021-07-08	Spiked	After	1	1	-	Natural Material - SPT ppt	Medium	Wizard	964	66.8	25.5	66.8	25.5	No	No	unknown ppt 1	80.55	unknown ppt 1	80.55	No	T2_Spiked_After_Box1_Wz		-
2021-07-08	Spiked	After	1	1	-	Unidentified	Medium	Wizard	965	60.1	23.6	60.1	23.6	No	No	Unidentified	0	Unidentified	0	No	T2_Spiked_After_Box1_Wz		-
2021-07-08	Spiked	After	1	1	-	Unidentified	Medium	Wizard	966	113.6	63.6	113.6	63.6	Yes	No	Unidentified	0	Unidentified	0	No	T2_Spiked_After_Box1_Wz		-
2021-07-08	Spiked	After	1	1	-	Natural Material - SPT ppt	Medium	Wizard	967	46.8	24.3	46.8	24.3	No	No	unknown ppt 1	82.33	unknown ppt 1	82.33	No	T2_Spiked_After_Box1_Wz		-
2021-07-08	Spiked	After	1	1	-	Natural Material - SPT ppt	Large	Wizard	968	930	242.6	930	242.6	Yes	No	unknown ppt 1	81.16	unknown ppt 1	81.16	No	T2_Spiked_After_Box1_Wz		-
2021-07-08	Spiked	After	1	1	-	Natural Material - SPT ppt	Medium	Wizard	969	66.8	31.5	66.8	31.5	No	No	unknown ppt 1	76.71	unknown ppt 1	76.71	No	T2_Spiked_After_Box1_Wz		-
2021-07-08	Spiked	After	1	1	-	Natural Material - SPT ppt	Large	Wizard	970	308	132.7	308	132.7	Yes	No	unknown ppt 1	75.4	unknown ppt 1	75.4	No	T2_Spiked_After_Box1_Wz		-
2021-07-08	Spiked	After	1	1	-	Unidentified	Medium	Wizard	971	53.5	34	53.5	34	No	No	Unidentified	0	Unidentified	0	No	T2_Spiked_After_Box1_Wz		-
2021-07-08	Spiked	After	1	1	-	Natural Material - SPT ppt	Medium	Wizard	972	60.1	51	60.1	51	No	No	unknown ppt 1	78.57	unknown ppt 1	78.57	No	T2_Spiked_After_Box1_Wz		-
2021-07-08	Spiked	After	1	1	-	Natural Material - SPT ppt	Medium	Wizard	973	72.3	35.4	72.3	35.4	No	No	unknown ppt 1	76.87	unknown ppt 1	76.87	No	T2_Spiked_After_Box1_Wz		-
2021-07-08	Spiked	After	1	1	-	Natural Material - SPT ppt	Medium	Wizard	974	98.7	44.9	98.7	44.9	No	No	unknown ppt 1	82	unknown ppt 1	82	No	T2_Spiked_After_Box1_Wz		-
2021-07-08	Spiked	After	1	1	-	Natural Material - SPT ppt	Medium	Wizard	975	183.5	63.8	183.5	63.8	Yes	No	unknown ppt 1	87.17	unknown ppt 1	87.17	No	T2_Spiked_After_Box1_Wz		-
2021-07-08	Spiked	After	1	1	-	Natural Material - SPT ppt	Large	Wizard	976	314	80.6	314	80.6	Yes	No	unknown ppt 1	76.77	unknown ppt 1	76.77	No	T2_Spiked_After_Box1_Wz		-
2021-07-08	Spiked	After	1	1	-	Unidentified	Medium	Wizard	977	187.1	75.4	187.1	75.4	Yes	No	Unidentified	0	Unidentified	0	No	T2_Spiked_After_Box1_Wz		-
2021-07-08	Spiked	After	1	1	-	Natural Material - SPT ppt	Medium	Wizard	978	124.3	64.5	124.3	64.5	Yes	No	unknown ppt 1	78.66	unknown ppt 1	78.66	No	T2_Spiked_After_Box1_Wz		-
2021-07-08	Spiked	After	1	1	-	Natural Material - SPT ppt	Medium	Wizard	979	73.5	45.6	73.5	45.6	No	No	unknown ppt 1	76.9	unknown ppt 1	76.9	No	T2_Spiked_After_Box1_Wz		-
2021-07-08	Spiked	After	1	1	-	Unidentified	Large	Wizard	980	300.7	69	300.7	69	Yes	No	Unidentified	0	Unidentified	0	No	T2_Spiked_After_Box1_Wz		-
2021-07-08	Spiked	After	1	1	-	Natural Material - SPT ppt	Medium	Wizard	981	200.5	74	200.5	74	Yes	No	unknown ppt 1	82.69	unknown ppt 1	82.69	No	T2_Spiked_After_Box1_Wz		-
2021-07-08	Spiked	After	1	1	-	Unidentified	Medium	Wizard	982	53.5	42.5	53.5	42.5	No	No	Unidentified	0	Unidentified	0	No	T2_Spiked_After_Box1_Wz		-
2021-07-08	Spiked	After	1	1	-	Unidentified	Medium	Wizard	983	46.8	26.7	46.8	26.7	No	No	Unidentified	0	Unidentified	0	No	T2_Spiked_After_Box1_Wz		-
2021-07-08	Spiked	After	1	1	-	Natural Material - SPT ppt	Medium	Wizard	984	48.2	41.3	48.2	41.3	No	No	unknown ppt 1	77.48	unknown ppt 1	77.48	No	T2_Spiked_After_Box1_Wz		-
2021-07-08	Spiked	After	1	1	-	Unidentified	Medium	Wizard	985	53.9	48.5	53.9	48.5	No	No	Unidentified	0	Unidentified	0	No	T2_Spiked_After_Box1_Wz		-
2021-07-08	Spiked	After	1	1	-	Natural Material - SPT ppt	Medium	Wizard	986	120.5	51.4	120.5	51.4	Yes	No	unknown ppt 1	76.64	unknown ppt 1	76.64	No	T2_Spiked_After_Box1_Wz		-
2021-07-08	Spiked	After	1	1	-	Natural Material - SPT ppt	Medium	Wizard	987	53.9	24.3	53.9	24.3	No	No	unknown ppt 1	78.79	unknown ppt 1	78.79	No	T2_Spiked_After_Box1_Wz		-
2021-07-08	Spiked	After	1	1	-	Unidentified	Medium	Wizard	988	270.8	42.6	270.8	42.6	Yes	No	Unidentified	0	Unidentified	0	No	T2_Spiked_After_Box1_Wz		-
2021-07-08	Spiked	After	1	1	-	Natural Material - SPT ppt	Medium	Wizard	989	66.8	43.4	66.8	43.4	No	No	unknown ppt 1	83.21	unknown ppt 1	83.21	No	T2_Spiked_After_Box1_Wz		-
2021-07-08	Spiked	After	1	1	-	Unidentified	Medium	Wizard	990	93.5	48	93.5	48	No	No	Unidentified	0	Unidentified	0	No	T2_Spiked_After_Box1_Wz		-
2021-07-08	Spiked	After	1	1	-	Natural Material - SPT ppt	Medium	Wizard	991	60.1	24.6	60.1	24.6	No	No	unknown ppt 1	79.01	unknown ppt 1	79.01	No	T2_Spiked_After_Box1_Wz		-
2021-07-08	Spiked	After	1	1	-	Natural Material - SPT ppt	Medium	Wizard	992	140.3	72.5	140.3	72.5	Yes	No	unknown ppt 1	82.89	unknown ppt 1	82.89	No	T2_Spiked_After_Box1_Wz		-
2021-07-08	Spiked	After	1	1	-	Unidentified	Medium	Wizard	993	46.8	19.4	46.8	19.4	No	No	Unidentified	0	Unidentified	0	No	T2_Spiked_After_Box1_Wz		-
2021-07-08	Spiked	After	1	1	-	Natural Material - SPT ppt	Medium	Wizard	994	100.2	20.4	100.2	20.4	Yes	No	unknown ppt 1	76.43	unknown ppt 1	76.43	No	T2_Spiked_After_Box1_Wz		-
2021-07-08	Spiked	After	1	1	-	Unidentified	Medium	Wizard	995	80.7	56.3	80.7	56.3	No	No	Unidentified	0	Unidentified	0	No	T2_Spiked_After_Box1_Wz		-
2021-07-08	Spiked	After	1	1	-	Natural Material - SPT ppt	Medium	Wizard	996	239.5	44.1	239.5	44.1	Yes	No	unknown ppt 1	81.4	unknown ppt 1	81.4	No	T2_Spiked_After_Box1_Wz		-
2021-07-08	Spiked	After	1	1	-	Natural Material - SPT ppt	Medium	Wizard	997	60.1	28.4	60.1	28.4	No	No	unknown ppt 1	82.62	unknown ppt 1	82.62	No	T2_Spiked_After_Box1_Wz		-
2021-07-08	Spiked	After	1	1	-	Unidentified	Medium	Wizard	998	158.4	38.4	158.4	38.4	Yes	No	Unidentified	0	Unidentified	0	No	T2_Spiked_After_Box1_Wz		-
2021-07-08	Spiked	After	1	1	-	Natural Material - SPT ppt	Medium	Wizard	999	73.5	34.8	73.5	34.8	No	No	unknown ppt 1	75.41	unknown ppt 1	75.41	No	T2_Spiked_After_Box1_Wz		-
2021-07-08	Spiked	After	1	1	-	Unidentified	Medium	Wizard	1000	66.8	38.3	66.8	38.3	No	No	Unidentified	0	Unidentified	0	No	T2_Spiked_After_Box1_Wz		-
2021-07-08	Spiked	After	1	1	-	Natural Material - SPT ppt	Medium	Wizard	1001	260.9	70.6	260.9	70.6	Yes	No	unknown ppt 1	90.71	unknown ppt 1	90.71	No	T2_Spiked_After_Box1_Wz		-
2021-07-08	Spiked	After	1	1	-	Natural Material - SPT ppt	Medium	Wizard	1002	72.3	56.6	72.3	56.6	No	No	unknown ppt 1	80.97	unknown ppt 1	80.97	No	T2_Spiked_After_Box1_Wz		-
2021-07-08	Spiked	After	1	1	-	Unidentified	Medium	Wizard	1003	200.5	81.7	200.5	81.7	Yes	No	Unidentified	0	Unidentified	0	No	T2_Spiked_After_Box1_Wz		-
2021-07-08	Spiked	After	1	1	-	Natural Material - SPT ppt	Medium	Wizard	1004	63	34.3	63	34.3	No	No	unknown ppt 1	83.47	unknown ppt 1	83.47	No	T2_Spiked_After_Box1_Wz		-
2021-07-08	Spiked	After	1	1	-	Natural Material - SPT ppt	Medium	Wizard	1005	127	68.5	127	68.5	Yes	No	unknown ppt 1	82.38	unknown ppt 1	82.38	No	T2_Spiked_After_Box1_Wz		-
2021-07-08	Spiked	After	1	1	-	Natural Material - SPT ppt	Medium	Wizard	1006	86.9	34	86.9	34	No	No	unknown ppt 1	79.83	unknown ppt 1	79.83	No	T2_Spiked_After_Box1_Wz		-
2021-07-08	Spiked	After	1	1	-	Natural Material - SPT ppt	Medium	Wizard	1007	120.3	51	120.3	51	Yes	No	unknown ppt 1	85.89	unknown ppt 1	85.89	No	T2_Spiked_After_Box1_Wz		-
2021-07-08	Spiked	After	1	1	-	Natural Material - SPT ppt	Medium	Wizard	1008	60.1	20.8	60.1	20.8	No	No	unknown ppt 1	86.81	unknown ppt 1	86.81	No	T2_Spiked_After_Box1_Wz		-
2021-07-08	Spiked	After	1	1	-	Natural Material - SPT ppt	Medium	Wizard	1009	80.2	31.9	80.2	31.9	No	No	unknown ppt 1	81.55	unknown ppt 1	81.55	No	T2_Spiked_After_Box1_Wz		-
2021-07-08	Spiked	After	1	1	-	Natural Material - SPT ppt	Medium	Wizard	1010	81.6	59.9	81.6	59.9	No	No	unknown ppt 1	85.41	unknown ppt 1	85.41	No	T2_Spiked_After_Box1_Wz		-
2021-07-08	Spiked	After	1	1	-	PVC	Large	Wizard	1011	2490.8	985.6	1359	904	Yes	No	PVC300PLUS_10	98.6	PVC300PLUS_10	98.6	yes	T2_Spiked_After_Box1_Wz		yes
2021-07-08	Spiked	After	1	1	-	Natural Material - SPT ppt	Medium	Wizard	1012	60.1	31.2	60.1	31.2	No	No	unknown ppt 1	80.25	unknown ppt 1	80.25	No	T2_Spiked_After_Box1_Wz		-
2021-07-08	Spiked	After	1	1	-	Natural Material - SPT ppt	Medium	Wizard	1013	113.6	51.5	113.6	51.5	Yes	No	unknown ppt 1	75.94	unknown ppt 1	75.94	No	T2_Spiked_After_Box1_Wz		-
2021-07-08	Spiked	After	1	1	-	Natural Material - SPT ppt	Large	Wizard	1014	369.9	114.6	369.9	114.6	Yes	No	unknown ppt 1	83.08	unknown ppt 1	83.08	No	T2_Spiked_After_Box1_Wz		-
2021-07-08	Spiked	After	1	1	-	Natural Material - SPT ppt	Medium	Wizard	1015	106.9	44.1	106.9	44.1	Yes	No	unknown ppt 1	86.04	unknown ppt 1	86.04	No	T2_Spiked_After_Box1_Wz		-
2021-07-08	Spiked	After	1	1	-	Natural Material - SPT ppt	Medium	Wizard	1016	133.6	67.2	133.6	67.2	Yes	No	unknown ppt 1	78.93	unknown ppt 1	78.93	No	T2_Spiked_After_Box1_Wz		-
2021-07-08	Spiked	After	1	1	-	Natural Material - SPT ppt	Medium	Wizard	1017	127	69	127	69	Yes	No	unknown ppt 1	84.28	unknown ppt 1	84.28	No	T2_Spiked_After_Box1_Wz		-
2021-07-08	Spiked	After	1	1	-	Natural Material - SPT ppt	Medium	Wizard	1018	52.2	31.6	52.2	31.6	No	No	unknown ppt 1	82.06	unknown ppt 1	82.06	No	T2_Spiked_After_Box1_Wz		-
2021-07-08	Spiked	After	1	1	-	Natural Material - SPT ppt	Medium	Wizard	1019	253.9	105.9	253.9	105.9	Yes	No	unknown ppt 1	85.99	unknown ppt 1	85.99	No	T2_Spiked_After_Box1_Wz		-
2021-07-08	Spiked	After	1	1	-	Natural Material - SPT ppt	Medium	Wizard	1020	93.5	39.5	93.5	39.5	No	No	unknown ppt 1	75.66	unknown ppt 1	75.66	No	T2_Spiked_After_Box1_Wz		-
2021-07-08	Spiked	After	1	1	-	Natural Material - SPT ppt	Medium	Wizard	1021	46.8	34	46.8	34	No	No	unknown ppt 1	86.96	unknown ppt 1	86.96	No	T2_Spiked_After_Box1_Wz		-
2021-07-08	Spiked	After	1	1	-	Unidentified	Medium	Wizard	1022	73.5	36.4	73.5	36.4	No	No	Unidentified	0	Unidentified	0	No	T2_Spiked_After_Box1_Wz		-
2021-07-08	Spiked	After	1	1	-	Natural Material - SPT ppt	Medium	Wizard	1023	53.5	17	53.5	17	No	No	unknown ppt 1	83.36	unknown ppt 1	83.36	No	T2_Spiked_After_Box1_Wz		-
2021-07-08	Spiked	After	1	1	-	Unidentified	Medium	Wizard	1024	71	28.8	71	28.8	No	No	Unidentified	0	Unidentified	0	No	T2_Spiked_After_Box1_Wz		-
2021-07-08	Spiked	After	1	1	-	Unidentified	Medium	Wizard	1025	100.2	55.6	100.2	55.6	Yes	No	Unidentified	0	Unidentified	0	No	T2_Spiked_After_Box1_Wz		-
2021-07-08	Spiked	After	1	1	-	Natural Material - SPT ppt	Medium	Wizard	1026	133.6	35.3	133.6	35.3	Yes	No	unknown ppt 1	82.93	unknown ppt 1	82.93	No	T2_Spiked_After_Box1_Wz		-
2021-07-08	Spiked	After	1	1	-	Natural Material - SPT ppt	Medium	Wizard	1027	66.8	40.8	66.8	40.8	No	No	unknown ppt 1	80.85	unknown ppt 1	80.85	No	T2_Spiked_After_Box1_Wz		-
2021-07-08	Spiked	After	1	1	-	Natural Material - SPT ppt	Medium	Wizard	1028	66.8	49.3	66.8	49.3	No	No	unknown ppt 1	78.64	unknown ppt 1	78.64	No	T2_Spiked_After_Box1_Wz		-
2021-07-08	Spiked	After	1	1	-	Unidentified	Medium	Wizard	1029	46.8	31.6	46.8	31.6	No	No	Unidentified	0	Unidentified	0	No	T2_Spiked_After_Box1_Wz		-
2021-07-08	Spiked	After	1	1	-	Unidentified	Medium	Wizard	1030	73.5	42.5	73.5	42.5	No	No	Unidentified	0	Unidentified	0	No	T2_Spiked_After_Box1_Wz		-
2021-07-08	Spiked	After	1	1	-	Natural Material - SPT ppt	Medium	Wizard	1031	66.8	34	66.8	34	No	No	unknown ppt 1	78.34	unknown ppt 1	78.34	No	T2_Spiked_After_Box1_Wz		-
2021-07-08	Spiked	After	1	1	-	Natural Material - SPT ppt	Medium	Wizard	1032	60.1	27.4	60.1	27.4	No	No	unknown ppt 1	79.3	unknown ppt 1	79.3	No	T2_Spiked_After_Box1_Wz		-
2021-07-08	Spiked	After	1	1	-	Natural Material - SPT ppt	Medium	Wizard	1033	86.9	53.7	86.9	53.7	No	No	unknown ppt 1	76.72	unknown ppt 1	76.72	No	T2_Spiked_After_Box1_Wz		-
2021-07-08	Spiked	After	1	1	-	Natural Material - SPT ppt	Medium	Wizard	1034	193.8	53.1	193.8	53.1	Yes	No	unknown ppt 1	87.77	unknown ppt 1	87.77	No	T2_Spiked_After_Box1_Wz		-
2021-07-08	Spiked	After	1	1	-	Unidentified	Medium	Wizard	1035	53.9	34.8	53.9	34.8	No	No	Unidentified	0	Unidentified	0	No	T2_Spiked_After_Box1_Wz		-
2021-07-08	Spiked	After	1	1	-	Natural Material - SPT ppt	Medium	Wizard	1036	53.9	29.5	53.9	29.5	No	No	unknown ppt 1	79.06	unknown ppt 1	79.06	No	T2_Spiked_After_Box1_Wz		-
2021-07-08	Spiked	After	1	1	-	Unidentified	Medium	Wizard	1037	133.6	56.2	133.6	56.2	Yes	No	Unidentified	0	Unidentified	0	No	T2_Spiked_After_Box1_Wz		-
2021-07-08	Spiked	After	1	1	-	Unidentified	Medium	Wizard	1038	259.9	50.3	259.9	50.3	Yes	No	Unidentified	0	Unidentified	0	No	T2_Spiked_After_Box1_Wz		-
2021-07-08	Spiked	After	1	1	-	Unidentified	Medium	Wizard	1039	122.7	47.7	122.7	47.7	Yes	No	Unidentified	0	Unidentified	0	No	T2_Spiked_After_Box1_Wz		-
2021-07-08	Spiked	After	1	1	-	Natural Material - SPT ppt	Medium	Wizard	1040	100.2	48.8	100.2	48.8	Yes	No	unknown ppt 1	84.39	unknown ppt 1	84.39	No	T2_Spiked_After_Box1_Wz		-
2021-07-08	Spiked	After	1	1	-	Unidentified	Medium	Wizard	1041	80.2	51	80.2	51	No	No	Unidentified	0	Unidentified	0	No	T2_Spiked_After_Box1_Wz		-
2021-07-08	Spiked	After	1	1	-	Unidentified	Medium	Wizard	1042	73.5	27.1	73.5	27.1	No	No	Unidentified	0	Unidentified	0	No	T2_Spiked_After_Box1_Wz		-
2021-07-08	Spiked	After	1	1	-	Natural Material - SPT ppt	Large	Wizard	1043	557.8	149	557.8	149	Yes	No	unknown ppt 1	84.95	unknown ppt 1	84.95	No	T2_Spiked_After_Box1_Wz		-
2021-07-08	Spiked	After	1	1	-	Natural Material - SPT ppt	Medium	Wizard	1044	93.5	33.4	93.5	33.4	No	No	unknown ppt 1	79.72	unknown ppt 1	79.72	No	T2_Spiked_After_Box1_Wz		-
2021-07-08	Spiked	After	1	1	-	Unidentified	Medium	Wizard	1045	127	29.6	127	29.6	Yes	No	Unidentified	0	Unidentified	0	No	T2_Spiked_After_Box1_Wz		-
2021-07-08	Spiked	After	1	1	-	Unidentified	Medium	Wizard	1046	134.5	41	134.5	41	Yes	No	Unidentified	0	Unidentified	0	No	T2_Spiked_After_Box1_Wz		-
2021-07-08	Spiked	After	1	1	-	Natural Material - SPT ppt	Medium	Wizard	1047	128.4	71.3	128.4	71.3	Yes	No	unknown ppt 1	86.74	unknown ppt 1	86.74	No	T2_Spiked_After_Box1_Wz		-
2021-07-08	Spiked	After	1	1	-	Natural Material - SPT ppt	Medium	Wizard	1048	104.4	46.8	104.4	46.8	Yes	No	unknown ppt 1	88.69	unknown ppt 1	88.69	No	T2_Spiked_After_Box1_Wz		-
2021-07-08	Spiked	After	1	1	-	Unidentified	Medium	Wizard	1049	53.5	35.1	53.5	35.1	No	No	Unidentified	0	Unidentified	0	No	T2_Spiked_After_Box1_Wz		-
2021-07-08	Spiked	After	1	1	-	Natural Material - SPT ppt	Large	Wizard	1050	716.8	195.1	716.8	195.1	Yes	No	unknown ppt 1	78.92	unknown ppt 1	78.92	No	T2_Spiked_After_Box1_Wz		-
2021-07-08	Spiked	After	1	1	-	Natural Material - SPT ppt	Medium	Wizard	1051	127	55.1	127	55.1	Yes	No	unknown ppt 1	76.28	unknown ppt 1	76.28	No	T2_Spiked_After_Box1_Wz		-
2021-07-08	Spiked	After	1	1	-	Unidentified	Medium	Wizard	1052	53.5	25.5	53.5	25.5	No	No	Unidentified	0	Unidentified	0	No	T2_Spiked_After_Box1_Wz		-
2021-07-08	Spiked	After	1	1	-	Unidentified	Medium	Wizard	1053	60.1	48.2	60.1	48.2	No	No	Unidentified	0	Unidentified	0	No	T2_Spiked_After_Box1_Wz		-
2021-07-08	Spiked	After	1	1	-	Natural Material - SPT ppt	Large	Wizard	1054	308.3	120.8	308.3	120.8	Yes	No	unknown ppt 1	75.03	unknown ppt 1	75.03	No	T2_Spiked_After_Box1_Wz		-
2021-07-08	Spiked	After	1	1	-	Natural Material - SPT ppt	Medium	Wizard	1055	236.2	92.4	236.2	92.4	Yes	No	unknown ppt 1	75.68	unknown ppt 1	75.68	No	T2_Spiked_After_Box1_Wz		-
2021-07-08	Spiked	After	1	1	-	Unidentified	Medium	Wizard	1056	100.2	57.9	100.2	57.9	Yes	No	Unidentified	0	Unidentified	0	No	T2_Spiked_After_Box1_Wz		-
2021-07-08	Spiked	After	1	1	-	Natural Material - SPT ppt	Medium	Wizard	1057	48.2	34.2	48.2	34.2	No	No	unknown ppt 1	86.99	unknown ppt 1	86.99	No	T2_Spiked_After_Box1_Wz		-
2021-07-08	Spiked	After	1	1	-	Natural Material - SPT ppt	Medium	Wizard	1058	245.3	69.5	245.3	69.5	Yes	No	unknown ppt 1	81.04	unknown ppt 1	81.04	No	T2_Spiked_After_Box1_Wz		-
2021-07-08	Spiked	After	1	1	-	Natural Material - SPT ppt	Medium	Wizard	1059	56.7	28.1	56.7	28.1	No	No	unknown ppt 1	79.44	unknown ppt 1	79.44	No	T2_Spiked_After_Box1_Wz		-
2021-07-08	Spiked	After	1	1	-	Natural Material - SPT ppt	Medium	Wizard	1060	127	48.8	127	48.8	Yes	No	unknown ppt 1	80.83	unknown ppt 1	80.83	No	T2_Spiked_After_Box1_Wz		-
2021-07-08	Spiked	After	1	1	-	Natural Material - SPT ppt	Medium	Wizard	1061	211.3	77.5	211.3	77.5	Yes	No	unknown ppt 1	84.97	unknown ppt 1	84.97	No	T2_Spiked_After_Box1_Wz		-
2021-07-08	Spiked	After	1	1	-	Unidentified	Medium	Wizard	1062	115	64.8	115	64.8	Yes	No	Unidentified	0	Unidentified	0	No	T2_Spiked_After_Box1_Wz		-
2021-07-08	Spiked	After	1	1	-	Natural Material - SPT ppt	Medium	Wizard	1063	63	47.8	63	47.8	No	No	unknown ppt 1	78.31	unknown ppt 1	78.31	No	T2_Spiked_After_Box1_Wz		-
2021-07-08	Spiked	After	1	1	-	Natural Material - SPT ppt	Medium	Wizard	1064	80.2	39	80.2	39	No	No	unknown ppt 1	82.33	unknown ppt 1	82.33	No	T2_Spiked_After_Box1_Wz		-
2021-07-08	Spiked	After	1	1	-	Natural Material - SPT ppt	Medium	Wizard	1065	86.9	36	86.9	36	No	No	unknown ppt 1	76.36	unknown ppt 1	76.36	No	T2_Spiked_After_Box1_Wz		-
2021-07-08	Spiked	After	1	1	-	Unidentified	Medium	Wizard	1066	135.3	45.4	135.3	45.4	Yes	No	Unidentified	0	Unidentified	0	No	T2_Spiked_After_Box1_Wz		-
2021-07-08	Spiked	After	1	1	-	Natural Material - SPT ppt	Medium	Wizard	1067	177.9	72.2	177.9	72.2	Yes	No	unknown ppt 1	78.67	unknown ppt 1	78.67	No	T2_Spiked_After_Box1_Wz		-
2021-07-08	Spiked	After	1	1	-	Natural Material - SPT ppt	Large	Wizard	1068	561.3	99.2	561.3	99.2	Yes	No	unknown ppt 1	87.02	unknown ppt 1	87.02	No	T2_Spiked_After_Box1_Wz		-
2021-07-08	Spiked	After	1	1	-	Unidentified	Medium	Wizard	1069	53.5	43.6	53.5	43.6	No	No	Unidentified	0	Unidentified	0	No	T2_Spiked_After_Box1_Wz		-
2021-07-08	Spiked	After	1	1	-	Unidentified	Large	Wizard	1070	307.4	103.6	307.4	103.6	Yes	No	Unidentified	0	Unidentified	0	No	T2_Spiked_After_Box1_Wz		-
2021-07-08	Spiked	After	1	1	-	Natural Material - SPT ppt	Medium	Wizard	1071	135.3	52.1	135.3	52.1	Yes	No	unknown ppt 1	85.07	unknown ppt 1	85.07	No	T2_Spiked_After_Box1_Wz		-
2021-07-08	Spiked	After	1	1	-	Natural Material - SPT ppt	Medium	Wizard	1072	179.9	93.8	179.9	93.8	Yes	No	unknown ppt 1	79.85	unknown ppt 1	79.85	No	T2_Spiked_After_Box1_Wz		-
2021-07-08	Spiked	After	1	1	-	Unidentified	Medium	Wizard	1073	46.8	29.2	46.8	29.2	No	No	Unidentified	0	Unidentified	0	No	T2_Spiked_After_Box1_Wz		-
2021-07-08	Spiked	After	1	1	-	Natural Material - SPT ppt	Large	Wizard	1074	454.4	133.9	454.4	133.9	Yes	No	unknown ppt 1	81.42	unknown ppt 1	81.42	No	T2_Spiked_After_Box1_Wz		-
2021-07-08	Spiked	After	1	1	-	Natural Material - SPT ppt	Medium	Wizard	1075	74.7	42.6	74.7	42.6	No	No	unknown ppt 1	79.75	unknown ppt 1	79.75	No	T2_Spiked_After_Box1_Wz		-
2021-07-08	Spiked	After	1	1	-	Natural Material - SPT ppt	Medium	Wizard	1076	120.3	45.4	120.3	45.4	Yes	No	unknown ppt 1	81.86	unknown ppt 1	81.86	No	T2_Spiked_After_Box1_Wz		-
2021-07-08	Spiked	After	1	1	-	Natural Material - SPT ppt	Medium	Wizard	1077	171.3	84.3	171.3	84.3	Yes	No	unknown ppt 1	75.76	unknown ppt 1	75.76	No	T2_Spiked_After_Box1_Wz		-
2021-07-08	Spiked	After	1	1	-	Natural Material - SPT ppt	Medium	Wizard	1078	73.5	60.3	73.5	60.3	No	No	unknown ppt 1	88.75	unknown ppt 1	88.75	No	T2_Spiked_After_Box1_Wz		-
2021-07-08	Spiked	After	1	1	-	Natural Material - SPT ppt	Medium	Wizard	1079	156.4	66.1	156.4	66.1	Yes	No	unknown ppt 1	78.8	unknown ppt 1	78.8	No	T2_Spiked_After_Box1_Wz		-
2021-07-08	Spiked	After	1	1	-	Unidentified	Medium	Wizard	1080	52.2	33.8	52.2	33.8	No	No	Unidentified	0	Unidentified	0	No	T2_Spiked_After_Box1_Wz		-
2021-07-08	Spiked	After	1	1	-	Natural Material - SPT ppt	Medium	Wizard	1081	86.9	32.1	86.9	32.1	No	No	unknown ppt 1	83.16	unknown ppt 1	83.16	No	T2_Spiked_After_Box1_Wz		-
2021-07-08	Spiked	After	1	1	-	Natural Material - SPT ppt	Medium	Wizard	1082	193.8	49.9	193.8	49.9	Yes	No	unknown ppt 1	82.89	unknown ppt 1	82.89	No	T2_Spiked_After_Box1_Wz		-
2021-07-08	Spiked	After	1	1	-	Unidentified	Large	Wizard	1083	555.7	121	555.7	121	Yes	No	Unidentified	0	Unidentified	0	No	T2_Spiked_After_Box1_Wz		-
2021-07-08	Spiked	After	1	1	-	Natural Material - SPT ppt	Medium	Wizard	1084	74.7	35	74.7	35	No	No	unknown ppt 1	84.78	unknown ppt 1	84.78	No	T2_Spiked_After_Box1_Wz		-
2021-07-08	Spiked	After	1	1	-	Natural Material - SPT ppt	Medium	Wizard	1085	73.5	26.3	73.5	26.3	No	No	unknown ppt 1	79.8	unknown ppt 1	79.8	No	T2_Spiked_After_Box1_Wz		-
2021-07-08	Spiked	After	1	1	-	Unidentified	Medium	Wizard	1086	80.2	34	80.2	34	No	No	Unidentified	0	Unidentified	0	No	T2_Spiked_After_Box1_Wz		-
2021-07-08	Spiked	After	1	1	-	Natural Material - SPT ppt	Large	Wizard	1087	1078.8	311.3	1078.8	311.3	Yes	No	unknown ppt 1	85.89	unknown ppt 1	85.89	No	T2_Spiked_After_Box1_Wz		-
2021-07-08	Spiked	After	1	1	-	Unidentified	Medium	Wizard	1088	60.1	29.3	60.1	29.3	No	No	Unidentified	0	Unidentified	0	No	T2_Spiked_After_Box1_Wz		-
2021-07-08	Spiked	After	1	1	-	Natural Material - SPT ppt	Medium	Wizard	1089	87.1	41.1	87.1	41.1	No	No	unknown ppt 1	76.99	unknown ppt 1	76.99	No	T2_Spiked_After_Box1_Wz		-
2021-07-08	Spiked	After	1	1	-	Unidentified	Medium	Wizard	1090	46.8	34	46.8	34	No	No	Unidentified	0	Unidentified	0	No	T2_Spiked_After_Box1_Wz		-
2021-07-08	Spiked	After	1	1	-	Natural Material - SPT ppt	Medium	Wizard	1091	48.2	20.1	48.2	20.1	No	No	unknown ppt 1	80.94	unknown ppt 1	80.94	No	T2_Spiked_After_Box1_Wz		-
2021-07-08	Spiked	After	1	1	-	Unidentified	Medium	Wizard	1092	287.4	119.1	287.4	119.1	Yes	No	Unidentified	0	Unidentified	0	No	T2_Spiked_After_Box1_Wz		-
2021-07-08	Spiked	After	1	1	-	Unidentified	Medium	Wizard	1093	47.2	46.9	47.2	46.9	No	No	Unidentified	0	Unidentified	0	No	T2_Spiked_After_Box1_Wz		-
2021-07-08	Spiked	After	1	1	-	Natural Material - Crumb Rubber Changed	Medium	Wizard	1094	61.6	38.8	61.6	38.8	No	No	CR300PLUS_7	78.12	CR300PLUS_7	78.12	No	T2_Spiked_After_Box1_Wz	no black particle, probably carbon based natural material	no
2021-07-08	Spiked	After	1	1	-	Unidentified	Medium	Wizard	1095	180.4	50.1	180.4	50.1	Yes	No	Unidentified	0	Unidentified	0	No	T2_Spiked_After_Box1_Wz		-
2021-07-08	Spiked	After	1	1	-	Unidentified	Medium	Wizard	1096	200.5	86.8	200.5	86.8	Yes	No	Unidentified	0	Unidentified	0	No	T2_Spiked_After_Box1_Wz		-
2021-07-08	Spiked	After	1	1	-	Unidentified	Medium	Wizard	1097	153.8	63.6	153.8	63.6	Yes	No	Unidentified	0	Unidentified	0	No	T2_Spiked_After_Box1_Wz		-
2021-07-08	Spiked	After	1	1	-	Natural Material - SPT ppt	Medium	Wizard	1098	46.8	28	46.8	28	No	No	unknown ppt 1	80.05	unknown ppt 1	80.05	No	T2_Spiked_After_Box1_Wz		-
2021-07-08	Spiked	After	1	1	-	Natural Material - SPT ppt	Medium	Wizard	1099	77.9	37.2	77.9	37.2	No	No	unknown ppt 1	78.15	unknown ppt 1	78.15	No	T2_Spiked_After_Box1_Wz		-
2021-07-08	Spiked	After	1	1	-	Natural Material - Crumb Rubber Changed	Medium	Wizard	1100	56.7	35.1	56.7	35.1	No	No	CR300PLUS_7	75.57	CR300PLUS_7	75.57	No	T2_Spiked_After_Box1_Wz	no black particle, probably carbon based natural material	no
2021-07-08	Spiked	After	1	1	-	Unidentified	Medium	Wizard	1101	53.5	36.2	53.5	36.2	No	No	Unidentified	0	Unidentified	0	No	T2_Spiked_After_Box1_Wz		-
2021-07-08	Spiked	After	1	1	-	Natural Material - SPT ppt	Medium	Wizard	1102	60.1	37.8	60.1	37.8	No	No	unknown ppt 1	77.57	unknown ppt 1	77.57	No	T2_Spiked_After_Box1_Wz		-
2021-07-08	Spiked	After	1	1	-	Natural Material - SPT ppt	Medium	Wizard	1103	147	35.6	147	35.6	Yes	No	unknown ppt 1	77.63	unknown ppt 1	77.63	No	T2_Spiked_After_Box1_Wz		-
2021-07-08	Spiked	After	1	1	-	Natural Material - SPT ppt	Large	Wizard	1104	307.4	115.2	307.4	115.2	Yes	No	unknown ppt 1	78.41	unknown ppt 1	78.41	No	T2_Spiked_After_Box1_Wz		-
2021-07-08	Spiked	After	1	1	-	Unidentified	Medium	Wizard	1105	215.5	75.2	215.5	75.2	Yes	No	Unidentified	0	Unidentified	0	No	T2_Spiked_After_Box1_Wz		-
2021-07-08	Spiked	After	1	1	-	Natural Material - SPT ppt	Medium	Wizard	1106	147	28.6	147	28.6	Yes	No	unknown ppt 1	79.87	unknown ppt 1	79.87	No	T2_Spiked_After_Box1_Wz		-
2021-07-08	Spiked	After	1	1	-	Unidentified	Medium	Wizard	1107	127	36.3	127	36.3	Yes	No	Unidentified	0	Unidentified	0	No	T2_Spiked_After_Box1_Wz		-
2021-07-08	Spiked	After	1	1	-	Natural Material - SPT ppt	Large	Wizard	1108	429.6	107.2	429.6	107.2	Yes	No	unknown ppt 1	80.28	unknown ppt 1	80.28	No	T2_Spiked_After_Box1_Wz		-
2021-07-08	Spiked	After	1	1	-	Unidentified	Medium	Wizard	1109	46.8	24.3	46.8	24.3	No	No	Unidentified	0	Unidentified	0	No	T2_Spiked_After_Box1_Wz		-
2021-07-08	Spiked	After	1	1	-	Unidentified	Large	Wizard	1110	350.3	147.2	350.3	147.2	Yes	No	Unidentified	0	Unidentified	0	No	T2_Spiked_After_Box1_Wz		-
2021-07-08	Spiked	After	1	1	-	Natural Material - SPT ppt	Medium	Wizard	1111	63	30.7	63	30.7	No	No	unknown ppt 1	78.9	unknown ppt 1	78.9	No	T2_Spiked_After_Box1_Wz		-
2021-07-08	Spiked	After	1	1	-	Natural Material - SPT ppt	Medium	Wizard	1112	120.3	50.6	120.3	50.6	Yes	No	unknown ppt 1	84.22	unknown ppt 1	84.22	No	T2_Spiked_After_Box1_Wz		-
2021-07-08	Spiked	After	1	1	-	Natural Material - SPT ppt	Medium	Wizard	1113	95.7	48.7	95.7	48.7	No	No	unknown ppt 1	75.54	unknown ppt 1	75.54	No	T2_Spiked_After_Box1_Wz		-
2021-07-08	Spiked	After	1	1	-	Unidentified	Medium	Wizard	1114	150.2	75	150.2	75	Yes	No	Unidentified	0	Unidentified	0	No	T2_Spiked_After_Box1_Wz		-
2021-07-08	Spiked	After	1	1	-	Unidentified	Medium	Wizard	1115	75.6	40.6	75.6	40.6	No	No	Unidentified	0	Unidentified	0	No	T2_Spiked_After_Box1_Wz		-
2021-07-08	Spiked	After	1	1	-	Natural Material - SPT ppt	Medium	Wizard	1116	48.2	36.6	48.2	36.6	No	No	unknown ppt 1	79.17	unknown ppt 1	79.17	No	T2_Spiked_After_Box1_Wz		-
2021-07-08	Spiked	After	1	1	-	Unidentified	Medium	Wizard	1117	57.5	31.6	57.5	31.6	No	No	Unidentified	0	Unidentified	0	No	T2_Spiked_After_Box1_Wz		-
2021-07-08	Spiked	After	1	1	-	Unidentified	Medium	Wizard	1118	158.4	51.7	158.4	51.7	Yes	No	Unidentified	0	Unidentified	0	No	T2_Spiked_After_Box1_Wz		-
2021-07-08	Spiked	After	1	1	-	Natural Material - SPT ppt	Medium	Wizard	1119	77.9	35	77.9	35	No	No	unknown ppt 1	76.05	unknown ppt 1	76.05	No	T2_Spiked_After_Box1_Wz		-
2021-07-08	Spiked	After	1	1	-	Unidentified	Medium	Wizard	1120	80.2	39.7	80.2	39.7	No	No	Unidentified	0	Unidentified	0	No	T2_Spiked_After_Box1_Wz		-
2021-07-08	Spiked	After	1	1	-	Natural Material - SPT ppt	Medium	Wizard	1121	53.5	17	53.5	17	No	No	unknown ppt 1	77.89	unknown ppt 1	77.89	No	T2_Spiked_After_Box1_Wz		-
2021-07-08	Spiked	After	1	1	-	Unidentified	Medium	Wizard	1122	46.8	37.7	46.8	37.7	No	No	Unidentified	0	Unidentified	0	No	T2_Spiked_After_Box1_Wz		-
2021-07-08	Spiked	After	1	1	-	Natural Material - SPT ppt	Medium	Wizard	1123	66.8	43.4	66.8	43.4	No	No	unknown ppt 1	80.17	unknown ppt 1	80.17	No	T2_Spiked_After_Box1_Wz		-
2021-07-08	Spiked	After	1	1	-	Unidentified	Medium	Wizard	1124	46.8	32.8	46.8	32.8	No	No	Unidentified	0	Unidentified	0	No	T2_Spiked_After_Box1_Wz		-
2021-07-08	Spiked	After	1	1	-	Unidentified	Medium	Wizard	1125	127.7	58.3	127.7	58.3	Yes	No	Unidentified	0	Unidentified	0	No	T2_Spiked_After_Box1_Wz		-
2021-07-08	Spiked	After	1	1	-	Natural Material - SPT ppt	Medium	Wizard	1126	207.1	73	207.1	73	Yes	No	unknown ppt 1	78.36	unknown ppt 1	78.36	No	T2_Spiked_After_Box1_Wz		-
2021-07-08	Spiked	After	1	1	-	Natural Material - SPT ppt	Medium	Wizard	1127	60.1	33.1	60.1	33.1	No	No	unknown ppt 1	75.33	unknown ppt 1	75.33	No	T2_Spiked_After_Box1_Wz		-
2021-07-08	Spiked	After	1	1	-	Unidentified	Medium	Wizard	1128	160.4	34.4	160.4	34.4	Yes	No	Unidentified	0	Unidentified	0	No	T2_Spiked_After_Box1_Wz		-
2021-07-08	Spiked	After	1	1	-	Natural Material - SPT ppt	Large	Wizard	1129	1675.1	541.3	1675.1	541.3	Yes	No	unknown ppt 1	75.11	unknown ppt 1	75.11	No	T2_Spiked_After_Box1_Wz		-
2021-07-08	Spiked	After	1	1	-	Natural Material - SPT ppt	Medium	Wizard	1130	57.5	29.7	57.5	29.7	No	No	unknown ppt 1	85.58	unknown ppt 1	85.58	No	T2_Spiked_After_Box1_Wz		-
2021-07-08	Spiked	After	1	1	-	Natural Material - SPT ppt	Medium	Wizard	1131	90.9	46.3	90.9	46.3	No	No	unknown ppt 1	81.81	unknown ppt 1	81.81	No	T2_Spiked_After_Box1_Wz		-
2021-07-08	Spiked	After	1	1	-	Natural Material - SPT ppt	Medium	Wizard	1132	53.5	36.2	53.5	36.2	No	No	unknown ppt 1	84.05	unknown ppt 1	84.05	No	T2_Spiked_After_Box1_Wz		-
2021-07-08	Spiked	After	1	1	-	Natural Material - SPT ppt	Medium	Wizard	1133	160.9	80.9	160.9	80.9	Yes	No	unknown ppt 1	75.41	unknown ppt 1	75.41	No	T2_Spiked_After_Box1_Wz		-
2021-07-08	Spiked	After	1	1	-	Natural Material - SPT ppt	Medium	Wizard	1134	113.6	35	113.6	35	Yes	No	unknown ppt 1	76.55	unknown ppt 1	76.55	No	T2_Spiked_After_Box1_Wz		-
2021-07-08	Spiked	After	1	1	-	Natural Material - SPT ppt	Large	Wizard	1135	400.9	107.1	400.9	107.1	Yes	No	unknown ppt 1	81.58	unknown ppt 1	81.58	No	T2_Spiked_After_Box1_Wz		-
2021-07-08	Spiked	After	1	1	-	Natural Material - SPT ppt	Large	Wizard	1136	429.6	142	429.6	142	Yes	No	unknown ppt 1	76.44	unknown ppt 1	76.44	No	T2_Spiked_After_Box1_Wz		-
2021-07-08	Spiked	After	1	1	-	Natural Material - SPT ppt	Medium	Wizard	1137	124.3	65.4	124.3	65.4	Yes	No	unknown ppt 1	83.98	unknown ppt 1	83.98	No	T2_Spiked_After_Box1_Wz		-
2021-07-08	Spiked	After	1	1	-	Natural Material - SPT ppt	Medium	Wizard	1138	73.5	27.1	73.5	27.1	No	No	unknown ppt 1	82.46	unknown ppt 1	82.46	No	T2_Spiked_After_Box1_Wz		-
2021-07-08	Spiked	After	1	1	-	Unidentified	Large	Wizard	1139	349.8	85.3	349.8	85.3	Yes	No	Unidentified	0	Unidentified	0	No	T2_Spiked_After_Box1_Wz		-
2021-07-08	Spiked	After	1	1	-	Natural Material - SPT ppt	Medium	Wizard	1140	68.8	31.4	68.8	31.4	No	No	unknown ppt 1	81.95	unknown ppt 1	81.95	No	T2_Spiked_After_Box1_Wz		-
2021-07-08	Spiked	After	1	1	-	Natural Material - SPT ppt	Medium	Wizard	1141	86.9	66.1	86.9	66.1	No	No	unknown ppt 1	79.64	unknown ppt 1	79.64	No	T2_Spiked_After_Box1_Wz		-
2021-07-08	Spiked	After	1	1	-	Natural Material - SPT ppt	Medium	Wizard	1142	152.4	67.2	152.4	67.2	Yes	No	unknown ppt 1	75.52	unknown ppt 1	75.52	No	T2_Spiked_After_Box1_Wz		-
2021-07-08	Spiked	After	1	1	-	Natural Material - SPT ppt	Medium	Wizard	1143	46.8	37.7	46.8	37.7	No	No	unknown ppt 1	78.03	unknown ppt 1	78.03	No	T2_Spiked_After_Box1_Wz		-
2021-07-08	Spiked	After	1	1	-	Natural Material - SPT ppt	Medium	Wizard	1144	101.8	72.1	101.8	72.1	Yes	No	unknown ppt 1	76.9	unknown ppt 1	76.9	No	T2_Spiked_After_Box1_Wz		-
2021-07-08	Spiked	After	1	1	-	Unidentified	Medium	Wizard	1145	46.8	31.6	46.8	31.6	No	No	Unidentified	0	Unidentified	0	No	T2_Spiked_After_Box1_Wz		-
2021-07-08	Spiked	After	1	1	-	Unidentified	Medium	Wizard	1146	115	32.1	115	32.1	Yes	No	Unidentified	0	Unidentified	0	No	T2_Spiked_After_Box1_Wz		-
2021-07-08	Spiked	After	1	1	-	Unidentified	Medium	Wizard	1147	66.8	33.2	66.8	33.2	No	No	Unidentified	0	Unidentified	0	No	T2_Spiked_After_Box1_Wz		-
2021-07-08	Spiked	After	1	1	-	Natural Material - SPT ppt	Medium	Wizard	1148	46.8	34	46.8	34	No	No	unknown ppt 1	76.29	unknown ppt 1	76.29	No	T2_Spiked_After_Box1_Wz		-
2021-07-08	Spiked	After	1	1	-	Unidentified	Medium	Wizard	1149	56.7	36.1	56.7	36.1	No	No	Unidentified	0	Unidentified	0	No	T2_Spiked_After_Box1_Wz		-
2021-07-08	Spiked	After	1	1	-	Unidentified	Medium	Wizard	1150	93.5	37.7	93.5	37.7	No	No	Unidentified	0	Unidentified	0	No	T2_Spiked_After_Box1_Wz		-
2021-07-08	Spiked	After	1	1	-	Natural Material - SPT ppt	Large	Wizard	1151	300.7	94.9	300.7	94.9	Yes	No	unknown ppt 1	85.45	unknown ppt 1	85.45	No	T2_Spiked_After_Box1_Wz		-
2021-07-08	Spiked	After	1	1	-	Unidentified	Medium	Wizard	1152	53.9	50.7	53.9	50.7	No	No	Unidentified	0	Unidentified	0	No	T2_Spiked_After_Box1_Wz		-
2021-07-08	Spiked	After	1	1	-	Natural Material - SPT ppt	Medium	Wizard	1153	80.2	36.9	80.2	36.9	No	No	unknown ppt 1	78.61	unknown ppt 1	78.61	No	T2_Spiked_After_Box1_Wz		-
2021-07-08	Spiked	After	1	1	-	Natural Material - SPT ppt	Medium	Wizard	1154	52.2	16.3	52.2	16.3	No	No	unknown ppt 1	82.23	unknown ppt 1	82.23	No	T2_Spiked_After_Box1_Wz		-
2021-07-08	Spiked	After	1	1	-	Natural Material - SPT ppt	Medium	Wizard	1155	96.4	34.2	96.4	34.2	No	No	unknown ppt 1	86.95	unknown ppt 1	86.95	No	T2_Spiked_After_Box1_Wz		-
2021-07-08	Spiked	After	1	1	-	Natural Material - SPT ppt	Medium	Wizard	1156	106.9	68.6	106.9	68.6	Yes	No	unknown ppt 1	85.7	unknown ppt 1	85.7	No	T2_Spiked_After_Box1_Wz		-
2021-07-08	Spiked	After	1	1	-	Natural Material - SPT ppt	Large	Wizard	1157	432.1	105.9	432.1	105.9	Yes	No	unknown ppt 1	86.19	unknown ppt 1	86.19	No	T2_Spiked_After_Box1_Wz		-
2021-07-08	Spiked	After	1	1	-	Natural Material - SPT ppt	Large	Wizard	1158	379.9	89.6	379.9	89.6	Yes	No	unknown ppt 1	84.65	unknown ppt 1	84.65	No	T2_Spiked_After_Box1_Wz		-
2021-07-08	Spiked	After	1	1	-	Natural Material - SPT ppt	Medium	Wizard	1159	46.8	28	46.8	28	No	No	unknown ppt 1	85.09	unknown ppt 1	85.09	No	T2_Spiked_After_Box1_Wz		-
2021-07-08	Spiked	After	1	1	-	Unidentified	Medium	Wizard	1160	235	109.3	235	109.3	Yes	No	Unidentified	0	Unidentified	0	No	T2_Spiked_After_Box1_Wz		-
2021-07-08	Spiked	After	1	1	-	Natural Material - SPT ppt	Medium	Wizard	1161	48.2	34.2	48.2	34.2	No	No	unknown ppt 1	76.25	unknown ppt 1	76.25	No	T2_Spiked_After_Box1_Wz		-
2021-07-08	Spiked	After	1	1	-	Natural Material - SPT ppt	Medium	Wizard	1162	57.5	31.6	57.5	31.6	No	No	unknown ppt 1	76.84	unknown ppt 1	76.84	No	T2_Spiked_After_Box1_Wz		-
2021-07-08	Spiked	After	1	1	-	Natural Material - SPT ppt	Large	Wizard	1163	400.9	98.8	400.9	98.8	Yes	No	unknown ppt 1	82.22	unknown ppt 1	82.22	No	T2_Spiked_After_Box1_Wz		-
2021-07-08	Spiked	After	1	1	-	Unidentified	Medium	Wizard	1164	99.3	34.9	99.3	34.9	No	No	Unidentified	0	Unidentified	0	No	T2_Spiked_After_Box1_Wz		-
2021-07-08	Spiked	After	1	1	-	Unidentified	Medium	Wizard	1165	53.9	20	53.9	20	No	No	Unidentified	0	Unidentified	0	No	T2_Spiked_After_Box1_Wz		-
2021-07-08	Spiked	After	1	1	-	Unidentified	Large	Wizard	1166	664.6	177.2	664.6	177.2	Yes	No	Unidentified	0	Unidentified	0	No	T2_Spiked_After_Box1_Wz		-
2021-07-08	Spiked	After	1	1	-	Natural Material - SPT ppt	Large	Wizard	1167	307.4	116.3	307.4	116.3	Yes	No	unknown ppt 1	84.22	unknown ppt 1	84.22	No	T2_Spiked_After_Box1_Wz		-
2021-07-08	Spiked	After	1	1	-	Natural Material - SPT ppt	Medium	Wizard	1168	63	33.4	63	33.4	No	No	unknown ppt 1	75.66	unknown ppt 1	75.66	No	T2_Spiked_After_Box1_Wz		-
2021-07-08	Spiked	After	1	1	-	Natural Material - SPT ppt	Medium	Wizard	1169	80.2	30.5	80.2	30.5	No	No	unknown ppt 1	77.64	unknown ppt 1	77.64	No	T2_Spiked_After_Box1_Wz		-
2021-07-08	Spiked	After	1	1	-	Natural Material - SPT ppt	Medium	Wizard	1170	66.8	54.4	66.8	54.4	No	No	unknown ppt 1	81.67	unknown ppt 1	81.67	No	T2_Spiked_After_Box1_Wz		-
2021-07-08	Spiked	After	1	1	-	Natural Material - SPT ppt	Medium	Wizard	1171	53.5	21.3	53.5	21.3	No	No	unknown ppt 1	79.19	unknown ppt 1	79.19	No	T2_Spiked_After_Box1_Wz		-
2021-07-08	Spiked	After	1	1	-	Unidentified	Large	Wizard	1172	332.3	79.7	332.3	79.7	Yes	No	Unidentified	0	Unidentified	0	No	T2_Spiked_After_Box1_Wz		-
2021-07-08	Spiked	After	1	1	-	Unidentified	Medium	Wizard	1173	60.1	20.8	60.1	20.8	No	No	Unidentified	0	Unidentified	0	No	T2_Spiked_After_Box1_Wz		-
2021-07-08	Spiked	After	1	1	-	Natural Material - Crumb Rubber Changed	Medium	Wizard	1174	46.8	35.2	46.8	35.2	No	No	CR300PLUS_7	77.87	CR300PLUS_7	77.87	No	T2_Spiked_After_Box1_Wz	very light particle, may be broken from large CR particle	no
2021-07-08	Spiked	After	1	1	-	Natural Material - SPT ppt	Medium	Wizard	1175	66.8	28.1	66.8	28.1	No	No	unknown ppt 1	79.71	unknown ppt 1	79.71	No	T2_Spiked_After_Box1_Wz		-
2021-07-08	Spiked	After	1	1	-	Natural Material - Crumb Rubber Changed	Medium	Wizard	1176	218.2	74.3	105.35	49.13	Yes	No	CRUMBRUBBER300PLUS_1	78.82	CRUMBRUBBER300PLUS_1	78.82	yes	T2_Spiked_After_Box1_Wz	very light particle, unsure weather to count or not	no
2021-07-08	Spiked	After	1	1	-	Natural Material - SPT ppt	Medium	Wizard	1177	120.3	50.1	120.3	50.1	Yes	No	unknown ppt 1	80.34	unknown ppt 1	80.34	No	T2_Spiked_After_Box1_Wz		-
2021-07-08	Spiked	After	1	1	-	Natural Material - SPT ppt	Medium	Wizard	1178	93.5	32.8	93.5	32.8	No	No	unknown ppt 1	86.11	unknown ppt 1	86.11	No	T2_Spiked_After_Box1_Wz		-
2021-07-08	Spiked	After	1	1	-	Natural Material - SPT ppt	Medium	Wizard	1179	260.6	97.7	260.6	97.7	Yes	No	unknown ppt 1	78.17	unknown ppt 1	78.17	No	T2_Spiked_After_Box1_Wz		-
2021-07-08	Spiked	After	1	1	-	Natural Material - SPT ppt	Medium	Wizard	1180	53.5	26.6	53.5	26.6	No	No	unknown ppt 1	82.1	unknown ppt 1	82.1	No	T2_Spiked_After_Box1_Wz		-
2021-07-08	Spiked	After	1	1	-	Natural Material - SPT ppt	Medium	Wizard	1181	60.1	31.2	60.1	31.2	No	No	unknown ppt 1	84.12	unknown ppt 1	84.12	No	T2_Spiked_After_Box1_Wz		-
2021-07-08	Spiked	After	1	1	-	Natural Material - SPT ppt	Medium	Wizard	1182	81.6	34.2	81.6	34.2	No	No	unknown ppt 1	86.78	unknown ppt 1	86.78	No	T2_Spiked_After_Box1_Wz		-
2021-07-08	Spiked	After	1	1	-	Natural Material - SPT ppt	Medium	Wizard	1183	153.7	55.1	153.7	55.1	Yes	No	unknown ppt 1	78.84	unknown ppt 1	78.84	No	T2_Spiked_After_Box1_Wz		-
2021-07-08	Spiked	After	1	1	-	Natural Material - SPT ppt	Medium	Wizard	1184	106.9	64.9	106.9	64.9	Yes	No	unknown ppt 1	79.38	unknown ppt 1	79.38	No	T2_Spiked_After_Box1_Wz		-
2021-07-08	Spiked	After	1	1	-	Natural Material - SPT ppt	Medium	Wizard	1185	188.3	64.9	188.3	64.9	Yes	No	unknown ppt 1	93.79	unknown ppt 1	93.79	No	T2_Spiked_After_Box1_Wz		-
2021-07-08	Spiked	After	1	1	-	Unidentified	Large	Wizard	1186	441.5	142.7	441.5	142.7	Yes	No	Unidentified	0	Unidentified	0	No	T2_Spiked_After_Box1_Wz		-
2021-07-08	Spiked	After	1	1	-	Unidentified	Medium	Wizard	1187	153.7	60.7	153.7	60.7	Yes	No	Unidentified	0	Unidentified	0	No	T2_Spiked_After_Box1_Wz		-
2021-07-08	Spiked	After	1	1	-	Natural Material - Crumb Rubber Changed	Medium	Wizard	1188	66.8	45.9	66.8	45.9	No	No	CR300PLUS_7	75.9	CR300PLUS_7	75.9	No	T2_Spiked_After_Box1_Wz	white/light particle identified, definitly not the color of crumb rubber	no
2021-07-08	Spiked	After	1	1	-	Unidentified	Medium	Wizard	1189	150.2	71.6	150.2	71.6	Yes	No	Unidentified	0	Unidentified	0	No	T2_Spiked_After_Box1_Wz		-
2021-07-08	Spiked	After	1	1	-	Unidentified	Medium	Wizard	1190	60.1	36.9	60.1	36.9	No	No	Unidentified	0	Unidentified	0	No	T2_Spiked_After_Box1_Wz		-
2021-07-08	Spiked	After	1	1	-	Natural Material - SPT ppt	Medium	Wizard	1191	60.1	15.1	60.1	15.1	No	No	unknown ppt 1	87.69	unknown ppt 1	87.69	No	T2_Spiked_After_Box1_Wz		-
2021-07-08	Spiked	After	1	1	-	Natural Material - SPT ppt	Medium	Wizard	1192	53.5	29.8	53.5	29.8	No	No	unknown ppt 1	75.8	unknown ppt 1	75.8	No	T2_Spiked_After_Box1_Wz		-
2021-07-08	Spiked	After	1	1	-	Natural Material - SPT ppt	Medium	Wizard	1193	73.5	51.8	73.5	51.8	No	No	unknown ppt 1	79.51	unknown ppt 1	79.51	No	T2_Spiked_After_Box1_Wz		-
2021-07-08	Spiked	After	1	1	-	Natural Material - SPT ppt	Large	Wizard	1194	417.2	149.1	417.2	149.1	Yes	No	unknown ppt 1	79.22	unknown ppt 1	79.22	No	T2_Spiked_After_Box1_Wz		-
2021-07-08	Spiked	After	1	1	-	Unidentified	Medium	Wizard	1195	181.8	65.1	181.8	65.1	Yes	No	Unidentified	0	Unidentified	0	No	T2_Spiked_After_Box1_Wz		-
2021-07-08	Spiked	After	1	1	-	Natural Material - SPT ppt	Medium	Wizard	1196	207.1	87.8	207.1	87.8	Yes	No	unknown ppt 1	76.45	unknown ppt 1	76.45	No	T2_Spiked_After_Box1_Wz		-
2021-07-08	Spiked	After	1	1	-	Unidentified	Medium	Wizard	1197	100.2	80	100.2	80	Yes	No	Unidentified	0	Unidentified	0	No	T2_Spiked_After_Box1_Wz		-
2021-07-08	Spiked	After	1	1	-	Natural Material - SPT ppt	Medium	Wizard	1198	77.9	37.2	77.9	37.2	No	No	unknown ppt 1	81.27	unknown ppt 1	81.27	No	T2_Spiked_After_Box1_Wz		-
2021-07-08	Spiked	After	1	1	-	Natural Material - SPT ppt	Medium	Wizard	1199	60.1	30.2	60.1	30.2	No	No	unknown ppt 1	76.2	unknown ppt 1	76.2	No	T2_Spiked_After_Box1_Wz		-
2021-07-08	Spiked	After	1	1	-	Natural Material - SPT ppt	Medium	Wizard	1200	228.6	133.3	228.6	133.3	Yes	No	unknown ppt 1	78.95	unknown ppt 1	78.95	No	T2_Spiked_After_Box1_Wz		-
2021-07-08	Spiked	After	1	1	-	Natural Material - SPT ppt	Medium	Wizard	1201	76.2	22.4	76.2	22.4	No	No	unknown ppt 1	82.37	unknown ppt 1	82.37	No	T2_Spiked_After_Box1_Wz		-
2021-07-08	Spiked	After	1	1	-	Unidentified	Medium	Wizard	1202	173.7	34	173.7	34	Yes	No	Unidentified	0	Unidentified	0	No	T2_Spiked_After_Box1_Wz		-
2021-07-08	Spiked	After	1	1	-	Unidentified	Large	Wizard	1203	334.1	120.5	334.1	120.5	Yes	No	Unidentified	0	Unidentified	0	No	T2_Spiked_After_Box1_Wz		-
2021-07-08	Spiked	After	1	1	-	Natural Material - SPT ppt	Medium	Wizard	1204	48.2	40.1	48.2	40.1	No	No	unknown ppt 1	80.77	unknown ppt 1	80.77	No	T2_Spiked_After_Box1_Wz		-
2021-07-08	Spiked	After	1	1	-	Natural Material - SPT ppt	Medium	Wizard	1205	87.1	60	87.1	60	No	No	unknown ppt 1	75.74	unknown ppt 1	75.74	No	T2_Spiked_After_Box1_Wz		-
2021-07-08	Spiked	After	1	1	-	Natural Material - SPT ppt	Medium	Wizard	1206	60.1	38.8	60.1	38.8	No	No	unknown ppt 1	77.14	unknown ppt 1	77.14	No	T2_Spiked_After_Box1_Wz		-
2021-07-08	Spiked	After	1	1	-	Natural Material - SPT ppt	Medium	Wizard	1207	100.2	61.3	100.2	61.3	Yes	No	unknown ppt 1	76.39	unknown ppt 1	76.39	No	T2_Spiked_After_Box1_Wz		-
2021-07-08	Spiked	After	1	1	-	Unidentified	Medium	Wizard	1208	53.5	35.1	53.5	35.1	No	No	Unidentified	0	Unidentified	0	No	T2_Spiked_After_Box1_Wz		-
2021-07-08	Spiked	After	1	1	-	Natural Material - SPT ppt	Medium	Wizard	1209	259.5	100.3	259.5	100.3	Yes	No	unknown ppt 1	84.23	unknown ppt 1	84.23	No	T2_Spiked_After_Box1_Wz		-
2021-07-08	Spiked	After	1	1	-	Unidentified	Medium	Wizard	1210	53.5	25.5	53.5	25.5	No	No	Unidentified	0	Unidentified	0	No	T2_Spiked_After_Box1_Wz		-
2021-07-08	Spiked	After	1	1	-	Unidentified	Medium	Wizard	1211	120.5	89.7	120.5	89.7	Yes	No	Unidentified	0	Unidentified	0	No	T2_Spiked_After_Box1_Wz		-
2021-07-08	Spiked	After	1	1	-	Unidentified	Medium	Wizard	1212	86.9	47.8	86.9	47.8	No	No	Unidentified	0	Unidentified	0	No	T2_Spiked_After_Box1_Wz		-
2021-07-08	Spiked	After	1	1	-	Natural Material - SPT ppt	Medium	Wizard	1213	46.8	38.9	46.8	38.9	No	No	unknown ppt 1	80.24	unknown ppt 1	80.24	No	T2_Spiked_After_Box1_Wz		-
2021-07-08	Spiked	After	1	1	-	Unidentified	Medium	Wizard	1214	87.1	47	87.1	47	No	No	Unidentified	0	Unidentified	0	No	T2_Spiked_After_Box1_Wz		-
2021-07-08	Spiked	After	1	1	-	Natural Material - SPT ppt	Large	Wizard	1215	400.9	128.3	400.9	128.3	Yes	No	unknown ppt 1	80.25	unknown ppt 1	80.25	No	T2_Spiked_After_Box1_Wz		-
2021-07-08	Spiked	After	1	1	-	Natural Material - SPT ppt	Medium	Wizard	1216	46.8	25.5	46.8	25.5	No	No	unknown ppt 1	82.27	unknown ppt 1	82.27	No	T2_Spiked_After_Box1_Wz		-
2021-07-08	Spiked	After	1	1	-	Natural Material - SPT ppt	Large	Wizard	1217	437.7	214	437.7	214	Yes	No	unknown ppt 1	89.29	unknown ppt 1	89.29	No	T2_Spiked_After_Box1_Wz		-
2021-07-08	Spiked	After	1	1	-	Natural Material - SPT ppt	Medium	Wizard	1218	278.1	117.7	278.1	117.7	Yes	No	unknown ppt 1	87.9	unknown ppt 1	87.9	No	T2_Spiked_After_Box1_Wz		-
2021-07-08	Spiked	After	1	1	-	Natural Material - SPT ppt	Medium	Wizard	1219	60.1	42.5	60.1	42.5	No	No	unknown ppt 1	78.51	unknown ppt 1	78.51	No	T2_Spiked_After_Box1_Wz		-
2021-07-08	Spiked	After	1	1	-	Natural Material - SPT ppt	Medium	Wizard	1220	46.8	31.6	46.8	31.6	No	No	unknown ppt 1	83.42	unknown ppt 1	83.42	No	T2_Spiked_After_Box1_Wz		-
2021-07-08	Spiked	After	1	1	-	Unidentified	Medium	Wizard	1221	63	56.8	63	56.8	No	No	Unidentified	0	Unidentified	0	No	T2_Spiked_After_Box1_Wz		-
2021-07-08	Spiked	After	1	1	-	CR	Large	Wizard	1222	648.2	279.4	648.2	279.4	Yes	No	CR_sedimentproject*2	79.6	CR_sedimentproject*2	79.6	No	T2_Spiked_After_Box1_Wz		yes
2021-07-08	Spiked	After	1	1	-	Natural Material - SPT ppt	Large	Wizard	1223	391	156	391	156	Yes	No	unknown ppt 1	86.05	unknown ppt 1	86.05	No	T2_Spiked_After_Box1_Wz		-
2021-07-08	Spiked	After	1	1	-	Natural Material - SPT ppt	Medium	Wizard	1224	80.2	48.9	80.2	48.9	No	No	unknown ppt 1	83.26	unknown ppt 1	83.26	No	T2_Spiked_After_Box1_Wz		-
2021-07-08	Spiked	After	1	1	-	Natural Material - SPT ppt	Medium	Wizard	1225	230.4	93.3	230.4	93.3	Yes	No	unknown ppt 1	84.15	unknown ppt 1	84.15	No	T2_Spiked_After_Box1_Wz		-
2021-07-08	Spiked	After	1	1	-	Natural Material	Large	Wizard	1226	401.1	161.8	401.1	161.8	Yes	No	NYLON6300PLUS_6	85.15	NYLON6300PLUS_6	85.15	No	T2_Spiked_After_Box1_Wz		yes
2021-07-08	Spiked	After	1	1	-	Unidentified	Medium	Wizard	1227	53.9	34.8	53.9	34.8	No	No	Unidentified	0	Unidentified	0	No	T2_Spiked_After_Box1_Wz		-
2021-07-08	Spiked	After	1	1	-	Unidentified	Medium	Wizard	1228	173.7	74	173.7	74	Yes	No	Unidentified	0	Unidentified	0	No	T2_Spiked_After_Box1_Wz		-
2021-07-08	Spiked	After	1	1	-	Natural Material - SPT ppt	Medium	Wizard	1229	237.3	89.8	237.3	89.8	Yes	No	unknown ppt 1	80.74	unknown ppt 1	80.74	No	T2_Spiked_After_Box1_Wz		-
2021-07-08	Spiked	After	1	1	-	Natural Material - SPT ppt	Medium	Wizard	1230	167	85.4	167	85.4	Yes	No	unknown ppt 1	86.64	unknown ppt 1	86.64	No	T2_Spiked_After_Box1_Wz		-
2021-07-08	Spiked	After	1	1	-	Natural Material - SPT ppt	Medium	Wizard	1231	113.6	55	113.6	55	Yes	No	unknown ppt 1	79.51	unknown ppt 1	79.51	No	T2_Spiked_After_Box1_Wz		-
2021-07-08	Spiked	After	1	1	-	Natural Material - SPT ppt	Medium	Wizard	1232	187.1	46.5	187.1	46.5	Yes	No	unknown ppt 1	77.11	unknown ppt 1	77.11	No	T2_Spiked_After_Box1_Wz		-
2021-07-08	Spiked	After	1	1	-	Unidentified	Medium	Wizard	1233	80.2	45.4	80.2	45.4	No	No	Unidentified	0	Unidentified	0	No	T2_Spiked_After_Box1_Wz		-
2021-07-08	Spiked	After	1	1	-	Unidentified	Medium	Wizard	1234	227.2	70.8	227.2	70.8	Yes	No	Unidentified	0	Unidentified	0	No	T2_Spiked_After_Box1_Wz		-
2021-07-08	Spiked	After	1	1	-	Natural Material - SPT ppt	Large	Wizard	1235	358.6	134.6	358.6	134.6	Yes	No	unknown ppt 1	86.04	unknown ppt 1	86.04	No	T2_Spiked_After_Box1_Wz		-
2021-07-08	Spiked	After	1	1	-	Unidentified	Medium	Wizard	1236	98.7	51.9	98.7	51.9	No	No	Unidentified	0	Unidentified	0	No	T2_Spiked_After_Box1_Wz		-
2021-07-08	Spiked	After	1	1	-	Natural Material - SPT ppt	Medium	Wizard	1237	100.2	68.1	100.2	68.1	Yes	No	unknown ppt 1	78.96	unknown ppt 1	78.96	No	T2_Spiked_After_Box1_Wz		-
2021-07-08	Spiked	After	1	1	-	Natural Material - SPT ppt	Medium	Wizard	1238	107.9	43.7	107.9	43.7	Yes	No	unknown ppt 1	83.12	unknown ppt 1	83.12	No	T2_Spiked_After_Box1_Wz		-
2021-07-08	Spiked	After	1	1	-	Natural Material - SPT ppt	Medium	Wizard	1239	80.2	48.9	80.2	48.9	No	No	unknown ppt 1	76.49	unknown ppt 1	76.49	No	T2_Spiked_After_Box1_Wz		-
2021-07-08	Spiked	After	1	1	-	Natural Material - SPT ppt	Medium	Wizard	1240	80.2	34	80.2	34	No	No	unknown ppt 1	81.11	unknown ppt 1	81.11	No	T2_Spiked_After_Box1_Wz		-
2021-07-08	Spiked	After	1	1	-	Unidentified	Medium	Wizard	1241	68.8	28.9	68.8	28.9	No	No	Unidentified	0	Unidentified	0	No	T2_Spiked_After_Box1_Wz		-
2021-07-08	Spiked	After	1	1	-	Natural Material - SPT ppt	Medium	Wizard	1242	86.9	39.9	86.9	39.9	No	No	unknown ppt 1	75.66	unknown ppt 1	75.66	No	T2_Spiked_After_Box1_Wz		-
2021-07-08	Spiked	After	1	1	-	Natural Material - SPT ppt	Medium	Wizard	1243	113.6	52.5	113.6	52.5	Yes	No	unknown ppt 1	81.43	unknown ppt 1	81.43	No	T2_Spiked_After_Box1_Wz		-
2021-07-08	Spiked	After	1	1	-	HDPE	Large	Wizard	1244	1936.9	645.9	1936.9	645.9	Yes	No	LDPE_GF_PELLET_SS6_1	97.95	LDPE_GF_PELLET_SS6_1	97.95	No	T2_Spiked_After_Box1_Wz	same as box 2 # 986 (removed box 2 #986)	yes
2021-07-08	Spiked	After	1	1	-	Natural Material - SPT ppt	Medium	Wizard	1245	72.3	51.9	72.3	51.9	No	No	unknown ppt 1	89.9	unknown ppt 1	89.9	No	T2_Spiked_After_Box1_Wz		-
2021-07-08	Spiked	After	1	1	-	Natural Material - SPT ppt	Medium	Wizard	1246	80.2	45.4	80.2	45.4	No	No	unknown ppt 1	81.23	unknown ppt 1	81.23	No	T2_Spiked_After_Box1_Wz		-
2021-07-08	Spiked	After	1	1	-	Natural Material - SPT ppt	Medium	Wizard	1247	133.6	64.2	133.6	64.2	Yes	No	unknown ppt 1	77.23	unknown ppt 1	77.23	No	T2_Spiked_After_Box1_Wz		-
2021-07-08	Spiked	After	1	1	-	Natural Material - SPT ppt	Medium	Wizard	1248	80.2	31.2	80.2	31.2	No	No	unknown ppt 3	86.61	unknown ppt 3	86.61	No	T2_Spiked_After_Box1_Wz		-
2021-07-08	Spiked	After	1	1	-	Unidentified	Medium	Wizard	1249	211.3	42	211.3	42	Yes	No	Unidentified	0	Unidentified	0	No	T2_Spiked_After_Box1_Wz		-
2021-07-08	Spiked	After	1	1	-	Unidentified	Medium	Wizard	1250	77.9	62	77.9	62	No	No	Unidentified	0	Unidentified	0	No	T2_Spiked_After_Box1_Wz		-
2021-07-08	Spiked	After	1	1	-	Natural Material - SPT ppt	Medium	Wizard	1251	120.5	39.6	120.5	39.6	Yes	No	unknown ppt 1	75.7	unknown ppt 1	75.7	No	T2_Spiked_After_Box1_Wz		-
2021-07-08	Spiked	After	1	1	-	Natural Material - SPT ppt	Medium	Wizard	1252	168.6	81.2	168.6	81.2	Yes	No	unknown ppt 1	84.62	unknown ppt 1	84.62	No	T2_Spiked_After_Box1_Wz		-
2021-07-08	Spiked	After	1	1	-	Unidentified	Medium	Wizard	1253	74.7	44.9	74.7	44.9	No	No	Unidentified	0	Unidentified	0	No	T2_Spiked_After_Box1_Wz		-
2021-07-08	Spiked	After	1	1	-	Natural Material - SPT ppt	Medium	Wizard	1254	153.7	53.6	153.7	53.6	Yes	No	unknown ppt 1	78.77	unknown ppt 1	78.77	No	T2_Spiked_After_Box1_Wz		-
2021-07-08	Spiked	After	1	1	-	Unidentified	Medium	Wizard	1255	160.4	36.9	160.4	36.9	Yes	No	Unidentified	0	Unidentified	0	No	T2_Spiked_After_Box1_Wz		-
2021-07-08	Spiked	After	1	1	-	Natural Material - SPT ppt	Medium	Wizard	1256	180.4	44.4	180.4	44.4	Yes	No	unknown ppt 1	83.65	unknown ppt 1	83.65	No	T2_Spiked_After_Box1_Wz		-
2021-07-08	Spiked	After	1	1	-	Natural Material - SPT ppt	Medium	Wizard	1257	48.2	27.1	48.2	27.1	No	No	unknown ppt 1	89.88	unknown ppt 1	89.88	No	T2_Spiked_After_Box1_Wz		-
2021-07-08	Spiked	After	1	1	-	Natural Material - SPT ppt	Medium	Wizard	1258	125.5	49.8	125.5	49.8	Yes	No	unknown ppt 1	79.25	unknown ppt 1	79.25	No	T2_Spiked_After_Box1_Wz		-
2021-07-08	Spiked	After	1	1	-	Natural Material - SPT ppt	Medium	Wizard	1259	46.8	20.7	46.8	20.7	No	No	unknown ppt 1	88.53	unknown ppt 1	88.53	No	T2_Spiked_After_Box1_Wz		-
2021-07-08	Spiked	After	1	1	-	Natural Material - SPT ppt	Medium	Wizard	1260	63	42.4	63	42.4	No	No	unknown ppt 1	79.78	unknown ppt 1	79.78	No	T2_Spiked_After_Box1_Wz		-
2021-07-08	Spiked	After	1	1	-	Natural Material - SPT ppt	Large	Wizard	1261	818.1	160.5	818.1	160.5	Yes	No	unknown ppt 1	86.93	unknown ppt 1	86.93	No	T2_Spiked_After_Box1_Wz		-
2021-07-08	Spiked	After	1	1	-	Unidentified	Large	Wizard	1262	386.2	117.5	386.2	117.5	Yes	No	Unidentified	0	Unidentified	0	No	T2_Spiked_After_Box1_Wz		-
2021-07-08	Spiked	After	1	1	-	Natural Material - SPT ppt	Large	Wizard	1263	390.3	115.8	390.3	115.8	Yes	No	unknown ppt 1	88.66	unknown ppt 1	88.66	No	T2_Spiked_After_Box1_Wz		-
2021-07-08	Spiked	After	1	1	-	Natural Material - SPT ppt	Medium	Wizard	1264	60.1	44.4	60.1	44.4	No	No	unknown ppt 1	81.03	unknown ppt 1	81.03	No	T2_Spiked_After_Box1_Wz		-
2021-07-08	Spiked	After	1	1	-	Natural Material - SPT ppt	Medium	Wizard	1265	60.1	32.1	60.1	32.1	No	No	unknown ppt 1	80.13	unknown ppt 1	80.13	No	T2_Spiked_After_Box1_Wz		-
2021-07-08	Spiked	After	1	1	-	Unidentified	Medium	Wizard	1266	274	60	274	60	Yes	No	Unidentified	0	Unidentified	0	No	T2_Spiked_After_Box1_Wz		-
2021-07-08	Spiked	After	1	1	-	Natural Material - cellulosic	Large	Wizard	1267	381.3	126.7	381.3	126.7	Yes	No	OrangeCottonLabCoat4	78	OrangeCottonLabCoat4	78	No	T2_Spiked_After_Box1_Wz	not orange. not a Fiber, cellulostic natural material	-
2021-07-08	Spiked	After	1	1	-	Natural Material - SPT ppt	Medium	Wizard	1268	281	67.6	281	67.6	Yes	No	unknown ppt 1	82.99	unknown ppt 1	82.99	No	T2_Spiked_After_Box1_Wz		-
2021-07-08	Spiked	After	1	1	-	Unidentified	Medium	Wizard	1269	86.9	51	86.9	51	No	No	Unidentified	0	Unidentified	0	No	T2_Spiked_After_Box1_Wz		-
2021-07-08	Spiked	After	1	1	-	Natural Material - SPT ppt	Medium	Wizard	1270	60.1	29.3	60.1	29.3	No	No	unknown ppt 1	77.21	unknown ppt 1	77.21	No	T2_Spiked_After_Box1_Wz		-
2021-07-08	Spiked	After	1	1	-	Unidentified	Medium	Wizard	1271	120.3	34.5	120.3	34.5	Yes	No	Unidentified	0	Unidentified	0	No	T2_Spiked_After_Box1_Wz		-
2021-07-08	Spiked	After	1	1	-	Unidentified	Medium	Wizard	1272	60.1	35	60.1	35	No	No	Unidentified	0	Unidentified	0	No	T2_Spiked_After_Box1_Wz		-
2021-07-08	Spiked	After	1	1	-	Natural Material - SPT ppt	Medium	Wizard	1273	66.8	43.4	66.8	43.4	No	No	unknown ppt 1	75.11	unknown ppt 1	75.11	No	T2_Spiked_After_Box1_Wz		-
2021-07-08	Spiked	After	1	1	-	Unidentified	Medium	Wizard	1274	73.5	38.7	73.5	38.7	No	No	Unidentified	0	Unidentified	0	No	T2_Spiked_After_Box1_Wz		-
2021-07-08	Spiked	After	1	1	-	Natural Material - SPT ppt	Medium	Wizard	1275	240.5	62.2	240.5	62.2	Yes	No	unknown ppt 1	79.17	unknown ppt 1	79.17	No	T2_Spiked_After_Box1_Wz		-
2021-07-08	Spiked	After	1	1	-	Natural Material - SPT ppt	Medium	Wizard	1276	66.8	24.7	66.8	24.7	No	No	unknown ppt 1	77.05	unknown ppt 1	77.05	No	T2_Spiked_After_Box1_Wz		-
2021-07-08	Spiked	After	1	1	-	Natural Material - SPT ppt	Medium	Wizard	1277	53.5	22.3	53.5	22.3	No	No	unknown ppt 1	88.65	unknown ppt 1	88.65	No	T2_Spiked_After_Box1_Wz		-
2021-07-08	Spiked	After	1	1	-	Natural Material - SPT ppt	Large	Wizard	1278	307.7	86.5	307.7	86.5	Yes	No	unknown ppt 1	84.46	unknown ppt 1	84.46	No	T2_Spiked_After_Box1_Wz		-
2021-07-08	Spiked	After	1	1	-	Natural Material - SPT ppt	Large	Wizard	1279	1033.6	279	1033.6	279	Yes	No	unknown ppt 1	79.18	unknown ppt 1	79.18	No	T2_Spiked_After_Box1_Wz		-
2021-07-08	Spiked	After	1	1	-	Natural Material - SPT ppt	Medium	Wizard	1280	81.6	46.7	81.6	46.7	No	No	unknown ppt 1	83.49	unknown ppt 1	83.49	No	T2_Spiked_After_Box1_Wz		-
2021-07-08	Spiked	After	1	1	-	Natural Material - SPT ppt	Medium	Wizard	1281	66.8	27.2	66.8	27.2	No	No	unknown ppt 1	75.47	unknown ppt 1	75.47	No	T2_Spiked_After_Box1_Wz		-
2021-07-08	Spiked	After	1	1	-	Unidentified	Medium	Wizard	1282	60.1	36.9	60.1	36.9	No	No	Unidentified	0	Unidentified	0	No	T2_Spiked_After_Box1_Wz		-
2021-07-08	Spiked	After	1	1	-	Natural Material - SPT ppt	Medium	Wizard	1283	52.2	26.1	52.2	26.1	No	No	unknown ppt 1	85.01	unknown ppt 1	85.01	No	T2_Spiked_After_Box1_Wz		-
2021-07-08	Spiked	After	1	1	-	Unidentified	Large	Wizard	1284	337.7	66.5	337.7	66.5	Yes	No	Unidentified	0	Unidentified	0	No	T2_Spiked_After_Box1_Wz		-
2021-07-08	Spiked	After	1	1	-	Unidentified	Medium	Wizard	1285	120.3	36.9	120.3	36.9	Yes	No	Unidentified	0	Unidentified	0	No	T2_Spiked_After_Box1_Wz		-
2021-07-08	Spiked	After	1	1	-	Unidentified	Medium	Wizard	1286	173.7	62.2	173.7	62.2	Yes	No	Unidentified	0	Unidentified	0	No	T2_Spiked_After_Box1_Wz		-
2021-07-08	Spiked	After	1	1	-	Unidentified	Medium	Wizard	1287	80.2	43.2	80.2	43.2	No	No	Unidentified	0	Unidentified	0	No	T2_Spiked_After_Box1_Wz		-
2021-07-08	Spiked	After	1	1	-	Natural Material - SPT ppt	Medium	Wizard	1288	60.1	33.1	60.1	33.1	No	No	unknown ppt 1	76.05	unknown ppt 1	76.05	No	T2_Spiked_After_Box1_Wz		-
2021-07-08	Spiked	After	1	1	-	Natural Material - SPT ppt	Medium	Wizard	1289	104.6	42.9	104.6	42.9	Yes	No	unknown ppt 1	75.36	unknown ppt 1	75.36	No	T2_Spiked_After_Box1_Wz		-
2021-07-08	Spiked	After	1	1	-	Unidentified	Large	Wizard	1290	406.8	127	406.8	127	Yes	No	Unidentified	0	Unidentified	0	No	T2_Spiked_After_Box1_Wz		-
2021-07-08	Spiked	After	1	1	-	Natural Material - SPT ppt	Medium	Wizard	1291	155.8	71.5	155.8	71.5	Yes	No	unknown ppt 1	76.01	unknown ppt 1	76.01	No	T2_Spiked_After_Box1_Wz		-
2021-07-08	Spiked	After	1	1	-	Natural Material - SPT ppt	Medium	Wizard	1292	98.7	34.6	98.7	34.6	No	No	unknown ppt 1	78.16	unknown ppt 1	78.16	No	T2_Spiked_After_Box1_Wz		-
2021-07-08	Spiked	After	1	1	-	Unidentified	Medium	Wizard	1293	68.8	40.5	68.8	40.5	No	No	Unidentified	0	Unidentified	0	No	T2_Spiked_After_Box1_Wz		-
2021-07-08	Spiked	After	1	1	-	Unidentified	Medium	Wizard	1294	86.9	38	86.9	38	No	No	Unidentified	0	Unidentified	0	No	T2_Spiked_After_Box1_Wz		-
2021-07-08	Spiked	After	1	1	-	Natural Material - SPT ppt	Medium	Wizard	1295	60.1	45.4	60.1	45.4	No	No	unknown ppt 1	77.33	unknown ppt 1	77.33	No	T2_Spiked_After_Box1_Wz		-
2021-07-08	Spiked	After	1	1	-	Natural Material - SPT ppt	Large	Wizard	1296	1329.7	185.6	1329.7	185.6	Yes	No	unknown ppt 1	86.87	unknown ppt 1	86.87	No	T2_Spiked_After_Box1_Wz		-
2021-07-08	Spiked	After	1	1	-	Natural Material - SPT ppt	Medium	Wizard	1297	114.2	74.2	114.2	74.2	Yes	No	unknown ppt 1	77.61	unknown ppt 1	77.61	No	T2_Spiked_After_Box1_Wz		-
2021-07-08	Spiked	After	1	1	-	Natural Material - SPT ppt	Medium	Wizard	1298	73.5	32.5	73.5	32.5	No	No	unknown ppt 1	76.4	unknown ppt 1	76.4	No	T2_Spiked_After_Box1_Wz		-
2021-07-08	Spiked	After	1	1	-	Natural Material - SPT ppt	Medium	Wizard	1299	46.8	37.7	46.8	37.7	No	No	unknown ppt 1	80.23	unknown ppt 1	80.23	No	T2_Spiked_After_Box1_Wz		-
2021-07-08	Spiked	After	1	1	-	Natural Material - SPT ppt	Medium	Wizard	1300	85.6	50.5	85.6	50.5	No	No	unknown ppt 1	82.6	unknown ppt 1	82.6	No	T2_Spiked_After_Box1_Wz		-
2021-07-08	Spiked	After	1	1	-	Natural Material - SPT ppt	Medium	Wizard	1301	73.5	41.8	73.5	41.8	No	No	unknown ppt 1	83.4	unknown ppt 1	83.4	No	T2_Spiked_After_Box1_Wz		-
2021-07-08	Spiked	After	1	1	-	PVC	Large	Wizard	1302	2697	980.6	1074	1001	Yes	No	PVC300PLUS_10	98.3	PVC300PLUS_10	98.3	yes	T2_Spiked_After_Box1_Wz		yes
2021-07-08	Spiked	After	1	1	-	Cotton	Fiber	Wizard	1303	66.8	30.6	66.8	30.6	No	Yes	OrangeCottonLabCoat4	93.12	OrangeCottonLabCoat4	93.12	No	T2_Spiked_After_Box1_Wz	orange Fiber contamination, most likely from lab coat	-
2021-07-08	Spiked	After	1	1	-	PVC	Medium	Wizard	1304	240.9	117.7	240.9	117.7	Yes	No	PVC 53-100 1	90.8	PVC 53-100 1	90.8	No	T2_Spiked_After_Box1_Wz		yes
2021-07-08	Spiked	After	1	1	-	Natural Material - Crumb Rubber Changed	Medium	Wizard	1305	235.4	57.5	235.4	57.5	Yes	No	CR300PLUS_7	77.5	CR300PLUS_7	77.5	No	T2_Spiked_After_Box1_Wz	particle looks light, may not be crumb rubber not sure	no
2021-07-08	Spiked	After	1	1	-	Natural Material - SPT ppt	Medium	Wizard	1306	63	26.2	63	26.2	No	No	unknown ppt 1	83.4	unknown ppt 1	83.4	No	T2_Spiked_After_Box1_Wz		-
2021-07-08	Spiked	After	1	1	-	Natural Material - Crumb Rubber Changed	Medium	Wizard	1307	76.2	48.5	76.2	48.5	No	No	CR300PLUS_7	75.69	CR300PLUS_7	75.69	No	T2_Spiked_After_Box1_Wz	no black particle under point, may just be carbon based natural material	no
2021-07-08	Spiked	After	1	1	-	Unidentified	Medium	Wizard	1308	114.2	82.1	114.2	82.1	Yes	No	Unidentified	0	Unidentified	0	No	T2_Spiked_After_Box1_Wz		-
2021-07-08	Spiked	After	1	1	-	Natural Material - SPT ppt	Medium	Wizard	1309	135.3	81.1	135.3	81.1	Yes	No	unknown ppt 1	76.06	unknown ppt 1	76.06	No	T2_Spiked_After_Box1_Wz		-
2021-07-08	Spiked	After	1	1	-	CR	Medium	Wizard	1310	198.7	105.9	198.7	105.9	Yes	No	CR_sedimentproject*2	86.36	CR_sedimentproject*2	86.36	No	T2_Spiked_After_Box1_Wz		yes
2021-07-08	Spiked	After	1	1	-	Natural Material	Medium	Wizard	1311	160.4	31.9	160.4	31.9	Yes	No	NYLON6300PLUS_4	98.86	NYLON6300PLUS_4	98.86	No	T2_Spiked_After_Box1_Wz	also in box 5	yes
2021-07-08	Spiked	After	1	1	-	Unidentified	Medium	Wizard	1312	0	0	0	0	No	No	Unidentified	0	Unidentified	0	No	T2_Spiked_After_Box1_Wz		-
2021-07-09	Spiked	After	1	2	-	CA	Fiber	Point and Shoot	3	2806.96	35.88	2806.96	35.88	Yes	Yes	Cellulose Acetate Fiber 2	0.9529	Cellulose Acetate Fiber 2	0.9529	No	T2_Spiked_After_Box2 Numbered Fragments	Fiber	yes
2021-07-09	Spiked	After	1	2	-	CA	Fiber	Point and Shoot	4	1140.72	28.52	1140.72	28.52	Yes	Yes	Cellulose Acetate Fiber 2	0.8952	Cellulose Acetate Fiber 2	0.8952	No	T2_Spiked_After_Box2 Numbered Fragments	Fiber	yes
2021-07-09	Spiked	After	1	2	-	PEST	Fiber	Point and Shoot	5	1361.68	15.12	1361.68	15.12	Yes	Yes	PEST JK Fiber a	0.7597	PEST JK Fiber a	0.7597	No	T2_Spiked_After_Box2 Numbered Fragments	Fiber	yes
2021-07-09	Spiked	After	1	2	-	Natural Material - SPT ppt	Medium	Wizard	1	81.1	46.7	81.1	46.7	No	No	unknown ppt 1	83.31	unknown ppt 1	83.31	No	T2_Spiked_After_Box2_Wz		-
2021-07-09	Spiked	After	1	2	-	Natural Material - SPT ppt	Medium	Wizard	2	239.8	108.5	239.8	108.5	Yes	No	unknown ppt 1	92.22	unknown ppt 1	92.22	No	T2_Spiked_After_Box2_Wz		-
2021-07-09	Spiked	After	1	2	-	PP	Large	Wizard	3	1588	1002.6	1588	1002.6	Yes	No	PP_SIGMA_42789-6_2	98.06	PP_SIGMA_42789-6_2	98.06	No	T2_Spiked_After_Box2_Wz		yes
2021-07-09	Spiked	After	1	2	-	Natural Material - SPT ppt	Medium	Wizard	4	119.9	51.3	119.9	51.3	Yes	No	unknown ppt 1	95.29	unknown ppt 1	95.29	No	T2_Spiked_After_Box2_Wz		-
2021-07-09	Spiked	After	1	2	-	Unidentified	Medium	Wizard	5	74.9	51.5	74.9	51.5	No	No	Unidentified	0	Unidentified	0	No	T2_Spiked_After_Box2_Wz		-
2021-07-09	Spiked	After	1	2	-	Unidentified	Medium	Wizard	6	101.9	49.8	101.9	49.8	Yes	No	Unidentified	0	Unidentified	0	No	T2_Spiked_After_Box2_Wz		-
2021-07-09	Spiked	After	1	2	-	Natural Material - SPT ppt	Medium	Wizard	7	134.9	76.3	134.9	76.3	Yes	No	unknown ppt 1	91.28	unknown ppt 1	91.28	No	T2_Spiked_After_Box2_Wz		-
2021-07-09	Spiked	After	1	2	-	Natural Material - SPT ppt	Medium	Wizard	8	70.7	51.6	70.7	51.6	No	No	unknown ppt 1	80.15	unknown ppt 1	80.15	No	T2_Spiked_After_Box2_Wz		-
2021-07-09	Spiked	After	1	2	-	Natural Material - SPT ppt	Medium	Wizard	9	67.4	29.7	67.4	29.7	No	No	unknown ppt 1	86.44	unknown ppt 1	86.44	No	T2_Spiked_After_Box2_Wz		-
2021-07-09	Spiked	After	1	2	-	PP	Large	Wizard	10	666.9	417.6	1343.51	671.22	Yes	No	PP_sigma_42789.6_a	98.27	PP_sigma_42789.6_a	98.27	yes	T2_Spiked_After_Box2_Wz	same particle as Box 2 #12 and Box 3 #1007	no
2021-07-09	Spiked	After	1	2	-	Natural Material - SPT ppt	Medium	Wizard	11	142.4	87.4	142.4	87.4	Yes	No	unknown ppt 1	85.32	unknown ppt 1	85.32	No	T2_Spiked_After_Box2_Wz		-
2021-07-09	Spiked	After	1	2	-	PP	Large	Wizard	12	1343.5	771.3	1343.5	771.3	Yes	No	PP300PLUS_3	98.51	PP300PLUS_3	98.51	No	T2_Spiked_After_Box2_Wz	same particle as Box 2 #10 and Box 3 #1007	no
2021-07-09	Spiked	After	1	2	-	PP	Large	Wizard	13	1071.7	562.6	1071.7	562.6	Yes	No	PP_sigma_42789.6_a	98.98	PP_sigma_42789.6_a	98.98	No	T2_Spiked_After_Box2_Wz	same particle as Box #3 # 834	yes
2021-07-09	Spiked	After	1	2	-	Natural Material - SPT ppt	Medium	Wizard	14	59.9	25	59.9	25	No	No	unknown ppt 1	87.15	unknown ppt 1	87.15	No	T2_Spiked_After_Box2_Wz		-
2021-07-09	Spiked	After	1	2	-	PS	Large	Wizard	15	388.8	201.7	388.8	201.7	Yes	No	PS 100 - 300 4	94.14	PS 100 - 300 4	94.14	No	T2_Spiked_After_Box2_Wz		yes
2021-07-09	Spiked	After	1	2	-	Natural Material - SPT ppt	Medium	Wizard	16	104.9	40.2	104.9	40.2	Yes	No	unknown ppt 1	83.87	unknown ppt 1	83.87	No	T2_Spiked_After_Box2_Wz		-
2021-07-09	Spiked	After	1	2	-	Natural Material	Medium	Wizard	17	67.4	39.2	67.4	39.2	No	No	Feather2	85.38	Feather2	85.38	No	T2_Spiked_After_Box2_Wz		-
2021-07-09	Spiked	After	1	2	-	Natural Material - SPT ppt	Medium	Wizard	18	104.9	55.2	104.9	55.2	Yes	No	unknown ppt 1	89.1	unknown ppt 1	89.1	No	T2_Spiked_After_Box2_Wz		-
2021-07-09	Spiked	After	1	2	-	Natural Material	Medium	Wizard	19	60.4	52.1	60.4	52.1	No	No	CrabLeg_1	80.93	CrabLeg_1	80.93	No	T2_Spiked_After_Box2_Wz		-
2021-07-09	Spiked	After	1	2	-	Natural Material - SPT ppt	Medium	Wizard	20	95.4	42	95.4	42	No	No	unknown ppt 1	78.2	unknown ppt 1	78.2	No	T2_Spiked_After_Box2_Wz		-
2021-07-09	Spiked	After	1	2	-	Natural Material - SPT ppt	Medium	Wizard	21	67.4	47.7	67.4	47.7	No	No	unknown ppt 1	86.29	unknown ppt 1	86.29	No	T2_Spiked_After_Box2_Wz		-
2021-07-09	Spiked	After	1	2	-	Natural Material - SPT ppt	Medium	Wizard	22	127.4	46.6	127.4	46.6	Yes	No	unknown ppt 1	82.09	unknown ppt 1	82.09	No	T2_Spiked_After_Box2_Wz		-
2021-07-09	Spiked	After	1	2	-	Natural Material - SPT ppt	Medium	Wizard	23	60.4	49.7	60.4	49.7	No	No	unknown ppt 1	78.35	unknown ppt 1	78.35	No	T2_Spiked_After_Box2_Wz		-
2021-07-09	Spiked	After	1	2	-	Natural Material - SPT ppt	Medium	Wizard	24	59.9	33.4	59.9	33.4	No	No	unknown ppt 1	75.87	unknown ppt 1	75.87	No	T2_Spiked_After_Box2_Wz		-
2021-07-09	Spiked	After	1	2	-	Natural Material - SPT ppt	Medium	Wizard	25	97.4	43.3	97.4	43.3	No	No	unknown ppt 1	86.73	unknown ppt 1	86.73	No	T2_Spiked_After_Box2_Wz		-
2021-07-09	Spiked	After	1	2	-	Natural Material - SPT ppt	Medium	Wizard	26	104.9	68.8	104.9	68.8	Yes	No	unknown ppt 1	86.4	unknown ppt 1	86.4	No	T2_Spiked_After_Box2_Wz		-
2021-07-09	Spiked	After	1	2	-	Natural Material - SPT ppt	Medium	Wizard	27	83.8	58	83.8	58	No	No	unknown ppt 1	85.6	unknown ppt 1	85.6	No	T2_Spiked_After_Box2_Wz		-
2021-07-09	Spiked	After	1	2	-	Natural Material - SPT ppt	Medium	Wizard	28	97.4	49.9	97.4	49.9	No	No	unknown ppt 1	81.25	unknown ppt 1	81.25	No	T2_Spiked_After_Box2_Wz		-
2021-07-09	Spiked	After	1	2	-	Natural Material	Medium	Wizard	29	189.1	113.8	189.1	113.8	Yes	No	KatysHair1	78.6	KatysHair1	78.6	No	T2_Spiked_After_Box2_Wz		-
2021-07-09	Spiked	After	1	2	-	Natural Material	Medium	Wizard	30	262.3	141.2	262.3	141.2	Yes	No	Feather2	87.82	Feather2	87.82	No	T2_Spiked_After_Box2_Wz		-
2021-07-09	Spiked	After	1	2	-	Natural Material - SPT ppt	Large	Wizard	31	400.3	113.2	400.3	113.2	Yes	No	unknown ppt 1	95.44	unknown ppt 1	95.44	No	T2_Spiked_After_Box2_Wz		-
2021-07-09	Spiked	After	1	2	-	Natural Material - Crumb Rubber Changed	Medium	Wizard	32	203.8	84.9	203.8	84.9	Yes	No	CR_ATR3	85.88	CR_ATR3	85.88	No	T2_Spiked_After_Box2_Wz	not a black particle. do not count	no
2021-07-09	Spiked	After	1	2	-	Natural Material - SPT ppt	Medium	Wizard	33	247.3	104.1	247.3	104.1	Yes	No	unknown ppt 1	92.38	unknown ppt 1	92.38	No	T2_Spiked_After_Box2_Wz		-
2021-07-09	Spiked	After	1	2	-	Natural Material - SPT ppt	Medium	Wizard	34	172.3	101.2	172.3	101.2	Yes	No	unknown ppt 1	87.34	unknown ppt 1	87.34	No	T2_Spiked_After_Box2_Wz		-
2021-07-09	Spiked	After	1	2	-	Natural Material	Medium	Wizard	35	97.7	68.8	97.7	68.8	No	No	CrabLeg_1	80.19	CrabLeg_1	80.19	No	T2_Spiked_After_Box2_Wz		-
2021-07-09	Spiked	After	1	2	-	Natural Material - SPT ppt	Medium	Wizard	36	134.9	77.4	134.9	77.4	Yes	No	unknown ppt 1	93.02	unknown ppt 1	93.02	No	T2_Spiked_After_Box2_Wz		-
2021-07-09	Spiked	After	1	2	-	Natural Material - SPT ppt	Medium	Wizard	37	97.4	45.5	97.4	45.5	No	No	unknown ppt 1	92.2	unknown ppt 1	92.2	No	T2_Spiked_After_Box2_Wz		-
2021-07-09	Spiked	After	1	2	-	check box 3	Large	Wizard	38	381.9	126.9	381.9	126.9	Yes	No	NYLON6300PLUS_7	98.54	NYLON6300PLUS_7	98.54	No	T2_Spiked_After_Box2_Wz	same point as box 3 pt. 982	yes
2021-07-09	Spiked	After	1	2	-	Natural Material - SPT ppt	Medium	Wizard	39	127.4	30.9	127.4	30.9	Yes	No	unknown ppt 1	84.58	unknown ppt 1	84.58	No	T2_Spiked_After_Box2_Wz		-
2021-07-09	Spiked	After	1	2	-	Natural Material - Crumb Rubber Changed	Medium	Wizard	40	137.6	42.6	137.6	42.6	Yes	No	CR300PLUS_11	83.73	CR300PLUS_11	83.73	No	T2_Spiked_After_Box2_Wz	lighter particle, do not know wheather to count or not ?	no
2021-07-09	Spiked	After	1	2	-	CR	Medium	Wizard	41	171	124.1	171	124.1	Yes	No	CR_sedimentproject*2	87.96	CR_sedimentproject*2	87.96	No	T2_Spiked_After_Box2_Wz		yes
2021-07-09	Spiked	After	1	2	-	Natural Material - SPT ppt	Medium	Wizard	42	59.9	51.3	59.9	51.3	No	No	unknown ppt 1	82.58	unknown ppt 1	82.58	No	T2_Spiked_After_Box2_Wz		-
2021-07-09	Spiked	After	1	2	-	Natural Material	Medium	Wizard	43	164.9	36.9	164.9	36.9	Yes	No	OrangeCottonLabCoat1	92.45	OrangeCottonLabCoat1	92.45	No	T2_Spiked_After_Box2_Wz	partially in box #3, not orange nor a Fiber. most likely natural cellulostic material	-
2021-07-09	Spiked	After	1	2	-	Unidentified	Medium	Wizard	44	171	58.5	171	58.5	Yes	No	Unidentified	0	Unidentified	0	No	T2_Spiked_After_Box2_Wz		-
2021-07-09	Spiked	After	1	2	-	Natural Material - Crumb Rubber Changed	Medium	Wizard	45	137.6	54.1	137.6	54.1	Yes	No	CR_sedimentproject*2	75.46	CR_sedimentproject*2	75.46	No	T2_Spiked_After_Box2_Wz	white particle, does not look like crumb rubber. Do not count, is probably carbon based natural material	no
2021-07-09	Spiked	After	1	2	-	Unidentified	Medium	Wizard	46	132.6	50.2	132.6	50.2	Yes	No	Unidentified	0	Unidentified	0	No	T2_Spiked_After_Box2_Wz		-
2021-07-09	Spiked	After	1	2	-	Nylon	Medium	Wizard	47	74.9	41	60.46	46.39	No	No	NYLON6300PLUS_4	92.41	NYLON6300PLUS_4	92.41	yes	T2_Spiked_After_Box2_Wz	very small particle might be broken off from a large particle	yes
2021-07-09	Spiked	After	1	2	-	Unidentified	Medium	Wizard	48	64.5	41	64.5	41	No	No	Unidentified	0	Unidentified	0	No	T2_Spiked_After_Box2_Wz		-
2021-07-09	Spiked	After	1	2	-	Nylon	Medium	Wizard	49	243.2	157	243.2	157	Yes	No	NYLON 100-300 3	98.54	NYLON 100-300 3	98.54	No	T2_Spiked_After_Box2_Wz		yes
2021-07-09	Spiked	After	1	2	-	CR	Medium	Wizard	50	120.8	71.6	120.8	71.6	Yes	No	CR_ATR1	93.05	CR_ATR1	93.05	No	T2_Spiked_After_Box2_Wz		yes
2021-07-09	Spiked	After	1	2	-	Natural Material	Medium	Wizard	51	82.4	56.4	82.4	56.4	No	No	CrabLeg_1	80.01	CrabLeg_1	80.01	No	T2_Spiked_After_Box2_Wz		-
2021-07-09	Spiked	After	1	2	-	PP	Medium	Wizard	52	277.3	89.7	277.3	89.7	Yes	No	PP 53-100 3	98.59	PP 53-100 3	98.59	No	T2_Spiked_After_Box2_Wz	Box #2 pt. 52 and Box #2 pt. 54 are the same fragment	yes
2021-07-09	Spiked	After	1	2	-	CR	Medium	Wizard	53	134.9	86.4	134.9	86.4	Yes	No	CR_sedimentproject*2	81.94	CR_sedimentproject*2	81.94	No	T2_Spiked_After_Box2_Wz		yes
2021-07-09	Spiked	After	1	2	-	PP	Medium	Wizard	54	82.4	52.9	82.4	52.9	No	No	PolyPacific_3StrandRope	98.38	PolyPacific_3StrandRope	98.38	No	T2_Spiked_After_Box2_Wz	Box #2 pt. 52 and Box #2 pt. 54 are the same	no
2021-07-09	Spiked	After	1	2	-	PP	Medium	Wizard	55	96	25.3	100	25.3	Yes	No	PP300PLUS_5	85.54	PP300PLUS_5	85.54	No	T2_Spiked_After_Box2_Wz	partially covered by another piece	yes
2021-07-09	Spiked	After	1	2	-	PP	Medium	Wizard	56	112.4	41.3	112.4	41.3	Yes	No	PolyPacific_3StrandRope	93.71	PolyPacific_3StrandRope	93.71	No	T2_Spiked_After_Box2_Wz	Box #2 pt. 56 and pt. 58 are the same fragment	yes
2021-07-09	Spiked	After	1	2	-	PVC	Medium	Wizard	57	79.7	34.1	79.7	34.1	No	No	PVC 53-100 2	83.45	PVC 53-100 2	83.45	No	T2_Spiked_After_Box2_Wz	attached to box #2 pt. 52 and 54 but witha different polymer i.d.. poorly defined fragment may be fragmented from a larger piece	yes
2021-07-09	Spiked	After	1	2	-	PP	Medium	Wizard	58	176.11	21.7	176.11	21.7	Yes	No	PP 53-100 4	97.51	PP 53-100 4	97.51	No	T2_Spiked_After_Box2_Wz	Box #2 pt. 56 and pt. 58 are the same fragment	no
2021-07-09	Spiked	After	1	2	-	Nylon	Medium	Wizard	59	137.6	66	137.6	66	Yes	No	NYLON6300PLUS_4	89.35	NYLON6300PLUS_4	89.35	No	T2_Spiked_After_Box2_Wz		yes
2021-07-09	Spiked	After	1	2	-	PVC	Medium	Wizard	60	179.8	83.5	179.8	83.5	Yes	No	PVC 53-100 3	90	PVC 53-100 3	90	No	T2_Spiked_After_Box2_Wz		yes
2021-07-09	Spiked	After	1	2	-	Natural Material	Medium	Wizard	61	82.4	58.1	82.4	58.1	No	No	Algae2_brownside	79.27	Algae2_brownside	79.27	No	T2_Spiked_After_Box2_Wz		-
2021-07-09	Spiked	After	1	2	-	Natural Material	Medium	Wizard	62	60.4	34.3	60.4	34.3	No	No	Feather2Stem	94.94	Feather2Stem	94.94	No	T2_Spiked_After_Box2_Wz		-
2021-07-09	Spiked	After	1	2	-	Natural Material	Medium	Wizard	63	89.9	46.9	89.9	46.9	No	No	Algae2_brownside	88.76	Algae2_brownside	88.76	No	T2_Spiked_After_Box2_Wz		-
2021-07-09	Spiked	After	1	2	-	Natural Material	Medium	Wizard	64	82.4	55.5	82.4	55.5	No	No	Algae1_outside	91.16	Algae1_outside	91.16	No	T2_Spiked_After_Box2_Wz		-
2021-07-09	Spiked	After	1	2	-	Natural Material	Medium	Wizard	65	112.4	74.4	112.4	74.4	Yes	No	KatysHair1	93.69	KatysHair1	93.69	No	T2_Spiked_After_Box2_Wz		-
2021-07-09	Spiked	After	1	2	-	Nylon	Medium	Wizard	66	130.9	58.5	130.9	58.5	Yes	No	NYLON6300PLUS_6	96.87	NYLON6300PLUS_6	96.87	No	T2_Spiked_After_Box2_Wz		yes
2021-07-09	Spiked	After	1	2	-	Unidentified	Medium	Wizard	67	164.9	55.5	164.9	55.5	Yes	No	Unidentified	0	Unidentified	0	No	T2_Spiked_After_Box2_Wz		-
2021-07-09	Spiked	After	1	2	-	Unidentified	Medium	Wizard	68	172.3	84.6	172.3	84.6	Yes	No	Unidentified	0	Unidentified	0	No	T2_Spiked_After_Box2_Wz		-
2021-07-09	Spiked	After	1	2	-	Natural Material	Medium	Wizard	69	60.4	49.7	60.4	49.7	No	No	OrangeCottonLabCoat4	86.86	OrangeCottonLabCoat4	86.86	No	T2_Spiked_After_Box2_Wz	particle looks like fragment, is not organge. propally cellulostic organic material.	-
2021-07-09	Spiked	After	1	2	-	Natural Material - SPT ppt	Medium	Wizard	70	137.6	65.5	137.6	65.5	Yes	No	unknown ppt 1	81.81	unknown ppt 1	81.81	No	T2_Spiked_After_Box2_Wz		-
2021-07-09	Spiked	After	1	2	-	PVC	Large	Wizard	71	1621.1	1179.4	1621.1	1179.4	Yes	No	PVC300PLUS_4	98.33	PVC300PLUS_4	98.33	No	T2_Spiked_After_Box2_Wz		yes
2021-07-09	Spiked	After	1	2	-	Natural Material - SPT ppt	Medium	Wizard	72	74.9	41	74.9	41	No	No	unknown ppt 1	85.56	unknown ppt 1	85.56	No	T2_Spiked_After_Box2_Wz		-
2021-07-09	Spiked	After	1	2	-	Natural Material - SPT ppt	Medium	Wizard	73	119.9	37.6	119.9	37.6	Yes	No	unknown ppt 1	86.14	unknown ppt 1	86.14	No	T2_Spiked_After_Box2_Wz		-
2021-07-09	Spiked	After	1	2	-	Natural Material - SPT ppt	Medium	Wizard	74	64.5	35.5	64.5	35.5	No	No	unknown ppt 1	80.93	unknown ppt 1	80.93	No	T2_Spiked_After_Box2_Wz		-
2021-07-09	Spiked	After	1	2	-	Natural Material - SPT ppt	Medium	Wizard	75	164.9	124.5	164.9	124.5	Yes	No	unknown ppt 1	90.72	unknown ppt 1	90.72	No	T2_Spiked_After_Box2_Wz		-
2021-07-09	Spiked	After	1	2	-	Natural Material - SPT ppt	Medium	Wizard	76	74.9	30.5	74.9	30.5	No	No	unknown ppt 1	85.28	unknown ppt 1	85.28	No	T2_Spiked_After_Box2_Wz		-
2021-07-09	Spiked	After	1	2	-	Natural Material - SPT ppt	Medium	Wizard	77	93.9	41.9	93.9	41.9	No	No	unknown ppt 1	82.18	unknown ppt 1	82.18	No	T2_Spiked_After_Box2_Wz		-
2021-07-09	Spiked	After	1	2	-	Natural Material - SPT ppt	Medium	Wizard	78	97.4	41.8	97.4	41.8	No	No	unknown ppt 1	78.19	unknown ppt 1	78.19	No	T2_Spiked_After_Box2_Wz		-
2021-07-09	Spiked	After	1	2	-	Natural Material - SPT ppt	Medium	Wizard	79	134.9	52.5	134.9	52.5	Yes	No	unknown ppt 1	84.37	unknown ppt 1	84.37	No	T2_Spiked_After_Box2_Wz		-
2021-07-09	Spiked	After	1	2	-	Natural Material - SPT ppt	Medium	Wizard	80	187.3	52.7	187.3	52.7	Yes	No	unknown ppt 1	79.6	unknown ppt 1	79.6	No	T2_Spiked_After_Box2_Wz		-
2021-07-09	Spiked	After	1	2	-	Natural Material - SPT ppt	Medium	Wizard	81	67.4	51.9	67.4	51.9	No	No	unknown ppt 1	79.15	unknown ppt 1	79.15	No	T2_Spiked_After_Box2_Wz		-
2021-07-09	Spiked	After	1	2	-	Natural Material - SPT ppt	Medium	Wizard	82	89.9	43.7	89.9	43.7	No	No	unknown ppt 1	86.94	unknown ppt 1	86.94	No	T2_Spiked_After_Box2_Wz		-
2021-07-09	Spiked	After	1	2	-	Natural Material - SPT ppt	Medium	Wizard	83	89.9	40.5	89.9	40.5	No	No	unknown ppt 1	81.83	unknown ppt 1	81.83	No	T2_Spiked_After_Box2_Wz		-
2021-07-09	Spiked	After	1	2	-	Unidentified	Medium	Wizard	84	114.4	23.8	114.4	23.8	Yes	No	Unidentified	0	Unidentified	0	No	T2_Spiked_After_Box2_Wz		-
2021-07-09	Spiked	After	1	2	-	Unidentified	Large	Wizard	85	307.2	91.9	307.2	91.9	Yes	No	Unidentified	0	Unidentified	0	No	T2_Spiked_After_Box2_Wz		-
2021-07-09	Spiked	After	1	2	-	Natural Material - SPT ppt	Medium	Wizard	86	67.4	40.3	67.4	40.3	No	No	unknown ppt 1	88.59	unknown ppt 1	88.59	No	T2_Spiked_After_Box2_Wz		-
2021-07-09	Spiked	After	1	2	-	Natural Material - SPT ppt	Medium	Wizard	87	212.2	71.1	212.2	71.1	Yes	No	unknown ppt 1	80.37	unknown ppt 1	80.37	No	T2_Spiked_After_Box2_Wz		-
2021-07-09	Spiked	After	1	2	-	Natural Material - SPT ppt	Large	Wizard	88	309.8	88.9	309.8	88.9	Yes	No	unknown ppt 1	87.16	unknown ppt 1	87.16	No	T2_Spiked_After_Box2_Wz		-
2021-07-09	Spiked	After	1	2	-	Natural Material - SPT ppt	Medium	Wizard	89	59.9	19.1	59.9	19.1	No	No	unknown ppt 1	75.71	unknown ppt 1	75.71	No	T2_Spiked_After_Box2_Wz		-
2021-07-09	Spiked	After	1	2	-	Natural Material - SPT ppt	Medium	Wizard	90	67.4	47.7	67.4	47.7	No	No	unknown ppt 1	79.82	unknown ppt 1	79.82	No	T2_Spiked_After_Box2_Wz		-
2021-07-09	Spiked	After	1	2	-	Natural Material - SPT ppt	Medium	Wizard	91	132.6	70.6	132.6	70.6	Yes	No	unknown ppt 1	87.1	unknown ppt 1	87.1	No	T2_Spiked_After_Box2_Wz		-
2021-07-09	Spiked	After	1	2	-	Natural Material - SPT ppt	Medium	Wizard	92	128	46.9	128	46.9	Yes	No	unknown ppt 1	76.66	unknown ppt 1	76.66	No	T2_Spiked_After_Box2_Wz		-
2021-07-09	Spiked	After	1	2	-	Natural Material - SPT ppt	Medium	Wizard	93	97.4	61.6	97.4	61.6	No	No	unknown ppt 1	78.89	unknown ppt 1	78.89	No	T2_Spiked_After_Box2_Wz		-
2021-07-09	Spiked	After	1	2	-	Natural Material - SPT ppt	Medium	Wizard	94	119.9	51.9	119.9	51.9	Yes	No	unknown ppt 1	81.95	unknown ppt 1	81.95	No	T2_Spiked_After_Box2_Wz		-
2021-07-09	Spiked	After	1	2	-	Natural Material - SPT ppt	Medium	Wizard	95	173	59.9	173	59.9	Yes	No	unknown ppt 1	79.51	unknown ppt 1	79.51	No	T2_Spiked_After_Box2_Wz		-
2021-07-09	Spiked	After	1	2	-	Natural Material - SPT ppt	Medium	Wizard	96	119.9	87.7	119.9	87.7	Yes	No	unknown ppt 1	86.85	unknown ppt 1	86.85	No	T2_Spiked_After_Box2_Wz		-
2021-07-09	Spiked	After	1	2	-	Natural Material - SPT ppt	Medium	Wizard	97	97.4	30.8	97.4	30.8	No	No	unknown ppt 1	84.4	unknown ppt 1	84.4	No	T2_Spiked_After_Box2_Wz		-
2021-07-09	Spiked	After	1	2	-	Natural Material - SPT ppt	Medium	Wizard	98	59.9	47.7	59.9	47.7	No	No	unknown ppt 1	90.98	unknown ppt 1	90.98	No	T2_Spiked_After_Box2_Wz		-
2021-07-09	Spiked	After	1	2	-	Natural Material - SPT ppt	Medium	Wizard	99	119.9	40	119.9	40	Yes	No	unknown ppt 1	92.87	unknown ppt 1	92.87	No	T2_Spiked_After_Box2_Wz		-
[truncated: 19,834 more rows]
